# Supplementary material for: Copper-Catalyzed Ring-Opening Reactions of Alkyl Aziridines with B2pin2: Experimental and Computational Studies
Source: MDPI journal article supplement (doi:10.3390/molecules26237399), 2021-12-06

# SUPPORTING INFORMATION

## Copper-Catalyzed Ring-Opening Reactions of Alkyl Aziridines with B<sub>2</sub>pin<sub>2</sub>: Experimental and Computational Studies

Lucilla Favero\*, Andrea Menichetti, Cosimo Boldrini, Lucrezia Margherita Comparini, Valeria Di Bussolo, Sebastiano Di Pietro and Mauro Pineschi \*

Department of Pharmacy, University of Pisa, Via Bonanno 33, 56126 Pisa, Italy.

\*Correspondence: lucilla.favero@unipi.it; Tel.: +39-050-221-9685

\* Correspondence: mauro.pineschi@unipi.it; Tel.: +39-050-221-9668

### Contents

|                                                              |      |
|--------------------------------------------------------------|------|
| General synthetic pathway for substrates formation . . . . . | S1   |
| Aziridines protection. . . . .                               | S1   |
| Picolin-2-yl protection. . . . .                             | S2   |
| References. . . . .                                          | S5   |
| Computational Section. . . . .                               | S6   |
| <sup>1</sup> H and <sup>13</sup> C NMR spectra. . . . .      | S176 |

## General synthetic pathway for substrates formation

Aziridines were synthesized following the synthetic pathway shown in **Scheme S1**. Only aziridine **5c** was formed starting from the corresponding alkene following a literature procedure **A'**.<sup>1</sup>

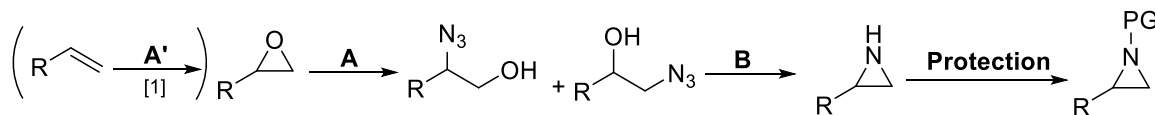

**Scheme S1.** Synthetic pathway for the synthesis of aziridines.

**A.** A round-bottomed flask was charged with the corresponding epoxide, NaN<sub>3</sub>, NH<sub>4</sub>Cl and solvent, and the mixture was left to stir overnight at reflux. After workup, the crude containing a regioisomeric mixture was used without any further purification. Complete procedures and spectra are described in the literature for each compound.<sup>2-7</sup>

**B.** A round-bottomed flask was charged with the corresponding azido alcohol regioisomeric mixture (1.0 equiv.) in CH<sub>3</sub>CN or MTBE, and PPh<sub>3</sub> (1.0 equiv.) was portionwise added. When no evolution of nitrogen was noticed, the mixture was warmed up to reflux overnight. Then, the solvent was evaporated, and the solid residue was suspended in a 1:1 mixture of hexane/AcOEt. The residue solid (triphenylphosphine oxide) was filtered away. Complete procedures and spectra are described in the literature for each compounds.<sup>1,3-5,8-11</sup>

## Aziridines protection

### 2-(phoxymethyl)-1-tosylaziridine (**1a**)

According to literature procedure,<sup>12</sup> a three-neck round-bottomed flask was charged with corresponding unprotected aziridine (300 mg, 2.0 mmol), dry Et<sub>2</sub>O (7 mL), Et<sub>3</sub>N (0.38 mL) and 2-(trifluoromethyl)benzenesulfonyl chloride (434 mg, 2.3 mmol, portionwise) under argon. The reaction was left to react until no aziridine was detected by TLC, and cooled at 0°C. Then, 10 mL of water and 10 mL of saturated solution of NaHCO<sub>3</sub> were slowly added. The organic layer was separated and the aqueous layer was extracted three times with Et<sub>2</sub>O (20 mL). Collected organic layers were washed with brine (15 mg) and dried with MgSO<sub>4</sub>. The crude was purified by flash chromatography (hexane/AcOEt 8:2) affording the title compound (321.6 mg, 60%) as white solid. <sup>1</sup>H NMR (250 MHz, CDCl<sub>3</sub>) δ 7.92 – 7.76 (m, 2H), 7.38 – 7.27 (m, 2H), 7.26 – 7.16 (m, 2H), 7.01 – 6.87 (m, 1H), 6.80 – 6.68 (m, 2H), 4.05 (dd, J = 10.8, 4.4 Hz, 1H), 3.92 (dd, J = 10.8, 6.0 Hz, 1H), 3.21 – 3.10 (m, 1H), 2.80 (d, J = 7.1 Hz, 1H), 2.45 (s, 3H), 2.35 (d, J = 4.4 Hz, 1H). <sup>13</sup>C NMR (63 MHz, CDCl<sub>3</sub>) δ ppm: 158.1, 144.8, 129.8, 129.6, 128.2, 121.4, 114.6, 67.1, 38.3, 31.2, 21.8. [M + Na]<sup>+</sup> found = 326.0825, C<sub>16</sub>H<sub>17</sub>NO<sub>3</sub>SN<sup>+</sup> requires 326.0821.

### 2-(phoxymethyl)-1-((2-(trifluoromethyl)phenyl)sulfonyl)aziridine (**1b**)

According to literature procedure,<sup>12</sup> a three-neck round-bottomed flask was charged with corresponding unprotected aziridine (300 mg, 2.0 mmol), dry Et<sub>2</sub>O (7 mL), Et<sub>3</sub>N (0.38 mL) and 2-(trifluoromethyl)benzenesulfonyl chloride (580 mg, 2.3 mmol, portionwise) under argon. The reaction was left to react until no aziridine was detected by TLC, and cooled at 0°C. Then, 10 mL of water and 10 mL of saturated solution of NaHCO<sub>3</sub> were slowly added. The organic layer was separated and the aqueous layer was extracted three times with Et<sub>2</sub>O (20 mL). Collected organic layers were washed with brine (15 mg) and dried with MgSO<sub>4</sub>. The crude was purified by flash chromatography (hexane/AcOEt 8:2) affording the title compound (321.6 mg, 45%) as white solid. <sup>1</sup>H NMR (250 MHz, CDCl<sub>3</sub>) δ 8.42 – 8.30 (m, 1H), 8.01 – 7.93 (m, 1H), 7.87 – 7.75 (m, 2H), 7.35 – 7.25 (m, 2H), 7.05 – 6.96 (m, 1H), 6.87 – 6.77 (m, 2H), 4.26 – 4.01 (m, 2H), 3.47 – 3.36 (m, 1H), 3.05 (d, *J* = 7.2 Hz, 1H), 2.55 (d, *J* = 4.6 Hz, 1H). <sup>13</sup>C NMR (63 MHz, CDCl<sub>3</sub>) δ 158.1, 133.7, 132.4, 132.2, 129.6, 128.44 (q, *J* = 6.3 Hz), 124.7, 121.5, 120.3, 114.6, 66.9, 39.4, 32.4. [M + Na]<sup>+</sup> found = 380.0542, C<sub>16</sub>H<sub>14</sub>F<sub>3</sub>NO<sub>3</sub>SN<sup>+</sup> requires 380.0539.

## Picolin-2-yl protection

**General procedure C.** A round-bottomed flask was charged with 2-picolinic acid (1.05 equiv.), DCC (1.1 equiv.), DMAP (0.2 equiv.) and freshly distilled DCM (8 mL per equivalent of aziridine). Then, a solution of corresponding aziridine (1.0 equiv., DCM 1 M) was slowly added. The reaction mixture was left to vigorously stir until no aziridine was detected by TLC, and the reaction mixture was filtered on celite. After evaporation of the solvent, the crude was purified by flash chromatography.<sup>13</sup>

### (2-(phenoxymethyl)aziridin-1-yl)(pyridin-2-yl)methanone (1c)

According to general procedure C, a round-bottomed flask was charged with 2-picolinic acid (264 mg, 2.1 mmol), DCC (454 mg, 2.2 mmol), DMAP (24.4 mg, 0.2 mmol), DCM (8 mL), and corresponding unprotected aziridine (300 mg, 2.0 mmol in 2 mL of DCM). After standard workup, the crude was purified by flash chromatography (hexanes/AcOEt 7:3) affording the title compound (280 mg, 55%) as waxy yellow solid. m.p. = 55-56°C. <sup>1</sup>H NMR (250 MHz, CDCl<sub>3</sub>) δ 8.67 (d, *J* = 4.7 Hz, 1H), 8.11 (d, *J* = 7.9 Hz, 1H), 7.77 (dd, *J* = 7.7, 1.8 Hz, 1H), 7.41 (ddd, *J* = 7.6, 4.7, 1.3 Hz, 1H), 7.28 – 7.18 (m, 2H), 6.96 – 6.84 (m, 3H), 4.52 (dd, *J* = 10.4, 3.8 Hz, 1H), 4.09 (dd, *J* = 10.5, 5.7 Hz, 1H), 3.17 – 3.09 (m, 1H), 2.66 (d, *J* = 5.6 Hz, 1H), 2.57 (d, *J* = 3.6 Hz, 1H). <sup>13</sup>C NMR (101 MHz, CDCl<sub>3</sub>) δ 176.5, 158.4, 150.4, 149.3, 136.9, 129.5, 126.8, 124.2, 121.2, 114.6, 7.6, 36.8, 29.6. [M + Na]<sup>+</sup> found = 277.0954, C<sub>15</sub>H<sub>14</sub>N<sub>2</sub>O<sub>2</sub>Na<sup>+</sup> requires 277.0947.

### (2-(((tert-butyldimethylsilyl)oxy)methyl)aziridin-1-yl)(pyridin-2-yl)methanone (4c)

According to procedure C, a round-bottomed flask was charged with 2-picolinic acid (643 mg, 5.2 mmol), DCC (1.07 g, 5.2 mmol), DMAP (39.5 mg, 0.32 mmol), DCM (15 mL), and corresponding unprotected aziridine (605 mg, 3.2 mmol in 3.2 mL of DCM). After standard workup, the crude was purified by flash chromatography (petroleum ether/AcOEt 9:1 + 3% Et<sub>3</sub>N) affording the title compound (191 mg, 20%) as white solid. <sup>1</sup>H NMR (250 MHz, CDCl<sub>3</sub>) δ 8.75 – 8.64 (m, 1H), 8.19 – 8.12 (m, 1H), 7.81 (td, *J* = 7.7, 1.8 Hz, 1H), 7.43 (ddd, *J* = 7.6, 4.7,

1.2 Hz, 1H), 4.08 (dd,  $J = 11.2, 3.0$  Hz, 1H), 3.84 (dd,  $J = 11.2, 4.2$  Hz, 1H), 3.02 – 2.93 (m, 1H), 2.54 – 2.46 (m, 2H), 0.82 (s, 9H), -0.01 (s, 3H), -0.10 (s, 3H).  $^{13}\text{C}$  NMR (101 MHz,  $\text{CDCl}_3$ )  $\delta$  176.7, 149.3, 148.4, 136.9, 126.5, 124.2, 61.8, 39.9, 27.9, 26.0, 25.9, -5.4, -5.4.  $[\text{M} + \text{Na}]^+$  found = 315.1501,  $\text{C}_{15}\text{H}_{24}\text{N}_2\text{O}_2\text{SiNa}^+$  requires 315.1499.

#### **(7-azabicyclo[4.1.0]hept-3-en-7-yl)(pyridin-2-yl)methanone (5c)**

A modified procedure was used because of volatility of NH-free aziridine. In a round-bottomed flask, to a solution of corresponding azido alcohol 6-azidocyclohex-3-en-1-ol (409 mg, 2.294 mmol) in MTBE (4 mL, 0.88 M),  $\text{PPh}_3$  was portionwise added. When no formation of  $\text{N}_2$  was observed, the reaction mixture was heated up to reflux overnight. Then, the solution was filtered in order to separate triphenylphosphine oxide. Meanwhile, a round-bottomed flask was charged with 2-picolinic acid (380 mg, 3.09 mmol), DCC (667 mg, 2.32 mmol), DMAP (36 mg, 0.29 mmol), DCM (14 mL) and the previously filtered solution was dropwise added. The reaction mixture was left to react overnight, and after standard workup, the crude was purified by flash chromatography (hexanes/Et<sub>2</sub>O 5:5 + 2% Et<sub>3</sub>N) affording the title compound (325 mg, 55%) as white solid. The spectral data are consistent with literature.<sup>14</sup>

#### **(2-benzylaziridin-1-yl)(pyridin-2-yl)methanone (6c)**

According to procedure C, a round-bottomed flask was charged with 2-picolinic acid (606 mg, 5.52 mmol), DCC (1.2 g, 5.79 mmol), DMAP (63.5 mg, 0.53 mmol), DCM (16 mL), and corresponding unprotected aziridine (700 mg, 5.26 mmol in 4 mL of DCM). After standard workup, the crude was purified by flash chromatography (hexanes/AcOEt 7:3;  $R_f = 0.45$ ) affording the title compound (400 mg, 35%) as yellow oil.  $^1\text{H}$  NMR (400 MHz,  $\text{CDCl}_3$ )  $\delta$  8.74 (d,  $J = 4.8$  Hz, 0H), 8.14 (d,  $J = 7.9$  Hz, 1H), 7.84 (td,  $J = 7.7, 1.8$  Hz, 1H), 7.48 (ddd,  $J = 7.6, 4.7, 1.3$  Hz, 1H), 7.40 – 7.20 (m, 4H), 3.42 (dd,  $J = 14.3, 4.5$  Hz, 1H), 3.06 – 2.93 (m, 1H), 2.80 (dd,  $J = 14.4, 7.6$  Hz, 1H), 2.62 (d,  $J = 5.6$  Hz, 1H), 2.42 (d,  $J = 3.6$  Hz, 1H).  $^{13}\text{C}$  NMR (101 MHz,  $\text{CDCl}_3$ )  $\delta$  176.2, 158.2, 150.2, 149.0, 136.7, 129.3, 126.5, 123.9, 121.0, 114.4, 67.3, 36.6, 29.3.  $[\text{M} + \text{Na}]^+$  found = 261.0989,  $\text{C}_{15}\text{H}_{14}\text{N}_2\text{ONa}^+$  requires 261.0998

#### **(2-hexylaziridin-1-yl)(pyridin-2-yl)methanone (7c)**

According to procedure C, a round-bottomed flask was charged with 2-picolinic acid (264 mg, 2.1 mmol), DCC (454 mg, 2.2 mmol), DMAP (24.4 mg, 0.2 mmol), DCM (8 mL), and corresponding unprotected aziridine (254.5 mg, 2.0 mmol in 2 mL of DCM). After standard workup, the crude was purified by flash chromatography (hexanes/AcOEt 7:3) affording the title compound (209 mg, 45%) as yellow oil.  $^1\text{H}$  NMR (250 MHz,  $\text{CDCl}_3$ )  $\delta$  8.69 (dt,  $J = 4.8, 1.4$  Hz, 1H), 8.09 (d,  $J = 7.8$  Hz, 1H), 7.81 (td,  $J = 7.8, 1.8$  Hz, 1H), 7.42 (ddd,  $J = 7.6, 4.8, 1.2$  Hz, 1H), 2.74 – 2.63 (m, 1H), 2.53 (d,  $J = 5.7$  Hz, 1H), 2.29 (d,  $J = 3.7$  Hz, 1H), 1.95 – 1.81 (m, 1H), 1.54 – 1.23 (m, 9H), 0.86 (t,  $J = 6.5$  Hz, 3H).  $^{13}\text{C}$  NMR (63 MHz,  $\text{CDCl}_3$ )  $\delta$  177.4, 150.9, 149.4, 136.9, 126.6, 124.1, 38.9, 32.3, 32.0, 31.8, 29.1, 26.8, 22.7, 14.2.  $[\text{M} + \text{Na}]^+$  found = 255.1471,  $\text{C}_{14}\text{H}_{20}\text{N}_2\text{ONa}^+$  requires 255.1468

#### **(6-azabicyclo[3.1.0]hexan-6-yl)(pyridin-2-yl)methanone (8c)**

According to procedure C, a round-bottomed flask was charged with 2-picolinic acid (946 mg, 7.6 mmol), DCC (1.79 g, 8.69 mmol), DMAP (88.4 mg, 0.724 mmol), DCM (20 mL), and unprotected aziridine (603 mg, 7.24

mmol in 7.2 mL of DCM). After standard workup, the crude was purified by flash chromatography (Petroleum ether/AcOEt 8:2 + 3% Et<sub>3</sub>N, R<sub>f</sub> = 0.26) affording the title compound (1.08 g, 79%) as yellowish solid. The spectral data are consistent with literature.<sup>15</sup>

**(7-azabicyclo[4.1.0]heptan-7-yl)(pyridin-2-yl)methanone (9c)**

According to procedure C, a round-bottomed flask was charged with 2-picolinic acid (1.3 g, 10.5 mmol), DCC (2.27 g, 11.0 mmol), DMAP (122.2 mg, 1.0 mmol), DCM (40 mL), and unprotected aziridine (972 mg, 10.0 mmol in 10 mL of DCM). After standard workup, the crude was purified by flash chromatography (Hexane/AcOEt 7:3, R<sub>f</sub> = 0.25) affording the title compound (1.02 g, 50%) as yellowish solid. The spectral data are consistent with literature.<sup>15</sup>

**(2-phenethylaziridin-1-yl)(pyridin-2-yl)methanone (10)**

According to procedure C, a round-bottomed flask was charged with 2-picolinic acid (388 mg, 3.15 mmol), DCC (618 mg, 3.3 mmol), DMAP (36.7 mg, 0.3 mmol), DCM (15 mL), and unprotected aziridine (441 mg, 3.0 mmol in 3 mL of DCM). After standard workup, the crude was purified by flash chromatography (hexane/AcOEt 7:3 + 1% Et<sub>3</sub>N, R<sub>f</sub> = 0.33) affording the title compound (400 mg, 53%) as yellowish solid. <sup>1</sup>H NMR (250 MHz, CDCl<sub>3</sub>) δ 8.70 (ddd, J = 4.7, 1.8, 0.9 Hz, 1H), 8.10 (dt, J = 7.9, 1.1 Hz, 1H), 7.81 (td, J = 7.7, 1.8 Hz, 1H), 7.43 (ddd, J = 7.6, 4.8, 1.3 Hz, 1H), 7.33 – 7.13 (m, 5H), 2.93 – 2.70 (m, 3H), 2.53 (d, J = 5.8 Hz, 1H), 2.29 (d, J = 3.7 Hz, 1H), 2.27 – 2.13 (m, 1H), 1.90 – 1.73 (m, 1H). <sup>13</sup>C NMR (63 MHz, CDCl<sub>3</sub>) δ 177.0, 150.5, 149.1, 141.2, 136.7, 128.3, 126.4, 125.8, 123.8, 38.0, 33.9, 32.9, 31.8. [M + Na]<sup>+</sup> found = 275.1159, C<sub>16</sub>H<sub>16</sub>N<sub>2</sub>ONa<sup>+</sup> requires 275.1155

## References

1. Fukuta, Y.; Mita, T.; Fukuda, N.; Kanai, M.; Shibasaki, M. De Novo Synthesis of Tamiflu via a Catalytic Asymmetric Ring-Opening of *meso*-Aziridines with TMSN<sub>3</sub>. *J. Am. Chem. Soc.* 2006, 128, 6312–6313.
2. Sommerdijk, N. A. J. M.; Buynsters, P. J. J. A.; Akdemir, H.; Geurts, D. G.; Nolte, R. J. M.; Zwanenburg, B. Aziridines as Precursors for Chiral Amide-Containing Surfactants. *J. Org. Chem.* 1997, 62, 4955–4960.
3. Christoffers, J.; Schulze, Y.; Pickardt, J. Synthesis, resolution, and absolute configuration of *trans*-1-amino-2-dimethylaminocyclohexane. *Tetrahedron* 2001, 57, 1765–1769.
4. Namutebi, M.; McGarrigle, E. M.; Aggarwal, V. K. Ring-Opening of NH-Aziridines with Thiols in Ionic Liquids: Application to the Synthesis of Aminosulfide Catalysts for Asymmetric Epoxidation of Aldehydes. *Phosphorus, Sulfur Silicon Relat. Elem.* 2010, 185, 1250–1272.
5. McLeod, D. C.; Tsarevsky, N. V. Reversible Deactivation Radical Polymerization of Monomers Containing Activated Aziridine Groups. *Macromol. Rapid Commun.* 2016, 37, 1694–1700.
6. Schrittwieser, J. H.; Lavandera, I.; Seisser, B.; Mautner, B.; Kroutil, W. Biocatalytic Cascade for the Synthesis of Enantiopure  $\beta$ -Azidoalcohols and  $\beta$ -Hydroxynitriles. *European J. Org. Chem.* 2009, No. 14, 2293–2298.
7. Namba, K.; Mera, A.; Osawa, A.; Sakuda, E.; Kitamura, N.; Tanino, K. One-Pot Synthesis of Highly Fluorescent 2,5-Disubstituted-1,3a,6a-triazapentalene. *Org. Lett.* 2012, 14, 5554–5557.
8. Hanessian, S.; Del Valle, J. R.; Xue, Y.; Blomberg, N. Total Synthesis and Structural Confirmation of Chlorodysinosin A. *J. Am. Chem. Soc.* 2006, 128, 10491–10495.
9. Jun, Y. C.; Borch, R. F. Highly Efficient Synthesis of Enantiomerically Enriched 2-Hydroxymethylaziridines by Enzymatic Desymmetrization. *Org. Lett.* 2007, 9, 215–218.
10. Lebel, H.; Lectard, S.; Parmentier, M. Copper-Catalyzed Alkene Aziridination with *N*-Tosyloxycarbamates. *Org. Lett.* 2007, 9, 4797–4800.
11. Buckley, B. R.; Patel, A. P.; Wijayantha, K. G. U. Observations on the Modified Wenker Synthesis of Aziridines and the Development of a Biphasic System. *J. Org. Chem.* 2013, 78, 1289–1292.
12. Ankner, T.; Hilmersson, G. Instantaneous Deprotection of Tosylamides and Esters with SmI<sub>2</sub>/Amine/Water. *Org. Lett.* 2009, 11, 503–506.
13. Hayashi, M.; Shiomi, N.; Funahashi, Y.; Nakamura, S. Cinchona Alkaloid Amides/Dialkylzinc Catalyzed Enantioselective Desymmetrization of Aziridines with Phosphites. *J. Am. Chem. Soc.* 2012, 134, 19366–19369.
14. Li, J.; Liao, Y.; Zhang, Y.; Liu, X.; Lin, L.; Feng, X. Chiral magnesium(II)-catalyzed asymmetric ring-opening of *meso*-aziridines with primary alcohols. *Chem. Commun.* 2014, 50, 6672–6674.
15. Wang, L.; Yang, D.; Han, F.; Li, D.; Zhao, D.; Wang, R. Catalytic Asymmetric Construction of Pyrroloindolines via an in Situ Generated Magnesium Catalyst. *Org. Lett.* 2015, 17, 176–179.

# COMPUTATIONAL SECTION

Table S1. Two-Copper model, substitution of chloride with alkoxide anion: comparison of activation Free Energies (kJ/mol) corresponding to **TS3** and **TS4** from *N*-(2-picolinoyl)-methyl aziridine.

| Anion                      | $\Delta G^\ddagger$ ( <b>TS3</b> ) | $\Delta G^\ddagger$ ( <b>TS4</b> ) | $\Delta\Delta G^*$ ( <b>TS3-TS4</b> ) |
|----------------------------|------------------------------------|------------------------------------|---------------------------------------|
| Cl <sup>-</sup>            | +82.6                              | +69.0                              | 13.6                                  |
| MeO <sup>-</sup>           | +74.4                              | +58.5                              | 15.9                                  |
| <i>t</i> -BuO <sup>-</sup> | +76.7                              | +58.4                              | 18.3                                  |

<sup>a</sup> (A) see ref. 29, main text, and Thermochemical Data , pag S77-S86.

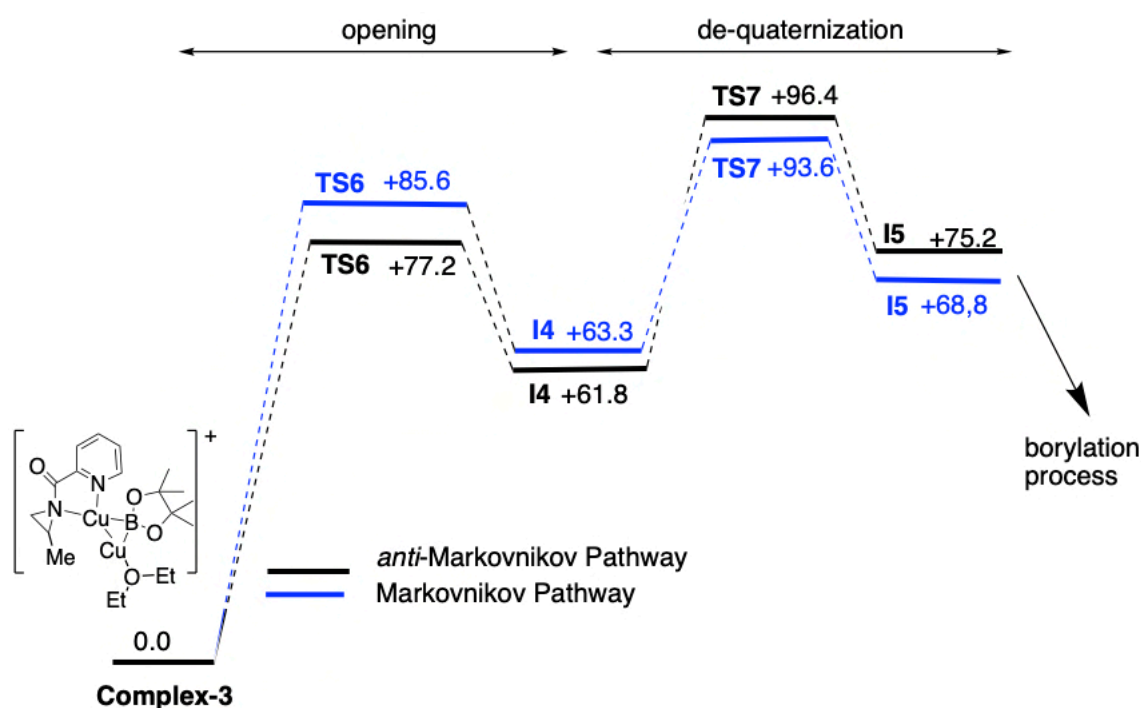

Figure S1. Particular of the reaction energy profile comparison between the *anti*-Markovnikov (blue) and Markovnikov (black) pathways of *N*-(2-picolinoyl)-methyl aziridine (model with the Et<sub>2</sub>O molecule). The  $\Delta G$  values are in kJ/mol.

Table S2. One-Copper model, *N*-(2-picolinoyl)-methyl aziridine: comparison between Free Energies obtained at different theory level.

| Structure | $\Delta G$ (kJ/mol) <sup>a</sup> | G (Hartree) <sup>a</sup> | $\Delta G$ (kJ/mol) <sup>b</sup> | G (Hartree) <sup>b</sup> |
|-----------|----------------------------------|--------------------------|----------------------------------|--------------------------|
|           | <i>Anti</i> -Markovnikov (A)     |                          | <i>Anti</i> -Markovnikov (B)     |                          |
| Complex-1 | 0,0                              | -1142,35944836           | 0,0                              | -1142.36293795           |
| TS1       | +78.7                            | -1142.32948224           | +78.8                            | -1142.33293874           |
| I1        | -10.2                            | -1142.36334256           | -9.0                             | -1142.36637520           |
| TS2       | +4.8                             | -1142.35763571           | +5,8                             | -1142.36073507           |
| P1        | -202.0                           | -1142.43640126           | -201.5                           | -1142.43967762           |
|           | Markovnikov (A)                  |                          | Markovnikov (B)                  |                          |
| TS1       | +75.2                            | -1142.33080044           | +75.4                            | -1142.33420243           |
| I1        | -7.2                             | -1142.36219417           | -5.6                             | -1142.36508446           |
| TS2       | +8.3                             | -1142.35630147           | +9.2                             | -1142.35942931           |

<sup>a</sup> (A) see Table 3 and Computational Section, main text, and Thermochemical Data, SI.

<sup>b</sup> (B) B3LYP-D3/6-311+G(2D,P)//B3LYP-D3/6-311+G(2D,P) corrected by a solvent-simulation SP at same theory level (PCM calculation)

CARTESIAN COORDINATES and THERMOCHEMICAL DATA

PRELIMINARY RESULTS (ANTIPERIPLANAR RING OPENING, REF 25, MAIN TEXT)

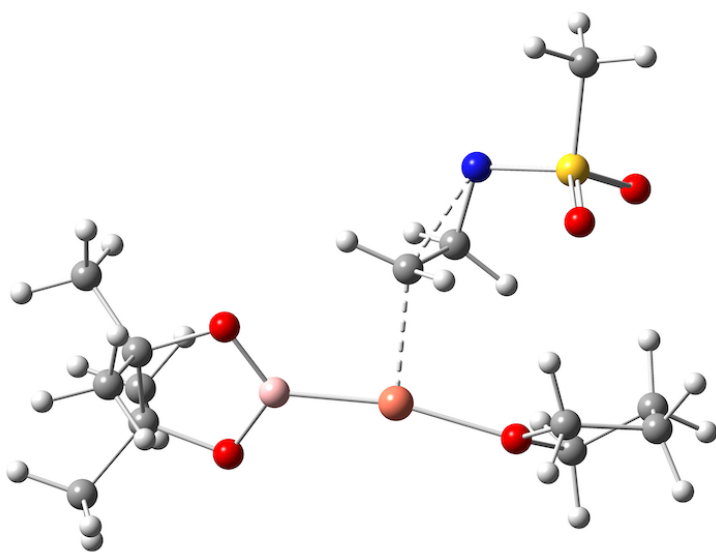

TS (Ref 25)

Substrate: mesylaziridine

CARTESIAN COORDINATES

|    |           |           |           |
|----|-----------|-----------|-----------|
| C  | -1.214511 | 1.044693  | 1.111519  |
| N  | -1.974511 | 2.155272  | 0.564555  |
| O  | -4.251355 | 1.057294  | 1.167402  |
| C  | -0.515316 | 0.947208  | -0.202602 |
| Cu | 0.309145  | -1.056888 | -0.155875 |
| B  | 2.134057  | -0.331278 | -0.106477 |
| O  | 3.183049  | -1.088144 | 0.376530  |
| O  | 2.551876  | 0.922031  | -0.509785 |
| C  | 4.350244  | -0.215069 | 0.507539  |
| C  | 4.012935  | 0.939724  | -0.501981 |
| O  | -1.379057 | -2.156960 | -0.195956 |
| C  | -2.053010 | -2.645184 | 1.000157  |
| C  | -2.323451 | -2.113699 | -1.322463 |
| C  | -3.528990 | -2.361437 | 0.748275  |
| H  | -1.839691 | -3.717683 | 1.096574  |
| H  | -1.623950 | -2.115552 | 1.854617  |
| C  | -3.654358 | -2.626467 | -0.763526 |
| H  | -2.400098 | -1.074283 | -1.643231 |
| H  | -1.905675 | -2.734477 | -2.120138 |
| H  | -3.769098 | -1.317655 | 0.974502  |
| H  | -4.179005 | -3.007328 | 1.347199  |
| H  | -4.497546 | -2.090616 | -1.207281 |
| H  | -3.774398 | -3.698618 | -0.960870 |
| H  | -1.103806 | 0.643324  | -1.065341 |
| H  | 0.273111  | 1.663075  | -0.400617 |
| H  | -1.790659 | 0.166537  | 1.418377  |
| C  | 4.480293  | 2.328638  | -0.076980 |
| H  | 5.572093  | 2.353498  | 0.024163  |
| H  | 4.190370  | 3.063124  | -0.835700 |
| H  | 4.033267  | 2.631527  | 0.872730  |
| C  | 4.463562  | 0.644438  | -1.938293 |
| H  | 4.019606  | 1.387591  | -2.608342 |
| H  | 5.553707  | 0.695762  | -2.035348 |
| H  | 4.128404  | -0.346237 | -2.261641 |
| C  | 5.601844  | -1.021460 | 0.174760  |
| H  | 6.488508  | -0.375751 | 0.179968  |
| H  | 5.745160  | -1.805530 | 0.925617  |
| H  | 5.523633  | -1.502006 | -0.803170 |
| C  | 4.389310  | 0.246729  | 1.969841  |
| H  | 4.424291  | -0.634430 | 2.618410  |
| H  | 5.271936  | 0.863530  | 2.172648  |
| H  | 3.493572  | 0.821214  | 2.226856  |
| S  | -3.490197 | 1.691519  | 0.059727  |
| C  | -4.205734 | 3.306491  | -0.282501 |
| H  | -3.595750 | 3.797393  | -1.042869 |
| H  | -5.218608 | 3.126753  | -0.650358 |
| H  | -4.220826 | 3.884116  | 0.642982  |
| O  | -3.482421 | 0.924046  | -1.218888 |
| H  | -0.562954 | 1.363892  | 1.928597  |

Electronic Energy = -1562.96129548 (Hartree/Particle)

Dipole Moment (Debye): 3.6448

index 0

Harmonic frequencies

Number of imaginary frequencies= 1

Negatives Eigenvalues: -182.255

THERMOCHEMICAL DATA

Temperature 298.150 Kelvin. Pressure 1.00000 Atm.  
 Zero-point correction= 0.409514  
 (Hartree/Particle)  
 Thermal correction to Energy= 0.435819  
 Thermal correction to Enthalpy= 0.436763  
 Thermal correction to Gibbs Free Energy= 0.349837  
 Sum of electronic and zero-point Energies= -1562.551781  
 Sum of electronic and thermal Energies= -1562.525477  
 Sum of electronic and thermal Enthalpies= -1562.524533  
 Sum of electronic and thermal Free Energies= -1562.611458  
 PCM-SP (solvent=THF;6-311+g(2d,p)) = -1563.31552956  
 Corrected Free Energy = -1562.96569208  
 Corrected Free Energy = -1533.52220177

---

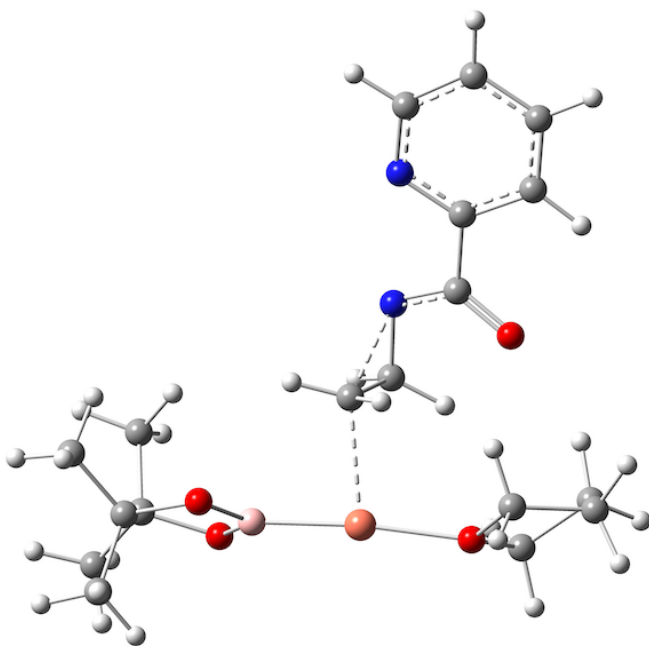

TS (Ref 25)

Substrate: N-(2picolinoyl)-aziridine

#### CARTESIAN COORDINATES

|    |           |           |           |
|----|-----------|-----------|-----------|
| C  | 0.679183  | -0.020737 | 1.429902  |
| N  | 1.673513  | -1.015347 | 1.084563  |
| C  | 2.814244  | -0.481574 | 0.541481  |
| O  | 3.039292  | 0.733514  | 0.352355  |
| C  | 0.168996  | -0.312002 | 0.069698  |
| C  | 3.885059  | -1.483858 | 0.172043  |
| C  | 5.189901  | -1.012577 | -0.044352 |
| C  | 6.187407  | -1.924605 | -0.385231 |
| C  | 5.846317  | -3.272460 | -0.514334 |
| C  | 4.514373  | -3.640683 | -0.291999 |
| N  | 3.551416  | -2.779291 | 0.049630  |
| Cu | -1.152326 | 1.511397  | -0.301088 |
| H  | 0.018884  | -0.356390 | 2.230585  |
| H  | 5.391249  | 0.048171  | 0.057719  |
| H  | 7.209061  | -1.590847 | -0.549363 |
| H  | 4.207475  | -4.680967 | -0.391907 |
| H  | 6.586457  | -4.022036 | -0.781035 |
| B  | -2.614208 | 0.214806  | -0.214424 |

|   |           |           |           |
|---|-----------|-----------|-----------|
| O | -3.455072 | 0.099943  | 0.877218  |
| O | -2.894594 | -0.739084 | -1.175497 |
| C | -4.204268 | -1.147901 | 0.742295  |
| C | -4.139800 | -1.406850 | -0.805104 |
| O | 0.203027  | 2.996973  | -0.370751 |
| C | 0.539217  | 3.761412  | 0.827362  |
| C | 1.345859  | 2.968876  | -1.288296 |
| C | 2.055714  | 3.925880  | 0.777606  |
| H | 0.008324  | 4.719116  | 0.767259  |
| H | 0.173534  | 3.200759  | 1.691568  |
| C | 2.322138  | 4.004354  | -0.735674 |
| H | 1.781201  | 1.967374  | -1.250718 |
| H | 0.960696  | 3.190260  | -2.286837 |
| H | 2.548176  | 3.039830  | 1.189318  |
| H | 2.390075  | 4.815368  | 1.320823  |
| H | 3.355349  | 3.755143  | -0.992652 |
| H | 2.093485  | 5.005193  | -1.122606 |
| H | 0.717052  | 0.059287  | -0.790464 |
| H | -0.416710 | -1.206072 | -0.093020 |
| H | 1.043791  | 0.996471  | 1.590392  |
| C | -4.043615 | -2.874649 | -1.211470 |
| H | -4.926354 | -3.428478 | -0.869034 |
| H | -3.992835 | -2.952188 | -2.302652 |
| H | -3.150403 | -3.349712 | -0.798942 |
| C | -5.263178 | -0.712656 | -1.585895 |
| H | -5.036545 | -0.768176 | -2.655494 |
| H | -6.232006 | -1.193509 | -1.409877 |
| H | -5.339883 | 0.344084  | -1.310577 |
| C | -5.606646 | -0.940774 | 1.306366  |
| H | -6.223332 | -1.833247 | 1.143707  |
| H | -5.547030 | -0.758060 | 2.384518  |
| H | -6.102841 | -0.082913 | 0.846549  |
| C | -3.451208 | -2.200060 | 1.567117  |
| H | -3.367931 | -1.846867 | 2.599930  |
| H | -3.975884 | -3.161925 | 1.569398  |
| H | -2.438452 | -2.357355 | 1.182041  |

Electronic Energy = -1335.50039192 (Hartree/Particle)

Dipole Moment (Debye): 3.1329

index 1

Number of imaginary frequencies= 1

Negatives Eigenvalues: -322.373

#### THERMOCHEMICAL DATA

Temperature 298.150 Kelvin. Pressure 1.00000 Atm.

Zero-point correction= 0.450274

(Hartree/Particle)

Thermal correction to Energy= 0.478160

Thermal correction to Enthalpy= 0.479105

Thermal correction to Gibbs Free Energy= 0.386814

Sum of electronic and zero-point Energies= -1335.050118

Sum of electronic and thermal Energies= -1335.022231

Sum of electronic and thermal Enthalpies= -1335.021287

Sum of electronic and thermal Free Energies= -1335.113582

PCM-SP (solvent=THF;6-311+g(2d,p)) = -1335.83942948

Corrected Free Energy = -1335.45261956

MODEL: Az-Cu-Bpin

SUBSTRATE: N-MESYL-AZIRIDINE

N-mesyl-aziridine

CARTESIAN COORDINATES

|   |           |           |           |
|---|-----------|-----------|-----------|
| C | 2.019232  | -0.608194 | -0.197541 |
| C | 1.912543  | 0.834411  | 0.143586  |
| H | 1.841746  | -1.321369 | 0.605557  |
| H | 2.490274  | 1.576843  | -0.400705 |
| N | 0.867954  | 0.183199  | -0.679551 |
| H | 2.675838  | -0.950295 | -0.992513 |
| H | 1.656183  | 1.079936  | 1.172243  |
| S | -0.632935 | -0.175458 | 0.087113  |
| O | -0.516997 | -0.056953 | 1.552431  |
| O | -1.124224 | -1.421630 | -0.507619 |
| C | -1.611208 | 1.205657  | -0.525850 |
| H | -2.613207 | 1.085760  | -0.106944 |
| H | -1.159879 | 2.137448  | -0.178901 |
| H | -1.633305 | 1.154043  | -1.615359 |

Electronic Energy = -721.839183223 (Hartree/Particle)

Dipole Moment (Debye): 4.0306

index 0

Harmonic frequencies

Number of imaginary frequencies= 0

THERMOCHEMICAL DATA

Temperature 298.150 Kelvin. Pressure 1.00000 Atm.

Zero-point correction= 0.108343

(Hartree/Particle)

Thermal correction to Energy= 0.115923

Thermal correction to Enthalpy= 0.116867

Thermal correction to Gibbs Free Energy= 0.076193

Sum of electronic and zero-point Energies= -721.730840

Sum of electronic and thermal Energies= -721.723260

Sum of electronic and thermal Enthalpies= -721.722316

Sum of electronic and thermal Free Energies= -721.762990

PCM-SP (solvent=THF;6-311+g(2d,p)) = -721.994189343

Corrected Free Energy = -721.917996120

-----

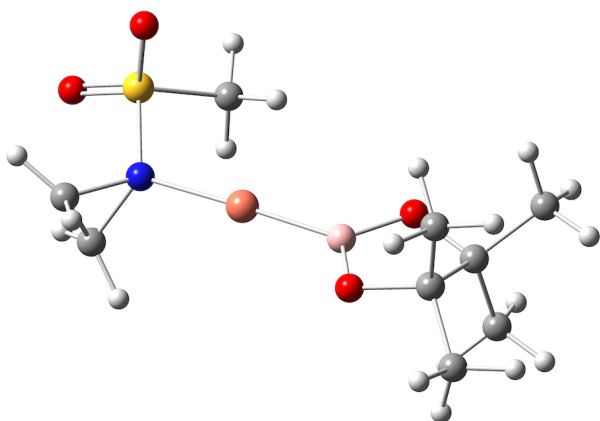

Complex-1      Substrate: N-mesyl-aziridine

# CARTESIAN COORDINATES

|    |           |           |            |
|----|-----------|-----------|------------|
| C  | -3.100354 | -1.568728 | -1 .265188 |
| C  | -3.178320 | -2.019169 | 0.144267   |
| H  | -4.025511 | -1.253842 | -1.740983  |
| H  | -2.452342 | -2.718786 | 0.546056   |
| N  | -2.591149 | -0.686416 | -0.175152  |
| Cu | -0.556083 | -0.450515 | -0.032506  |
| B  | 1.385038  | -0.194298 | -0.014723  |
| O  | 2.332615  | -1.200985 | 0.123822   |
| O  | 2.005551  | 1.045201  | -0.138632  |
| C  | 3.637505  | -0.587854 | 0.328979   |
| C  | 3.437797  | 0.835758  | -0.300255  |
| C  | 4.698647  | -1.452060 | -0.348108  |
| H  | 5.684615  | -0.974700 | -0.286373  |
| H  | 4.757010  | -2.423809 | 0.153952   |
| H  | 4.460869  | -1.631219 | -1.399420  |
| C  | 3.877354  | -0.552881 | 1.845055   |
| H  | 3.803662  | -1.572437 | 2.237310   |
| H  | 4.869997  | -0.156758 | 2.088478   |
| H  | 3.120972  | 0.057707  | 2.348328   |
| C  | 3.724557  | 0.878773  | -1.808060  |
| H  | 3.372439  | 1.835821  | -2.207054  |
| H  | 4.796255  | 0.787138  | -2.019052  |
| H  | 3.192837  | 0.077670  | -2.331431  |
| C  | 4.182961  | 1.966174  | 0.405550   |
| H  | 5.266108  | 1.793554  | 0.377232   |
| H  | 3.974860  | 2.916050  | -0.098864  |
| H  | 3.870605  | 2.064133  | 1.447910   |
| H  | -2.311039 | -1.932680 | -1.916104  |
| H  | -4.155348 | -2.014541 | 0.621821   |
| S  | -3.609941 | 0.679444  | 0.291328   |
| O  | -3.440866 | 0.834826  | 1.734529   |
| O  | -4.945908 | 0.483484  | -0.290023  |
| C  | -2.762778 | 2.006827  | -0.579610  |
| H  | -3.330463 | 2.916954  | -0.368970  |
| H  | -1.741757 | 2.076447  | -0.197031  |
| H  | -2.770813 | 1.782280  | -1.648044  |

Electronic Energy = -1330.51255415 (Hartree/Particle)

Dipole Moment (Debye): 3.2042

index 0

Harmonic frequencies

Number of imaginary frequencies= 0

# THERMOCHEMICAL DATA

Temperature 298.150 Kelvin. Pressure 1.00000 Atm.  
 Zero-point correction= 0.291959  
 (Hartree/Particle)  
 Thermal correction to Energy= 0.312198  
 Thermal correction to Enthalpy= 0.313143  
 Thermal correction to Gibbs Free Energy= 0.240581  
 Sum of electronic and zero-point Energies= -1330.220595  
 Sum of electronic and thermal Energies= -1330.200356  
 Sum of electronic and thermal Enthalpies= -1330.199412  
 Sum of electronic and thermal Free Energies= -1330.271973  
 PCM-SP (solvent=THF;6-311+g(2d,p)) = -1330.79867657  
 Corrected Free Energy = -1330.55809542

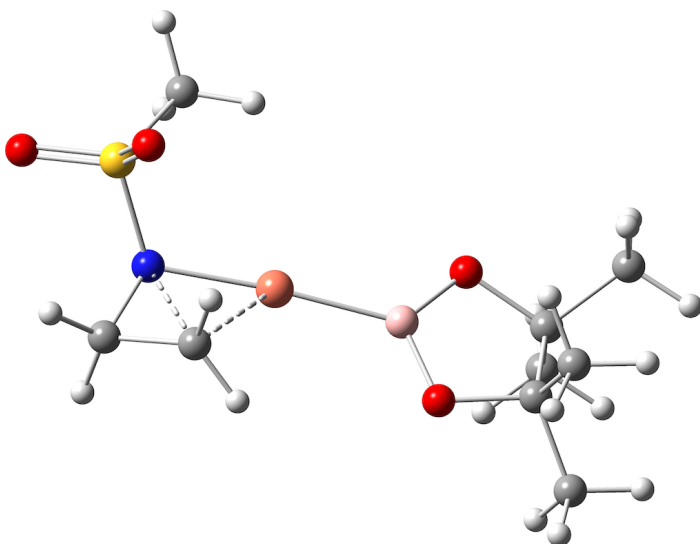

TS1 Substrate: N-mesyl-aziridine

## CARTESIAN COORDINATES

|    |           |           |           |
|----|-----------|-----------|-----------|
| Cu | -0.660995 | -0.149623 | -0.420382 |
| B  | 1.299961  | 0.010456  | -0.191299 |
| O  | 2.033328  | 1.184527  | -0.116695 |
| C  | 3.452580  | 0.849631  | -0.155559 |
| C  | 4.211526  | 1.827197  | 0.738111  |
| N  | -2.563877 | -0.442353 | -0.687457 |
| C  | -1.787653 | -1.953704 | 0.260251  |
| C  | -2.932729 | -1.881900 | -0.663351 |
| O  | 2.127825  | -1.097967 | -0.060054 |
| C  | 3.455758  | -0.641393 | 0.335780  |
| C  | 3.531971  | -0.778077 | 1.862646  |
| C  | 4.500518  | -1.538058 | -0.323416 |
| C  | 3.903688  | 1.010113  | -1.613899 |
| H  | -3.922623 | -2.094645 | -0.254542 |
| H  | -1.976254 | -1.775610 | 1.314097  |
| H  | -0.855332 | -2.439626 | -0.020197 |
| H  | 5.512803  | -1.170383 | -0.114819 |
| H  | 4.417767  | -2.554953 | 0.075146  |
| H  | 4.362388  | -1.588856 | -1.406018 |
| H  | 3.328405  | -1.818874 | 2.135154  |

|   |           |           |           |
|---|-----------|-----------|-----------|
| H | 4.523301  | -0.507101 | 2.243222  |
| H | 2.783073  | -0.147298 | 2.352129  |
| H | 3.683298  | 2.031338  | -1.941247 |
| H | 4.979548  | 0.833509  | -1.725502 |
| H | 3.363911  | 0.320829  | -2.271069 |
| H | 5.271849  | 1.552443  | 0.799171  |
| H | 4.143645  | 2.837088  | 0.319736  |
| H | 3.797433  | 1.853742  | 1.748816  |
| H | -2.801217 | -2.334724 | -1.646042 |
| S | -3.666953 | 0.492911  | 0.271291  |
| O | -3.604330 | 0.093053  | 1.688146  |
| O | -4.960063 | 0.449174  | -0.425343 |
| C | -2.943080 | 2.131224  | 0.084598  |
| H | -1.951841 | 2.132795  | 0.545568  |
| H | -2.887920 | 2.367472  | -0.979050 |
| H | -3.614362 | 2.819040  | 0.605163  |

Electronic Energy = -1330.47537013 (Hartree/Particle)

Dipole Moment (Debye): 2.6389

index 1

Number of imaginary frequencies= 1

Negatives Eigenvalues: -276.427

#### THERMOCHEMICAL DATA

Temperature 298.150 Kelvin. Pressure 1.00000 Atm.

Zero-point correction= 0.289830

(Hartree/Particle)

Thermal correction to Energy= 0.309650

Thermal correction to Enthalpy= 0.310595

Thermal correction to Gibbs Free Energy= 0.239583

Sum of electronic and zero-point Energies= -1330.185540

Sum of electronic and thermal Energies= -1330.165720

Sum of electronic and thermal Enthalpies= -1330.164775

Sum of electronic and thermal Free Energies= -1330.235787

PCM-SP (solvent=THF;6-311+g(2d,p)) = -1330.761392330

Corrected Free Energy = -1330.521809200

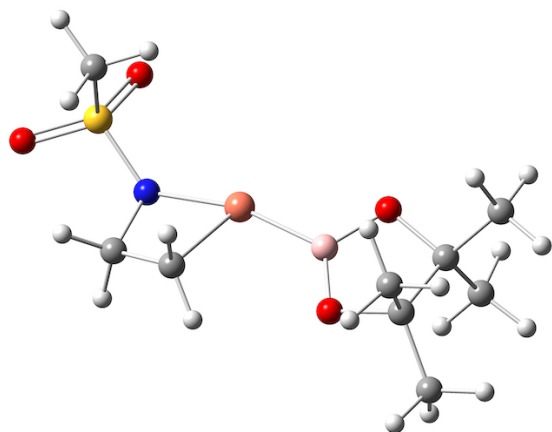

I1 Substrate: N-mesyl-aziridine

#### CARTESIAN COORDINATES

|    |           |           |           |
|----|-----------|-----------|-----------|
| Cu | 0.642652  | -0.143437 | -0.284199 |
| B  | -1.318963 | -0.028205 | -0.098457 |

|   |           |           |           |
|---|-----------|-----------|-----------|
| O | -2.123989 | 1.071973  | -0.216555 |
| C | -3.479553 | 0.665147  | 0.178271  |
| C | -4.481727 | 1.407347  | -0.698874 |
| N | 2.479654  | 0.228452  | -0.604136 |
| C | 2.260502  | 1.700584  | -0.512522 |
| C | 0.863760  | 1.780693  | 0.078729  |
| O | -2.004528 | -1.187310 | 0.154002  |
| C | -3.435599 | -0.893374 | -0.034850 |
| C | -3.780877 | -1.326350 | -1.463385 |
| C | -4.231299 | -1.708325 | 0.978177  |
| C | -3.643476 | 1.076525  | 1.645567  |
| H | 2.997709  | 2.202185  | 0.130747  |
| H | -5.501667 | 1.064341  | -0.488664 |
| H | -4.432183 | 2.480641  | -0.488478 |
| H | -4.274878 | 1.261397  | -1.761381 |
| H | -3.467192 | 2.153160  | 1.734384  |
| H | -4.653196 | 0.859487  | 2.010040  |
| H | -2.922141 | 0.559254  | 2.286405  |
| H | -3.531360 | -2.385054 | -1.583535 |
| H | -4.848189 | -1.195102 | -1.671485 |
| H | -3.207821 | -0.756894 | -2.202082 |
| H | -5.295452 | -1.449111 | 0.924706  |
| H | -4.127488 | -2.775078 | 0.755831  |
| H | -3.880232 | -1.540237 | 1.998739  |
| H | 0.801645  | 1.838354  | 1.166847  |
| H | 0.086395  | 2.354877  | -0.422539 |
| H | 2.320795  | 2.153528  | -1.507103 |
| S | 3.882980  | -0.385196 | -0.002809 |
| C | 3.741918  | -0.322673 | 1.810577  |
| H | 2.906476  | -0.957016 | 2.115934  |
| H | 4.680153  | -0.698202 | 2.227139  |
| H | 3.583609  | 0.713549  | 2.121326  |
| O | 3.920429  | -1.810572 | -0.367094 |
| O | 5.002559  | 0.513802  | -0.348982 |

Electronic Energy = -1330.48570273 (Hartree/Particle)

Dipole Moment (Debye): 10.8658

index 0

Harmonic frequencies

Number of imaginary frequencies= 0

#### THERMOCHEMICAL DATA

Temperature 298.150 Kelvin. Pressure 1.00000 Atm.

Zero-point correction= 0.290784

(Hartree/Particle)

Thermal correction to Energy= 0.310947

Thermal correction to Enthalpy= 0.311891

Thermal correction to Gibbs Free Energy= 0.240029

Sum of electronic and zero-point Energies= -1330.194918

Sum of electronic and thermal Energies= -1330.174756

Sum of electronic and thermal Enthalpies= -1330.173812

Sum of electronic and thermal Free Energies= -1330.245674

PCM-SP (solvent=THF;6-311+g(2d,p)) = -1330.78025244

Corrected Free Energy = -1330.54022371

-----

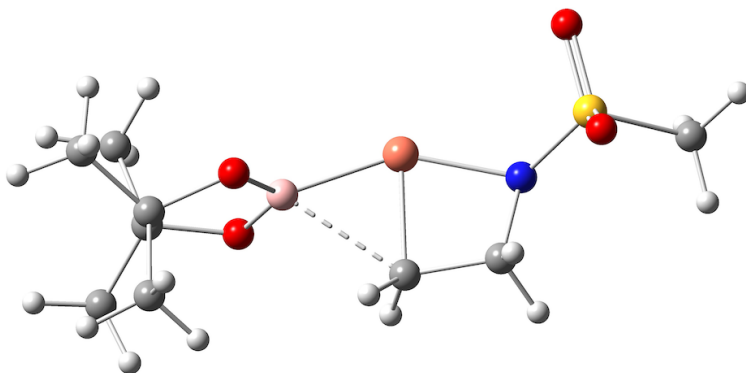

TS2 Substrate: N-mesyl-aziridine

# CARTESIAN COORDINATES

|    |           |           |           |
|----|-----------|-----------|-----------|
| Cu | -0.648959 | -0.378699 | 0.061505  |
| B  | 1.311276  | -0.149153 | -0.008806 |
| O  | 1.968780  | 0.981073  | -0.414033 |
| C  | 3.384473  | 0.621264  | -0.579362 |
| C  | 4.236664  | 1.814397  | -0.161214 |
| N  | -2.467881 | -0.226409 | 0.601905  |
| C  | -2.165880 | 0.959099  | 1.453407  |
| C  | -0.754910 | 1.336549  | 1.028064  |
| O  | 2.142278  | -1.180890 | 0.329633  |
| C  | 3.514514  | -0.646238 | 0.344294  |
| C  | 3.826337  | -0.309163 | 1.806092  |
| C  | 4.459173  | -1.726827 | -0.168451 |
| C  | 3.583757  | 0.315881  | -2.067892 |
| H  | -2.861526 | 1.794319  | 1.284704  |
| H  | 5.301006  | 1.552846  | -0.190205 |
| H  | 4.070415  | 2.646673  | -0.852734 |
| H  | 3.987913  | 2.156606  | 0.845907  |
| H  | 3.283850  | 1.190726  | -2.653167 |
| H  | 4.632098  | 0.091357  | -2.291418 |
| H  | 2.969395  | -0.532495 | -2.386048 |
| H  | 3.699572  | -1.210549 | 2.413424  |
| H  | 4.855864  | 0.046441  | 1.921473  |
| H  | 3.147123  | 0.458178  | 2.191697  |
| H  | 5.479782  | -1.334308 | -0.250050 |
| H  | 4.471006  | -2.568322 | 0.531493  |
| H  | 4.149670  | -2.104738 | -1.145331 |
| H  | -0.659489 | 2.066483  | 0.222988  |
| H  | 0.011396  | 1.457678  | 1.792705  |
| H  | -2.221700 | 0.687234  | 2.512417  |
| S  | -3.901763 | -0.259643 | -0.197900 |
| C  | -3.766099 | 0.937889  | -1.562391 |
| H  | -2.967244 | 0.611812  | -2.232578 |
| H  | -4.724875 | 0.950453  | -2.087157 |
| H  | -3.553130 | 1.927994  | -1.150385 |
| O  | -4.016529 | -1.587210 | -0.823634 |
| O  | -4.971093 | 0.257242  | 0.680590  |

Electronic Energy = -1330.48452246 (Hartree/Particle)

Dipole Moment (Debye): 11.2461

index 0

Harmonic frequencies

Number of imaginary frequencies= 1

Negatives Eigenvalues: -16.336

#### THERMOCHEMICAL DATA

Temperature 298.150 Kelvin. Pressure 1.00000 Atm.  
Zero-point correction= 0.290658  
(Hartree/Particle)  
Thermal correction to Energy= 0.309967  
Thermal correction to Enthalpy= 0.310911  
Thermal correction to Gibbs Free Energy= 0.242113  
Sum of electronic and zero-point Energies= -1330.193864  
Sum of electronic and thermal Energies= -1330.174555  
Sum of electronic and thermal Enthalpies= -1330.173611  
Sum of electronic and thermal Free Energies= -1330.242409  
PCM-SP (solvent=THF;6-311+g(2d,p)) = -1330.78049149  
Corrected Free Energy = -1330.53837803

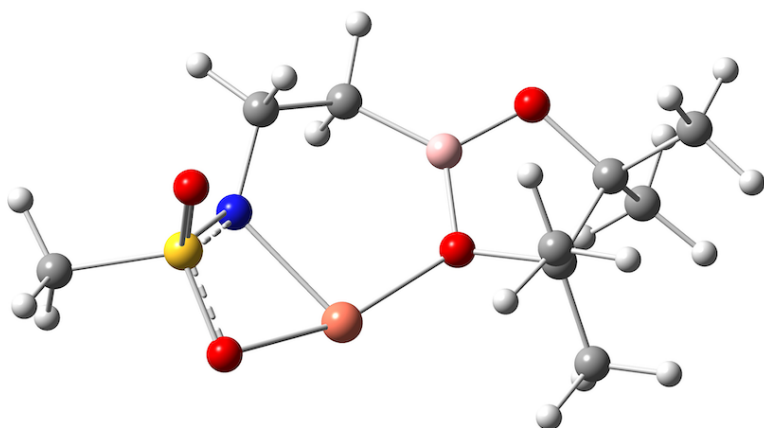

P1 Substrate: N-mesyl-aziridine

#### CARTESIAN COORDINATES

|    |           |           |           |
|----|-----------|-----------|-----------|
| C  | -1.353679 | 2.049226  | 0.012723  |
| Cu | -0.739178 | -0.987884 | -0.562338 |
| B  | 1.168639  | 1.227236  | -0.290043 |
| O  | 1.082040  | -0.171239 | -0.459895 |
| C  | 2.255803  | -0.784976 | 0.204661  |
| C  | 2.634011  | -2.035222 | -0.576005 |
| C  | 0.039774  | 2.268621  | -0.627333 |
| N  | -1.903204 | 0.794614  | -0.505440 |
| O  | 2.407379  | 1.569987  | 0.172353  |
| C  | 3.278929  | 0.399432  | 0.140476  |
| C  | 4.052670  | 0.461760  | -1.181483 |
| C  | 4.236591  | 0.474666  | 1.325270  |
| C  | 1.811399  | -1.141164 | 1.625236  |
| H  | -1.991735 | 2.907352  | -0.251024 |
| H  | -0.097478 | 2.271688  | -1.720312 |
| H  | 0.409859  | 3.266655  | -0.358244 |
| H  | 4.846206  | -0.434516 | 1.384539  |
| H  | 4.907927  | 1.329916  | 1.199169  |
| H  | 3.701094  | 0.601908  | 2.268663  |
| H  | 4.590671  | 1.413308  | -1.231154 |
| H  | 4.780070  | -0.353497 | -1.256333 |
| H  | 3.376737  | 0.408229  | -2.041205 |
| H  | 0.945891  | -1.811251 | 1.574082  |

|   |           |           |           |
|---|-----------|-----------|-----------|
| H | 2.611248  | -1.651308 | 2.171292  |
| H | 1.513226  | -0.250583 | 2.186633  |
| H | 3.543009  | -2.483596 | -0.159816 |
| H | 1.825147  | -2.770827 | -0.500054 |
| H | 2.799057  | -1.819522 | -1.633817 |
| H | -1.268499 | 2.037713  | 1.108990  |
| S | -3.005568 | -0.008979 | 0.330010  |
| C | -4.639454 | 0.218086  | -0.413979 |
| H | -4.566249 | -0.034446 | -1.473236 |
| H | -5.341973 | -0.442124 | 0.100173  |
| H | -4.927480 | 1.263587  | -0.278981 |
| O | -2.670392 | -1.472169 | 0.009188  |
| O | -3.137591 | 0.346241  | 1.761999  |

Electronic Energy = -1330.56983965 (Hartree/Particle)

Dipole Moment (Debye): 6.4223

index 0

Harmonic frequencies

Number of imaginary frequencies= 0

#### THERMOCHEMICAL DATA

Temperature 298.150 Kelvin. Pressure 1.00000 Atm.

Zero-point correction= 0.292852

(Hartree/Particle)

Thermal correction to Energy= 0.312324

Thermal correction to Enthalpy= 0.313268

Thermal correction to Gibbs Free Energy= 0.245148

Sum of electronic and zero-point Energies= -1330.276988

Sum of electronic and thermal Energies= -1330.257516

Sum of electronic and thermal Enthalpies= -1330.256572

Sum of electronic and thermal Free Energies= -1330.324692

PCM-SP (solvent=THF;6-311+g(2d,p)) = -1330.85610185

Corrected Free Energy = -1330.61095420

-----

SUBSTRATE: N-TOSYL-AZIRIDINE

N-tosyl-aziridine

#### CARTESIAN COORDINATES

|   |           |           |           |
|---|-----------|-----------|-----------|
| C | -3.081264 | -0.437755 | -0.877590 |
| C | -2.067213 | -1.522640 | -0.958585 |
| H | -3.581488 | -0.301747 | 0.079509  |
| H | -1.867585 | -2.031399 | -1.897930 |
| N | -1.641945 | -0.107525 | -0.954165 |
| H | -3.644443 | -0.129452 | -1.753980 |
| H | -1.896401 | -2.100761 | -0.052647 |
| S | -0.947445 | 0.498482  | 0.502044  |
| O | -1.372423 | -0.315244 | 1.656589  |
| O | -1.183403 | 1.944701  | 0.487712  |
| C | 0.783745  | 0.168579  | 0.178296  |
| C | 1.490678  | 1.044498  | -0.649247 |
| C | 1.384016  | -0.953505 | 0.752218  |
| C | 2.834768  | 0.778364  | -0.913606 |
| H | 0.994720  | 1.915176  | -1.066026 |
| C | 2.731073  | -1.206576 | 0.480574  |

|   |          |           |           |
|---|----------|-----------|-----------|
| H | 0.808925 | -1.598341 | 1.408821  |
| C | 3.452242 | -0.345059 | -0.351653 |
| H | 3.400998 | 1.449837  | -1.553076 |
| H | 3.216134 | -2.072025 | 0.923554  |
| H | 4.500211 | -0.545415 | -0.558632 |

Electronic Energy = -913.586590503 (Hartree/Particle)  
 Dipole Moment (Debye): 4.6379  
 index 0  
 Harmonic frequencies  
 Number of imaginary frequencies= 0

#### THERMOCHEMICAL DATA

Temperature 298.150 Kelvin. Pressure 1.00000 Atm.  
 Zero-point correction= 0.161572  
 (Hartree/Particle)  
 Thermal correction to Energy= 0.172181  
 Thermal correction to Enthalpy= 0.173125  
 Thermal correction to Gibbs Free Energy= 0.123997  
 Sum of electronic and zero-point Energies= -913.425019  
 Sum of electronic and thermal Energies= -913.414409  
 Sum of electronic and thermal Enthalpies= -913.413465  
 Sum of electronic and thermal Free Energies= -913.462594  
 PCM-SP (solvent=THF;6-311+g(2d,p)) = -913.784535565  
 Corrected Free Energy = -913.660539062

-----  
 Complex-1 Substrate: N-tosyl-aziridine

#### CARTESIAN COORDINATES

|    |           |           |           |
|----|-----------|-----------|-----------|
| C  | -2.852053 | -1.808241 | -1.619934 |
| C  | -2.826559 | -2.803543 | -0.520288 |
| H  | -3.801741 | -1.322090 | -1.827468 |
| H  | -2.102167 | -3.611929 | -0.517046 |
| N  | -2.208606 | -1.463488 | -0.323723 |
| Cu | -0.172070 | -1.225181 | -0.267445 |
| B  | 1.708918  | -0.697944 | -0.149375 |
| O  | 2.840373  | -1.348321 | -0.621995 |
| O  | 2.068563  | 0.502132  | 0.473050  |
| C  | 4.022534  | -0.675170 | -0.105207 |
| C  | 3.476038  | 0.761399  | 0.210114  |
| C  | 5.122282  | -0.731153 | -1.163029 |
| H  | 6.000665  | -0.158159 | -0.840451 |
| H  | 5.430190  | -1.770688 | -1.318491 |
| H  | 4.778187  | -0.336543 | -2.122113 |
| C  | 4.459759  | -1.445136 | 1.149143  |
| H  | 4.631846  | -2.491728 | 0.877702  |
| H  | 5.385531  | -1.038057 | 1.572083  |
| H  | 3.679881  | -1.419868 | 1.916834  |
| C  | 3.533714  | 1.710715  | -0.995651 |
| H  | 2.959181  | 2.613835  | -0.762788 |
| H  | 4.562697  | 2.006133  | -1.230870 |
| H  | 3.088236  | 1.246757  | -1.881276 |
| C  | 4.090855  | 1.434491  | 1.434991  |
| H  | 5.172419  | 1.564849  | 1.304979  |
| H  | 3.643564  | 2.424817  | 1.576388  |
| H  | 3.914362  | 0.853837  | 2.343464  |

|   |           |           |           |
|---|-----------|-----------|-----------|
| H | -2.145809 | -1.872460 | -2.442165 |
| H | -3.758110 | -2.988981 | 0.009102  |
| S | -3.113249 | -0.382635 | 0.757483  |
| O | -2.673871 | -0.746714 | 2.103055  |
| O | -4.531426 | -0.449363 | 0.373658  |
| C | -2.428935 | 1.192434  | 0.272627  |
| C | -3.141032 | 1.991903  | -0.626132 |
| C | -1.168817 | 1.553033  | 0.761082  |
| C | -2.563987 | 3.191451  | -1.047850 |
| H | -4.122413 | 1.683450  | -0.971340 |
| C | -0.600466 | 2.746997  | 0.315251  |
| H | -0.633789 | 0.914358  | 1.454892  |
| C | -1.295957 | 3.561909  | -0.583246 |
| H | -3.102297 | 3.832796  | -1.739970 |
| H | 0.391833  | 3.017193  | 0.661107  |
| H | -0.847979 | 4.490613  | -0.926837 |

Electronic Energy = -1522.26036101 (Hartree/Particle)

Dipole Moment (Debye): 4.0242

index 0

Harmonic frequencies

Number of imaginary frequencies= 0

#### THERMOCHEMICAL DATA

Temperature 298.150 Kelvin. Pressure 1.00000 Atm.

Zero-point correction= 0.345112

(Hartree/Particle)

Thermal correction to Energy= 0.368409

Thermal correction to Enthalpy= 0.369353

Thermal correction to Gibbs Free Energy= 0.289816

Sum of electronic and zero-point Energies= -1521.915249

Sum of electronic and thermal Energies= -1521.891952

Sum of electronic and thermal Enthalpies= -1521.891008

Sum of electronic and thermal Free Energies= -1521.970545

PCM-SP (solvent=THF;6-311+g(2d,p)) = -1522.590872550

Corrected Free Energy = -1522.301056540

-----  
TS1 Substrate: N-tosyl-aziridine

#### CARTESIAN COORDINATES

|    |           |           |           |
|----|-----------|-----------|-----------|
| Cu | -0.332187 | -0.913672 | -0.480565 |
| B  | 1.590291  | -0.479914 | -0.263171 |
| O  | 2.045575  | 0.728972  | 0.256381  |
| C  | 3.492711  | 0.788054  | 0.098553  |
| C  | 4.086825  | 1.528040  | 1.294529  |
| N  | -2.215322 | -1.373741 | -0.655081 |
| C  | -1.271629 | -2.769831 | 0.316371  |
| C  | -2.491312 | -2.825039 | -0.509216 |
| O  | 2.659761  | -1.319073 | -0.547398 |
| C  | 3.876498  | -0.730221 | -0.003191 |
| C  | 4.114009  | -1.388816 | 1.363062  |
| C  | 5.037713  | -1.042713 | -0.943675 |
| C  | 3.765304  | 1.571559  | -1.193129 |
| H  | -3.425512 | -3.069313 | 0.000327  |
| H  | -1.392651 | -2.558949 | 1.373861  |
| H  | -0.340272 | -3.221803 | -0.016503 |

|   |           |           |           |
|---|-----------|-----------|-----------|
| H | 5.953868  | -0.540971 | -0.608161 |
| H | 5.223284  | -2.122113 | -0.953989 |
| H | 4.821103  | -0.729727 | -1.967756 |
| H | 4.174743  | -2.473507 | 1.226446  |
| H | 5.047707  | -1.043810 | 1.821760  |
| H | 3.287006  | -1.179709 | 2.049338  |
| H | 3.291124  | 2.555558  | -1.116088 |
| H | 4.838946  | 1.714771  | -1.360511 |
| H | 3.338819  | 1.058751  | -2.061000 |
| H | 5.182977  | 1.516698  | 1.252677  |
| H | 3.756586  | 2.572573  | 1.282570  |
| H | 3.768235  | 1.084919  | 2.241186  |
| H | -2.413365 | -3.333595 | -1.470329 |
| S | -3.286090 | -0.425381 | 0.337747  |
| O | -3.225145 | -0.891615 | 1.734652  |
| O | -4.575537 | -0.407860 | -0.365845 |
| C | -2.501524 | 1.177580  | 0.201512  |
| C | -2.925215 | 2.054418  | -0.798743 |
| C | -1.434356 | 1.477460  | 1.053542  |
| C | -2.250382 | 3.268210  | -0.947621 |
| H | -3.758893 | 1.784722  | -1.438700 |
| C | -0.760412 | 2.687151  | 0.881711  |
| H | -1.131499 | 0.774477  | 1.822032  |
| C | -1.168646 | 3.578322  | -0.115458 |
| H | -2.564474 | 3.966409  | -1.718421 |
| H | 0.092252  | 2.917216  | 1.512113  |
| H | -0.638069 | 4.517298  | -0.248814 |

Electronic Energy = -1522.22116686 (Hartree/Particle)

Dipole Moment (Debye): 3.2788

index 1

Number of imaginary frequencies= 1

Negatives Eigenvalues: -277.345

#### THERMOCHEMICAL DATA

Temperature 298.150 Kelvin. Pressure 1.00000 Atm.

Zero-point correction= 0.342780

(Hartree/Particle)

Thermal correction to Energy= 0.365792

Thermal correction to Enthalpy= 0.366736

Thermal correction to Gibbs Free Energy= 0.287514

Sum of electronic and zero-point Energies= -1521.878387

Sum of electronic and thermal Energies= -1521.855375

Sum of electronic and thermal Enthalpies= -1521.854431

Sum of electronic and thermal Free Energies= -1521.933653

PCM-SP (solvent=THF;6-311+g(2d,p)) = -1522.55292705

Corrected Free Energy = -1522.26541319

-----  
I1 Substrate: N-tosyl-aziridine

#### CARTESIAN COORDINATES

|    |           |           |           |
|----|-----------|-----------|-----------|
| Cu | -0.146098 | -1.138052 | -0.149097 |
| B  | 1.729532  | -0.540415 | -0.013173 |
| O  | 2.523558  | -0.491431 | 1.101594  |
| C  | 3.739188  | 0.247920  | 0.739655  |

|   |           |           |           |
|---|-----------|-----------|-----------|
| C | 4.919588  | -0.364760 | 1.485274  |
| N | -1.948906 | -1.722963 | 0.167552  |
| C | -1.757361 | -1.604615 | 1.650124  |
| C | -0.499336 | -0.768556 | 1.756013  |
| O | 2.354084  | -0.092061 | -1.148970 |
| C | 3.779221  | 0.078279  | -0.823831 |
| C | 4.485209  | -1.201821 | -1.282825 |
| C | 4.306729  | 1.284466  | -1.592591 |
| C | 3.512551  | 1.695524  | 1.190476  |
| H | -2.614919 | -1.133541 | 2.148363  |
| H | 5.857480  | 0.110598  | 1.174372  |
| H | 4.797457  | -0.207459 | 2.561877  |
| H | 4.995783  | -1.439812 | 1.307493  |
| H | 3.300054  | 1.703521  | 2.264217  |
| H | 4.397722  | 2.314115  | 1.007489  |
| H | 2.658685  | 2.143468  | 0.671908  |
| H | 4.294105  | -1.349447 | -2.350243 |
| H | 5.567787  | -1.136083 | -1.129488 |
| H | 4.108368  | -2.078407 | -0.746238 |
| H | 5.344417  | 1.495341  | -1.307523 |
| H | 4.282827  | 1.075903  | -2.666979 |
| H | 3.704176  | 2.176675  | -1.408066 |
| H | -0.643031 | 0.313260  | 1.755771  |
| H | 0.339531  | -1.099805 | 2.365551  |
| H | -1.629207 | -2.606899 | 2.068298  |
| S | -3.254256 | -0.931266 | -0.468436 |
| O | -3.251974 | -1.218746 | -1.910731 |
| O | -4.450196 | -1.179695 | 0.359206  |
| C | -2.860913 | 0.828764  | -0.279550 |
| C | -3.341227 | 1.535719  | 0.824854  |
| C | -1.984315 | 1.424356  | -1.194172 |
| C | -2.918984 | 2.854529  | 1.026168  |
| H | -4.044066 | 1.058293  | 1.500572  |
| C | -1.566380 | 2.739755  | -0.983828 |
| H | -1.651734 | 0.862194  | -2.062510 |
| C | -2.028323 | 3.453394  | 0.129241  |
| H | -3.291079 | 3.414418  | 1.880352  |
| H | -0.888893 | 3.209798  | -1.691969 |
| H | -1.703505 | 4.478183  | 0.289697  |

Electronic Energy = -1522.23482096 (Hartree/Particle)

Dipole Moment (Debye): 10.8657

index 0

Harmonic frequencies

Number of imaginary frequencies= 0

#### THERMOCHEMICAL DATA

Temperature 298.150 Kelvin. Pressure 1.00000 Atm.

Zero-point correction= 0.344144

(Hartree/Particle)

Thermal correction to Energy= 0.367282

Thermal correction to Enthalpy= 0.368227

Thermal correction to Gibbs Free Energy= 0.288094

Sum of electronic and zero-point Energies= -1521.890677

Sum of electronic and thermal Energies= -1521.867539

Sum of electronic and thermal Enthalpies= -1521.866594

Sum of electronic and thermal Free Energies= -1521.946726

PCM-SP (solvent=THF;6-311+g(2d,p)) = -1522.57473379

Corrected Free Energy = -1522.28663883

-----  
SUBSTRATE: N-(2-PICOLINOYL)-AZIRIDINE

N-(2-picolinoyl)-aziridine

CARTESIAN COORDINATES

|   |           |           |           |
|---|-----------|-----------|-----------|
| C | -3.256706 | -0.213857 | 0.114189  |
| C | -2.299273 | -1.355547 | 0.337341  |
| H | -3.453074 | 0.470213  | 0.938665  |
| H | -1.850832 | -1.460163 | 1.323339  |
| H | -2.405086 | -2.282572 | -0.220964 |
| N | -1.922587 | -0.193835 | -0.443387 |
| C | -0.969823 | 0.757536  | -0.137435 |
| C | 0.459104  | 0.271375  | -0.075166 |
| C | 1.476976  | 1.222972  | 0.071304  |
| C | 2.797611  | 0.780803  | 0.131453  |
| H | 1.214297  | 2.273506  | 0.131456  |
| C | 1.963234  | -1.459467 | -0.088757 |
| C | 3.050316  | -0.589668 | 0.049367  |
| H | 3.613065  | 1.491068  | 0.239930  |
| H | 2.120886  | -2.534648 | -0.152690 |
| H | 4.062585  | -0.981700 | 0.091817  |
| O | -1.244142 | 1.945106  | 0.001024  |
| N | 0.692381  | -1.049127 | -0.152119 |
| H | -4.065895 | -0.320708 | -0.604978 |

Electronic Energy = -494.386797421 (Hartree/Particle)

Dipole Moment (Debye): 3.1534

index 0

Harmonic frequencies

Number of imaginary frequencies= 0

THERMOCHEMICAL DATA

Temperature 298.150 Kelvin. Pressure 1.00000 Atm.

Zero-point correction= 0.149540  
(Hartree/Particle)

Thermal correction to Energy= 0.158597

Thermal correction to Enthalpy= 0.159541

Thermal correction to Gibbs Free Energy= 0.114419

Sum of electronic and zero-point Energies= -494.237257

Sum of electronic and thermal Energies= -494.228201

Sum of electronic and thermal Enthalpies= -494.227257

Sum of electronic and thermal Free Energies= -494.272378

PCM-SP (solvent=THF;6-311+g(2d,p)) = -494.520574019

Corrected Free Energy = -494.406154598

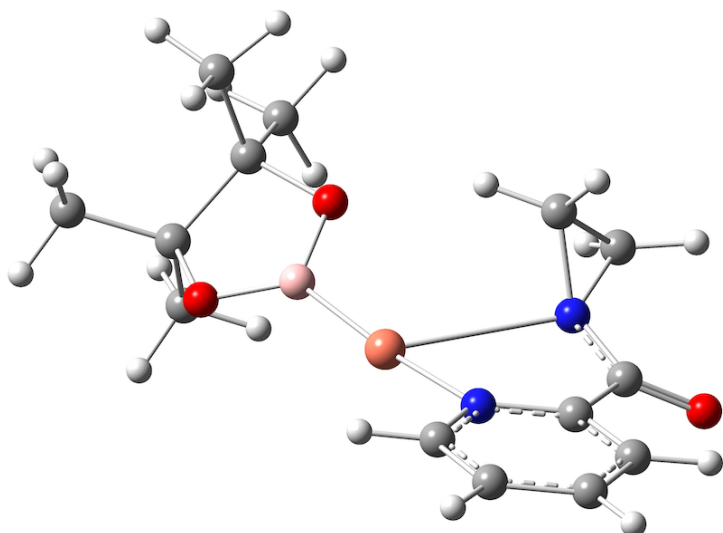

Complex-1      Substrate: N-(2-picolinoyl)-aziridine

# CARTESIAN COORDINATES

|    |           |           |           |
|----|-----------|-----------|-----------|
| C  | 1.073592  | 3.121071  | 0.030476  |
| C  | 0.967944  | 2.077211  | 1.102678  |
| H  | 1.829370  | 3.899325  | 0.122055  |
| H  | 1.661810  | 2.137183  | 1.939928  |
| H  | 0.010477  | 1.599264  | 1.294885  |
| N  | 1.554787  | 1.777761  | -0.212130 |
| C  | 2.881065  | 1.498872  | -0.469347 |
| C  | 3.342295  | 0.097202  | -0.134153 |
| C  | 4.718755  | -0.127709 | -0.034222 |
| C  | 5.181525  | -1.408430 | 0.261987  |
| H  | 5.393238  | 0.705256  | -0.197985 |
| C  | 2.895256  | -2.132689 | 0.310473  |
| C  | 4.250197  | -2.432713 | 0.438812  |
| H  | 6.246723  | -1.603245 | 0.349268  |
| H  | 2.134557  | -2.898672 | 0.426923  |
| H  | 4.558342  | -3.448364 | 0.666356  |
| O  | 3.652619  | 2.287585  | -1.003560 |
| N  | 2.438565  | -0.896008 | 0.032862  |
| Cu | 0.426010  | -0.740512 | -0.126889 |
| B  | -1.525247 | -0.541938 | -0.091173 |
| O  | -2.101551 | 0.650941  | 0.372091  |
| O  | -2.526913 | -1.425604 | -0.476901 |
| C  | -3.538711 | 0.464444  | 0.497597  |
| C  | -3.801388 | -0.726596 | -0.488856 |
| C  | -4.239570 | 1.772412  | 0.136910  |
| H  | -5.329148 | 1.642933  | 0.137015  |
| H  | -3.987760 | 2.541770  | 0.875437  |
| H  | -3.930534 | 2.135752  | -0.846195 |
| C  | -3.815293 | 0.109003  | 1.965746  |
| H  | -3.421544 | 0.908090  | 2.603066  |
| H  | -4.888589 | 0.005237  | 2.163271  |
| H  | -3.313825 | -0.823455 | 2.243546  |
| C  | -4.046492 | -0.271783 | -1.935179 |
| H  | -4.017364 | -1.149100 | -2.589566 |
| H  | -5.022358 | 0.215026  | -2.047620 |
| H  | -3.265901 | 0.420759  | -2.265844 |

|   |           |           |           |
|---|-----------|-----------|-----------|
| C | -4.898876 | -1.695907 | -0.054680 |
| H | -5.863384 | -1.179249 | 0.028889  |
| H | -5.000870 | -2.492741 | -0.799299 |
| H | -4.665995 | -2.162585 | 0.905510  |
| H | 0.176202  | 3.389377  | -0.521609 |

Electronic Energy = -1103.06390231 (Hartree/Particle)

Dipole Moment (Debye): 4.5991

index 0

Harmonic frequencies

Number of imaginary frequencies= 0

#### THERMOCHEMICAL DATA

Temperature 298.150 Kelvin. Pressure 1.00000 Atm.

Zero-point correction= 0.333410

(Hartree/Particle)

Thermal correction to Energy= 0.355091

Thermal correction to Enthalpy= 0.356035

Thermal correction to Gibbs Free Energy= 0.280581

Sum of electronic and zero-point Energies= -1102.730493

Sum of electronic and thermal Energies= -1102.708811

Sum of electronic and thermal Enthalpies= -1102.707867

Sum of electronic and thermal Free Energies= -1102.783322

PCM-SP (solvent=THF;6-311+g(2d,p)) = -1103.33107889

Corrected Free Energy = -1103.050498580

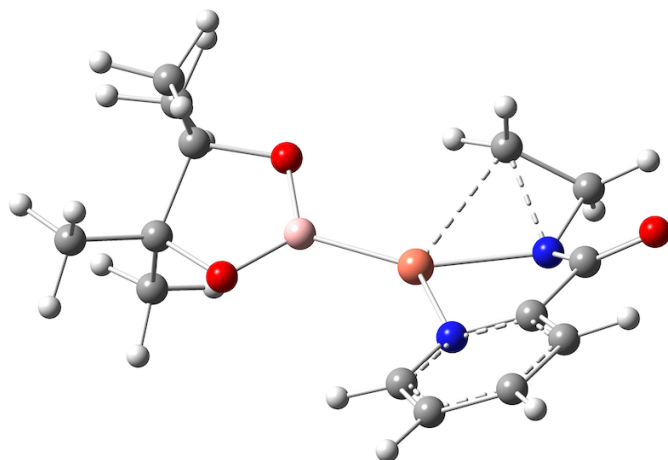

TS1 Substrate: N-(2-picolinoyl)-aziridine

#### CARTESIAN COORDINATES

|    |           |           |           |
|----|-----------|-----------|-----------|
| N  | -2.157884 | 1.000066  | -0.271207 |
| C  | -3.282602 | 0.341837  | 0.061414  |
| C  | -4.442247 | 1.000531  | 0.478829  |
| C  | -4.432869 | 2.394943  | 0.519740  |
| C  | -3.266031 | 3.078186  | 0.163773  |
| C  | -2.143022 | 2.337054  | -0.211243 |
| C  | -3.233571 | -1.160401 | -0.000298 |
| O  | -4.166339 | -1.846490 | 0.413908  |
| Cu | -0.480548 | -0.345464 | -0.446033 |
| B  | 1.450238  | 0.003426  | -0.197391 |
| O  | 2.159526  | 1.179032  | -0.428992 |
| C  | 3.583943  | 0.903599  | -0.315392 |

|   |           |           |           |
|---|-----------|-----------|-----------|
| C | 4.276348  | 2.126322  | 0.282442  |
| N | -2.069422 | -1.661372 | -0.590599 |
| C | -0.856338 | -2.519069 | 0.461252  |
| C | -1.861239 | -3.098972 | -0.451267 |
| O | 2.315644  | -0.984333 | 0.284941  |
| C | 3.603993  | -0.379215 | 0.588232  |
| C | 3.603978  | -0.062970 | 2.090852  |
| C | 4.709767  | -1.381527 | 0.265845  |
| C | 4.103321  | 0.650330  | -1.738112 |
| H | -2.698245 | -3.642021 | -0.012823 |
| H | -1.143856 | -2.341834 | 1.492116  |
| H | 0.205212  | -2.533565 | 0.239113  |
| H | -5.310271 | 0.414869  | 0.761745  |
| H | -5.319565 | 2.941489  | 0.829176  |
| H | -1.199610 | 2.809268  | -0.471470 |
| H | -3.220386 | 4.162887  | 0.179675  |
| H | 5.698638  | -0.925452 | 0.400264  |
| H | 4.636289  | -2.241709 | 0.940425  |
| H | 4.630923  | -1.750805 | -0.759493 |
| H | 3.413284  | -0.987348 | 2.646325  |
| H | 4.566177  | 0.347031  | 2.419107  |
| H | 2.812910  | 0.651217  | 2.340744  |
| H | 3.871665  | 1.522393  | -2.358364 |
| H | 5.187921  | 0.491397  | -1.751616 |
| H | 3.613454  | -0.220675 | -2.184886 |
| H | 5.339399  | 1.921968  | 0.461889  |
| H | 4.203250  | 2.968190  | -0.414632 |
| H | 3.813704  | 2.429522  | 1.224826  |
| H | -1.476275 | -3.555922 | -1.362811 |

Electronic Energy = -1103.03395879 (Hartree/Particle)

Dipole Moment (Debye): 2.2937

index 0

Harmonic frequencies

Number of imaginary frequencies= 1

Negatives Eigenvalues: -360.238

#### THERMOCHEMICAL DATA

Temperature 298.150 Kelvin. Pressure 1.00000 Atm.

Zero-point correction= 0.331157

(Hartree/Particle)

Thermal correction to Energy= 0.352398

Thermal correction to Enthalpy= 0.353342

Thermal correction to Gibbs Free Energy= 0.278812

Sum of electronic and zero-point Energies= -1102.702801

Sum of electronic and thermal Energies= -1102.681561

Sum of electronic and thermal Enthalpies= -1102.680617

Sum of electronic and thermal Free Energies= -1102.755147

PCM-SP (solvent=THF;6-311+g(2d,p)) = -1103.29923250

Corrected Free Energy = -1103.020420710

-----

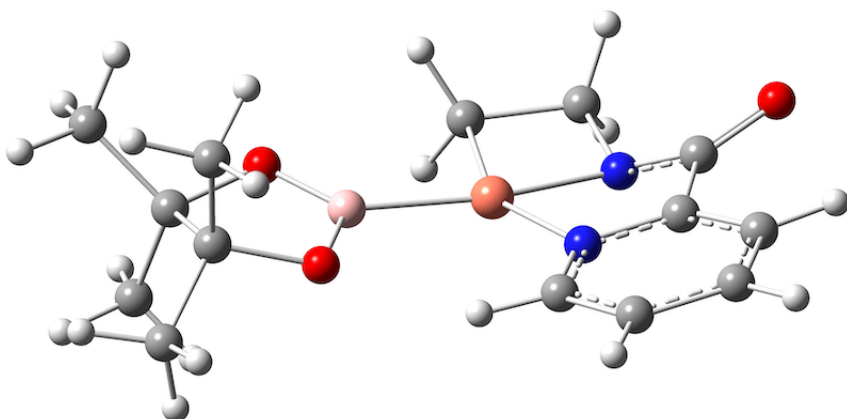

I1 Substrate: N-(2-picolinoyl)-aziridine

# CARTESIAN COORDINATES

|    |           |           |           |
|----|-----------|-----------|-----------|
| C  | 1.909592  | -3.004087 | 0.020938  |
| C  | 0.386511  | -2.758070 | 0.011979  |
| H  | 2.233571  | -3.753591 | -0.713782 |
| H  | -0.165147 | -3.152630 | -0.842693 |
| H  | -0.151938 | -2.922717 | 0.945758  |
| N  | 2.328969  | -1.650163 | -0.341823 |
| C  | 3.349825  | -0.939388 | 0.157533  |
| C  | 3.046163  | 0.556562  | 0.008636  |
| C  | 4.028876  | 1.532833  | 0.149306  |
| C  | 3.663801  | 2.875918  | 0.037545  |
| H  | 5.046787  | 1.214574  | 0.349414  |
| C  | 1.388163  | 2.175133  | -0.292605 |
| C  | 2.324066  | 3.204833  | -0.189247 |
| H  | 4.412508  | 3.658083  | 0.132132  |
| H  | 0.327480  | 2.353424  | -0.440114 |
| H  | 2.002539  | 4.238067  | -0.275959 |
| O  | 4.399111  | -1.318212 | 0.692253  |
| N  | 1.749757  | 0.887021  | -0.202915 |
| Cu | 0.640164  | -0.823538 | -0.244799 |
| B  | -1.267967 | -0.342678 | -0.078820 |
| O  | -2.323634 | -1.167325 | 0.225614  |
| O  | -1.668631 | 0.969134  | -0.261215 |
| C  | -3.560325 | -0.413073 | 0.030472  |
| C  | -3.067488 | 1.073846  | 0.161875  |
| C  | -4.571263 | -0.853267 | 1.084827  |
| H  | -5.482805 | -0.246656 | 1.021760  |
| H  | -4.844824 | -1.900149 | 0.917338  |
| H  | -4.162992 | -0.769703 | 2.094673  |
| C  | -4.069217 | -0.763217 | -1.373460 |
| H  | -4.200696 | -1.847745 | -1.441333 |
| H  | -5.031044 | -0.282456 | -1.583535 |
| H  | -3.350131 | -0.461003 | -2.141598 |
| C  | -3.048448 | 1.584130  | 1.607828  |
| H  | -2.512997 | 2.538573  | 1.641240  |
| H  | -4.062754 | 1.742659  | 1.990324  |
| H  | -2.530268 | 0.881695  | 2.268301  |
| C  | -3.777644 | 2.074056  | -0.744592 |
| H  | -4.849050 | 2.109268  | -0.513147 |
| H  | -3.362666 | 3.075429  | -0.587505 |
| H  | -3.655424 | 1.819348  | -1.799858 |
| H  | 2.293408  | -3.302519 | 1.005583  |

Electronic Energy = -1103.07323400 (Hartree/Particle)  
 Dipole Moment (Debye): 7.2003  
 index 0  
 Harmonic frequencies  
 Number of imaginary frequencies= 0

# THERMOCHEMICAL DATA

Temperature 298.150 Kelvin. Pressure 1.00000 Atm.  
 Zero-point correction= 0.333209  
 (Hartree/Particle)  
 Thermal correction to Energy= 0.354210  
 Thermal correction to Enthalpy= 0.355154  
 Thermal correction to Gibbs Free Energy= 0.282281  
 Sum of electronic and zero-point Energies= -1102.740025  
 Sum of electronic and thermal Energies= -1102.719024  
 Sum of electronic and thermal Enthalpies= -1102.718080  
 Sum of electronic and thermal Free Energies= -1102.790953  
 PCM-SP (solvent=THF;6-311+g(2d,p)) = -1103.340038680  
 Corrected Free Energy = -1103.057757680

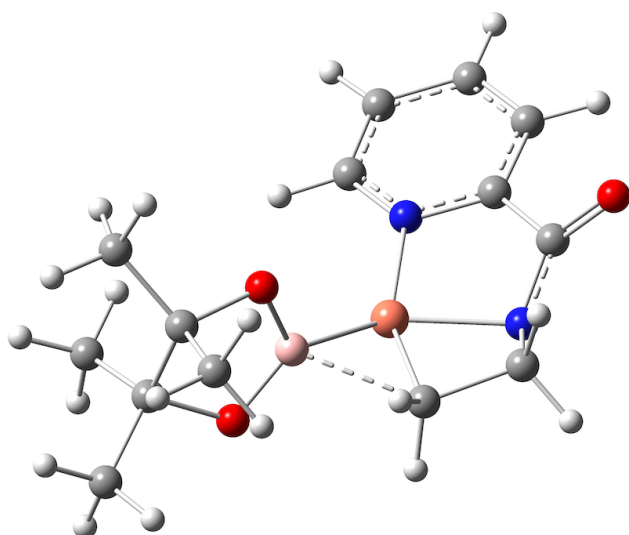

TS2 Substrate: N-(2-picolinoyl)-aziridine

## CARTESIAN COORDINATES

|    |           |           |           |
|----|-----------|-----------|-----------|
| C  | 0.962623  | -2.788739 | -0.216965 |
| Cu | 0.594820  | -0.375960 | -0.588670 |
| B  | -1.323467 | -0.250497 | -0.211515 |
| O  | -2.284309 | -0.032510 | -1.173965 |
| C  | -3.401320 | 0.644253  | -0.515072 |
| C  | -4.699844 | 0.189254  | -1.173154 |
| C  | -0.391142 | -2.103047 | -0.589507 |
| N  | 1.958578  | -1.772640 | -0.577250 |
| C  | 2.925178  | -1.397048 | 0.266941  |
| O  | 3.527766  | -2.025945 | 1.152619  |
| C  | 3.199275  | 0.108823  | 0.121152  |
| C  | 4.427952  | 0.679749  | 0.451481  |
| C  | 4.582234  | 2.062188  | 0.361629  |
| C  | 3.490379  | 2.847039  | -0.025081 |
| C  | 2.281458  | 2.214791  | -0.304201 |
| N  | 2.139804  | 0.880091  | -0.239955 |

|   |           |           |           |
|---|-----------|-----------|-----------|
| O | -1.773573 | -0.012249 | 1.066433  |
| C | -3.220565 | 0.197219  | 0.982384  |
| C | -3.878460 | -1.151757 | 1.295503  |
| C | -3.621766 | 1.238534  | 2.021296  |
| C | -3.193434 | 2.148891  | -0.727391 |
| H | 1.074002  | -3.727796 | -0.779275 |
| H | -0.666301 | -2.268078 | -1.635351 |
| H | -1.214738 | -2.419579 | 0.055693  |
| H | 5.227081  | 0.022723  | 0.778178  |
| H | 5.536497  | 2.526619  | 0.596065  |
| H | 1.394117  | 2.774855  | -0.582911 |
| H | 3.566156  | 3.927445  | -0.097953 |
| H | -4.685142 | 1.488307  | 1.924099  |
| H | -3.453875 | 0.839532  | 3.026935  |
| H | -3.034862 | 2.154320  | 1.920198  |
| H | -3.535957 | -1.493973 | 2.277128  |
| H | -4.970482 | -1.068497 | 1.317318  |
| H | -3.605301 | -1.910864 | 0.555258  |
| H | -3.127550 | 2.348883  | -1.801573 |
| H | -4.025060 | 2.730352  | -0.314995 |
| H | -2.263263 | 2.488171  | -0.259971 |
| H | -5.564788 | 0.606948  | -0.644065 |
| H | -4.730501 | 0.539784  | -2.209985 |
| H | -4.786730 | -0.899634 | -1.182883 |
| H | 1.011118  | -3.031597 | 0.852738  |

Electronic Energy = -1103.06636388 (Hartree/Particle)

Dipole Moment (Debye): 7.3715

index 0

Harmonic frequencies

Number of imaginary frequencies= 1

Negatives Eigenvalues: -116.042

#### THERMOCHEMICAL DATA

Temperature 298.150 Kelvin. Pressure 1.00000 Atm.

Zero-point correction= 0.332836

(Hartree/Particle)

Thermal correction to Energy= 0.353061

Thermal correction to Enthalpy= 0.354005

Thermal correction to Gibbs Free Energy= 0.284125

Sum of electronic and zero-point Energies= -1102.733528

Sum of electronic and thermal Energies= -1102.713303

Sum of electronic and thermal Enthalpies= -1102.712359

Sum of electronic and thermal Free Energies= -1102.782239

PCM-SP (solvent=THF;6-311+g(2d,p)) = -1103.338300330

Corrected Free Energy = -1103.054175450

-----

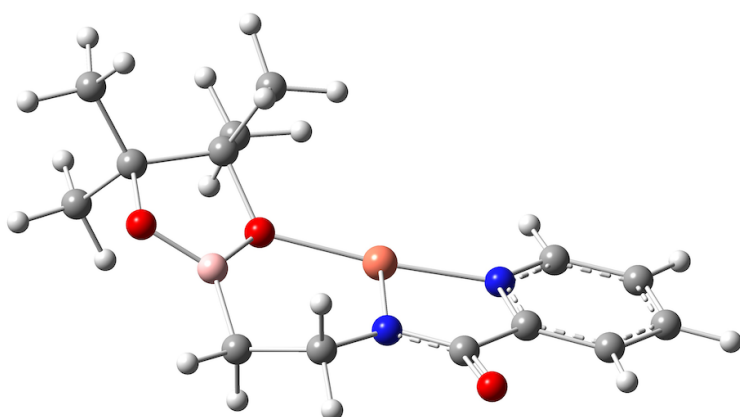

P1 Substrate: N-(2-picolinoyl)-aziridine

# CARTESIAN COORDINATES

|    |           |           |           |
|----|-----------|-----------|-----------|
| C  | -0.233591 | 2.661788  | 0.058186  |
| Cu | -0.503801 | -0.444046 | -0.302499 |
| B  | 1.945344  | 1.187104  | -0.328031 |
| O  | 1.483527  | -0.146111 | -0.348564 |
| C  | 2.508505  | -0.999375 | 0.286224  |
| C  | 2.487553  | -2.354599 | -0.406261 |
| C  | 1.086935  | 2.440110  | -0.722403 |
| N  | -1.070188 | 1.482986  | -0.030576 |
| C  | -2.369706 | 1.595940  | 0.220838  |
| O  | -3.038189 | 2.607135  | 0.527906  |
| C  | -3.116820 | 0.258172  | 0.100111  |
| C  | -4.505312 | 0.229460  | 0.253871  |
| C  | -5.185741 | -0.981407 | 0.140357  |
| C  | -4.459348 | -2.146821 | -0.120693 |
| C  | -3.076534 | -2.048854 | -0.254973 |
| N  | -2.417599 | -0.880634 | -0.147709 |
| O  | 3.264356  | 1.223203  | 0.031669  |
| C  | 3.796114  | -0.134402 | 0.060383  |
| C  | 4.457745  | -0.376640 | -1.301519 |
| C  | 4.828725  | -0.229093 | 1.179374  |
| C  | 2.105773  | -1.134897 | 1.756994  |
| H  | -0.754038 | 3.545227  | -0.338039 |
| H  | 0.824792  | 2.330819  | -1.787373 |
| H  | 1.717888  | 3.335213  | -0.646035 |
| H  | -5.005901 | 1.169488  | 0.458662  |
| H  | -6.266147 | -1.019043 | 0.253938  |
| H  | -2.463378 | -2.922346 | -0.453227 |
| H  | -4.946130 | -3.112541 | -0.216483 |
| H  | 5.186149  | -1.259949 | 1.286770  |
| H  | 5.686176  | 0.407955  | 0.940458  |
| H  | 4.418175  | 0.103034  | 2.135536  |
| H  | 5.218991  | 0.392156  | -1.465429 |
| H  | 4.940408  | -1.358965 | -1.342313 |
| H  | 3.728028  | -0.310248 | -2.115134 |
| H  | 1.094895  | -1.554914 | 1.809956  |
| H  | 2.787862  | -1.801131 | 2.294913  |
| H  | 2.092665  | -0.162230 | 2.258013  |
| H  | 3.276726  | -3.000824 | -0.005821 |
| H  | 1.520888  | -2.838056 | -0.225238 |
| H  | 2.621137  | -2.260820 | -1.486118 |
| H  | -0.004512 | 2.892409  | 1.112568  |

Electronic Energy = -1103.14609975 (Hartree/Particle)  
 Dipole Moment (Debye): 8.8804  
 index 0  
 Harmonic frequencies  
 Number of imaginary frequencies= 0

#### THERMOCHEMICAL DATA

Temperature 298.150 Kelvin. Pressure 1.00000 Atm.  
 Zero-point correction= 0.334744  
 (Hartree/Particle)  
 Thermal correction to Energy= 0.355453  
 Thermal correction to Enthalpy= 0.356397  
 Thermal correction to Gibbs Free Energy= 0.285303  
 Sum of electronic and zero-point Energies= -1102.811355  
 Sum of electronic and thermal Energies= -1102.790647  
 Sum of electronic and thermal Enthalpies= -1102.789702  
 Sum of electronic and thermal Free Energies= -1102.860796  
 PCM-SP (solvent=THF;6-311+g(2d,p)) = -1103.41620638  
 Corrected Free Energy = -1103.13090263

-----  
 SUBSTRATE: N-(2-PICOLINOYL)-METHYL AZIRIDINE

N-(2-picolinoyl)-methyl aziridine

#### CARTESIAN COORDINATES

|   |           |           |           |
|---|-----------|-----------|-----------|
| N | 0.739112  | 0.955005  | -0.079436 |
| C | 0.776532  | -0.387910 | -0.072773 |
| C | 1.967630  | -1.120861 | 0.008367  |
| C | 3.174191  | -0.425834 | 0.075142  |
| C | 3.145540  | 0.969825  | 0.065820  |
| C | 1.903300  | 1.608771  | -0.009241 |
| C | -0.528476 | -1.147080 | -0.140626 |
| O | -0.556011 | -2.370787 | -0.055804 |
| N | -1.655332 | -0.388689 | -0.382427 |
| C | -2.238070 | 0.636589  | 0.469511  |
| C | -2.633731 | 1.941152  | -0.174604 |
| C | -2.954307 | -0.662022 | 0.196876  |
| H | -1.786307 | 0.724153  | 1.458422  |
| H | 1.921745  | -2.204427 | 0.015446  |
| H | 4.117646  | -0.962213 | 0.133503  |
| H | 1.841136  | 2.695632  | -0.014609 |
| H | 4.059521  | 1.554850  | 0.116273  |
| H | -2.993625 | -1.420789 | 0.977345  |
| H | -3.351531 | 2.479435  | 0.456363  |
| H | -1.745589 | 2.566318  | -0.314562 |
| H | -3.090604 | 1.765469  | -1.154598 |
| H | -3.786413 | -0.672113 | -0.504951 |

Electronic Energy = -533.711901220 (Hartree/Particle)  
 Dipole Moment (Debye): 3.3143  
 index 0  
 Harmonic frequencies  
 Number of imaginary frequencies= 0

#### THERMOCHEMICAL DATA

Temperature 298.150 Kelvin. Pressure 1.00000 Atm.  
 Zero-point correction= 0.177547  
 (Hartree/Particle)  
 Thermal correction to Energy= 0.188078  
 Thermal correction to Enthalpy= 0.189022  
 Thermal correction to Gibbs Free Energy= 0.140571  
 Sum of electronic and zero-point Energies= -533.534355  
 Sum of electronic and thermal Energies= -533.523824  
 Sum of electronic and thermal Enthalpies= -533.522879  
 Sum of electronic and thermal Free Energies= -533.571331  
 PCM-SP (solvent=THF;6-311+g(2d,p)) = -533.855563883  
 Corrected Free Energy = -533.714993663

---

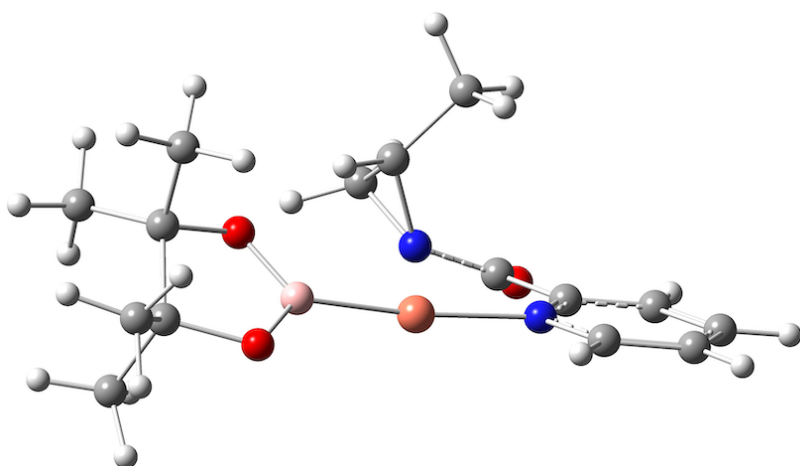

Complex-1 Substrate: N-(2-picolinoyl)-methyl aziridine

#### CARTESIAN COORDINATES

|    |           |           |           |
|----|-----------|-----------|-----------|
| N  | 2.310494  | -1.036268 | 0.010075  |
| C  | 3.262244  | -0.127749 | -0.305403 |
| C  | 4.626386  | -0.418974 | -0.198799 |
| C  | 5.025672  | -1.673261 | 0.257416  |
| C  | 4.044335  | -2.609506 | 0.586416  |
| C  | 2.706040  | -2.250223 | 0.443192  |
| C  | 2.883953  | 1.251159  | -0.804598 |
| O  | 3.709505  | 1.920604  | -1.419434 |
| Cu | 0.304735  | -0.832843 | -0.135828 |
| B  | -1.640870 | -0.585303 | -0.090424 |
| O  | -2.662583 | -1.496993 | -0.331330 |
| C  | -3.927240 | -0.784768 | -0.414428 |
| C  | -5.028670 | -1.666306 | 0.170436  |
| N  | 1.586293  | 1.651535  | -0.591680 |
| C  | 0.960401  | 2.082498  | 0.674070  |
| C  | 1.788387  | 2.110464  | 1.936381  |
| C  | 1.211784  | 3.044612  | -0.450602 |
| O  | -2.189882 | 0.668535  | 0.216275  |
| C  | -3.626402 | 0.525714  | 0.393716  |
| C  | -3.876200 | 0.379592  | 1.901905  |
| C  | -4.316164 | 1.783470  | -0.129922 |
| C  | -4.196769 | -0.528514 | -1.904510 |
| H  | -0.057390 | 1.711631  | 0.783576  |
| H  | 5.340987  | 0.345318  | -0.482345 |
| H  | 6.080548  | -1.915537 | 0.351402  |

|   |           |           |           |
|---|-----------|-----------|-----------|
| H | 1.908241  | -2.949205 | 0.675767  |
| H | 4.301056  | -3.602262 | 0.942516  |
| H | -5.407198 | 1.673193  | -0.092095 |
| H | -4.038637 | 2.642411  | 0.491287  |
| H | -4.021996 | 2.003621  | -1.158963 |
| H | -3.457981 | 1.251935  | 2.415550  |
| H | -4.946310 | 0.321467  | 2.132494  |
| H | -3.381556 | -0.514088 | 2.295391  |
| H | -4.193722 | -1.487620 | -2.432588 |
| H | -5.168024 | -0.045659 | -2.064037 |
| H | -3.413939 | 0.099174  | -2.342030 |
| H | -5.983245 | -1.125996 | 0.202097  |
| H | -5.159265 | -2.555385 | -0.455893 |
| H | -4.781123 | -2.001528 | 1.180556  |
| H | 0.377495  | 3.364651  | -1.070886 |
| H | 1.309549  | 2.758553  | 2.679661  |
| H | 1.866738  | 1.105151  | 2.366697  |
| H | 2.799788  | 2.490447  | 1.748244  |
| H | 2.032654  | 3.755389  | -0.359733 |

Electronic Energy = -1142.38831055 (Hartree/Particle)  
Dipole Moment (Debye): 4.6135  
index 0  
Harmonic frequencies  
Number of imaginary frequencies= 0

#### THERMOCHEMICAL DATA

Temperature 298.150 Kelvin. Pressure 1.00000 Atm.  
Zero-point correction= 0.361536  
(Hartree/Particle)  
Thermal correction to Energy= 0.384669  
Thermal correction to Enthalpy= 0.385614  
Thermal correction to Gibbs Free Energy= 0.306949  
Sum of electronic and zero-point Energies= -1142.026774  
Sum of electronic and thermal Energies= -1142.003641  
Sum of electronic and thermal Enthalpies= -1142.002697  
Sum of electronic and thermal Free Energies= -1142.081362  
PCM-SP (solvent=THF;6-311+g(2d,p)) = -1142.66700664  
Corrected Free Energy = -1142.36293795

-----

PATH: ANTI\_MARKOVNIKOV

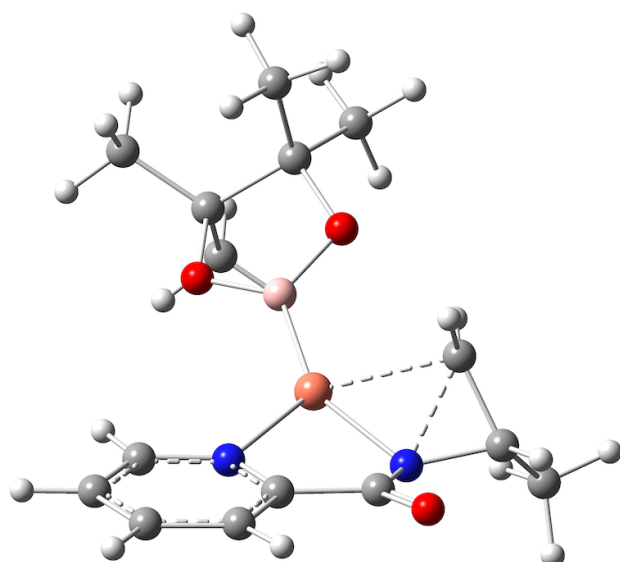

TS1      Substrate: N-(2-picolinoyl)-methyl aziridine  
 Path: anti-Markovnikov

# CARTESIAN COORDINATES

|    |           |           |           |
|----|-----------|-----------|-----------|
| N  | 2.057018  | -1.213949 | -0.293452 |
| C  | 3.209598  | -0.643956 | 0.100543  |
| C  | 4.343246  | -1.392129 | 0.428787  |
| C  | 4.276012  | -2.780849 | 0.312625  |
| C  | 3.079822  | -3.371362 | -0.105903 |
| C  | 1.986722  | -2.547088 | -0.384306 |
| C  | 3.221174  | 0.857104  | 0.211014  |
| O  | 4.188470  | 1.453991  | 0.681304  |
| Cu | 0.435591  | 0.228720  | -0.323142 |
| B  | -1.508174 | -0.091876 | -0.147358 |
| O  | -2.244819 | -1.213992 | -0.518856 |
| C  | -3.663120 | -0.913037 | -0.395126 |
| C  | -4.397529 | -2.174613 | 0.053320  |
| N  | 2.069033  | 1.464836  | -0.292666 |
| C  | 0.895790  | 2.238601  | 0.870009  |
| C  | 1.901326  | 2.887832  | 0.001663  |
| O  | -2.355983 | 0.860152  | 0.429432  |
| C  | -3.664612 | 0.261728  | 0.645159  |
| C  | -3.698938 | -0.219037 | 2.103140  |
| C  | -4.737825 | 1.324505  | 0.420944  |
| C  | -4.151586 | -0.489503 | -1.787999 |
| H  | 2.764029  | 3.320390  | 0.510918  |
| H  | -0.168345 | 2.315457  | 0.667226  |
| H  | 5.236467  | -0.877943 | 0.766940  |
| H  | 5.140930  | -3.394545 | 0.549349  |
| H  | 1.023343  | -2.947967 | -0.687820 |
| H  | 2.989082  | -4.448192 | -0.211605 |
| H  | -5.740765 | 0.884820  | 0.490109  |
| H  | -4.652681 | 2.102194  | 1.187967  |
| H  | -4.631799 | 1.802836  | -0.555729 |
| H  | -3.493398 | 0.632388  | 2.760586  |
| H  | -4.677151 | -0.635567 | 2.370185  |
| H  | -2.931390 | -0.978476 | 2.283217  |
| H  | -3.930772 | -1.293068 | -2.498224 |
| H  | -5.231568 | -0.301619 | -1.799482 |
| H  | -3.632813 | 0.412551  | -2.127718 |

|   |           |           |           |
|---|-----------|-----------|-----------|
| H | -5.457655 | -1.961603 | 0.239912  |
| H | -4.335125 | -2.935687 | -0.732114 |
| H | -3.958890 | -2.593440 | 0.962307  |
| H | 1.189671  | 1.931727  | 1.868194  |
| C | 1.399719  | 3.709539  | -1.169951 |
| H | 1.070017  | 4.697261  | -0.826731 |
| H | 2.197783  | 3.845043  | -1.908044 |
| H | 0.557262  | 3.206102  | -1.657275 |

Electronic Energy = -1142.35837407 (Hartree/Particle)  
Dipole Moment (Debye): 2.0990  
index 0  
Harmonic frequencies  
Number of imaginary frequencies= 1  
Negatives Eigenvalues: -354.351

#### THERMOCHEMICAL DATA

Temperature 298.150 Kelvin. Pressure 1.00000 Atm.  
Zero-point correction= 0.359037  
(Hartree/Particle)  
Thermal correction to Energy= 0.381795  
Thermal correction to Enthalpy= 0.382739  
Thermal correction to Gibbs Free Energy= 0.305011  
Sum of electronic and zero-point Energies= -1141.999337  
Sum of electronic and thermal Energies= -1141.976579  
Sum of electronic and thermal Enthalpies= -1141.975635  
Sum of electronic and thermal Free Energies= -1142.053363  
PCM-SP (solvent=THF;6-311+g(2d,p)) = -1142.63449331  
Corrected Free Energy = -1142.32948224

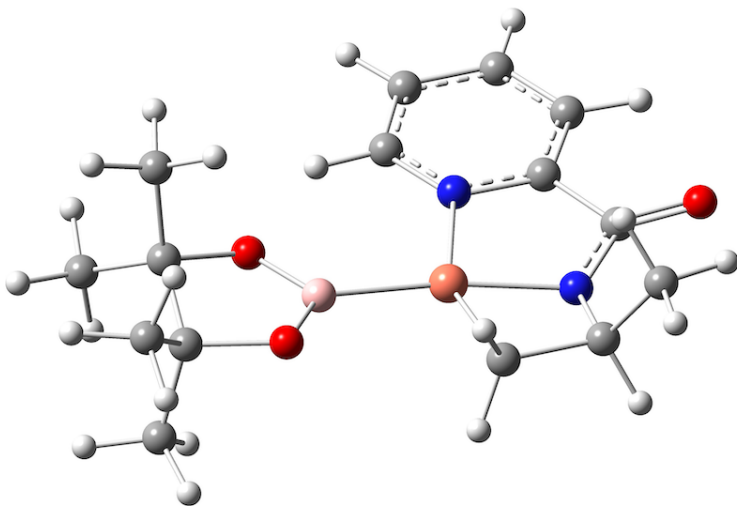

I1 Substrate: N-(2-picolinoyl)-methyl aziridine  
Path: anti-Markovnikov

#### CARTESIAN COORDINATES

|   |          |          |           |
|---|----------|----------|-----------|
| N | 1.558320 | 1.183179 | -0.137824 |
| C | 2.892995 | 0.955679 | -0.070341 |
| C | 3.800082 | 2.004675 | 0.049651  |
| C | 3.316521 | 3.314496 | 0.084419  |
| C | 1.938985 | 3.537163 | 0.009527  |

|    |           |           |           |
|----|-----------|-----------|-----------|
| C  | 1.086008  | 2.437365  | -0.095070 |
| C  | 3.350771  | -0.510453 | -0.091974 |
| O  | 4.528727  | -0.806044 | 0.150037  |
| Cu | 0.571913  | -0.597708 | -0.258717 |
| N  | 2.304409  | -1.280140 | -0.399751 |
| C  | 2.014522  | -2.704292 | -0.247622 |
| C  | 0.471312  | -2.563756 | -0.245167 |
| C  | 2.586320  | -3.325828 | 1.026405  |
| B  | -1.371635 | -0.280073 | -0.099900 |
| O  | -2.373595 | -1.215635 | 0.002134  |
| C  | -3.655752 | -0.526247 | -0.122240 |
| C  | -4.670108 | -1.214962 | 0.785734  |
| O  | -1.867142 | 1.012749  | -0.071536 |
| C  | -3.284350 | 0.944106  | 0.290936  |
| C  | -3.360874 | 1.190095  | 1.802701  |
| C  | -4.034243 | 2.037849  | -0.462851 |
| C  | -4.082116 | -0.655937 | -1.590002 |
| H  | 2.367570  | -3.271856 | -1.122082 |
| H  | -0.054371 | -2.890488 | -1.143845 |
| H  | -0.043749 | -2.887974 | 0.660911  |
| H  | 4.856061  | 1.763882  | 0.117117  |
| H  | 4.004299  | 4.151525  | 0.172076  |
| H  | 0.005414  | 2.530999  | -0.141131 |
| H  | 1.525581  | 4.540569  | 0.036755  |
| H  | 2.282759  | -4.377172 | 1.107892  |
| H  | 3.678731  | -3.265251 | 1.025037  |
| H  | -5.622435 | -0.670917 | 0.782363  |
| H  | -4.855772 | -2.231861 | 0.424701  |
| H  | -4.308788 | -1.283996 | 1.814404  |
| H  | -4.127681 | -1.717681 | -1.852232 |
| H  | -5.069008 | -0.212381 | -1.762420 |
| H  | -3.358991 | -0.173973 | -2.255788 |
| H  | -2.901324 | 2.157690  | 2.029270  |
| H  | -4.398478 | 1.208523  | 2.153929  |
| H  | -2.816594 | 0.418707  | 2.356656  |
| H  | -5.113366 | 1.957349  | -0.284642 |
| H  | -3.704163 | 3.021685  | -0.112399 |
| H  | -3.851982 | 1.983601  | -1.538639 |
| H  | 2.215522  | -2.786634 | 1.907685  |

Electronic Energy = -1142.39531716 (Hartree/Particle)

Dipole Moment (Debye): 6.9198

index 0

Harmonic frequencies

Number of imaginary frequencies= 0

#### THERMOCHEMICAL DATA

Temperature 298.150 Kelvin. Pressure 1.00000 Atm.

Zero-point correction= 0.361253

(Hartree/Particle)

Thermal correction to Energy= 0.383694

Thermal correction to Enthalpy= 0.384638

Thermal correction to Gibbs Free Energy= 0.308618

Sum of electronic and zero-point Energies= -1142.034064

Sum of electronic and thermal Energies= -1142.011624

Sum of electronic and thermal Enthalpies= -1142.010679

Sum of electronic and thermal Free Energies= -1142.086699

PCM-SP (solvent=THF;6-311+g(2d,p)) = -1142.67196072

Corrected Free Energy = -1142.36334256

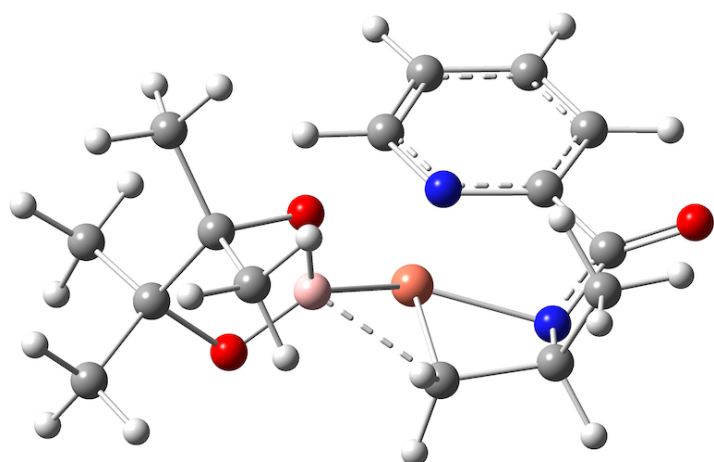

TS2      Substrate: N-(2-picolinoyl)-methyl aziridine  
 Path: anti-Markovnikov

#### CARTESIAN COORDINATES

|    |           |           |           |
|----|-----------|-----------|-----------|
| N  | -2.099117 | -1.086394 | -0.150624 |
| C  | -3.189198 | -0.299227 | 0.056007  |
| C  | -4.424153 | -0.854772 | 0.389819  |
| C  | -4.550240 | -2.240614 | 0.474401  |
| C  | -3.426625 | -3.042189 | 0.248390  |
| C  | -2.216450 | -2.421327 | -0.051646 |
| C  | -2.977765 | 1.228833  | 0.010769  |
| O  | -3.753701 | 1.949791  | 0.661220  |
| Cu | -0.549437 | 0.123497  | -0.618419 |
| N  | -1.904558 | 1.506996  | -0.729222 |
| C  | -0.917532 | 2.577166  | -0.519454 |
| C  | 0.413771  | 1.841702  | -0.907374 |
| C  | -0.873951 | 3.122477  | 0.911475  |
| B  | 1.384831  | 0.111068  | -0.281556 |
| O  | 1.854710  | 0.070601  | 1.012327  |
| C  | 3.303334  | -0.128048 | 0.940417  |
| C  | 3.733496  | -0.998493 | 2.116039  |
| O  | 2.339708  | -0.233359 | -1.213665 |
| C  | 3.474624  | -0.788506 | -0.477284 |
| C  | 3.289744  | -2.311008 | -0.462182 |
| C  | 4.758210  | -0.416567 | -1.212433 |
| C  | 3.942779  | 1.261798  | 1.042289  |
| H  | -1.069028 | 3.415334  | -1.219265 |
| H  | 0.592981  | 1.849057  | -1.987057 |
| H  | 1.284047  | 2.264509  | -0.397959 |
| H  | -5.250292 | -0.178248 | 0.581942  |
| H  | -5.507843 | -2.693081 | 0.718626  |
| H  | -1.307315 | -2.991774 | -0.215253 |
| H  | -3.478964 | -4.124555 | 0.312549  |
| H  | -0.092945 | 3.887571  | 1.005567  |
| H  | -1.839403 | 3.554115  | 1.186436  |
| H  | 4.799680  | -1.244375 | 2.042528  |
| H  | 3.570372  | -0.457800 | 3.054020  |
| H  | 3.160582  | -1.927620 | 2.159061  |
| H  | 3.606788  | 1.739863  | 1.967776  |
| H  | 5.036226  | 1.198345  | 1.059677  |

|   |           |           |           |
|---|-----------|-----------|-----------|
| H | 3.648100  | 1.899754  | 0.202682  |
| H | 3.215377  | -2.668647 | -1.494072 |
| H | 4.135435  | -2.812675 | 0.020473  |
| H | 2.370420  | -2.591023 | 0.062392  |
| H | 5.635892  | -0.739280 | -0.639623 |
| H | 4.782848  | -0.915206 | -2.186902 |
| H | 4.827191  | 0.660194  | -1.383218 |
| H | -0.650888 | 2.310963  | 1.616027  |

Electronic Energy = -1142.38693333 (Hartree/Particle)  
Dipole Moment (Debye): 7.2355  
index 0  
Harmonic frequencies  
Number of imaginary frequencies= 1  
Negatives Eigenvalues: -111.628

#### THERMOCHEMICAL DATA

Temperature 298.150 Kelvin. Pressure 1.00000 Atm.  
Zero-point correction= 0.360854  
(Hartree/Particle)  
Thermal correction to Energy= 0.382440  
Thermal correction to Enthalpy= 0.383384  
Thermal correction to Gibbs Free Energy= 0.310726  
Sum of electronic and zero-point Energies= -1142.026079  
Sum of electronic and thermal Energies= -1142.004493  
Sum of electronic and thermal Enthalpies= -1142.003549  
Sum of electronic and thermal Free Energies= -1142.076207  
PCM-SP (solvent=THF;6-311+g(2d,p)) = -1142.66836204  
Corrected Free Energy = -1142.36073507

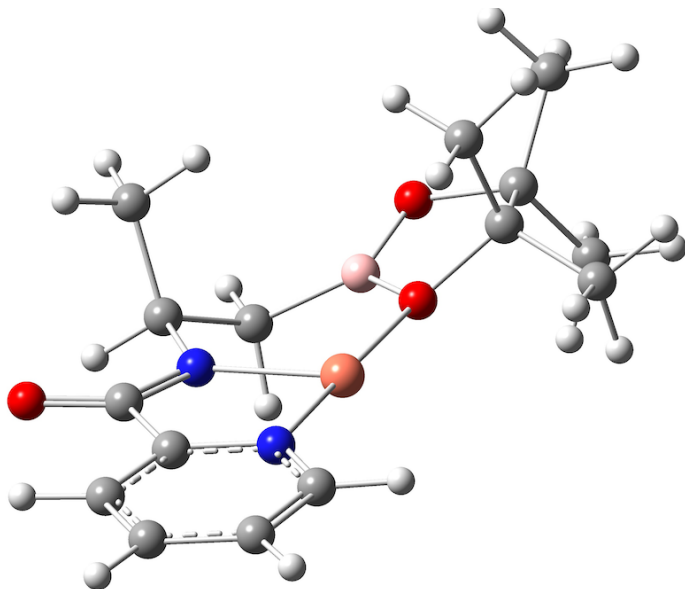

P1 Substrate: N-(2-picolinoyl)-methyl aziridine  
Path: anti-Markovnikov

#### CARTESIAN COORDINATES

|   |           |           |           |
|---|-----------|-----------|-----------|
| N | -2.430702 | -1.023142 | -0.088177 |
| C | -3.131893 | 0.138097  | -0.005961 |

|    |           |           |           |
|----|-----------|-----------|-----------|
| C  | -4.523968 | 0.130434  | 0.112516  |
| C  | -5.206048 | -1.084646 | 0.136912  |
| C  | -4.477552 | -2.274195 | 0.046959  |
| C  | -3.091251 | -2.195014 | -0.062312 |
| C  | -2.381755 | 1.479420  | -0.032352 |
| O  | -3.052990 | 2.521286  | 0.137838  |
| Cu | -0.511750 | -0.610163 | -0.260342 |
| N  | -1.077708 | 1.334187  | -0.240736 |
| C  | -0.225451 | 2.511176  | -0.246389 |
| C  | 1.063838  | 2.192484  | -1.052907 |
| B  | 1.938104  | 0.995376  | -0.536323 |
| O  | 3.268806  | 1.068751  | -0.230507 |
| C  | 3.796821  | -0.276206 | -0.034955 |
| C  | 4.862674  | -0.226162 | 1.055373  |
| C  | 0.104355  | 2.954692  | 1.189603  |
| O  | 1.472996  | -0.325976 | -0.366695 |
| C  | 2.514240  | -1.093757 | 0.344782  |
| C  | 2.155532  | -1.026673 | 1.831667  |
| C  | 2.467758  | -2.529635 | -0.157792 |
| C  | 4.415470  | -0.705233 | -1.370664 |
| H  | -0.746393 | 3.343164  | -0.742667 |
| H  | 0.758121  | 1.957141  | -2.084568 |
| H  | 1.696093  | 3.088095  | -1.108554 |
| H  | -5.025992 | 1.089198  | 0.182787  |
| H  | -6.289211 | -1.106870 | 0.225514  |
| H  | -2.476660 | -3.087101 | -0.130992 |
| H  | -4.965426 | -3.243972 | 0.063215  |
| H  | 0.768055  | 3.829355  | 1.195369  |
| H  | -0.819060 | 3.210379  | 1.718555  |
| H  | 5.220498  | -1.235474 | 1.290428  |
| H  | 5.714138  | 0.367179  | 0.707376  |
| H  | 4.481916  | 0.234725  | 1.969535  |
| H  | 5.174238  | 0.028396  | -1.659600 |
| H  | 4.892882  | -1.687891 | -1.292769 |
| H  | 3.661404  | -0.743330 | -2.163621 |
| H  | 1.144210  | -1.425890 | 1.969325  |
| H  | 2.849635  | -1.620878 | 2.434656  |
| H  | 2.162118  | 0.004583  | 2.197190  |
| H  | 3.267255  | -3.121558 | 0.301759  |
| H  | 1.505799  | -2.977505 | 0.116094  |
| H  | 2.567744  | -2.582921 | -1.244035 |
| H  | 0.600620  | 2.140521  | 1.736950  |

Electronic Energy = -1142.46838562 (Hartree/Particle)

Dipole Moment (Debye): 8.6974

index 0

Harmonic frequencies

Number of imaginary frequencies= 0

#### THERMOCHEMICAL DATA

Temperature 298.150 Kelvin. Pressure 1.00000 Atm.

Zero-point correction= 0.362904

(Hartree/Particle)

Thermal correction to Energy= 0.384972

Thermal correction to Enthalpy= 0.385916

Thermal correction to Gibbs Free Energy= 0.312272

Sum of electronic and zero-point Energies= -1142.105482

Sum of electronic and thermal Energies= -1142.083414

Sum of electronic and thermal Enthalpies= -1142.082470

-----

## CARTESIAN COORDINATES

S40

|   |           |           |           |
|---|-----------|-----------|-----------|
| H | -5.370782 | 2.878399  | 1.045772  |
| H | -1.262994 | 3.018037  | -0.288909 |
| H | -3.319561 | 4.229887  | 0.507728  |
| H | 5.658695  | -0.999972 | 0.437346  |
| H | 4.505219  | -2.276966 | 0.874601  |
| H | 4.600584  | -1.715858 | -0.800973 |
| H | 3.278119  | -1.028643 | 2.582139  |
| H | 4.507909  | 0.249334  | 2.461226  |
| H | 2.778525  | 0.651827  | 2.322975  |
| H | 4.080776  | 1.655441  | -2.286493 |
| H | 5.314914  | 0.531068  | -1.672799 |
| H | 3.724733  | -0.076581 | -2.198568 |
| H | 5.449052  | 1.857292  | 0.604780  |
| H | 4.408148  | 2.999951  | -0.269800 |
| H | 3.921886  | 2.416824  | 1.327773  |
| H | -1.436499 | -3.227891 | -1.885476 |
| C | -0.851407 | -2.493092 | 1.503824  |
| H | -0.523145 | -3.489000 | 1.842080  |
| H | -0.219737 | -1.745465 | 1.990818  |
| H | -1.892912 | -2.364325 | 1.813650  |

Electronic Energy = -1142.35990393 (Hartree/Particle)

Dipole Moment (Debye): 2.0494

index 0

Harmonic frequencies

Number of imaginary frequencies= 1

Negatives Eigenvalues: -305.921

#### THERMOCHEMICAL DATA

Temperature 298.150 Kelvin. Pressure 1.00000 Atm.

Zero-point correction= 0.359211

(Hartree/Particle)

Thermal correction to Energy= 0.381992

Thermal correction to Enthalpy= 0.382936

Thermal correction to Gibbs Free Energy= 0.305466

Sum of electronic and zero-point Energies= -1142.000693

Sum of electronic and thermal Energies= -1141.977912

Sum of electronic and thermal Enthalpies= -1141.976968

Sum of electronic and thermal Free Energies= -1142.054438

PCM-SP (solvent=THF;6-311+g(2d,p)) = -1142.63626637

Corrected Free Energy = -1142.33080044

-----

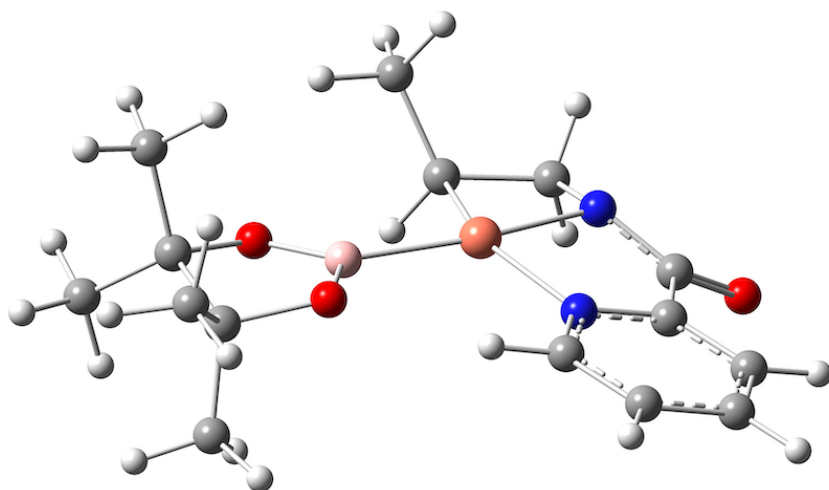

I1      Substrate: N-(2-picolinoyl)-methyl aziridine  
          Path: Markovnikov

# CARTESIAN COORDINATES

|    |           |           |           |
|----|-----------|-----------|-----------|
| N  | 1.781262  | 1.010488  | -0.223980 |
| C  | 3.074491  | 0.684617  | 0.007474  |
| C  | 4.067995  | 1.658077  | 0.074952  |
| C  | 3.715615  | 2.993253  | -0.131877 |
| C  | 2.378209  | 3.318020  | -0.377542 |
| C  | 1.432343  | 2.292247  | -0.404530 |
| C  | 3.363220  | -0.797960 | 0.264021  |
| O  | 4.412765  | -1.150064 | 0.816567  |
| Cu | 0.644335  | -0.702321 | -0.143585 |
| N  | 2.331275  | -1.535701 | -0.169947 |
| C  | 1.922238  | -2.856130 | 0.296693  |
| C  | 0.392902  | -2.642335 | 0.228956  |
| B  | -1.256414 | -0.176246 | -0.004991 |
| O  | -1.638556 | 1.134630  | -0.237266 |
| C  | -3.037486 | 1.277722  | 0.169624  |
| C  | -3.724191 | 2.255943  | -0.778259 |
| O  | -2.332561 | -0.969884 | 0.322414  |
| C  | -3.554197 | -0.204072 | 0.088043  |
| C  | -4.055762 | -0.597311 | -1.307324 |
| C  | -4.582386 | -0.588821 | 1.147437  |
| C  | -3.022051 | 1.839956  | 1.596427  |
| H  | 2.265220  | -3.664990 | -0.365371 |
| H  | -0.123451 | -2.699374 | 1.189599  |
| H  | 5.083474  | 1.344933  | 0.294580  |
| H  | 4.472152  | 3.772793  | -0.095722 |
| H  | 0.372725  | 2.470379  | -0.560366 |
| H  | 2.066250  | 4.345593  | -0.536809 |
| H  | -4.796823 | 2.316801  | -0.557901 |
| H  | -3.294189 | 3.255545  | -0.653551 |
| H  | -3.597246 | 1.961565  | -1.822634 |
| H  | -2.469392 | 2.785103  | 1.599884  |
| H  | -4.036459 | 2.030516  | 1.963909  |
| H  | -2.521972 | 1.152962  | 2.286418  |
| H  | -4.206349 | -1.681214 | -1.336671 |
| H  | -5.006949 | -0.108577 | -1.545598 |
| H  | -3.323806 | -0.336337 | -2.078435 |
| H  | -5.483231 | 0.029652  | 1.053148  |

|   |           |           |           |
|---|-----------|-----------|-----------|
| H | -4.871792 | -1.636651 | 1.015852  |
| H | -4.182286 | -0.474716 | 2.157564  |
| C | -0.338336 | -3.355341 | -0.887260 |
| H | -0.309807 | -4.443298 | -0.708704 |
| H | -1.383670 | -3.041012 | -0.941695 |
| H | 0.139304  | -3.172187 | -1.856684 |
| H | 2.288072  | -3.067114 | 1.310852  |

Electronic Energy = -1142.39413538 (Hartree/Particle)  
Dipole Moment (Debye): 6.9373  
index 0  
Harmonic frequencies  
Number of imaginary frequencies= 0

#### THERMOCHEMICAL DATA

Temperature 298.150 Kelvin. Pressure 1.00000 Atm.  
Zero-point correction= 0.361533  
(Hartree/Particle)  
Thermal correction to Energy= 0.383998  
Thermal correction to Enthalpy= 0.384942  
Thermal correction to Gibbs Free Energy= 0.309154  
Sum of electronic and zero-point Energies= -1142.032603  
Sum of electronic and thermal Energies= -1142.010138  
Sum of electronic and thermal Enthalpies= -1142.009193  
Sum of electronic and thermal Free Energies= -1142.084981  
PCM-SP (solvent=THF;6-311+g(2d,p)) = -1142.67134855  
Corrected Free Energy = -1142.36219417

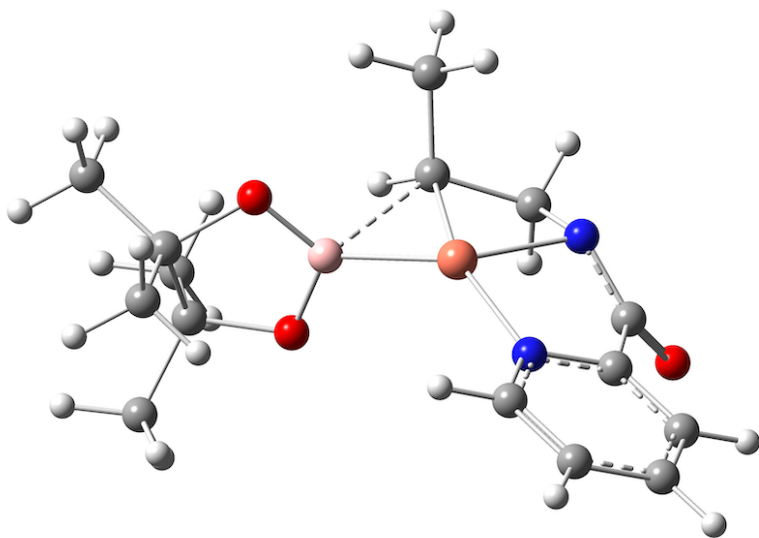

TS2 Substrate: N-(2-picolinoyl)-methyl aziridine  
Path: Markovnikov

#### CARTESIAN COORDINATES

|   |          |          |           |
|---|----------|----------|-----------|
| N | 2.197798 | 0.892005 | -0.362836 |
| C | 3.198238 | 0.175305 | 0.214581  |
| C | 4.433076 | 0.758932 | 0.497797  |
| C | 4.658491 | 2.085599 | 0.135169  |
| C | 3.627854 | 2.811491 | -0.472361 |
| C | 2.407034 | 2.178577 | -0.690584 |

|    |           |           |           |
|----|-----------|-----------|-----------|
| C  | 2.842468  | -1.254275 | 0.652846  |
| O  | 3.347361  | -1.691370 | 1.701168  |
| Cu | 0.618250  | -0.356492 | -0.554583 |
| N  | 1.921203  | -1.774863 | -0.163616 |
| C  | 0.850871  | -2.639019 | 0.346213  |
| C  | -0.434056 | -2.056761 | -0.327910 |
| B  | -1.295602 | -0.162580 | -0.151490 |
| O  | -1.667236 | 0.237534  | 1.112623  |
| C  | -3.106181 | 0.502939  | 1.078066  |
| C  | -3.408221 | 1.667716  | 2.014421  |
| O  | -2.299057 | -0.002935 | -1.082742 |
| C  | -3.349354 | 0.793173  | -0.448676 |
| C  | -3.090904 | 2.254397  | -0.835925 |
| C  | -4.699138 | 0.330852  | -0.987729 |
| C  | -3.800493 | -0.772542 | 1.569988  |
| H  | 0.963405  | -3.697714 | 0.062203  |
| H  | -1.310565 | -2.235578 | 0.303881  |
| H  | 5.180750  | 0.156677  | 1.003055  |
| H  | 5.620031  | 2.554086  | 0.328265  |
| H  | 1.563835  | 2.700184  | -1.133124 |
| H  | 3.759211  | 3.849744  | -0.760751 |
| H  | -4.464339 | 1.954474  | 1.943393  |
| H  | -3.201834 | 1.372307  | 3.048245  |
| H  | -2.790870 | 2.538956  | 1.783920  |
| H  | -3.419221 | -1.022602 | 2.564968  |
| H  | -4.885481 | -0.637026 | 1.636313  |
| H  | -3.599374 | -1.619112 | 0.905280  |
| H  | -3.076260 | 2.334172  | -1.927581 |
| H  | -3.873570 | 2.915688  | -0.448770 |
| H  | -2.122979 | 2.597224  | -0.456071 |
| H  | -5.516437 | 0.844327  | -0.467287 |
| H  | -4.770880 | 0.566686  | -2.054572 |
| H  | -4.831798 | -0.747216 | -0.871076 |
| C  | -0.662941 | -2.600597 | -1.738514 |
| H  | -0.907737 | -3.671065 | -1.676595 |
| H  | -1.482815 | -2.085735 | -2.246187 |
| H  | 0.243127  | -2.505330 | -2.346411 |
| H  | 0.790558  | -2.592550 | 1.441737  |

Electronic Energy = -1142.38486250 (Hartree/Particle)

Dipole Moment (Debye): 7.2577

index 0

Harmonic frequencies

Number of imaginary frequencies= 1

Negatives Eigenvalues: -112.199

#### THERMOCHEMICAL DATA

Temperature 298.150 Kelvin. Pressure 1.00000 Atm.

Zero-point correction= 0.361217

(Hartree/Particle)

Thermal correction to Energy= 0.382847

Thermal correction to Enthalpy= 0.383792

Thermal correction to Gibbs Free Energy= 0.311286

Sum of electronic and zero-point Energies= -1142.023646

Sum of electronic and thermal Energies= -1142.002015

Sum of electronic and thermal Enthalpies= -1142.001071

Sum of electronic and thermal Free Energies= -1142.073576

PCM-SP (solvent=THF;6-311+g(2d,p)) = -1142.66758797

Corrected Free Energy = -1142.35630147

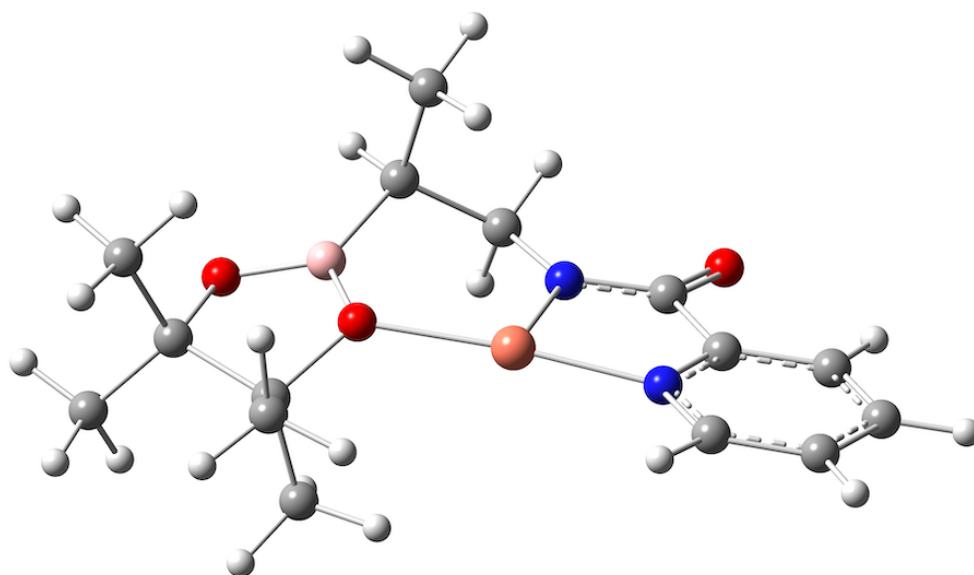

P1      Substrate: N-(2-picolinoyl)-methyl aziridine  
 Path: Markovnikov

#### CARTESIAN COORDINATES

|    |           |           |           |
|----|-----------|-----------|-----------|
| N  | -2.462138 | -0.933162 | -0.196503 |
| C  | -3.147293 | 0.170975  | 0.202296  |
| C  | -4.538010 | 0.143763  | 0.335079  |
| C  | -5.234626 | -1.028245 | 0.046757  |
| C  | -4.522368 | -2.157349 | -0.367803 |
| C  | -3.136845 | -2.063903 | -0.473685 |
| C  | -2.383088 | 1.468221  | 0.513537  |
| O  | -3.046923 | 2.447482  | 0.918982  |
| Cu | -0.540834 | -0.512883 | -0.265586 |
| N  | -1.078407 | 1.359916  | 0.293391  |
| C  | -0.221475 | 2.501601  | 0.534061  |
| C  | 1.087881  | 2.388316  | -0.291952 |
| B  | 1.921755  | 1.078373  | -0.042335 |
| O  | 3.235444  | 1.049060  | 0.336795  |
| C  | 3.757429  | -0.301797 | 0.164849  |
| C  | 4.778845  | -0.573257 | 1.264823  |
| O  | 1.449923  | -0.232407 | -0.264015 |
| C  | 2.461582  | -1.180086 | 0.245879  |
| C  | 2.042322  | -1.530670 | 1.675855  |
| C  | 2.438598  | -2.415554 | -0.642611 |
| C  | 4.429007  | -0.340404 | -1.213073 |
| H  | -0.734548 | 3.440300  | 0.273603  |
| H  | 1.732240  | 3.232266  | -0.007167 |
| H  | -5.027223 | 1.054586  | 0.662571  |
| H  | -6.316780 | -1.063835 | 0.143078  |
| H  | -2.534248 | -2.910350 | -0.787750 |
| H  | -5.022140 | -3.092008 | -0.603130 |
| H  | 5.128124  | -1.611418 | 1.217970  |
| H  | 5.642863  | 0.085515  | 1.132087  |
| H  | 4.361621  | -0.386186 | 2.256823  |
| H  | 5.198038  | 0.437073  | -1.252523 |
| H  | 4.903597  | -1.309731 | -1.399416 |

|   |          |           |           |
|---|----------|-----------|-----------|
| H | 3.706742 | -0.143908 | -2.012232 |
| H | 1.028291 | -1.946010 | 1.656138  |
| H | 2.714420 | -2.275183 | 2.114572  |
| H | 2.030168 | -0.643613 | 2.316331  |
| H | 3.219173 | -3.121225 | -0.336810 |
| H | 1.466793 | -2.912657 | -0.545439 |
| H | 2.583985 | -2.161273 | -1.694706 |
| C | 0.781780 | 2.504452  | -1.806533 |
| H | 0.275973 | 3.454969  | -2.019160 |
| H | 1.692756 | 2.463956  | -2.418099 |
| H | 0.114164 | 1.696643  | -2.127165 |
| H | 0.025221 | 2.577079  | 1.606895  |

Electronic Energy = -1142.46291962 (Hartree/Particle)

Dipole Moment (Debye): 8.8624

index 0

Harmonic frequencies

Number of imaginary frequencies= 0

#### THERMOCHEMICAL DATA

Temperature 298.150 Kelvin. Pressure 1.00000 Atm.

Zero-point correction= 0.363179

(Hartree/Particle)

Thermal correction to Energy= 0.385327

Thermal correction to Enthalpy= 0.386271

Thermal correction to Gibbs Free Energy= 0.312250

Sum of electronic and zero-point Energies= -1142.099741

Sum of electronic and thermal Energies= -1142.077593

Sum of electronic and thermal Enthalpies= -1142.076649

Sum of electronic and thermal Free Energies= -1142.150669

PCM-SP (solvent=THF;6-311+g(2d,p)) = -1142.74378919

Corrected Free Energy = -1142.43153857

-----

SUBSTRATE: 1c

1c

#### CARTESIAN COORDINATES

|   |           |           |           |
|---|-----------|-----------|-----------|
| C | -2.972280 | -1.942506 | 0.233467  |
| C | -2.302083 | -1.440191 | -1.017106 |
| H | -2.352174 | -2.428390 | 0.984127  |
| N | -2.730748 | -0.529033 | 0.026683  |
| C | -1.957973 | 0.237868  | 0.883219  |
| C | -1.100412 | 1.301607  | 0.244185  |
| C | -0.292353 | 2.086294  | 1.076206  |
| C | 0.531914  | 3.046001  | 0.492930  |
| H | -0.322380 | 1.922697  | 2.147550  |
| C | -0.327695 | 2.358978  | -1.639032 |
| C | 0.516080  | 3.189400  | -0.895436 |
| H | 1.178301  | 3.666001  | 1.108385  |
| H | -0.367072 | 2.440565  | -2.723955 |
| H | 1.143062  | 3.921775  | -1.395971 |
| O | -2.018738 | 0.119198  | 2.101652  |
| N | -1.120283 | 1.430622  | -1.092205 |
| H | -4.012749 | -2.259073 | 0.197053  |
| C | -0.830943 | -1.676609 | -1.284332 |

|   |           |           |           |
|---|-----------|-----------|-----------|
| H | -0.456285 | -0.868044 | -1.921453 |
| H | -0.695841 | -2.638422 | -1.800997 |
| O | -0.146524 | -1.683352 | -0.037266 |
| C | 1.177907  | -1.335288 | 0.017545  |
| C | 1.653409  | -0.974033 | 1.285618  |
| C | 2.036614  | -1.337186 | -1.087131 |
| C | 2.988695  | -0.610995 | 1.443111  |
| H | 0.957478  | -0.972752 | 2.119244  |
| C | 3.375229  | -0.964405 | -0.913156 |
| H | 1.680722  | -1.632430 | -2.068607 |
| C | 3.858135  | -0.599642 | 0.344279  |
| H | 3.351367  | -0.327660 | 2.428085  |
| H | 4.040561  | -0.967506 | -1.773069 |
| H | 4.898500  | -0.312901 | 0.470340  |
| H | -2.889643 | -1.377512 | -1.933366 |

Electronic Energy = -839.994211918 (Hartree/Particle)

Dipole Moment (Debye): 4.1141

index 0

Harmonic frequencies

Number of imaginary frequencies= 0

#### THERMOCHEMICAL DATA

Temperature 298.150 Kelvin. Pressure 1.00000 Atm.

Zero-point correction= 0.263916

(Hartree/Particle)

Thermal correction to Energy= 0.279548

Thermal correction to Enthalpy= 0.280492

Thermal correction to Gibbs Free Energy= 0.218680

Sum of electronic and zero-point Energies= -839.730296

Sum of electronic and thermal Energies= -839.714664

Sum of electronic and thermal Enthalpies= -839.713720

Sum of electronic and thermal Free Energies= -839.775531

PCM-SP (solvent=THF;6-311+g(2d,p)) = -840.217420194

Corrected Free Energy = -839.998739276

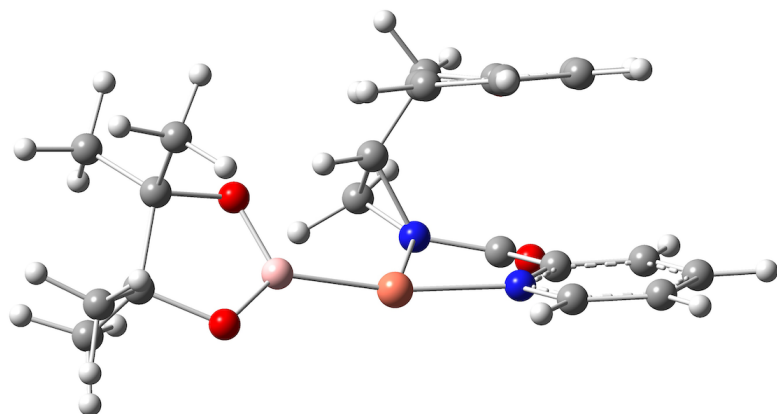

Complex-1 Substrate: 1c

#### CARTESIAN COORDINATES

|   |           |           |          |
|---|-----------|-----------|----------|
| C | -0.672592 | -3.165588 | 1.478305 |
| N | -1.143900 | -2.297956 | 0.424495 |
| C | -2.469124 | -2.226866 | 0.029465 |

|    |           |           |           |
|----|-----------|-----------|-----------|
| O  | -3.269567 | -3.138254 | 0.203813  |
| C  | -0.501938 | -1.674776 | 1.589485  |
| C  | -2.870600 | -1.001196 | -0.757603 |
| C  | -4.237654 | -0.740706 | -0.888412 |
| C  | -4.654967 | 0.366248  | -1.623295 |
| C  | -3.688323 | 1.181386  | -2.212985 |
| C  | -2.346179 | 0.854060  | -2.041343 |
| N  | -1.932588 | -0.214787 | -1.332239 |
| Cu | 0.078993  | -0.345234 | -1.180681 |
| B  | 1.997858  | -0.207229 | -0.800263 |
| O  | 3.093561  | -0.042219 | -1.638881 |
| C  | 4.317688  | -0.187355 | -0.869200 |
| C  | 5.373945  | 0.756605  | -1.439837 |
| O  | 2.438802  | -0.234464 | 0.538472  |
| C  | 3.839771  | 0.152993  | 0.584550  |
| C  | 3.874958  | 1.656292  | 0.896989  |
| C  | 4.533661  | -0.628195 | 1.697645  |
| C  | 4.775527  | -1.644573 | -1.028569 |
| H  | -1.432200 | -3.649361 | 2.091544  |
| H  | 0.478120  | -1.261896 | 1.366426  |
| H  | -4.941067 | -1.414037 | -0.412120 |
| H  | -5.712935 | 0.588340  | -1.732078 |
| H  | -1.560012 | 1.463154  | -2.476261 |
| H  | -3.958805 | 2.058558  | -2.792145 |
| H  | 5.612044  | -0.426248 | 1.701054  |
| H  | 4.128020  | -0.326443 | 2.669960  |
| H  | 4.380211  | -1.704519 | 1.587702  |
| H  | 3.335525  | 1.836776  | 1.833283  |
| H  | 4.900913  | 2.024113  | 1.012651  |
| H  | 3.384045  | 2.230029  | 0.104455  |
| H  | 4.893566  | -1.861508 | -2.095105 |
| H  | 5.733454  | -1.826362 | -0.527283 |
| H  | 4.028677  | -2.336006 | -0.625412 |
| H  | 6.284673  | 0.737078  | -0.827989 |
| H  | 5.637170  | 0.442335  | -2.455471 |
| H  | 5.007786  | 1.784802  | -1.492324 |
| C  | -1.362998 | -0.908948 | 2.583265  |
| H  | -0.716531 | -0.462692 | 3.351429  |
| H  | -2.070561 | -1.583829 | 3.071975  |
| O  | -2.202121 | 0.084734  | 1.996002  |
| C  | -1.689944 | 1.286384  | 1.569541  |
| C  | -2.653474 | 2.233413  | 1.193897  |
| C  | -0.327697 | 1.584194  | 1.458116  |
| C  | -2.254429 | 3.472932  | 0.700389  |
| H  | -3.702935 | 1.970745  | 1.287391  |
| C  | 0.057345  | 2.836218  | 0.962580  |
| H  | 0.442715  | 0.861533  | 1.694704  |
| C  | -0.892599 | 3.783515  | 0.581019  |
| H  | -3.008632 | 4.200043  | 0.409169  |
| H  | 1.117487  | 3.047703  | 0.857533  |
| H  | -0.580822 | 4.749153  | 0.192674  |
| H  | 0.187766  | -3.778956 | 1.220263  |

Electronic Energy = -1448.67011541 (Hartree/Particle)

Dipole Moment (Debye): 3.2139

index 0

Harmonic frequencies

Number of imaginary frequencies= 0

THERMOCHEMICAL DATA

Temperature 298.150 Kelvin. Pressure 1.00000 Atm.  
 Zero-point correction= 0.448049  
 (Hartree/Particle)  
 Thermal correction to Energy= 0.476249  
 Thermal correction to Enthalpy= 0.477193  
 Thermal correction to Gibbs Free Energy= 0.387698  
 Sum of electronic and zero-point Energies= -1448.222067  
 Sum of electronic and thermal Energies= -1448.193867  
 Sum of electronic and thermal Enthalpies= -1448.192923  
 Sum of electronic and thermal Free Energies= -1448.282417  
 PCM-SP (solvent=THF;6-311+g(2d,p)) = -1449.030321190  
 Corrected Free Energy = -1448.64262276

-----

PATH: ANTI\_MARKOVNIKOV

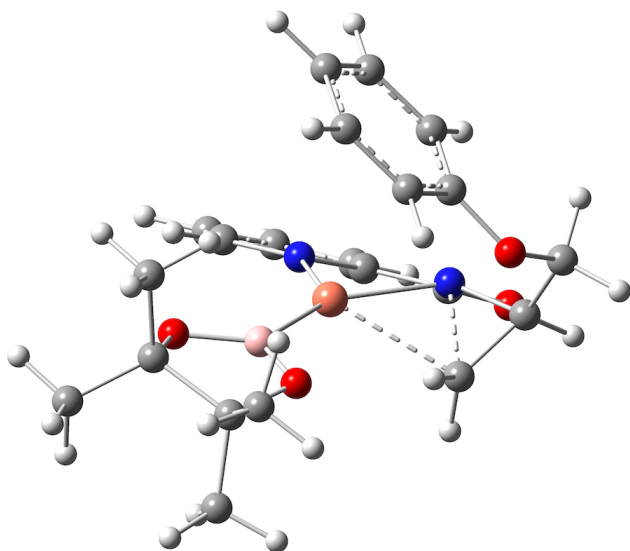

TS1 Substrate: 1c  
 Path: anti-Markovnikov

#### CARTESIAN COORDINATES

|    |           |           |           |
|----|-----------|-----------|-----------|
| N  | -2.291319 | -1.371703 | 0.591008  |
| C  | -3.420292 | -0.994961 | -0.038151 |
| C  | -4.620853 | -1.699748 | 0.089542  |
| C  | -4.648641 | -2.814577 | 0.926908  |
| C  | -3.477999 | -3.196635 | 1.590303  |
| C  | -2.314632 | -2.454045 | 1.379031  |
| C  | -3.334711 | 0.218586  | -0.919769 |
| O  | -4.291466 | 0.583987  | -1.603280 |
| Cu | -0.573845 | -0.386797 | -0.214258 |
| B  | 1.332467  | -0.899835 | -0.298911 |
| O  | 2.013409  | -1.871554 | 0.428860  |
| C  | 3.444536  | -1.679443 | 0.251446  |
| C  | 4.128218  | -3.044964 | 0.244074  |
| N  | -2.108786 | 0.881323  | -0.839832 |
| C  | -0.950318 | 0.848894  | -2.226872 |
| C  | -1.880145 | 1.925827  | -1.828150 |
| O  | 2.221136  | -0.227586 | -1.141621 |

|   |           |           |           |
|---|-----------|-----------|-----------|
| C | 3.512239  | -0.894752 | -1.107781 |
| C | 3.571957  | -1.811323 | -2.337729 |
| C | 4.610527  | 0.163400  | -1.189244 |
| C | 3.930595  | -0.855233 | 1.452162  |
| H | -2.741282 | 2.100018  | -2.477413 |
| H | -1.292925 | 0.106626  | -2.938957 |
| H | 0.118269  | 0.957076  | -2.074576 |
| H | -5.490972 | -1.365310 | -0.465090 |
| H | -5.566674 | -3.380995 | 1.057614  |
| H | -1.367452 | -2.719468 | 1.840383  |
| H | -3.460451 | -4.056049 | 2.253601  |
| H | 5.602310  | -0.293138 | -1.080508 |
| H | 4.568870  | 0.663041  | -2.163402 |
| H | 4.488593  | 0.925424  | -0.415606 |
| H | 3.418420  | -1.205663 | -3.237277 |
| H | 4.540852  | -2.317378 | -2.421220 |
| H | 2.781388  | -2.567587 | -2.300239 |
| H | 3.676417  | -1.390926 | 2.372847  |
| H | 5.015868  | -0.701245 | 1.426935  |
| H | 3.432096  | 0.117568  | 1.483327  |
| H | 5.200081  | -2.942027 | 0.032770  |
| H | 4.017613  | -3.516365 | 1.226701  |
| H | 3.686694  | -3.712460 | -0.499954 |
| C | -1.295320 | 3.236941  | -1.311053 |
| H | -1.219290 | 3.929981  | -2.155482 |
| H | -1.964965 | 3.682646  | -0.564707 |
| O | 0.035029  | 3.122091  | -0.822346 |
| C | 0.307225  | 2.813165  | 0.489757  |
| C | 1.670169  | 2.802602  | 0.816973  |
| C | -0.651002 | 2.517411  | 1.465828  |
| C | 2.070053  | 2.503358  | 2.116379  |
| H | 2.392205  | 3.011631  | 0.034066  |
| C | -0.232871 | 2.217298  | 2.768154  |
| H | -1.703489 | 2.472201  | 1.218121  |
| C | 1.121186  | 2.207811  | 3.103691  |
| H | 3.129637  | 2.495391  | 2.359385  |
| H | -0.982751 | 1.976708  | 3.517718  |
| H | 1.436442  | 1.966051  | 4.114850  |

Electronic Energy = -1448.63550863 (Hartree/Particle)

Dipole Moment (Debye): 2.7296

index 1

Number of imaginary frequencies= 1

Negatives Eigenvalues: -354.111

#### THERMOCHEMICAL DATA

Temperature 298.150 Kelvin. Pressure 1.00000 Atm.

Zero-point correction= 0.445180

(Hartree/Particle)

Thermal correction to Energy= 0.473169

Thermal correction to Enthalpy= 0.474114

Thermal correction to Gibbs Free Energy= 0.383444

Sum of electronic and zero-point Energies= -1448.190329

Sum of electronic and thermal Energies= -1448.162339

Sum of electronic and thermal Enthalpies= -1448.161395

Sum of electronic and thermal Free Energies= -1448.252065

PCM-SP (solvent=THF;6-311+g(2d,p)) = -1448.996090760

Corrected Free Energy = -1448.612647130

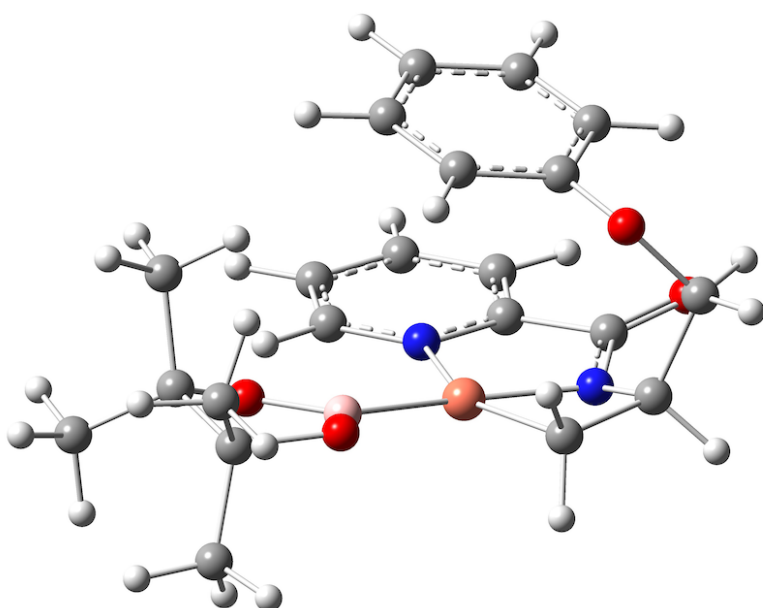

I1      Substrate: 1c  
 Path: anti-Markovnikov

# CARTESIAN COORDINATES

|    |           |           |           |
|----|-----------|-----------|-----------|
| C  | 1.553884  | -2.534828 | -1.172968 |
| C  | 0.009315  | -2.423661 | -1.166077 |
| H  | 1.942091  | -3.164843 | -1.989855 |
| H  | -0.476346 | -2.669574 | -2.111688 |
| H  | -0.515222 | -2.841373 | -0.309064 |
| N  | 1.820199  | -1.117939 | -1.396185 |
| C  | 2.885483  | -0.346167 | -1.179434 |
| C  | 2.425700  | 1.108616  | -1.038206 |
| C  | 3.333243  | 2.160164  | -0.951939 |
| C  | 2.849432  | 3.453459  | -0.748682 |
| H  | 4.391312  | 1.932614  | -1.030752 |
| C  | 0.621358  | 2.553164  | -0.712092 |
| C  | 1.472479  | 3.654996  | -0.621783 |
| H  | 3.536488  | 4.292909  | -0.680066 |
| H  | -0.456204 | 2.630446  | -0.607374 |
| H  | 1.058692  | 4.644113  | -0.451594 |
| O  | 4.080480  | -0.650435 | -1.050325 |
| N  | 1.091870  | 1.316676  | -0.925094 |
| Cu | 0.103567  | -0.459240 | -1.039093 |
| B  | -1.790402 | -0.193976 | -0.569722 |
| O  | -2.730077 | -1.160691 | -0.300658 |
| O  | -2.294007 | 1.082088  | -0.385624 |
| C  | -4.021524 | -0.502314 | -0.118761 |
| C  | -3.595257 | 0.957893  | 0.274234  |
| C  | 2.137712  | -3.095697 | 0.136568  |
| H  | 2.018348  | -4.183030 | 0.148252  |
| H  | 3.204507  | -2.856105 | 0.195210  |
| O  | 1.430815  | -2.658768 | 1.309841  |
| C  | 1.575510  | -1.368479 | 1.762204  |
| C  | 0.402041  | -0.708271 | 2.155124  |
| C  | 2.814301  | -0.729339 | 1.889635  |
| C  | 0.466386  | 0.596486  | 2.647368  |
| H  | -0.545266 | -1.226760 | 2.043493  |

|   |           |           |           |
|---|-----------|-----------|-----------|
| C | 2.863859  | 0.581376  | 2.371156  |
| H | 3.725546  | -1.224749 | 1.575551  |
| C | 1.696940  | 1.252772  | 2.750359  |
| H | -0.450290 | 1.106664  | 2.931011  |
| H | 3.827445  | 1.079326  | 2.443138  |
| H | 1.746518  | 2.273733  | 3.119082  |
| C | -4.805560 | -1.256292 | 0.951013  |
| H | -5.745220 | -0.738155 | 1.177851  |
| H | -5.047484 | -2.261160 | 0.589715  |
| H | -4.230651 | -1.360768 | 1.874118  |
| C | -4.749014 | -0.580476 | -1.466669 |
| H | -4.829902 | -1.630683 | -1.764314 |
| H | -5.757983 | -0.158038 | -1.403340 |
| H | -4.194081 | -0.049438 | -2.246731 |
| C | -3.341633 | 1.131511  | 1.776703  |
| H | -2.850282 | 2.095294  | 1.945370  |
| H | -4.277160 | 1.113926  | 2.346325  |
| H | -2.684681 | 0.344679  | 2.159585  |
| C | -4.511559 | 2.062710  | -0.240908 |
| H | -5.523819 | 1.943140  | 0.163753  |
| H | -4.130492 | 3.038667  | 0.078529  |
| H | -4.568039 | 2.062566  | -1.331882 |

Electronic Energy = -1448.67962787 (Hartree/Particle)  
Dipole Moment (Debye): 6.3387  
index 0  
Harmonic frequencies  
Number of imaginary frequencies= 0

# THERMOCHEMICAL DATA

Temperature 298.150 Kelvin. Pressure 1.00000 Atm.  
Zero-point correction= 0.447803  
(Hartree/Particle)  
Thermal correction to Energy= 0.475187  
Thermal correction to Enthalpy= 0.476132  
Thermal correction to Gibbs Free Energy= 0.390052  
Sum of electronic and zero-point Energies= -1448.231825  
Sum of electronic and thermal Energies= -1448.204440  
Sum of electronic and thermal Enthalpies= -1448.203496  
Sum of electronic and thermal Free Energies= -1448.289576  
PCM-SP (solvent=THF;6-311+g(2d,p)) = -1449.039370430  
Corrected Free Energy = -1448.649318560

-----

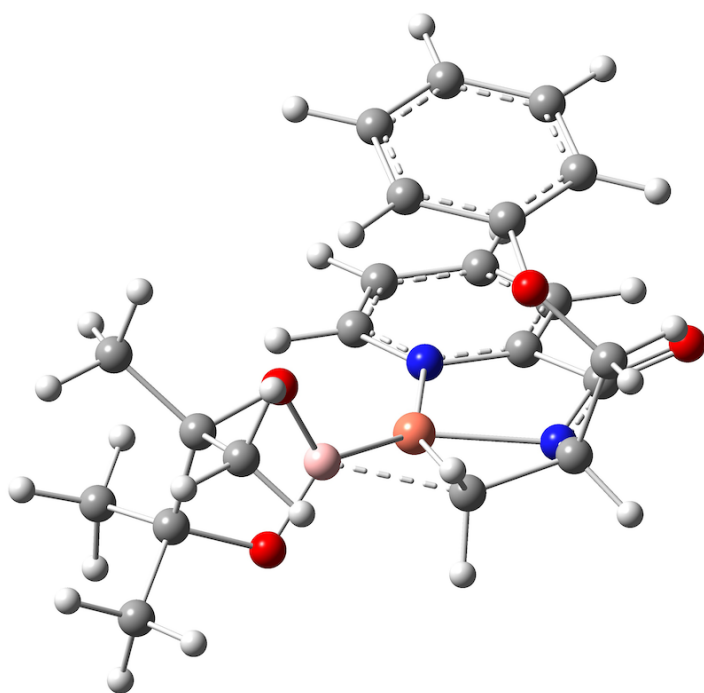

TS2      Substrate: 1c  
             Path: anti-Markovnikov

#### CARTESIAN COORDINATES

|    |           |           |           |
|----|-----------|-----------|-----------|
| C  | 2.762474  | 0.203021  | 2.914445  |
| C  | 1.364116  | 0.254095  | 2.913464  |
| C  | 0.622846  | -0.659388 | 2.162962  |
| C  | 1.281865  | -1.638297 | 1.404807  |
| C  | 2.678892  | -1.718394 | 1.423078  |
| C  | 3.408043  | -0.786970 | 2.167868  |
| O  | 0.468845  | -2.511869 | 0.716488  |
| C  | 0.837770  | -3.004873 | -0.578263 |
| C  | 0.453823  | -2.041783 | -1.718578 |
| Cu | -0.023885 | 0.279332  | -0.962088 |
| B  | -1.923049 | -0.003698 | -0.479176 |
| O  | -2.930854 | 0.539543  | -1.250978 |
| C  | -4.016420 | 0.905911  | -0.344373 |
| C  | -5.342697 | 0.717489  | -1.073390 |
| C  | -0.983825 | -1.419310 | -1.520474 |
| N  | 1.283116  | -0.851868 | -1.831821 |
| C  | 2.554956  | -0.650012 | -1.516776 |
| O  | 3.539030  | -1.411866 | -1.511544 |
| C  | 2.723823  | 0.796778  | -1.007630 |
| C  | 3.989987  | 1.362848  | -0.867131 |
| C  | 4.113496  | 2.640591  | -0.324022 |
| C  | 2.962263  | 3.316377  | 0.088845  |
| C  | 1.729823  | 2.685299  | -0.065759 |
| N  | 1.607188  | 1.462488  | -0.605382 |
| O  | -2.327149 | -0.265396 | 0.811448  |
| C  | -3.775658 | -0.071425 | 0.863268  |
| C  | -4.408556 | -1.453188 | 0.661278  |
| C  | -4.141013 | 0.488751  | 2.233333  |
| C  | -3.810708 | 2.381383  | 0.020685  |
| H  | 0.450650  | -2.647390 | -2.642119 |
| H  | -1.444425 | -1.223976 | -2.491923 |
| H  | -1.625993 | -2.080136 | -0.931644 |

|   |           |           |           |
|---|-----------|-----------|-----------|
| H | 4.846072  | 0.772291  | -1.175911 |
| H | 5.092002  | 3.100684  | -0.213011 |
| H | 0.806110  | 3.157531  | 0.254090  |
| H | 3.011707  | 4.307024  | 0.530068  |
| H | 0.267845  | -3.933384 | -0.685454 |
| H | 1.904621  | -3.236182 | -0.645005 |
| H | -0.459858 | -0.619245 | 2.126356  |
| H | 3.203342  | -2.456619 | 0.829675  |
| H | 0.844078  | 1.016349  | 3.489522  |
| H | 4.493757  | -0.839567 | 2.153626  |
| H | 3.340443  | 0.923017  | 3.487891  |
| H | -5.208791 | 0.734679  | 2.275695  |
| H | -3.930744 | -0.258458 | 3.005525  |
| H | -3.564265 | 1.386774  | 2.466776  |
| H | -4.023251 | -2.134442 | 1.426315  |
| H | -5.499671 | -1.410592 | 0.748839  |
| H | -4.156166 | -1.866304 | -0.320903 |
| H | -3.785988 | 2.973436  | -0.899643 |
| H | -4.623118 | 2.754442  | 0.653634  |
| H | -2.861142 | 2.528309  | 0.545576  |
| H | -6.183236 | 0.894694  | -0.391753 |
| H | -5.414834 | 1.432494  | -1.899442 |
| H | -5.434155 | -0.288610 | -1.489069 |

Electronic Energy = -1448.67004685 (Hartree/Particle)

Dipole Moment (Debye): 6.6134

index 1

Number of imaginary frequencies= 1

Negatives Eigenvalues: -152.728

#### THERMOCHEMICAL DATA

Temperature 298.150 Kelvin. Pressure 1.00000 Atm.

Zero-point correction= 0.446976

(Hartree/Particle)

Thermal correction to Energy= 0.473918

Thermal correction to Enthalpy= 0.474862

Thermal correction to Gibbs Free Energy= 0.389903

Sum of electronic and zero-point Energies= -1448.223071

Sum of electronic and thermal Energies= -1448.196129

Sum of electronic and thermal Enthalpies= -1448.195185

Sum of electronic and thermal Free Energies= -1448.280147

PCM-SP (solvent=THF;6-311+g(2d,p)) = -1449.033067670

Corrected Free Energy = -1448.643167820

-----

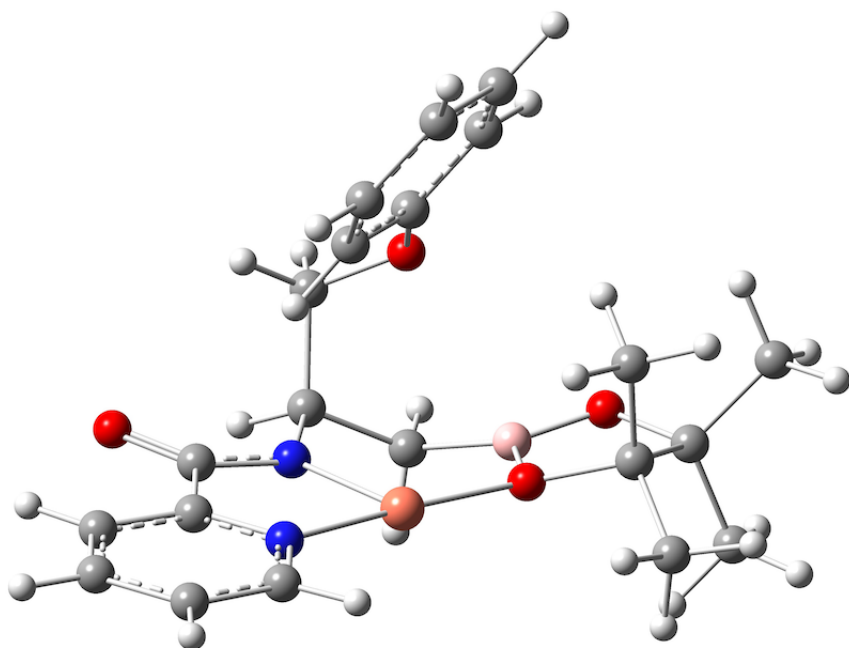

P1 Substrate: 1c  
Path: anti-Markovnikov

# CARTESIAN COORDINATES

|    |           |           |           |
|----|-----------|-----------|-----------|
| C  | -0.048315 | 3.941478  | -1.977978 |
| C  | -1.275774 | 4.092846  | -1.321442 |
| C  | -1.535260 | 3.397449  | -0.139798 |
| C  | -0.570479 | 2.528255  | 0.390055  |
| C  | 0.662516  | 2.375247  | -0.257551 |
| C  | 0.915054  | 3.086564  | -1.434558 |
| O  | -0.943003 | 1.821903  | 1.501215  |
| C  | 0.022460  | 1.487811  | 2.523713  |
| C  | 0.322704  | -0.019112 | 2.564250  |
| Cu | 0.622526  | -1.103700 | -0.374093 |
| B  | -1.837331 | -0.854811 | 1.217260  |
| O  | -1.335445 | -1.202334 | -0.054352 |
| C  | -2.426712 | -1.107145 | -1.045006 |
| C  | -2.243319 | -2.243596 | -2.042816 |
| C  | -0.990346 | -0.838031 | 2.543007  |
| N  | 1.176959  | -0.440140 | 1.471535  |
| C  | 2.481753  | -0.204201 | 1.556445  |
| O  | 3.135468  | 0.325407  | 2.483359  |
| C  | 3.245182  | -0.630804 | 0.295081  |
| C  | 4.637935  | -0.531845 | 0.264226  |
| C  | 5.327654  | -0.902012 | -0.889204 |
| C  | 4.604579  | -1.357061 | -1.995236 |
| C  | 3.216422  | -1.423544 | -1.898727 |
| N  | 2.548489  | -1.071690 | -0.785220 |
| O  | -3.197341 | -0.728103 | 1.167590  |
| C  | -3.689053 | -1.213739 | -0.113796 |
| C  | -4.153407 | -2.656864 | 0.119098  |
| C  | -4.864634 | -0.340729 | -0.543835 |
| C  | -2.273144 | 0.245195  | -1.737629 |
| H  | 0.834678  | -0.184640 | 3.525315  |
| H  | -0.722412 | -1.885854 | 2.751504  |
| H  | -1.643854 | -0.517584 | 3.364903  |
| H  | 5.135295  | -0.161025 | 1.153812  |

|   |           |           |           |
|---|-----------|-----------|-----------|
| H | 6.411774  | -0.834764 | -0.928559 |
| H | 2.606261  | -1.764431 | -2.729041 |
| H | 5.098091  | -1.652746 | -2.915926 |
| H | -0.445647 | 1.795508  | 3.466458  |
| H | 0.946269  | 2.057290  | 2.387077  |
| H | -2.479400 | 3.505866  | 0.386670  |
| H | 1.397055  | 1.687458  | 0.139889  |
| H | -2.031745 | 4.762008  | -1.725436 |
| H | 1.873654  | 2.958351  | -1.931773 |
| H | 0.155188  | 4.487105  | -2.895435 |
| H | -5.217393 | -0.631612 | -1.540290 |
| H | -5.690388 | -0.467346 | 0.163582  |
| H | -4.593193 | 0.716975  | -0.560936 |
| H | -4.914014 | -2.659474 | 0.905880  |
| H | -4.588373 | -3.090555 | -0.787788 |
| H | -3.324729 | -3.292029 | 0.449040  |
| H | -1.265199 | 0.317021  | -2.161415 |
| H | -3.001359 | 0.357275  | -2.547624 |
| H | -2.392356 | 1.072699  | -1.037673 |
| H | -3.065923 | -2.253556 | -2.766597 |
| H | -1.305624 | -2.092739 | -2.589840 |
| H | -2.193716 | -3.216986 | -1.549916 |

Electronic Energy = -1448.75568260 (Hartree/Particle)  
Dipole Moment (Debye): 7.6320  
index 0  
Harmonic frequencies  
Number of imaginary frequencies= 0

# THERMOCHEMICAL DATA

Temperature 298.150 Kelvin. Pressure 1.00000 Atm.  
Zero-point correction= 0.449187  
(Hartree/Particle)  
Thermal correction to Energy= 0.476571  
Thermal correction to Enthalpy= 0.477515  
Thermal correction to Gibbs Free Energy= 0.390519  
Sum of electronic and zero-point Energies= -1448.306495  
Sum of electronic and thermal Energies= -1448.279111  
Sum of electronic and thermal Enthalpies= -1448.278167  
Sum of electronic and thermal Free Energies= -1448.365164  
PCM-SP (solvent=THF;6-311+g(2d,p)) = -1449.11747741  
Corrected Free Energy = -1448.72695881

-----  
PATH: MARKOVNIKOV

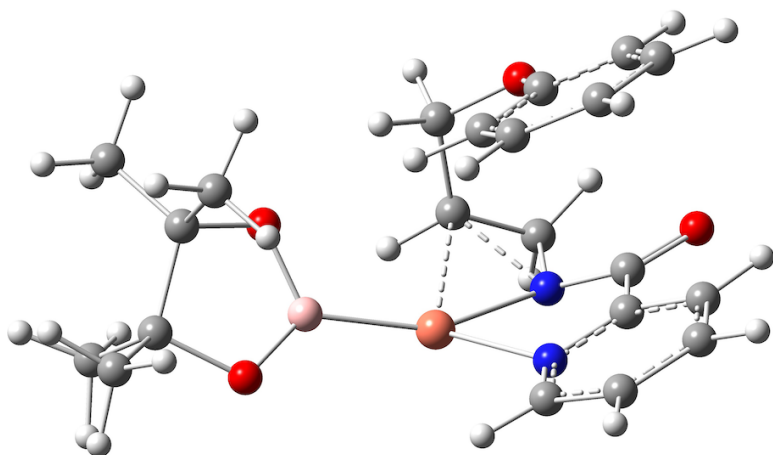

TS1      Substrate: 1c  
             Path: Markovnikov

# CARTESIAN COORDINATES

|    |           |           |           |
|----|-----------|-----------|-----------|
| C  | -1.539071 | -3.219791 | -0.940023 |
| N  | -1.497699 | -1.820718 | -1.343657 |
| C  | -2.643205 | -1.070986 | -1.052892 |
| O  | -3.728369 | -1.557097 | -0.748347 |
| C  | -0.358641 | -2.671925 | -0.247513 |
| C  | -2.482551 | 0.408716  | -1.251461 |
| C  | -3.551502 | 1.273344  | -1.006355 |
| C  | -3.361162 | 2.638075  | -1.213195 |
| C  | -2.112495 | 3.092770  | -1.647103 |
| C  | -1.091884 | 2.161698  | -1.842005 |
| N  | -1.277590 | 0.848614  | -1.655983 |
| Cu | 0.219586  | -0.594883 | -1.334917 |
| B  | 2.044159  | -0.193478 | -0.688605 |
| O  | 3.056997  | 0.571332  | -1.257198 |
| C  | 4.232022  | 0.530664  | -0.399565 |
| C  | 4.936621  | 1.883685  | -0.466210 |
| O  | 2.425076  | -0.575314 | 0.611436  |
| C  | 3.612040  | 0.174370  | 0.995135  |
| C  | 3.123362  | 1.404304  | 1.774884  |
| C  | 4.484804  | -0.700501 | 1.890914  |
| C  | 5.151497  | -0.568230 | -0.951006 |
| H  | -2.401069 | -3.475072 | -0.323064 |
| H  | 0.618844  | -2.874188 | -0.676276 |
| H  | -4.488927 | 0.862177  | -0.650254 |
| H  | -4.170449 | 3.339208  | -1.028985 |
| H  | -0.092138 | 2.455976  | -2.149126 |
| H  | -1.925890 | 4.147756  | -1.823884 |
| H  | 5.431023  | -0.196129 | 2.123239  |
| H  | 3.964521  | -0.899333 | 2.834474  |
| H  | 4.707370  | -1.660972 | 1.419706  |
| H  | 2.519943  | 1.069481  | 2.625353  |
| H  | 3.958706  | 2.002199  | 2.156759  |
| H  | 2.494888  | 2.042049  | 1.144456  |
| H  | 5.375429  | -0.346917 | -1.999551 |
| H  | 6.095795  | -0.622856 | -0.396842 |
| H  | 4.661550  | -1.546332 | -0.910108 |
| H  | 5.778350  | 1.918542  | 0.236852  |
| H  | 5.327772  | 2.045694  | -1.476361 |

|   |           |           |           |
|---|-----------|-----------|-----------|
| H | 4.253136  | 2.704572  | -0.235553 |
| C | -0.328779 | -2.388779 | 1.232940  |
| H | 0.512281  | -1.737232 | 1.476755  |
| H | -0.153527 | -3.360476 | 1.720537  |
| O | -1.566105 | -1.927303 | 1.750422  |
| C | -1.787810 | -0.580650 | 1.934959  |
| C | -3.089133 | -0.252092 | 2.339597  |
| C | -0.832024 | 0.424850  | 1.747645  |
| C | -3.430656 | 1.079487  | 2.562689  |
| H | -3.814496 | -1.051577 | 2.451452  |
| C | -1.193824 | 1.758589  | 1.972720  |
| H | 0.172714  | 0.199970  | 1.411299  |
| C | -2.484160 | 2.096708  | 2.380634  |
| H | -4.443381 | 1.324569  | 2.873234  |
| H | -0.448283 | 2.534027  | 1.814762  |
| H | -2.753684 | 3.135854  | 2.548710  |
| H | -1.363748 | -3.926068 | -1.753743 |

Electronic Energy = -1448.64018835 (Hartree/Particle)

Dipole Moment (Debye): 2.2655

index 1

Number of imaginary frequencies= 1

Negatives Eigenvalues: -319.822

#### THERMOCHEMICAL DATA

Temperature 298.150 Kelvin. Pressure 1.00000 Atm.

Zero-point correction= 0.445787  
(Hartree/Particle)

Thermal correction to Energy= 0.473495

Thermal correction to Enthalpy= 0.474439

Thermal correction to Gibbs Free Energy= 0.386458

Sum of electronic and zero-point Energies= -1448.194401

Sum of electronic and thermal Energies= -1448.166693

Sum of electronic and thermal Enthalpies= -1448.165749

Sum of electronic and thermal Free Energies= -1448.253731

PCM-SP (solvent=THF;6-311+g(2d,p)) = -1448.999723900

Corrected Free Energy = -1448.613266550

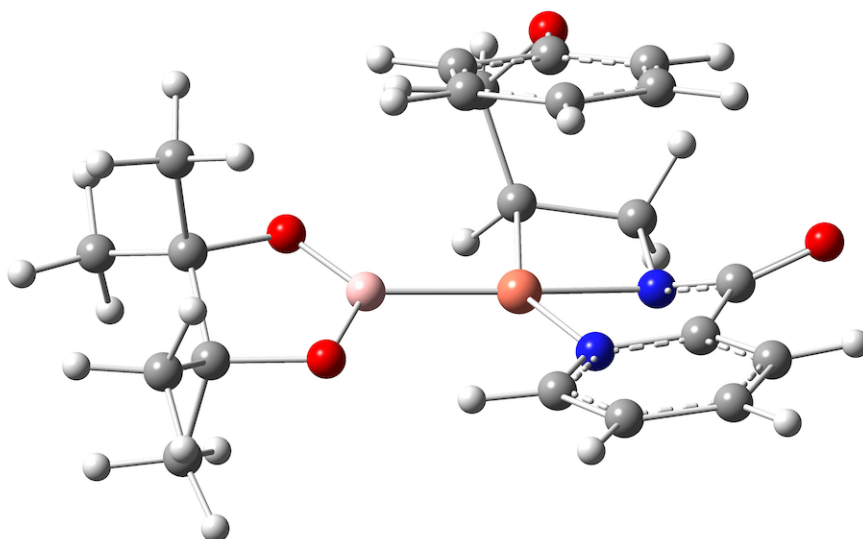

I1 Substrate: 1c  
Path: Markovnikov

# CARTESIAN COORDINATES

|    |           |           |           |
|----|-----------|-----------|-----------|
| C  | -1.428552 | 0.783966  | 2.961970  |
| C  | -2.522516 | 0.070286  | 2.460296  |
| C  | -2.336254 | -1.158196 | 1.824283  |
| C  | -1.045633 | -1.681231 | 1.686717  |
| C  | 0.054373  | -0.984665 | 2.206116  |
| C  | -0.143821 | 0.247562  | 2.834591  |
| O  | -0.929703 | -2.906657 | 1.072728  |
| C  | 0.074298  | -3.079084 | 0.057429  |
| C  | -0.237905 | -2.350303 | -1.237568 |
| Cu | -0.316172 | -0.373191 | -1.043184 |
| B  | 1.567790  | -0.056663 | -0.549372 |
| O  | 2.550517  | -0.974385 | -0.250103 |
| C  | 3.735295  | -0.248111 | 0.205227  |
| C  | 4.974873  | -0.983010 | -0.295277 |
| C  | -1.705885 | -2.402463 | -1.719998 |
| N  | -1.975892 | -0.967064 | -1.700351 |
| C  | -3.050389 | -0.340789 | -1.203542 |
| C  | -2.671726 | 1.090734  | -0.813390 |
| C  | -3.630083 | 2.054738  | -0.514170 |
| C  | -3.206076 | 3.319273  | -0.101847 |
| C  | -1.837552 | 3.575858  | 0.017611  |
| C  | -0.934395 | 2.555484  | -0.282527 |
| N  | -1.348703 | 1.351188  | -0.697627 |
| O  | -4.198363 | -0.763311 | -1.013179 |
| O  | 2.050144  | 1.239434  | -0.513102 |
| C  | 3.508851  | 1.177622  | -0.416674 |
| C  | 4.048082  | 1.311782  | -1.845954 |
| C  | 3.988762  | 2.343470  | 0.442310  |
| C  | 3.700053  | -0.252360 | 1.738027  |
| H  | -2.357260 | -2.958892 | -1.035282 |
| H  | 0.514108  | -2.580888 | -1.996299 |
| H  | -4.677430 | 1.783524  | -0.597787 |
| H  | -3.932613 | 4.093188  | 0.132008  |
| H  | 0.140648  | 2.675944  | -0.196265 |
| H  | -1.469832 | 4.543855  | 0.343695  |
| H  | 5.882989  | -0.419477 | -0.049385 |
| H  | 5.040938  | -1.964134 | 0.186605  |
| H  | 4.941137  | -1.140068 | -1.375788 |
| H  | 3.654899  | -1.287681 | 2.091323  |
| H  | 4.595587  | 0.216878  | 2.159573  |
| H  | 2.819750  | 0.275648  | 2.115282  |
| H  | 3.678548  | 2.247169  | -2.278117 |
| H  | 5.143424  | 1.330253  | -1.861730 |
| H  | 3.701853  | 0.487831  | -2.477920 |
| H  | 5.070531  | 2.279381  | 0.610530  |
| H  | 3.779495  | 3.288761  | -0.069580 |
| H  | 3.484675  | 2.364933  | 1.411449  |
| H  | 1.070257  | -2.811523 | 0.421846  |
| H  | 0.057554  | -4.161394 | -0.130454 |
| H  | -3.172334 | -1.699819 | 1.394246  |
| H  | 1.051241  | -1.398076 | 2.108580  |
| H  | -3.526622 | 0.477785  | 2.541706  |
| H  | 0.713230  | 0.790321  | 3.226593  |
| H  | -1.575649 | 1.746117  | 3.445054  |
| H  | -1.810454 | -2.826653 | -2.727383 |

Electronic Energy = -1448.68016741 (Hartree/Particle)

Dipole Moment (Debye): 7.7856  
 index 0  
 Harmonic frequencies  
 Number of imaginary frequencies= 0

# THERMOCHEMICAL DATA

Temperature 298.150 Kelvin. Pressure 1.00000 Atm.  
 Zero-point correction= 0.448298  
 (Hartree/Particle)  
 Thermal correction to Energy= 0.475662  
 Thermal correction to Enthalpy= 0.476606  
 Thermal correction to Gibbs Free Energy= 0.390666  
 Sum of electronic and zero-point Energies= -1448.231870  
 Sum of electronic and thermal Energies= -1448.204505  
 Sum of electronic and thermal Enthalpies= -1448.203561  
 Sum of electronic and thermal Free Energies= -1448.289502  
 PCM-SP (solvent=THF;6-311+g(2d,p)) = -1449.04101926  
 Corrected Free Energy = -1448.650353850

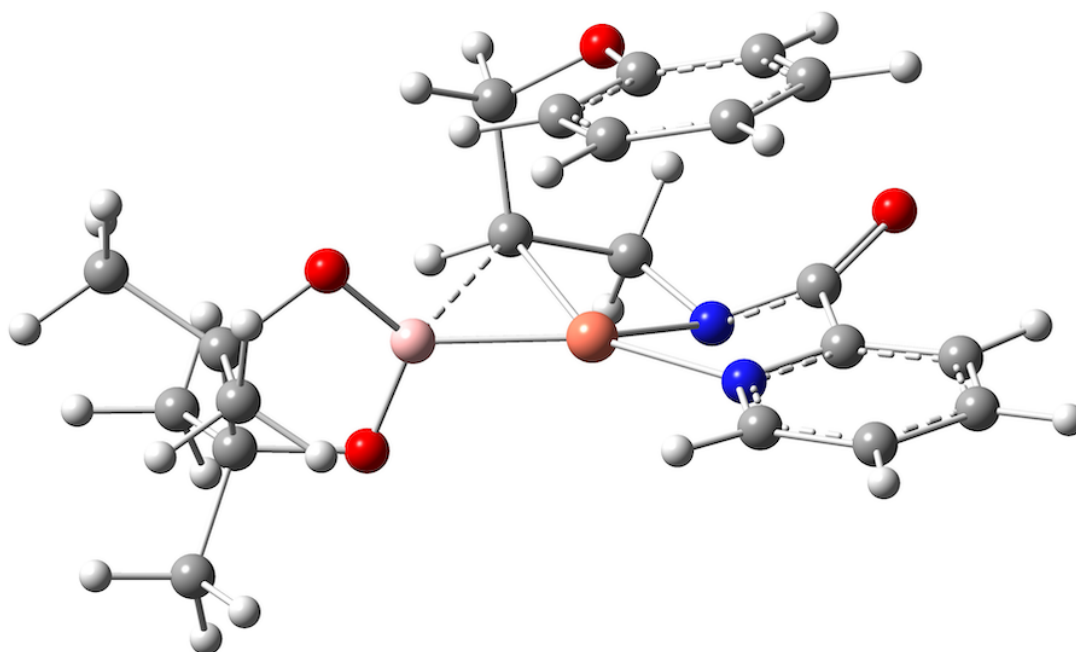

TS2 Substrate: 1c  
 Path: Markovnikov

## CARTESIAN COORDINATES

|    |           |           |           |
|----|-----------|-----------|-----------|
| C  | -2.608680 | 1.650478  | 2.384837  |
| C  | -3.340835 | 0.479817  | 2.145806  |
| C  | -2.692444 | -0.740353 | 1.969959  |
| C  | -1.293223 | -0.799684 | 2.031609  |
| C  | -0.547674 | 0.364487  | 2.269157  |
| C  | -1.216409 | 1.582334  | 2.444999  |
| O  | -0.748238 | -2.049051 | 1.867634  |
| C  | 0.600296  | -2.189937 | 1.424443  |
| C  | 0.795546  | -1.920119 | -0.075970 |
| Cu | -0.090813 | -0.177955 | -0.674358 |
| B  | 1.836120  | -0.155208 | -0.271237 |

|   |           |           |           |
|---|-----------|-----------|-----------|
| O | 2.480294  | 0.145262  | 0.910408  |
| C | 3.723072  | 0.832320  | 0.560205  |
| C | 4.784582  | 0.469676  | 1.593118  |
| C | -0.279437 | -2.664462 | -0.963874 |
| N | -1.142497 | -1.613390 | -1.476431 |
| C | -2.437747 | -1.456807 | -1.218338 |
| C | -2.789568 | 0.042555  | -1.301000 |
| C | -4.097329 | 0.470648  | -1.525369 |
| C | -4.377127 | 1.836461  | -1.530372 |
| C | -3.343972 | 2.742735  | -1.276370 |
| C | -2.067171 | 2.241976  | -1.029920 |
| N | -1.790428 | 0.930019  | -1.055350 |
| O | -3.326132 | -2.264353 | -0.893941 |
| O | 2.639468  | 0.017869  | -1.375105 |
| C | 3.994843  | 0.295515  | -0.892990 |
| C | 4.745399  | -1.040909 | -0.914418 |
| C | 4.653519  | 1.293702  | -1.838100 |
| C | 3.420797  | 2.335051  | 0.606063  |
| H | -0.813081 | -3.407453 | -0.354496 |
| H | 1.801424  | -2.267939 | -0.339942 |
| H | -4.862166 | -0.283695 | -1.677350 |
| H | -5.387065 | 2.191859  | -1.718705 |
| H | -1.234857 | 2.899121  | -0.797390 |
| H | -3.519747 | 3.813845  | -1.255112 |
| H | 5.754996  | 0.894716  | 1.310590  |
| H | 4.504262  | 0.877290  | 2.569916  |
| H | 4.893147  | -0.612377 | 1.697183  |
| H | 3.043905  | 2.590207  | 1.601602  |
| H | 4.319326  | 2.930198  | 0.411362  |
| H | 2.654213  | 2.605794  | -0.127059 |
| H | 4.713155  | -1.449816 | -1.929033 |
| H | 5.793617  | -0.915436 | -0.622279 |
| H | 4.283890  | -1.768805 | -0.238769 |
| H | 5.637159  | 1.592489  | -1.456365 |
| H | 4.792667  | 0.833486  | -2.821613 |
| H | 4.040382  | 2.188271  | -1.968638 |
| H | 1.288870  | -1.602456 | 2.038225  |
| H | 0.816471  | -3.250586 | 1.597924  |
| H | -3.240057 | -1.646104 | 1.732211  |
| H | 0.534094  | 0.338444  | 2.306448  |
| H | -4.424698 | 0.518702  | 2.075704  |
| H | -0.631747 | 2.481865  | 2.624151  |
| H | -3.119351 | 2.601004  | 2.513161  |
| H | 0.222888  | -3.183021 | -1.789506 |

Electronic Energy = -1448.66478263 (Hartree/Particle)

Dipole Moment (Debye): 8.3356

index 1

Number of imaginary frequencies= 1

Negatives Eigenvalues: -140.390

#### THERMOCHEMICAL DATA

Temperature 298.150 Kelvin. Pressure 1.00000 Atm.

Zero-point correction= 0.447377

(Hartree/Particle)

Thermal correction to Energy= 0.474279

Thermal correction to Enthalpy= 0.475223

Thermal correction to Gibbs Free Energy= 0.390899

Sum of electronic and zero-point Energies= -1448.217405

```

Sum of electronic and thermal Energies=          -1448.190504
Sum of electronic and thermal Enthalpies=        -1448.189560
Sum of electronic and thermal Free Energies=      -1448.273884
PCM-SP (solvent=THF;6-311+g(2d,p)) =  -1449.030306880
Corrected Free Energy =  -1448.639408250

```

---

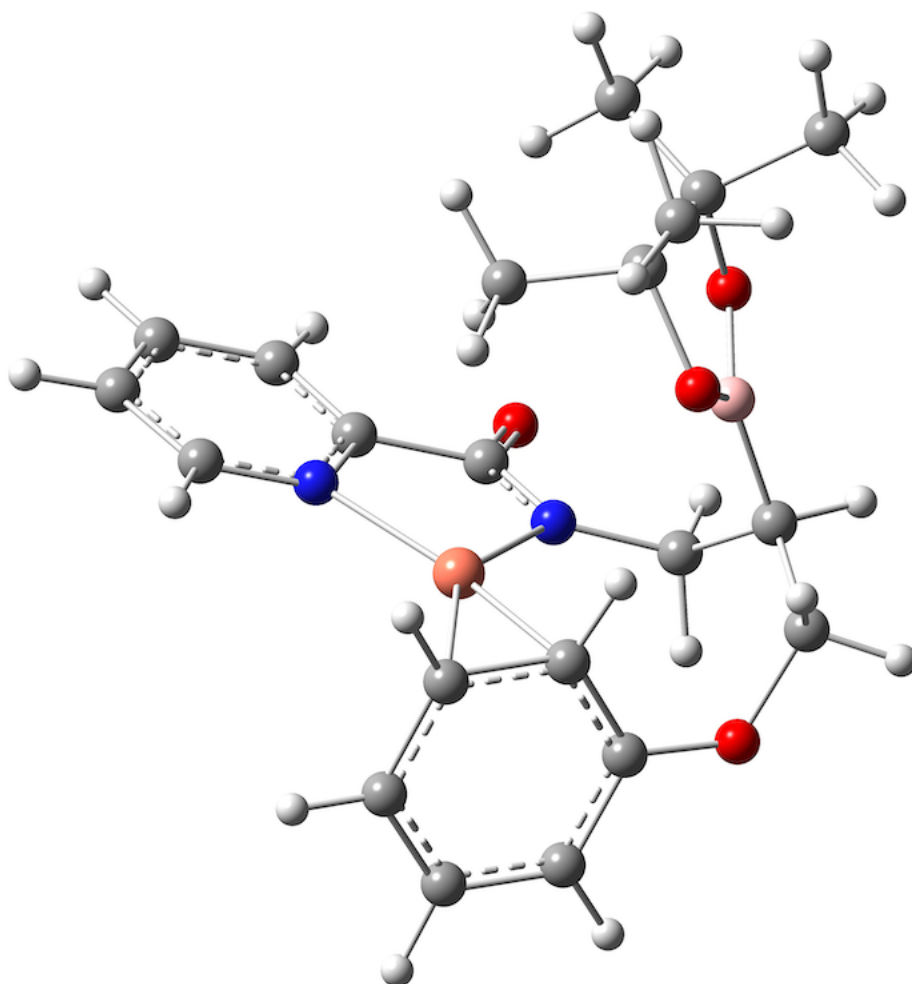

P1      Substrate: 1c  
          Path: Markovnikov

#### CARTESIAN COORDINATES

|    |           |           |           |
|----|-----------|-----------|-----------|
| C  | -3.720677 | -1.064927 | 1.660248  |
| C  | -4.284119 | -1.700216 | 0.560295  |
| C  | -3.488324 | -2.399862 | -0.365100 |
| C  | -2.107940 | -2.476668 | -0.190124 |
| C  | -1.501859 | -1.863195 | 0.947081  |
| C  | -2.319055 | -1.136806 | 1.858339  |
| O  | -1.405655 | -3.124084 | -1.149974 |
| C  | 0.032711  | -3.210205 | -1.095218 |
| C  | 0.819114  | -1.982362 | -1.658552 |
| Cu | -1.308521 | 0.082452  | 0.332527  |
| B  | 1.787618  | -1.296943 | -0.618496 |
| O  | 1.757550  | -1.514107 | 0.745628  |
| C  | 2.631471  | -0.523752 | 1.365677  |
| C  | 3.309506  | -1.161446 | 2.574277  |
| C  | -0.018159 | -0.857133 | -2.340479 |
| N  | -0.391429 | 0.211415  | -1.414576 |

|   |           |           |           |
|---|-----------|-----------|-----------|
| C | -0.218931 | 1.470287  | -1.838132 |
| C | -0.650742 | 2.522177  | -0.813862 |
| C | -0.426116 | 3.877891  | -1.066747 |
| C | -0.830351 | 4.821917  | -0.123856 |
| C | -1.458318 | 4.389248  | 1.048440  |
| C | -1.652634 | 3.021304  | 1.228367  |
| N | -1.256477 | 2.112115  | 0.323621  |
| O | 0.232672  | 1.883079  | -2.924705 |
| O | 2.785216  | -0.434841 | -0.991642 |
| C | 3.596475  | -0.141586 | 0.178001  |
| C | 4.836422  | -1.040188 | 0.091122  |
| C | 4.002208  | 1.329282  | 0.128757  |
| C | 1.734994  | 0.638155  | 1.810102  |
| H | -0.921983 | -1.291901 | -2.787570 |
| H | 1.458117  | -2.385122 | -2.457609 |
| H | 0.056522  | 4.146310  | -2.000064 |
| H | -0.662531 | 5.881443  | -0.299261 |
| H | -2.139129 | 2.626925  | 2.116223  |
| H | -1.794176 | 5.090724  | 1.806028  |
| H | 4.038755  | -0.471161 | 3.014539  |
| H | 2.559013  | -1.396509 | 3.336826  |
| H | 3.821755  | -2.088822 | 2.307420  |
| H | 0.956136  | 0.252570  | 2.477304  |
| H | 2.305422  | 1.403029  | 2.347768  |
| H | 1.240333  | 1.102460  | 0.953912  |
| H | 5.349439  | -0.842064 | -0.855210 |
| H | 5.533980  | -0.845477 | 0.913199  |
| H | 4.559288  | -2.099459 | 0.110048  |
| H | 4.541329  | 1.613663  | 1.040578  |
| H | 4.662181  | 1.497647  | -0.728241 |
| H | 3.132873  | 1.980056  | 0.011561  |
| H | 0.342457  | -3.455145 | -0.073602 |
| H | 0.235958  | -4.088247 | -1.712121 |
| H | -3.926800 | -2.872796 | -1.238224 |
| H | -0.467345 | -2.074201 | 1.200710  |
| H | -5.358218 | -1.654111 | 0.400151  |
| H | -1.887740 | -0.795549 | 2.797124  |
| H | -4.341485 | -0.527748 | 2.370935  |
| H | 0.577893  | -0.429498 | -3.152805 |

Electronic Energy = -1448.75207130 (Hartree/Particle)

Dipole Moment (Debye): 6.8666

index 0

Harmonic frequencies

Number of imaginary frequencies= 0

#### THERMOCHEMICAL DATA

Temperature 298.150 Kelvin. Pressure 1.00000 Atm.

Zero-point correction= 0.449885

(Hartree/Particle)

Thermal correction to Energy= 0.476964

Thermal correction to Enthalpy= 0.477908

Thermal correction to Gibbs Free Energy= 0.392388

Sum of electronic and zero-point Energies= -1448.302186

Sum of electronic and thermal Energies= -1448.275108

Sum of electronic and thermal Enthalpies= -1448.274163

Sum of electronic and thermal Free Energies= -1448.359683

PCM-SP (solvent=THF;6-311+g(2d,p)) = -1449.11552297

Corrected Free Energy = -1448.72313467

-----  
-----  
MODEL: Az-(Cu2Cl)-Bpin

THF-(Cu2Cl)-Bpin complex

CARTESIAN COORDINATES

|    |           |           |           |
|----|-----------|-----------|-----------|
| Cu | -0.833728 | 1.102582  | 0.105023  |
| Cu | -0.540900 | -1.170849 | -0.063251 |
| B  | 1.036585  | 0.290464  | 0.036155  |
| O  | 1.818024  | 0.099455  | 1.160279  |
| O  | 1.801216  | 0.468626  | -1.100956 |
| C  | 3.188111  | -0.142964 | 0.708316  |
| C  | 3.202355  | 0.566217  | -0.692600 |
| C  | 3.530706  | 2.062475  | -0.615138 |
| H  | 4.586187  | 2.228223  | -0.372808 |
| H  | 3.320842  | 2.522278  | -1.586165 |
| H  | 2.914847  | 2.563176  | 0.138972  |
| C  | 4.064802  | -0.113883 | -1.751291 |
| H  | 4.005551  | 0.445233  | -2.690900 |
| H  | 5.113885  | -0.139841 | -1.432666 |
| H  | 3.731101  | -1.135648 | -1.945322 |
| C  | 3.348567  | -1.666244 | 0.621561  |
| H  | 4.369566  | -1.946238 | 0.340268  |
| H  | 3.123927  | -2.102024 | 1.599941  |
| H  | 2.651255  | -2.096990 | -0.104297 |
| C  | 4.152848  | 0.437275  | 1.737312  |
| H  | 4.062131  | -0.113976 | 2.678896  |
| H  | 5.187665  | 0.347092  | 1.385561  |
| H  | 3.942047  | 1.489886  | 1.940494  |
| Cl | -1.653706 | -2.988961 | -0.225159 |
| O  | -2.689389 | 1.853829  | 0.145814  |
| C  | -3.487459 | 1.316948  | 1.246945  |
| C  | -3.451626 | 1.528327  | -1.058133 |
| C  | -4.029126 | -0.025217 | 0.733120  |
| H  | -2.828643 | 1.244069  | 2.114528  |
| H  | -4.283184 | 2.043923  | 1.453239  |
| C  | -3.989603 | 0.111485  | -0.816752 |
| H  | -4.250477 | 2.275568  | -1.147483 |
| H  | -2.769346 | 1.622981  | -1.905289 |
| H  | -5.036689 | -0.215267 | 1.114808  |
| H  | -3.382203 | -0.852155 | 1.040718  |
| H  | -4.971966 | -0.023291 | -1.279068 |
| H  | -3.308470 | -0.639028 | -1.229035 |

Electronic Energy = -1498.79415092 (Hartree/Particle)

Dipole Moment (Debye): 6.7869

index 0

Harmonic frequencies

Number of imaginary frequencies= 0

THERMOCHEMICAL DATA

Temperature 298.150 Kelvin. Pressure 1.00000 Atm.

Zero-point correction= 0.303731

(Hartree/Particle)

Thermal correction to Energy= 0.325086

Thermal correction to Enthalpy= 0.326030  
 Thermal correction to Gibbs Free Energy= 0.249514  
 Sum of electronic and zero-point Energies= -1498.490420  
 Sum of electronic and thermal Energies= -1498.469065  
 Sum of electronic and thermal Enthalpies= -1498.468121  
 Sum of electronic and thermal Free Energies= -1498.544637  
 PCM-SP (solvent=THF;6-311+g(2d,p)) = -1499.03284364  
 Corrected Free Energy = -1498.78332972

-----

Cl-Cu-THF

# CARTESIAN COORDINATES

|    |           |           |           |
|----|-----------|-----------|-----------|
| Cu | 1.062744  | 0.000000  | 0.000000  |
| Cl | 3.157013  | 0.000000  | 0.000000  |
| O  | -0.862046 | 0.000000  | 0.000000  |
| C  | -1.657972 | 1.213414  | 0.000000  |
| C  | -1.657973 | -1.213414 | 0.000000  |
| C  | -3.132607 | 0.776735  | 0.000000  |
| H  | -1.377069 | 1.783257  | 0.890423  |
| H  | -1.377069 | 1.783257  | -0.890423 |
| C  | -3.132606 | -0.776734 | 0.000000  |
| H  | -1.377070 | -1.783257 | -0.890423 |
| H  | -1.377069 | -1.783258 | 0.890422  |
| H  | -3.649301 | 1.167712  | -0.880917 |
| H  | -3.649301 | 1.167713  | 0.880917  |
| H  | -3.649302 | -1.167712 | -0.880916 |
| H  | -3.649301 | -1.167712 | 0.880917  |

Electronic Energy = -890.093411832 (Hartree/Particle)  
 Dipole Moment (Debye): 10.0129  
 index 0  
 Harmonic frequencies  
 Number of imaginary frequencies= 2  
 Negatives Eigenvalues: -196.601  
 -193.939

# THERMOCHEMICAL DATA

Temperature 298.150 Kelvin. Pressure 1.00000 Atm.  
 Zero-point correction= 0.120025  
 (Hartree/Particle)  
 Thermal correction to Energy= 0.127414  
 Thermal correction to Enthalpy= 0.128359  
 Thermal correction to Gibbs Free Energy= 0.084918  
 Sum of electronic and zero-point Energies= -889.973386  
 Sum of electronic and thermal Energies= -889.965997  
 Sum of electronic and thermal Enthalpies= -889.965053  
 Sum of electronic and thermal Free Energies= -890.008494  
 PCM-SP (solvent=THF;6-311+g(2d,p)) = -890.210751525  
 Corrected Free Energy = -890.125833693

-----

THF

# CARTESIAN COORDINATES

|   |           |           |           |
|---|-----------|-----------|-----------|
| C | 1.110010  | -0.503453 | 0.199533  |
| O | -0.032909 | -1.209485 | -0.279624 |
| C | -1.166880 | -0.427611 | 0.103690  |
| C | -0.725575 | 1.057410  | 0.015153  |
| C | 0.819692  | 0.972490  | -0.115508 |
| H | 1.224249  | -0.661468 | 1.286536  |
| H | 1.989161  | -0.909054 | -0.308634 |
| H | -1.987023 | -0.688794 | -0.570743 |
| H | -1.462949 | -0.688033 | 1.133022  |
| H | -1.170085 | 1.558784  | -0.850285 |
| H | -1.030421 | 1.611974  | 0.909101  |
| H | 1.133082  | 1.202613  | -1.139318 |
| H | 1.343769  | 1.656845  | 0.560099  |

Electronic Energy = -232.466403941 (Hartree/Particle)  
Dipole Moment (Debye): 1.8228  
index 0  
Harmonic frequencies  
Number of imaginary frequencies= 0

#### THERMOCHEMICAL DATA

Temperature 298.150 Kelvin. Pressure 1.00000 Atm.  
Zero-point correction= 0.117173  
(Hartree/Particle)  
Thermal correction to Energy= 0.122138  
Thermal correction to Enthalpy= 0.123083  
Thermal correction to Gibbs Free Energy= 0.087703  
Sum of electronic and zero-point Energies= -232.349231  
Sum of electronic and thermal Energies= -232.344266  
Sum of electronic and thermal Enthalpies= -232.343321  
Sum of electronic and thermal Free Energies= -232.378701  
PCM-SP (solvent=THF;6-311+g(2d,p)) = -232.534621381  
Corrected Free Energy = -232.446918440

-----  
SUBSTRATE: N-PICOLINOYL-AZIRIDINE

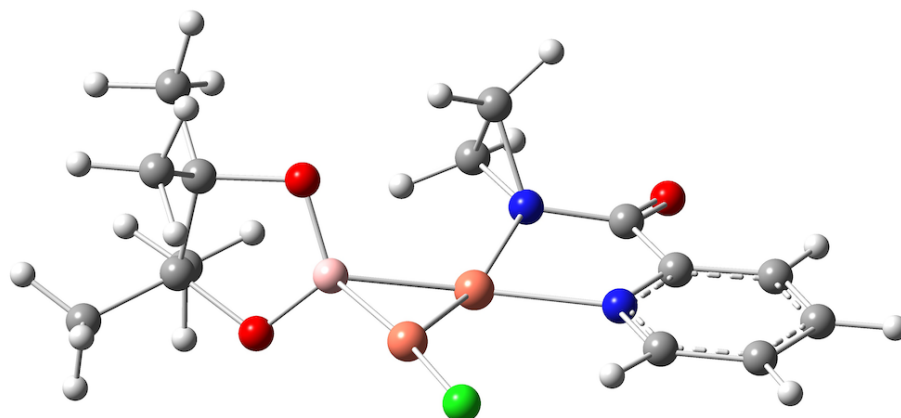

Complex-2 Substrate: N-(2-picolinoyl)-aziridine

#### CARTESIAN COORDINATES

|   |           |           |          |
|---|-----------|-----------|----------|
| C | -0.542709 | -2.662926 | 1.258566 |
|---|-----------|-----------|----------|

|    |           |           |           |
|----|-----------|-----------|-----------|
| N  | -1.155239 | -2.128528 | -0.015373 |
| C  | -2.575430 | -2.280262 | -0.141559 |
| O  | -3.130360 | -3.349775 | -0.304831 |
| C  | -0.349094 | -3.362143 | -0.030492 |
| C  | -3.321888 | -0.980578 | -0.080847 |
| C  | -4.713650 | -0.970393 | 0.008373  |
| C  | -5.362897 | 0.265170  | 0.073534  |
| C  | -4.600361 | 1.433490  | 0.047512  |
| C  | -3.207985 | 1.337602  | -0.050543 |
| N  | -2.587351 | 0.150731  | -0.118283 |
| Cu | 0.332869  | 2.014387  | -0.026419 |
| H  | -5.253469 | -1.911019 | 0.027108  |
| H  | -6.445753 | 0.312126  | 0.145970  |
| H  | -2.563608 | 2.214700  | -0.071679 |
| H  | -5.064816 | 2.413153  | 0.099423  |
| H  | -0.897284 | -4.283501 | -0.206653 |
| H  | 0.592498  | -3.246119 | -0.557266 |
| H  | -1.247745 | -3.091259 | 1.967234  |
| Cu | -0.542970 | -0.090629 | -0.279139 |
| B  | 1.482328  | 0.229692  | -0.143114 |
| O  | 2.030928  | -0.410763 | 0.973650  |
| O  | 2.413466  | 0.296315  | -1.169298 |
| C  | 3.472608  | -0.511966 | 0.777380  |
| C  | 3.597613  | -0.459105 | -0.787202 |
| Cl | -0.489750 | 3.994594  | 0.216554  |
| H  | 0.242055  | -2.027072 | 1.659324  |
| C  | 4.094086  | 0.703814  | 1.477615  |
| H  | 3.794457  | 0.697460  | 2.530408  |
| H  | 5.188332  | 0.682867  | 1.425846  |
| H  | 3.737165  | 1.638169  | 1.033345  |
| C  | 4.832163  | 0.269557  | -1.312034 |
| H  | 5.748881  | -0.225236 | -0.968435 |
| H  | 4.826900  | 0.260972  | -2.406991 |
| H  | 4.850897  | 1.311521  | -0.985191 |
| C  | 3.966212  | -1.803367 | 1.423900  |
| H  | 5.034360  | -1.951822 | 1.224752  |
| H  | 3.826246  | -1.749257 | 2.508856  |
| H  | 3.419678  | -2.675431 | 1.055369  |
| C  | 3.475748  | -1.835066 | -1.455612 |
| H  | 3.361727  | -1.696040 | -2.535219 |
| H  | 4.361610  | -2.453682 | -1.273513 |
| H  | 2.594265  | -2.370681 | -1.089471 |

Electronic Energy = -1760.73090756 (Hartree/Particle)

Dipole Moment (Debye): 8.8294

index 0

Harmonic frequencies

Number of imaginary frequencies= 0

#### THERMOCHEMICAL DATA

Temperature 298.150 Kelvin. Pressure 1.00000 Atm.

Zero-point correction= 0.335852

(Hartree/Particle)

Thermal correction to Energy= 0.361316

Thermal correction to Enthalpy= 0.362260

Thermal correction to Gibbs Free Energy= 0.277426

Sum of electronic and zero-point Energies= -1760.395055

Sum of electronic and thermal Energies= -1760.369592

Sum of electronic and thermal Enthalpies= -1760.368648

Sum of electronic and thermal Free Energies= -1760.453482  
 PCM-SP (solvent=THF;6-311+g(2d,p)) = -1761.03892194  
 Corrected Free Energy = -1760.76149638

---

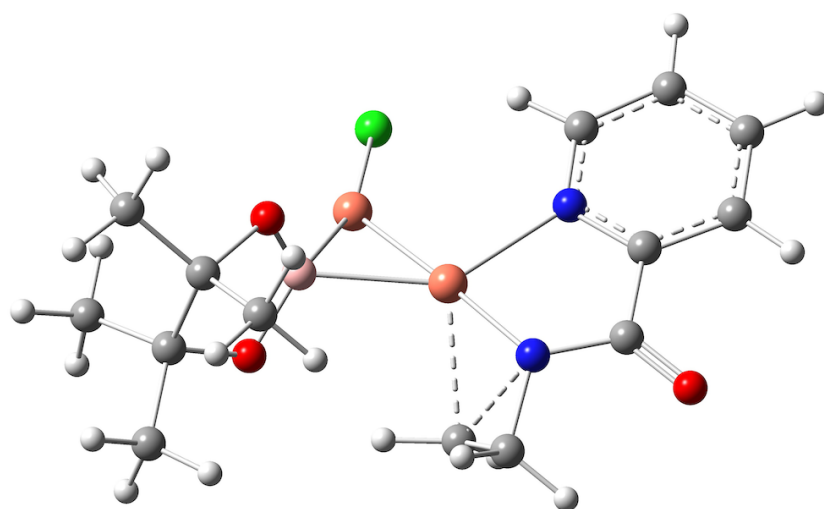

TS3      Substrate: N-(2-picolinoyl)-aziridine

# CARTESIAN COORDINATES

|    |           |           |           |
|----|-----------|-----------|-----------|
| C  | 0.158449  | -1.875530 | -1.799364 |
| N  | 1.177813  | -2.151507 | -0.192739 |
| C  | 2.575439  | -2.219641 | -0.165330 |
| O  | 3.210548  | -3.226336 | -0.456653 |
| C  | 0.486481  | -3.108989 | -1.039983 |
| C  | 3.251533  | -0.963670 | 0.316683  |
| C  | 4.618944  | -0.944954 | 0.582719  |
| C  | 5.196648  | 0.263138  | 0.983094  |
| C  | 4.394646  | 1.401031  | 1.078492  |
| C  | 3.032573  | 1.298848  | 0.777161  |
| N  | 2.478500  | 0.133325  | 0.419603  |
| Cu | -0.232301 | 1.879015  | -0.435811 |
| H  | 5.195621  | -1.855789 | 0.462987  |
| H  | 6.258819  | 0.315522  | 1.205347  |
| H  | 2.369342  | 2.159556  | 0.793564  |
| H  | 4.806890  | 2.361023  | 1.372606  |
| H  | 1.140416  | -3.838518 | -1.520667 |
| H  | -0.355437 | -3.583639 | -0.533154 |
| H  | 0.865850  | -1.550291 | -2.556450 |
| Cu | 0.489332  | -0.325566 | -0.164282 |
| B  | -1.537726 | 0.365377  | 0.000118  |
| O  | -2.441902 | -0.108101 | -0.946355 |
| O  | -2.058080 | 0.258686  | 1.279466  |
| C  | -3.726169 | -0.314924 | -0.282235 |
| C  | -3.287616 | -0.523107 | 1.209731  |
| Cl | 0.708874  | 3.794117  | -0.712525 |
| H  | -0.850785 | -1.473877 | -1.837696 |
| C  | -4.266972 | 0.007119  | 2.251963  |
| H  | -5.234585 | -0.501994 | 2.165358  |
| H  | -3.871715 | -0.175707 | 3.256556  |
| H  | -4.424391 | 1.082460  | 2.142961  |
| C  | -2.897082 | -1.972135 | 1.531387  |
| H  | -2.409302 | -1.998504 | 2.510720  |

|   |           |           |           |
|---|-----------|-----------|-----------|
| H | -3.772108 | -2.630715 | 1.557991  |
| H | -2.186966 | -2.359593 | 0.792893  |
| C | -4.546394 | 0.961964  | -0.502516 |
| H | -4.633373 | 1.146457  | -1.577875 |
| H | -5.553660 | 0.868552  | -0.081905 |
| H | -4.054565 | 1.828869  | -0.050469 |
| C | -4.420516 | -1.511245 | -0.925846 |
| H | -5.348122 | -1.750712 | -0.392315 |
| H | -4.675023 | -1.275935 | -1.964612 |
| H | -3.781577 | -2.398236 | -0.926259 |

Electronic Energy = -1760.69923010 (Hartree/Particle)

Dipole Moment (Debye): 6.6275

index 0

Harmonic frequencies

Number of imaginary frequencies= 1

Negatives Eigenvalues: -250.419

#### THERMOCHEMICAL DATA

Temperature 298.150 Kelvin. Pressure 1.00000 Atm.

Zero-point correction= 0.334219

(Hartree/Particle)

Thermal correction to Energy= 0.359120

Thermal correction to Enthalpy= 0.360064

Thermal correction to Gibbs Free Energy= 0.277475

Sum of electronic and zero-point Energies= -1760.365011

Sum of electronic and thermal Energies= -1760.340110

Sum of electronic and thermal Enthalpies= -1760.339166

Sum of electronic and thermal Free Energies= -1760.421755

PCM-SP (solvent=THF;6-311+g(2d,p)) = -1761.00756245

Corrected Free Energy = -1760.73008735

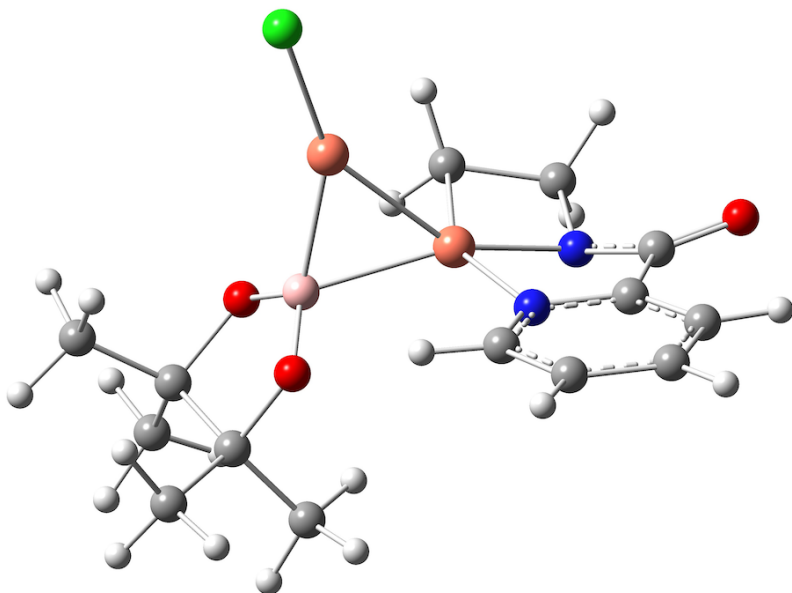

I2 Substrate: N-(2-picolinoyl)-aziridine

#### CARTESIAN COORDINATES

|   |          |           |           |
|---|----------|-----------|-----------|
| C | 0.543509 | 1.455816  | -2.310895 |
| N | 2.104637 | -0.048611 | -1.870806 |

|    |           |           |           |
|----|-----------|-----------|-----------|
| C  | 3.287260  | -0.323275 | -1.266037 |
| O  | 4.417673  | -0.139136 | -1.715004 |
| C  | 1.864794  | 0.955508  | -2.902785 |
| C  | 3.055005  | -0.938667 | 0.108640  |
| C  | 4.074158  | -1.539606 | 0.839542  |
| C  | 3.775369  | -2.044123 | 2.107926  |
| C  | 2.474954  | -1.924015 | 2.605367  |
| C  | 1.508043  | -1.294462 | 1.820276  |
| N  | 1.802992  | -0.820415 | 0.602439  |
| Cu | -0.458564 | 1.784597  | 0.688350  |
| H  | 5.068024  | -1.587504 | 0.406843  |
| H  | 4.548755  | -2.520715 | 2.703950  |
| H  | 0.479943  | -1.162525 | 2.140318  |
| H  | 2.208916  | -2.301270 | 3.587548  |
| H  | 2.652474  | 1.717742  | -2.932501 |
| H  | 1.765370  | 0.513248  | -3.901323 |
| H  | 0.521328  | 2.477400  | -1.931132 |
| Cu | 0.699510  | 0.280272  | -0.699454 |
| B  | -1.352322 | 0.114069  | -0.054363 |
| O  | -2.340004 | 0.250280  | -1.001195 |
| O  | -1.554022 | -0.974534 | 0.770287  |
| C  | -3.429572 | -0.657036 | -0.628467 |
| C  | -2.672002 | -1.745028 | 0.214403  |
| Cl | -0.467064 | 3.492789  | 1.951594  |
| H  | -0.385623 | 1.152621  | -2.792270 |
| C  | -3.471396 | -2.341264 | 1.367137  |
| H  | -4.369158 | -2.844911 | 0.989530  |
| H  | -2.862571 | -3.081605 | 1.896689  |
| H  | -3.774293 | -1.575285 | 2.084423  |
| C  | -2.043988 | -2.851813 | -0.640328 |
| H  | -1.369330 | -3.444885 | -0.014724 |
| H  | -2.807126 | -3.518226 | -1.056270 |
| H  | -1.458743 | -2.430806 | -1.464494 |
| C  | -4.422248 | 0.169898  | 0.196150  |
| H  | -4.751044 | 1.026453  | -0.400151 |
| H  | -5.302051 | -0.422024 | 0.470564  |
| H  | -3.956674 | 0.554897  | 1.108865  |
| C  | -4.086587 | -1.172658 | -1.903955 |
| H  | -4.847731 | -1.924876 | -1.664828 |
| H  | -4.576554 | -0.344794 | -2.426400 |
| H  | -3.355987 | -1.617257 | -2.583879 |

Electronic Energy = -1760.71306275 (Hartree/Particle)

Dipole Moment (Debye): 8.7512

index 0

Harmonic frequencies

Number of imaginary frequencies= 0

#### THERMOCHEMICAL DATA

Temperature 298.150 Kelvin. Pressure 1.00000 Atm.

Zero-point correction= 0.335220

(Hartree/Particle)

Thermal correction to Energy= 0.360420

Thermal correction to Enthalpy= 0.361364

Thermal correction to Gibbs Free Energy= 0.277322

Sum of electronic and zero-point Energies= -1760.377842

Sum of electronic and thermal Energies= -1760.352643

Sum of electronic and thermal Enthalpies= -1760.351698

Sum of electronic and thermal Free Energies= -1760.435740

PCM-SP (solvent=THF;6-311+g(2d,p)) = -1761.02236686  
Corrected Free Energy = -1760.74504404

---

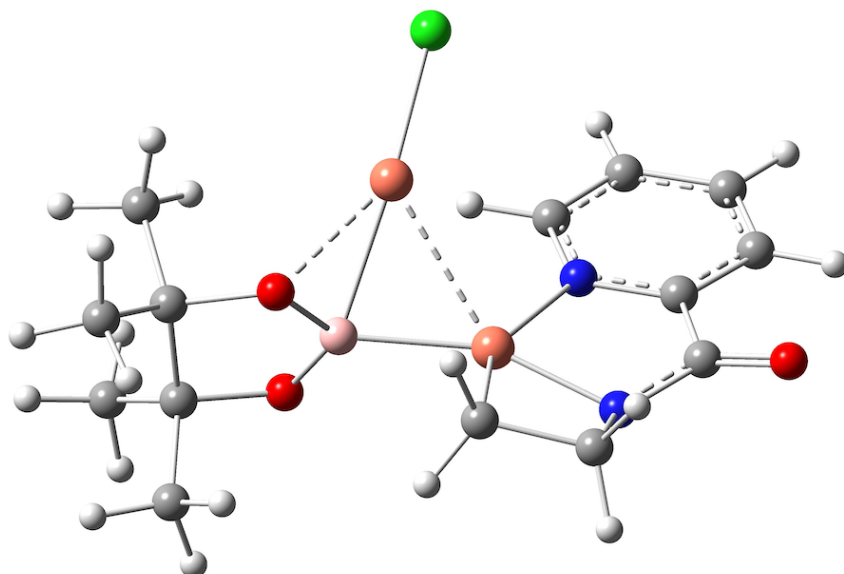

TS4      Substrate: N-(2-picolinoyl)-aziridine

CARTESIAN COORDINATES

|    |           |           |           |
|----|-----------|-----------|-----------|
| N  | -2.100287 | 0.290725  | 0.754959  |
| C  | -3.304581 | -0.267376 | 0.488042  |
| C  | -4.494711 | 0.384427  | 0.789447  |
| C  | -4.436181 | 1.638037  | 1.403426  |
| C  | -3.190828 | 2.205166  | 1.678578  |
| C  | -2.039532 | 1.502252  | 1.325043  |
| C  | -3.276817 | -1.615858 | -0.222265 |
| O  | -4.277090 | -2.082718 | -0.770962 |
| Cu | -0.629187 | -0.936290 | 0.034329  |
| N  | -2.041223 | -2.150160 | -0.140512 |
| C  | -1.435672 | -3.119524 | -1.044920 |
| C  | -0.022934 | -2.511278 | -1.036204 |
| B  | 1.314173  | -0.396091 | 0.194877  |
| Cu | 0.421379  | 1.168822  | -0.997942 |
| Cl | -0.444760 | 3.077071  | -1.372780 |
| O  | 2.222218  | -0.164770 | -0.837061 |
| C  | 3.520002  | 0.175727  | -0.208055 |
| C  | 4.628738  | -0.365023 | -1.101572 |
| O  | 1.924814  | -0.492018 | 1.414822  |
| C  | 3.377565  | -0.528203 | 1.187689  |
| C  | 3.776938  | -2.007380 | 1.168451  |
| C  | 3.580121  | 1.702623  | -0.127722 |
| C  | 4.058843  | 0.198857  | 2.341183  |
| H  | -5.429809 | -0.098000 | 0.524619  |
| H  | -5.349944 | 2.170829  | 1.651955  |
| H  | -1.047815 | 1.915593  | 1.465416  |
| H  | -3.100928 | 3.185473  | 2.134624  |
| H  | -1.473886 | -4.144496 | -0.653981 |
| H  | 0.736604  | -3.061981 | -0.479514 |
| H  | 0.357459  | -2.120650 | -1.980098 |
| H  | 4.542088  | 2.040202  | 0.271445  |
| H  | 3.452028  | 2.119648  | -1.131238 |
| H  | 2.777559  | 2.101949  | 0.500639  |

|   |           |           |           |
|---|-----------|-----------|-----------|
| H | 4.633481  | 0.176872  | -2.052530 |
| H | 5.604508  | -0.223509 | -0.622083 |
| H | 4.494832  | -1.427528 | -1.316479 |
| H | 3.899168  | -0.355742 | 3.271266  |
| H | 5.138647  | 0.269122  | 2.164137  |
| H | 3.658680  | 1.206303  | 2.474533  |
| H | 4.860638  | -2.126730 | 1.064208  |
| H | 3.464644  | -2.471159 | 2.109120  |
| H | 3.287200  | -2.540970 | 0.347218  |
| H | -1.903336 | -3.110968 | -2.037872 |

Electronic Energy = -1760.70515508 (Hartree/Particle)

Dipole Moment (Debye): 7.3206

index 0

Harmonic frequencies

Number of imaginary frequencies= 1

Negatives Eigenvalues: -78.759

#### THERMOCHEMICAL DATA

Temperature 298.150 Kelvin. Pressure 1.00000 Atm.

Zero-point correction= 0.334875

(Hartree/Particle)

Thermal correction to Energy= 0.359345

Thermal correction to Enthalpy= 0.360290

Thermal correction to Gibbs Free Energy= 0.278794

Sum of electronic and zero-point Energies= -1760.370280

Sum of electronic and thermal Energies= -1760.345810

Sum of electronic and thermal Enthalpies= -1760.344866

Sum of electronic and thermal Free Energies= -1760.426361

PCM-SP (solvent=THF;6-311+g(2d,p)) = -1761.01401254

Corrected Free Energy = -1760.73521846

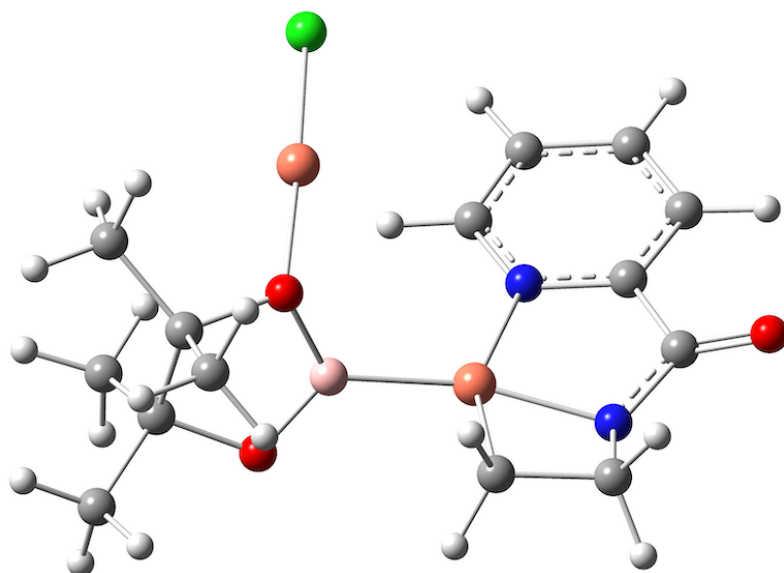

I3 Substrate: N-(2-picolinoyl)-aziridine

#### CARTESIAN COORDINATES

|    |           |           |           |
|----|-----------|-----------|-----------|
| C  | -1.891963 | -3.351253 | -0.697271 |
| Cu | -0.856482 | -1.243462 | 0.283068  |

|    |           |           |           |
|----|-----------|-----------|-----------|
| B  | 1.064280  | -0.843109 | 0.325983  |
| O  | 1.734952  | -0.056576 | -0.652584 |
| C  | 3.198178  | -0.351491 | -0.529570 |
| C  | 3.283065  | -0.759259 | 0.975253  |
| O  | 1.966229  | -1.361454 | 1.207323  |
| Cu | 1.013390  | 1.742606  | -0.713238 |
| Cl | 0.276893  | 3.709918  | -0.604308 |
| C  | -0.399450 | -2.999230 | -0.521252 |
| N  | -2.447133 | -2.199304 | 0.008223  |
| C  | -3.500874 | -1.453234 | -0.370113 |
| C  | -3.361709 | -0.043993 | 0.203375  |
| C  | -4.422494 | 0.853988  | 0.221136  |
| C  | -4.206817 | 2.143880  | 0.714117  |
| C  | -2.933727 | 2.498173  | 1.161417  |
| C  | -1.913870 | 1.549129  | 1.099766  |
| N  | -2.124105 | 0.309219  | 0.634976  |
| O  | -4.462426 | -1.765434 | -1.079059 |
| H  | -5.381479 | 0.525345  | -0.165739 |
| H  | -5.018118 | 2.866393  | 0.735811  |
| H  | -0.900542 | 1.790849  | 1.397389  |
| H  | -2.710504 | 3.495717  | 1.523793  |
| H  | -2.166952 | -4.305404 | -0.228580 |
| H  | 0.151638  | -3.591230 | 0.211044  |
| H  | 0.169613  | -2.856325 | -1.441823 |
| C  | 3.997043  | 0.880633  | -0.926124 |
| H  | 5.067407  | 0.684590  | -0.794243 |
| H  | 3.820360  | 1.118251  | -1.979937 |
| H  | 3.732456  | 1.758574  | -0.331652 |
| C  | 3.455589  | -1.505105 | -1.500178 |
| H  | 3.155314  | -1.200181 | -2.507242 |
| H  | 4.517980  | -1.768354 | -1.519507 |
| H  | 2.881692  | -2.395321 | -1.224818 |
| C  | 3.395236  | 0.441301  | 1.920811  |
| H  | 3.223255  | 0.100324  | 2.946019  |
| H  | 4.388503  | 0.899302  | 1.868155  |
| H  | 2.646518  | 1.205985  | 1.685682  |
| C  | 4.349143  | -1.802222 | 1.289799  |
| H  | 5.344859  | -1.422544 | 1.032008  |
| H  | 4.335589  | -2.028547 | 2.360462  |
| H  | 4.174620  | -2.733072 | 0.745231  |
| H  | -2.206601 | -3.382176 | -1.748629 |

Electronic Energy = -1760.71525541 (Hartree/Particle)

Dipole Moment (Debye): 7.2813

index 0

Harmonic frequencies

Number of imaginary frequencies= 0

#### THERMOCHEMICAL DATA

Temperature 298.150 Kelvin. Pressure 1.00000 Atm.

Zero-point correction= 0.335833

(Hartree/Particle)

Thermal correction to Energy= 0.360675

Thermal correction to Enthalpy= 0.361619

Thermal correction to Gibbs Free Energy= 0.278963

Sum of electronic and zero-point Energies= -1760.379422

Sum of electronic and thermal Energies= -1760.354581

Sum of electronic and thermal Enthalpies= -1760.353637

Sum of electronic and thermal Free Energies= -1760.436292

PCM-SP (solvent=THF;6-311+g(2d,p)) = -1761.02421944  
 Corrected Free Energy = -1760.74525603

-----  
 TS5        Substrate: N-(2-picolinoyl)-aziridine

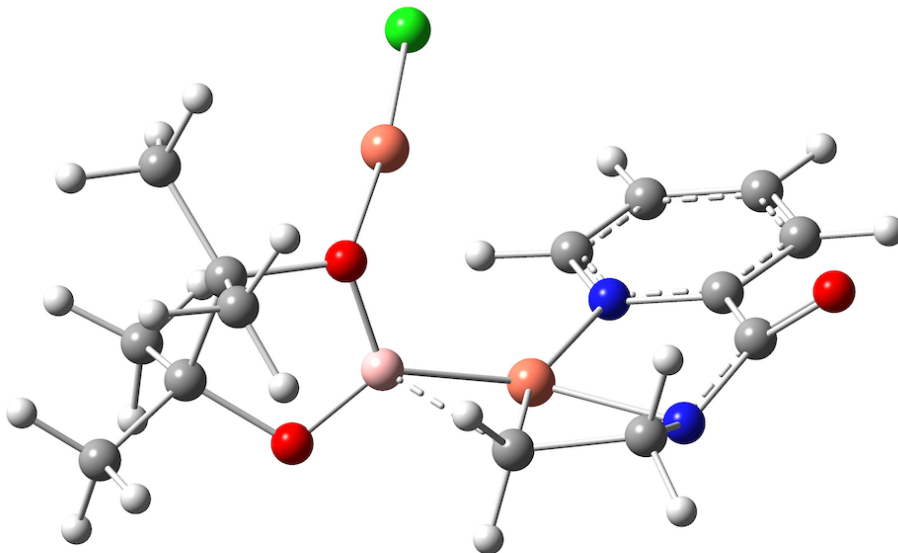

#### CARTESIAN COORDINATES

|    |           |           |           |
|----|-----------|-----------|-----------|
| C  | -0.970595 | -3.159042 | -0.728286 |
| Cu | -0.681748 | -1.094072 | 0.591138  |
| B  | 1.247819  | -0.880856 | 0.331049  |
| O  | 1.731145  | -0.084541 | -0.744432 |
| C  | 3.220107  | -0.012842 | -0.592490 |
| C  | 3.369381  | -0.225359 | 0.951699  |
| O  | 2.229658  | -1.091504 | 1.259199  |
| Cu | 0.603790  | 1.513936  | -0.784849 |
| Cl | -0.440746 | 3.337481  | -0.689218 |
| C  | 0.373003  | -2.650978 | -0.104653 |
| N  | -1.983416 | -2.411904 | 0.019840  |
| C  | -2.984521 | -1.767115 | -0.600969 |
| C  | -3.288180 | -0.441246 | 0.109069  |
| C  | -4.524490 | 0.190349  | 0.017202  |
| C  | -4.695337 | 1.438409  | 0.618727  |
| C  | -3.613286 | 2.038029  | 1.266442  |
| C  | -2.392608 | 1.368249  | 1.290509  |
| N  | -2.238881 | 0.153872  | 0.739020  |
| O  | -3.584613 | -2.043437 | -1.649469 |
| H  | -5.315525 | -0.304580 | -0.536113 |
| H  | -5.655031 | 1.945794  | 0.568359  |
| H  | -1.505967 | 1.814823  | 1.723787  |
| H  | -3.693628 | 3.021300  | 1.717733  |
| H  | -1.041709 | -4.249836 | -0.605718 |
| H  | 0.662475  | -3.232283 | 0.774952  |
| H  | 1.189914  | -2.667179 | -0.832395 |
| C  | 3.713414  | 1.324088  | -1.123895 |
| H  | 4.796081  | 1.403220  | -0.973006 |
| H  | 3.510617  | 1.397876  | -2.196892 |
| H  | 3.234327  | 2.172490  | -0.628940 |

|   |           |           |           |
|---|-----------|-----------|-----------|
| C | 3.769704  | -1.166850 | -1.431538 |
| H | 3.419361  | -1.060411 | -2.462640 |
| H | 4.864241  | -1.155726 | -1.434294 |
| H | 3.440566  | -2.138777 | -1.052056 |
| C | 3.187389  | 1.062068  | 1.762946  |
| H | 3.094154  | 0.800850  | 2.821233  |
| H | 4.045500  | 1.731456  | 1.643721  |
| H | 2.281856  | 1.602194  | 1.465599  |
| C | 4.645576  | -0.949275 | 1.366891  |
| H | 5.527717  | -0.374925 | 1.060865  |
| H | 4.667787  | -1.056268 | 2.455749  |
| H | 4.704801  | -1.947777 | 0.927861  |
| H | -1.023925 | -2.940027 | -1.803051 |

Electronic Energy = -1760.70833509 (Hartree/Particle)  
Dipole Moment (Debye): 8.2841  
index 0  
Harmonic frequencies  
Number of imaginary frequencies= 1  
Negatives Eigenvalues: -142.730

#### THERMOCHEMICAL DATA

Temperature 298.150 Kelvin. Pressure 1.00000 Atm.  
Zero-point correction= 0.335397  
(Hartree/Particle)  
Thermal correction to Energy= 0.359422  
Thermal correction to Enthalpy= 0.360366  
Thermal correction to Gibbs Free Energy= 0.280878  
Sum of electronic and zero-point Energies= -1760.372938  
Sum of electronic and thermal Energies= -1760.348914  
Sum of electronic and thermal Enthalpies= -1760.347969  
Sum of electronic and thermal Free Energies= -1760.427457  
PCM-SP (solvent=THF;6-311+g(2d,p)) = -1761.02086132  
Corrected Free Energy = -1760.73998323

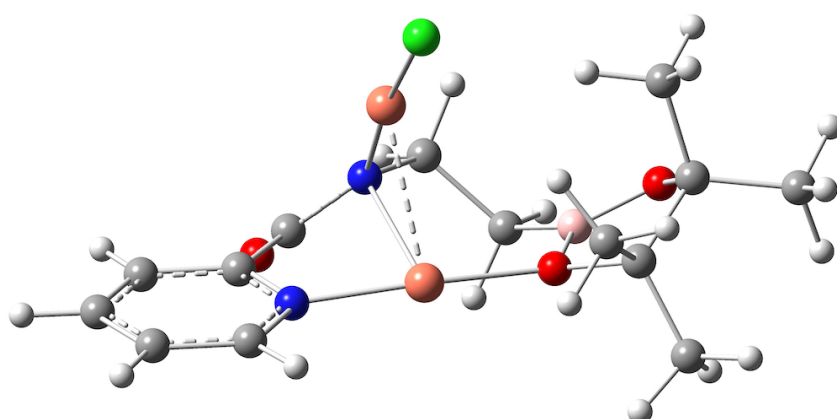

P2 Substrate: N-(2-picolinoyl)-aziridine

#### CARTESIAN COORDINATES

|    |           |           |           |
|----|-----------|-----------|-----------|
| C  | -0.070191 | -2.352295 | -1.352086 |
| Cu | -0.378070 | 0.106828  | 0.976671  |
| B  | 1.890236  | -1.540129 | 0.161698  |
| O  | 3.181716  | -1.408897 | -0.240285 |
| C  | 3.635354  | -0.041736 | 0.027538  |

|    |           |           |           |
|----|-----------|-----------|-----------|
| C  | 2.692794  | 0.413978  | 1.198690  |
| O  | 1.498603  | -0.436267 | 0.947713  |
| Cu | -0.535985 | 0.493520  | -1.572702 |
| Cl | 0.084588  | 2.462996  | -2.067859 |
| C  | 0.925930  | -2.718295 | -0.212518 |
| N  | -0.968834 | -1.258650 | -0.947311 |
| C  | -2.159055 | -1.637799 | -0.424154 |
| C  | -2.959638 | -0.528077 | 0.243425  |
| C  | -4.347951 | -0.481046 | 0.114322  |
| C  | -5.057745 | 0.527274  | 0.762329  |
| C  | -4.363095 | 1.446728  | 1.554880  |
| C  | -2.983664 | 1.317673  | 1.671667  |
| N  | -2.294312 | 0.355063  | 1.028223  |
| O  | -2.640013 | -2.780931 | -0.381210 |
| H  | -4.836087 | -1.237015 | -0.490762 |
| H  | -6.136760 | 0.596306  | 0.655771  |
| H  | -2.396570 | 1.991029  | 2.286716  |
| H  | -4.876732 | 2.245716  | 2.079734  |
| H  | -0.659066 | -3.237519 | -1.612411 |
| H  | 0.331563  | -3.032394 | 0.656206  |
| H  | 1.521664  | -3.582869 | -0.533113 |
| C  | 3.420477  | 0.749261  | -1.265265 |
| H  | 3.798339  | 1.772599  | -1.173540 |
| H  | 3.960994  | 0.250191  | -2.075483 |
| H  | 2.363310  | 0.807732  | -1.541051 |
| C  | 5.114693  | -0.090214 | 0.394635  |
| H  | 5.693346  | -0.419716 | -0.473790 |
| H  | 5.469188  | 0.906015  | 0.683342  |
| H  | 5.308743  | -0.785597 | 1.214794  |
| C  | 2.258040  | 1.872066  | 1.150333  |
| H  | 1.598425  | 2.087957  | 1.999313  |
| H  | 3.131803  | 2.528754  | 1.228064  |
| H  | 1.720170  | 2.108411  | 0.228460  |
| C  | 3.187024  | 0.022985  | 2.591185  |
| H  | 4.048826  | 0.630659  | 2.884991  |
| H  | 2.383656  | 0.189974  | 3.316082  |
| H  | 3.471822  | -1.032984 | 2.633024  |
| H  | 0.483532  | -2.036776 | -2.242350 |

Electronic Energy = -1760.81585981 (Hartree/Particle)

Dipole Moment (Debye): 6.7494

index 0

Harmonic frequencies

Number of imaginary frequencies= 0

#### THERMOCHEMICAL DATA

Temperature 298.150 Kelvin. Pressure 1.00000 Atm.

Zero-point correction= 0.338359

(Hartree/Particle)

Thermal correction to Energy= 0.362615

Thermal correction to Enthalpy= 0.363559

Thermal correction to Gibbs Free Energy= 0.284403

Sum of electronic and zero-point Energies= -1760.477501

Sum of electronic and thermal Energies= -1760.453245

Sum of electronic and thermal Enthalpies= -1760.452300

Sum of electronic and thermal Free Energies= -1760.531457

PCM-SP (solvent=THF;6-311+g(2d,p)) = -1761.12387972

Corrected Free Energy = -1760.83947691

-----  
 SUBSTITUTION OF CHLORIDE WITH ALKOXIDE ANION (REF 30, MAIN TEXT, TABLE S1)

Complex-2 (Ref 33)      Substrate:    N-(2picolinoyl)-aziridine  
                                  Alkoxide =    Methoxide

CARTESIAN COORDINATES

|    |           |           |           |
|----|-----------|-----------|-----------|
| C  | -0.464538 | -2.792596 | 1.058214  |
| N  | -1.116269 | -2.175923 | -0.157270 |
| C  | -2.543619 | -2.319220 | -0.242166 |
| O  | -3.100970 | -3.377926 | -0.459882 |
| C  | -0.314904 | -3.406339 | -0.280158 |
| C  | -3.286800 | -1.030181 | -0.056949 |
| C  | -4.672964 | -1.030943 | 0.098084  |
| C  | -5.314324 | 0.196614  | 0.284344  |
| C  | -4.550389 | 1.364076  | 0.309722  |
| C  | -3.162554 | 1.283824  | 0.138230  |
| N  | -2.553861 | 0.101696  | -0.047749 |
| Cu | 0.241600  | 1.978102  | 0.022459  |
| H  | -5.213830 | -1.970914 | 0.074152  |
| H  | -6.392614 | 0.237162  | 0.411147  |
| H  | -2.510978 | 2.164106  | 0.150794  |
| H  | -5.012156 | 2.335394  | 0.458040  |
| H  | -0.871682 | -4.313852 | -0.496958 |
| H  | 0.608539  | -3.257898 | -0.830603 |
| H  | -1.147921 | -3.267452 | 1.758528  |
| Cu | -0.500919 | -0.149243 | -0.313134 |
| B  | 1.516709  | 0.314551  | -0.096922 |
| O  | 2.035613  | -0.386974 | 1.002319  |
| O  | 2.486252  | 0.430162  | -1.087831 |
| C  | 3.479001  | -0.490521 | 0.841162  |
| C  | 3.647278  | -0.360006 | -0.714065 |
| H  | 0.331677  | -2.183407 | 1.477890  |
| C  | 4.093146  | 0.682082  | 1.618098  |
| H  | 3.764199  | 0.626540  | 2.660738  |
| H  | 5.188363  | 0.652361  | 1.595165  |
| H  | 3.756441  | 1.640454  | 1.210791  |
| C  | 4.907617  | 0.372339  | -1.168292 |
| H  | 5.806951  | -0.154120 | -0.825449 |
| H  | 4.932729  | 0.418421  | -2.262158 |
| H  | 4.933541  | 1.396327  | -0.789028 |
| C  | 3.946014  | -1.817318 | 1.434517  |
| H  | 5.018142  | -1.965371 | 1.256949  |
| H  | 3.776575  | -1.817263 | 2.516724  |
| H  | 3.403117  | -2.664631 | 1.007352  |
| C  | 3.524134  | -1.699977 | -1.453184 |
| H  | 3.439406  | -1.505537 | -2.526992 |
| H  | 4.395918  | -2.341158 | -1.280588 |
| H  | 2.625145  | -2.237939 | -1.136011 |
| O  | -0.816721 | 3.459516  | 0.309901  |
| C  | -0.652954 | 4.699784  | -0.318707 |
| H  | -1.501627 | 5.365669  | -0.073895 |
| H  | 0.266820  | 5.221530  | 0.005907  |
| H  | -0.607396 | 4.623563  | -1.422336 |

Electronic Energy = -1415.60696054 (Hartree/Particle)

Dipole Moment (Debye):      6.3125

index 0  
 Harmonic frequencies  
 Number of imaginary frequencies= 0

# THERMOCHEMICAL DATA

Temperature 298.150 Kelvin. Pressure 1.00000 Atm.  
 Zero-point correction= 0.375106  
 (Hartree/Particle)  
 Thermal correction to Energy= 0.402580  
 Thermal correction to Enthalpy= 0.403525  
 Thermal correction to Gibbs Free Energy= 0.314215  
 Sum of electronic and zero-point Energies= -1415.231855  
 Sum of electronic and thermal Energies= -1415.204380  
 Sum of electronic and thermal Enthalpies= -1415.203436  
 Sum of electronic and thermal Free Energies= -1415.292746  
 PCM-SP (solvent=THF;6-311+g(2d,p)) = -1415.91385033  
 Corrected Free Energy = -1415.59963579

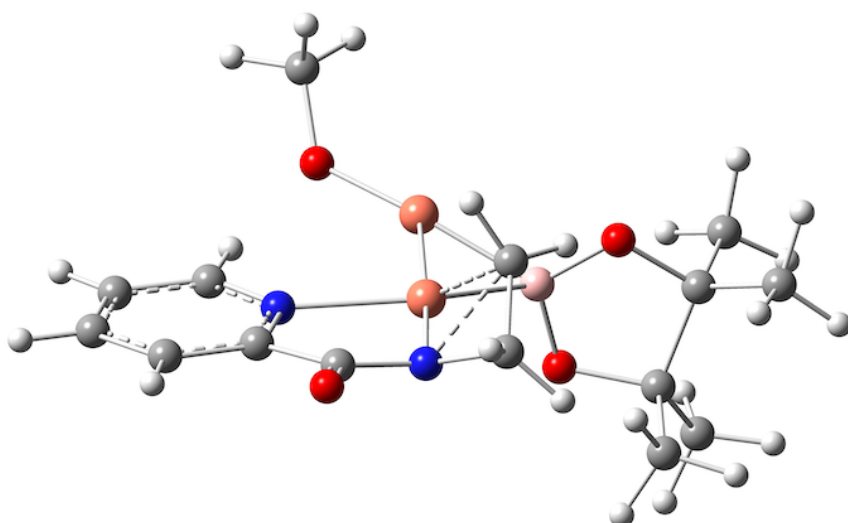

TS3 (Ref 33) Substrate: N-(2picolinoyl)-aziridine  
 Alkoxide = Methoxide

# CARTESIAN COORDINATES

|    |           |           |           |
|----|-----------|-----------|-----------|
| C  | 0.076705  | -1.911054 | -1.736694 |
| N  | 1.109200  | -2.186978 | -0.153108 |
| C  | 2.506041  | -2.298574 | -0.147079 |
| O  | 3.098689  | -3.337804 | -0.413726 |
| C  | 0.375026  | -3.143560 | -0.963419 |
| C  | 3.235525  | -1.050953 | 0.273543  |
| C  | 4.608110  | -1.073735 | 0.512445  |
| C  | 5.236698  | 0.128148  | 0.850143  |
| C  | 4.478970  | 1.298481  | 0.906794  |
| C  | 3.106914  | 1.241154  | 0.633579  |
| N  | 2.506033  | 0.077408  | 0.343464  |
| Cu | -0.166547 | 1.881830  | -0.196704 |
| H  | 5.148759  | -2.009674 | 0.421572  |
| H  | 6.303885  | 0.149621  | 1.053602  |
| H  | 2.470776  | 2.129079  | 0.609462  |
| H  | 4.933854  | 2.252998  | 1.153017  |

|    |           |           |           |
|----|-----------|-----------|-----------|
| H  | 0.998713  | -3.900983 | -1.440844 |
| H  | -0.470773 | -3.582894 | -0.432283 |
| H  | 0.778115  | -1.627448 | -2.515509 |
| Cu | 0.467511  | -0.347000 | -0.129975 |
| B  | -1.565016 | 0.440770  | 0.043228  |
| O  | -2.441865 | 0.046484  | -0.969632 |
| O  | -2.140077 | 0.233980  | 1.290602  |
| C  | -3.749317 | -0.197782 | -0.372437 |
| C  | -3.370682 | -0.523362 | 1.114738  |
| H  | -0.916310 | -1.468631 | -1.760724 |
| C  | -4.386078 | -0.063796 | 2.156735  |
| H  | -5.354514 | -0.552554 | 1.993967  |
| H  | -4.032047 | -0.328410 | 3.158564  |
| H  | -4.528700 | 1.018710  | 2.126082  |
| C  | -3.009467 | -1.998362 | 1.339643  |
| H  | -2.557105 | -2.104913 | 2.330488  |
| H  | -3.891689 | -2.645724 | 1.284993  |
| H  | -2.277447 | -2.337833 | 0.599406  |
| C  | -4.554489 | 1.099177  | -0.523542 |
| H  | -4.600424 | 1.366016  | -1.584208 |
| H  | -5.577351 | 0.983188  | -0.148315 |
| H  | -4.073891 | 1.924003  | 0.011718  |
| C  | -4.428468 | -1.334266 | -1.131451 |
| H  | -5.378012 | -1.604333 | -0.653847 |
| H  | -4.640222 | -1.018087 | -2.158388 |
| H  | -3.796954 | -2.225592 | -1.175690 |
| O  | 0.882489  | 3.378967  | -0.108019 |
| C  | 1.018278  | 4.351025  | -1.106879 |
| H  | 0.079342  | 4.905180  | -1.289085 |
| H  | 1.778963  | 5.096030  | -0.810885 |
| H  | 1.337048  | 3.927046  | -2.078549 |

Electronic Energy = -1415.57769795 (Hartree/Particle)

Dipole Moment (Debye): 4.3192

index 0

Harmonic frequencies

Number of imaginary frequencies= 1

Negatives Eigenvalues: -256.540

#### THERMOCHEMICAL DATA

Temperature 298.150 Kelvin. Pressure 1.00000 Atm.

Zero-point correction= 0.373554

(Hartree/Particle)

Thermal correction to Energy= 0.400500

Thermal correction to Enthalpy= 0.401444

Thermal correction to Gibbs Free Energy= 0.313876

Sum of electronic and zero-point Energies= -1415.204144

Sum of electronic and thermal Energies= -1415.177198

Sum of electronic and thermal Enthalpies= -1415.176254

Sum of electronic and thermal Free Energies= -1415.263822

PCM-SP (solvent=THF;6-311+g(2d,p)) = -1415.88517817

Corrected Free Energy = -1415.57130222

-----

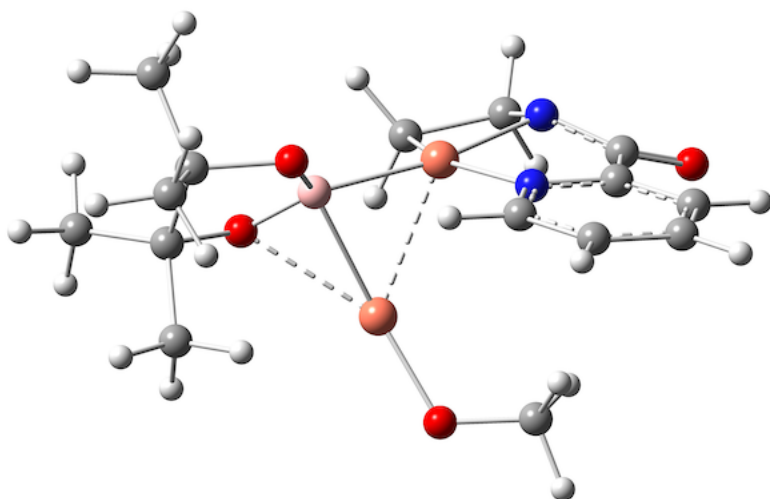

TS4 (Ref 33)      Substrate: N-(2picolinoyl)-aziridine  
 Alkoxide = Methoxide

#### CARTESIAN COORDINATES

|    |           |           |           |
|----|-----------|-----------|-----------|
| N  | 1.706603  | 0.775618  | -0.827387 |
| C  | 3.011617  | 0.438676  | -0.730982 |
| C  | 4.012582  | 1.405205  | -0.724480 |
| C  | 3.646817  | 2.747619  | -0.839603 |
| C  | 2.293610  | 3.083542  | -0.941902 |
| C  | 1.345120  | 2.061957  | -0.920991 |
| C  | 3.306366  | -1.049201 | -0.551871 |
| O  | 4.408826  | -1.442929 | -0.165122 |
| Cu | 0.590499  | -0.897140 | -0.559400 |
| N  | 2.212470  | -1.778379 | -0.859665 |
| C  | 1.868574  | -3.097927 | -0.332490 |
| C  | 0.368220  | -2.830052 | -0.133445 |
| B  | -1.340697 | -0.306285 | -0.341275 |
| Cu | -0.362419 | -0.091775 | 1.566672  |
| O  | -2.325852 | -0.841334 | 0.477652  |
| C  | -3.539487 | -0.018120 | 0.294797  |
| C  | -4.753006 | -0.929373 | 0.431668  |
| O  | -1.839054 | 0.614395  | -1.230673 |
| C  | -3.305322 | 0.573457  | -1.141679 |
| C  | -3.784069 | -0.347873 | -2.268635 |
| C  | -3.522605 | 1.034608  | 1.406508  |
| C  | -3.835083 | 1.988831  | -1.343242 |
| H  | 5.042819  | 1.083366  | -0.613924 |
| H  | 4.405869  | 3.525082  | -0.837922 |
| H  | 0.277290  | 2.249514  | -0.971401 |
| H  | 1.972292  | 4.117077  | -1.021636 |
| H  | 2.081383  | -3.906774 | -1.043557 |
| H  | -0.307437 | -3.246634 | -0.882039 |
| H  | -0.028959 | -2.921054 | 0.877297  |
| H  | -4.422525 | 1.657743  | 1.377284  |
| H  | -3.480164 | 0.528801  | 2.375994  |
| H  | -2.641338 | 1.680290  | 1.332765  |
| H  | -4.819989 | -1.302079 | 1.458652  |
| H  | -5.671964 | -0.374524 | 0.208138  |
| H  | -4.691452 | -1.789981 | -0.238162 |
| H  | -3.616582 | 2.322031  | -2.362970 |
| H  | -4.921820 | 2.014895  | -1.199749 |
| H  | -3.373656 | 2.694369  | -0.648562 |

|   |           |           |           |
|---|-----------|-----------|-----------|
| H | -4.877725 | -0.388435 | -2.313463 |
| H | -3.411098 | 0.036131  | -3.223180 |
| H | -3.400793 | -1.365109 | -2.139370 |
| H | 2.395824  | -3.313668 | 0.605105  |
| O | 0.467593  | 0.841271  | 2.879802  |
| C | 1.841915  | 1.103366  | 2.747055  |
| H | 2.448794  | 0.191108  | 2.605927  |
| H | 2.068136  | 1.776929  | 1.899563  |
| H | 2.205161  | 1.600706  | 3.662560  |

Electronic Energy = -1415.58241718 (Hartree/Particle)  
Dipole Moment (Debye): 8.0259  
index 0  
Harmonic frequencies  
Number of imaginary frequencies= 1  
Negatives Eigenvalues: -83.050

#### THERMOCHEMICAL DATA

Temperature 298.150 Kelvin. Pressure 1.00000 Atm.  
Zero-point correction= 0.374539  
(Hartree/Particle)  
Thermal correction to Energy= 0.400817  
Thermal correction to Enthalpy= 0.401761  
Thermal correction to Gibbs Free Energy= 0.316848  
Sum of electronic and zero-point Energies= -1415.207878  
Sum of electronic and thermal Energies= -1415.181601  
Sum of electronic and thermal Enthalpies= -1415.180656  
Sum of electronic and thermal Free Energies= -1415.265569  
PCM-SP (solvent=THF;6-311+g(2d,p)) = -1415.89420375  
Corrected Free Energy = -1415.57735557

-----  
Complex-2 (ref 33) Substrate: N-(2picolinoyl)-aziridine  
Alkoxide = t-Butoxide

#### CARTESIAN COORDINATES

|    |           |           |           |
|----|-----------|-----------|-----------|
| C  | 0.401004  | -3.365476 | 0.920998  |
| N  | -0.409839 | -2.836051 | -0.239141 |
| C  | -1.768830 | -3.297598 | -0.314443 |
| O  | -2.075960 | -4.442393 | -0.586147 |
| C  | 0.646803  | -3.839994 | -0.458783 |
| C  | -2.781486 | -2.224736 | -0.046025 |
| C  | -4.127899 | -2.550203 | 0.118389  |
| C  | -5.027850 | -1.514004 | 0.381783  |
| C  | -4.549095 | -0.206256 | 0.470956  |
| C  | -3.183249 | 0.040901  | 0.285867  |
| N  | -2.325081 | -0.957998 | 0.025995  |
| Cu | -0.025720 | 1.499994  | 0.190731  |
| H  | -4.441331 | -3.585871 | 0.042220  |
| H  | -6.084277 | -1.727875 | 0.518174  |
| H  | -2.747944 | 1.043424  | 0.345841  |
| H  | -5.216078 | 0.624671  | 0.679427  |
| H  | 0.304728  | -4.834865 | -0.730421 |
| H  | 1.495145  | -3.448608 | -1.010967 |
| H  | -0.135649 | -4.028847 | 1.595413  |
| Cu | -0.274453 | -0.717028 | -0.262774 |
| B  | 1.589648  | 0.179761  | -0.031200 |

|   |           |           |           |
|---|-----------|-----------|-----------|
| O | 2.280417  | -0.436075 | 1.023645  |
| O | 2.484026  | 0.567451  | -1.023765 |
| C | 3.704136  | -0.187205 | 0.845447  |
| C | 3.805027  | 0.053454  | -0.702219 |
| H | 1.049097  | -2.618361 | 1.371589  |
| C | 4.039575  | 1.059413  | 1.675665  |
| H | 3.753402  | 0.878628  | 2.716726  |
| H | 5.110286  | 1.290389  | 1.642742  |
| H | 3.478823  | 1.929283  | 1.319797  |
| C | 4.849854  | 1.081242  | -1.129760 |
| H | 5.854075  | 0.764303  | -0.822247 |
| H | 4.841009  | 1.183900  | -2.220032 |
| H | 4.643837  | 2.063593  | -0.698923 |
| C | 4.483258  | -1.392206 | 1.366309  |
| H | 5.555929  | -1.274257 | 1.170398  |
| H | 4.342412  | -1.482611 | 2.448825  |
| H | 4.145887  | -2.322966 | 0.902623  |
| C | 3.981679  | -1.241532 | -1.507563 |
| H | 3.830355  | -1.021906 | -2.569127 |
| H | 4.982546  | -1.668196 | -1.376820 |
| H | 3.240345  | -1.989249 | -1.208319 |
| O | -1.377936 | 2.703727  | 0.563543  |
| C | -1.599636 | 3.903380  | -0.135814 |
| C | -0.373303 | 4.829474  | -0.002876 |
| H | -0.164754 | 5.014655  | 1.057344  |
| H | 0.505805  | 4.337162  | -0.440176 |
| H | -0.520045 | 5.793615  | -0.509049 |
| C | -2.833765 | 4.586395  | 0.485819  |
| H | -3.068465 | 5.540883  | -0.004237 |
| H | -3.707421 | 3.927817  | 0.397868  |
| H | -2.655990 | 4.771290  | 1.551591  |
| C | -1.864566 | 3.611487  | -1.628838 |
| H | -0.992668 | 3.107432  | -2.065893 |
| H | -2.726587 | 2.939782  | -1.730053 |
| H | -2.065586 | 4.525413  | -2.204715 |

Electronic Energy = -1533.57718343 (Hartree/Particle)

Dipole Moment (Debye): 6.6515

index 0

Harmonic frequencies

Number of imaginary frequencies= 0

#### THERMOCHEMICAL DATA

Temperature 298.150 Kelvin. Pressure 1.00000 Atm.

Zero-point correction= 0.459879

(Hartree/Particle)

Thermal correction to Energy= 0.490966

Thermal correction to Enthalpy= 0.491910

Thermal correction to Gibbs Free Energy= 0.394036

Sum of electronic and zero-point Energies= -1533.117305

Sum of electronic and thermal Energies= -1533.086217

Sum of electronic and thermal Enthalpies= -1533.085273

Sum of electronic and thermal Free Energies= -1533.183147

PCM-SP (solvent=THF;6-311+g(2d,p)) = -1533.91623820

Corrected Free Energy = -1533.52220177

-----

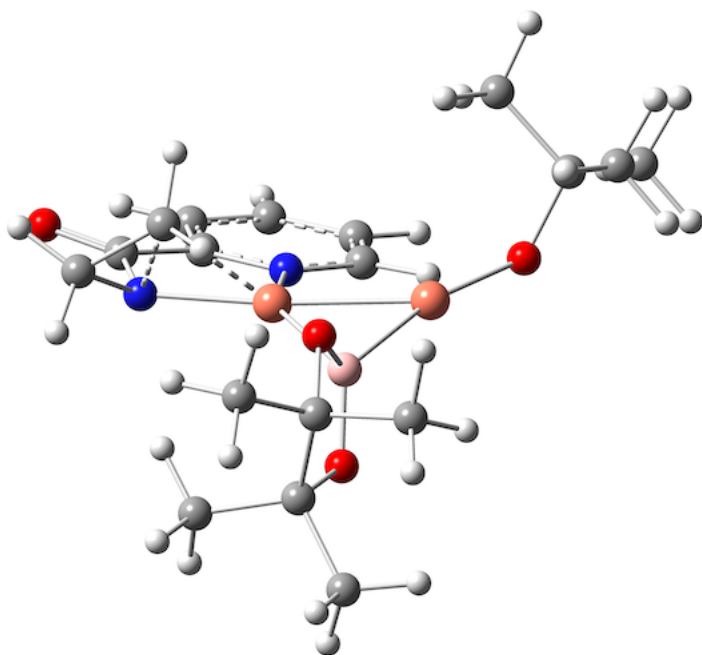

TS3 (Ref 33)      Substrate: N-(2picolinoyl)-aziridine  
 Alkoxide = t-Butoxide

#### CARTESIAN COORDINATES

|    |           |           |           |
|----|-----------|-----------|-----------|
| C  | 0.487855  | -1.951451 | 1.933296  |
| N  | -0.351896 | -2.729425 | 0.402550  |
| C  | -1.685449 | -3.159464 | 0.387427  |
| O  | -2.047379 | -4.244651 | 0.827376  |
| C  | 0.524325  | -3.333965 | 1.391324  |
| C  | -2.647156 | -2.205393 | -0.269065 |
| C  | -3.966053 | -2.579974 | -0.518254 |
| C  | -4.824078 | -1.631280 | -1.081769 |
| C  | -4.340174 | -0.349242 | -1.345301 |
| C  | -3.006440 | -0.046629 | -1.047476 |
| N  | -2.181252 | -0.972349 | -0.537698 |
| Cu | -0.024474 | 1.471402  | -0.205755 |
| H  | -4.292244 | -3.582086 | -0.261541 |
| H  | -5.857331 | -1.888041 | -1.298913 |
| H  | -2.584131 | 0.951871  | -1.173208 |
| H  | -4.979589 | 0.419055  | -1.769069 |
| H  | 0.057440  | -4.121926 | 1.984363  |
| H  | 1.480062  | -3.648605 | 0.969188  |
| H  | -0.308841 | -1.708299 | 2.629854  |
| Cu | -0.138033 | -0.823954 | 0.060066  |
| B  | 1.678003  | 0.381806  | -0.200974 |
| O  | 2.559451  | 0.341090  | 0.881421  |
| O  | 2.356301  | 0.140699  | -1.388398 |
| C  | 3.921401  | 0.318967  | 0.361304  |
| C  | 3.711255  | -0.286892 | -1.070446 |
| H  | 1.353476  | -1.294194 | 1.899211  |
| C  | 4.659862  | 0.241304  | -2.142334 |
| H  | 5.700706  | 0.009961  | -1.884766 |
| H  | 4.430803  | -0.231570 | -3.103037 |
| H  | 4.560357  | 1.321836  | -2.267606 |
| C  | 3.696375  | -1.821969 | -1.083213 |
| H  | 3.340045  | -2.164421 | -2.059692 |
| H  | 4.694036  | -2.239347 | -0.907643 |

|   |           |           |           |
|---|-----------|-----------|-----------|
| H | 3.012304  | -2.212000 | -0.322121 |
| C | 4.409932  | 1.772955  | 0.339726  |
| H | 4.332425  | 2.187588  | 1.349863  |
| H | 5.453681  | 1.841676  | 0.013641  |
| H | 3.791822  | 2.384867  | -0.324583 |
| C | 4.788503  | -0.517614 | 1.297794  |
| H | 5.800429  | -0.629288 | 0.890159  |
| H | 4.865110  | -0.022297 | 2.271557  |
| H | 4.367230  | -1.513750 | 1.457326  |
| O | -1.401342 | 2.652335  | -0.491361 |
| C | -1.970754 | 3.477877  | 0.495901  |
| C | -3.107925 | 4.281331  | -0.163807 |
| H | -3.600418 | 4.958351  | 0.546885  |
| H | -2.708080 | 4.873003  | -0.995236 |
| H | -3.862161 | 3.595388  | -0.569680 |
| C | -2.542177 | 2.617193  | 1.644662  |
| H | -3.289792 | 1.916689  | 1.252324  |
| H | -1.733869 | 2.027727  | 2.097891  |
| H | -3.012944 | 3.226262  | 2.428305  |
| C | -0.908282 | 4.444351  | 1.057049  |
| H | -0.096109 | 3.868051  | 1.520319  |
| H | -0.479264 | 5.035145  | 0.239488  |
| H | -1.322831 | 5.129329  | 1.809366  |

Electronic Energy = -1533.54822187 (Hartree/Particle)

Dipole Moment (Debye): 4.4280

index 0

Harmonic frequencies

Number of imaginary frequencies= 1

Negatives Eigenvalues: -253.913

#### THERMOCHEMICAL DATA

Temperature 298.150 Kelvin. Pressure 1.00000 Atm.

Zero-point correction= 0.458451  
(Hartree/Particle)

Thermal correction to Energy= 0.488885

Thermal correction to Enthalpy= 0.489829

Thermal correction to Gibbs Free Energy= 0.395081

Sum of electronic and zero-point Energies= -1533.089770

Sum of electronic and thermal Energies= -1533.059337

Sum of electronic and thermal Enthalpies= -1533.058393

Sum of electronic and thermal Free Energies= -1533.153141

PCM-SP (solvent=THF;6-311+g(2d,p)) = -1533.88806121

Corrected Free Energy = -1533.49298034

-----

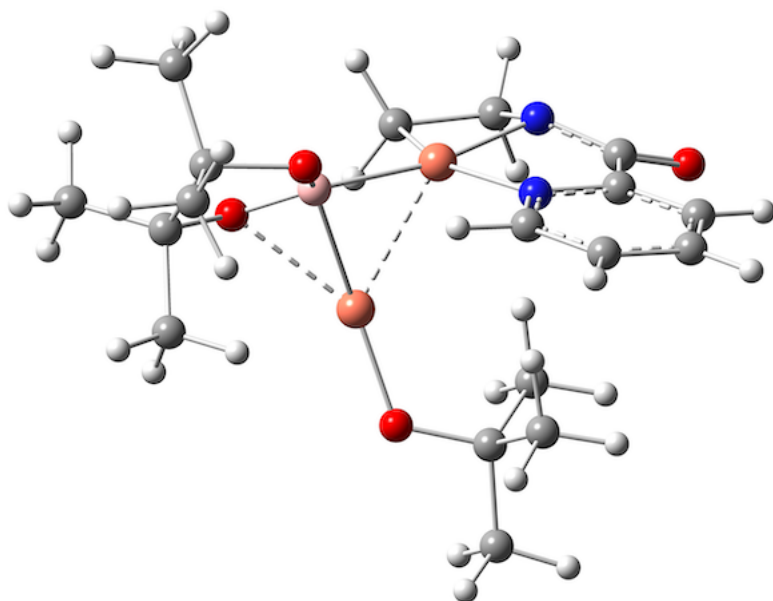

TS4 (Ref 33)      Substrate: N-(2picolinoyl)-aziridine  
 Alkoxide = t-Butoxide

#### CARTESIAN COORDINATES

|    |           |           |           |
|----|-----------|-----------|-----------|
| N  | -1.293969 | -1.581325 | 0.622329  |
| C  | -2.607927 | -1.672634 | 0.315693  |
| C  | -3.557067 | -1.998636 | 1.278848  |
| C  | -3.127430 | -2.257569 | 2.582000  |
| C  | -1.765214 | -2.175073 | 2.883662  |
| C  | -0.873322 | -1.822130 | 1.871510  |
| C  | -2.989372 | -1.321918 | -1.121688 |
| O  | -4.161483 | -1.115969 | -1.443492 |
| Cu | -0.299703 | -0.853978 | -0.988754 |
| N  | -1.881981 | -1.275899 | -1.887888 |
| C  | -1.675746 | -0.519465 | -3.118809 |
| C  | -0.199812 | -0.173063 | -2.867060 |
| B  | 1.581539  | -0.467829 | -0.359054 |
| Cu | 0.488290  | 1.408248  | -0.193404 |
| O  | 2.467606  | 0.493828  | -0.831458 |
| C  | 3.677733  | 0.435851  | 0.019541  |
| C  | 4.881532  | 0.765252  | -0.853993 |
| O  | 2.172151  | -1.319144 | 0.543145  |
| C  | 3.615676  | -1.041958 | 0.547372  |
| C  | 4.256620  | -2.058998 | -0.402785 |
| C  | 3.493792  | 1.491666  | 1.112419  |
| C  | 4.134097  | -1.233167 | 1.968348  |
| H  | -4.601669 | -2.026160 | 0.986581  |
| H  | -3.846006 | -2.513370 | 3.355899  |
| H  | 0.194004  | -1.717792 | 2.037697  |
| H  | -1.395828 | -2.365112 | 3.886357  |
| H  | -1.845245 | -1.115851 | -4.025293 |
| H  | 0.537122  | -0.798390 | -3.373537 |
| H  | 0.077337  | 0.880660  | -2.874199 |
| H  | 4.380661  | 1.558813  | 1.751177  |
| H  | 3.325563  | 2.466002  | 0.643543  |
| H  | 2.622087  | 1.273898  | 1.737964  |
| H  | 4.823080  | 1.807334  | -1.183570 |
| H  | 5.809925  | 0.637699  | -0.284739 |
| H  | 4.924366  | 0.130201  | -1.741611 |

|   |           |           |           |
|---|-----------|-----------|-----------|
| H | 4.040984  | -2.285467 | 2.255887  |
| H | 5.192566  | -0.953906 | 2.030286  |
| H | 3.571758  | -0.632499 | 2.686837  |
| H | 5.347495  | -1.961307 | -0.414566 |
| H | 4.001767  | -3.068677 | -0.066173 |
| H | 3.882923  | -1.937970 | -1.424547 |
| H | -2.319328 | 0.367975  | -3.162154 |
| O | -0.400853 | 2.797304  | 0.564166  |
| C | -1.802012 | 2.805041  | 0.731651  |
| C | -2.518032 | 2.370780  | -0.562501 |
| H | -2.202925 | 3.014454  | -1.392370 |
| H | -2.244451 | 1.337606  | -0.812744 |
| H | -3.610959 | 2.414939  | -0.474656 |
| C | -2.195731 | 1.858263  | 1.883321  |
| H | -1.683659 | 2.161477  | 2.803999  |
| H | -3.278937 | 1.851029  | 2.064493  |
| H | -1.877368 | 0.838714  | 1.639234  |
| C | -2.201196 | 4.250410  | 1.084639  |
| H | -3.282026 | 4.343307  | 1.254225  |
| H | -1.673574 | 4.569249  | 1.990926  |
| H | -1.913630 | 4.924959  | 0.269914  |

Electronic Energy = -1533.55523236 (Hartree/Particle)

Dipole Moment (Debye): 8.6247

index 0

Harmonic frequencies

Number of imaginary frequencies= 1

Negatives Eigenvalues: -85.071

#### THERMOCHEMICAL DATA

Temperature 298.150 Kelvin. Pressure 1.00000 Atm.

Zero-point correction= 0.459589  
(Hartree/Particle)

Thermal correction to Energy= 0.489407

Thermal correction to Enthalpy= 0.490351

Thermal correction to Gibbs Free Energy= 0.398846

Sum of electronic and zero-point Energies= -1533.095644

Sum of electronic and thermal Energies= -1533.065826

Sum of electronic and thermal Enthalpies= -1533.064881

Sum of electronic and thermal Free Energies= -1533.156387

PCM-SP (solvent=THF;6-311+g(2d,p)) = -1533.89881221

Corrected Free Energy = -1533.49996685

-----

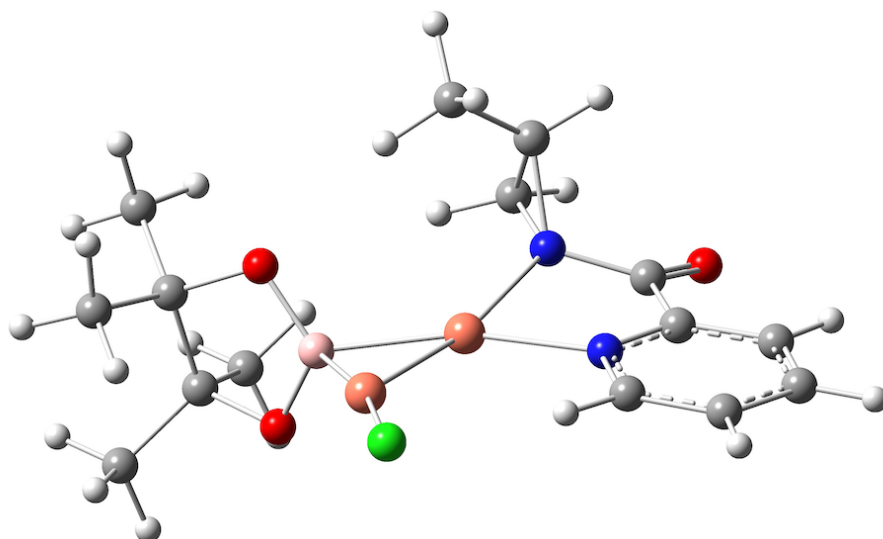

SUBSTRATE: N-(2-PICOLINOYL)-METHYL AZIRIDINE

Complex-2      Substrate: N-(2-picolinoyl)-methyl aziridine

CARTESIAN COORDINATES

|    |           |           |           |
|----|-----------|-----------|-----------|
| C  | -1.087225 | -2.709815 | 1.493532  |
| N  | -1.279327 | -2.050241 | 0.135376  |
| C  | -2.613626 | -2.128474 | -0.378018 |
| O  | -3.132381 | -3.156041 | -0.771487 |
| C  | -0.537778 | -3.320086 | 0.260848  |
| C  | -3.319844 | -0.805188 | -0.389961 |
| C  | -4.693401 | -0.736458 | -0.621802 |
| C  | -5.302288 | 0.521071  | -0.609400 |
| C  | -4.518751 | 1.651552  | -0.372655 |
| C  | -3.144100 | 1.497504  | -0.162898 |
| N  | -2.562083 | 0.289555  | -0.172630 |
| Cu | 0.396799  | 2.030615  | 0.177744  |
| H  | -5.250379 | -1.649475 | -0.802870 |
| H  | -6.370685 | 0.614489  | -0.782370 |
| H  | -2.482336 | 2.344121  | 0.011588  |
| H  | -4.952717 | 2.646350  | -0.355643 |
| H  | -1.023495 | -4.199195 | -0.154152 |
| H  | 0.522277  | -3.205389 | 0.054132  |
| C  | -0.255933 | -1.977807 | 2.513419  |
| H  | 0.024414  | -2.672803 | 3.315050  |
| H  | 0.654049  | -1.562353 | 2.071241  |
| Cu | -0.513246 | -0.063033 | -0.073272 |
| B  | 1.521662  | 0.267394  | -0.138902 |
| O  | 2.293574  | -0.272330 | 0.892179  |
| O  | 2.227188  | 0.242703  | -1.335895 |
| C  | 3.664502  | -0.402379 | 0.415643  |
| C  | 3.463910  | -0.498260 | -1.138041 |
| Cl | -0.381468 | 4.015674  | 0.513368  |
| C  | 4.403737  | 0.868607  | 0.855018  |
| H  | 4.324501  | 0.965835  | 1.942413  |
| H  | 5.464702  | 0.831791  | 0.583773  |
| H  | 3.954620  | 1.759573  | 0.405162  |
| C  | 4.294498  | -1.631495 | 1.065165  |
| H  | 5.300406  | -1.807330 | 0.665108  |

|   |           |           |           |
|---|-----------|-----------|-----------|
| H | 4.379330  | -1.474591 | 2.145744  |
| H | 3.692664  | -2.529061 | 0.900577  |
| C | 4.564045  | 0.152230  | -1.972613 |
| H | 5.531460  | -0.326840 | -1.777921 |
| H | 4.333817  | 0.040952  | -3.037399 |
| H | 4.650475  | 1.219635  | -1.757810 |
| C | 3.203397  | -1.928218 | -1.631035 |
| H | 2.867455  | -1.888542 | -2.672015 |
| H | 4.106630  | -2.546238 | -1.577730 |
| H | 2.415657  | -2.407387 | -1.040726 |
| H | -2.005618 | -3.167583 | 1.861582  |
| H | -0.827635 | -1.155798 | 2.959016  |

Electronic Energy = -1800.05719595 (Hartree/Particle)

Dipole Moment (Debye): 8.7936

index 0

Harmonic frequencies

Number of imaginary frequencies= 0

#### THERMOCHEMICAL DATA

Temperature 298.150 Kelvin. Pressure 1.00000 Atm.

Zero-point correction= 0.363783

(Hartree/Particle)

Thermal correction to Energy= 0.390722

Thermal correction to Enthalpy= 0.391666

Thermal correction to Gibbs Free Energy= 0.303896

Sum of electronic and zero-point Energies= -1799.693413

Sum of electronic and thermal Energies= -1799.666474

Sum of electronic and thermal Enthalpies= -1799.665530

Sum of electronic and thermal Free Energies= -1799.753300

PCM-SP (solvent=THF;6-311+g(2d,p)) = -1800.37640687

Corrected Free Energy = -1800.07251092

-----  
PATH: ANTI\_MARKOVNIKOV

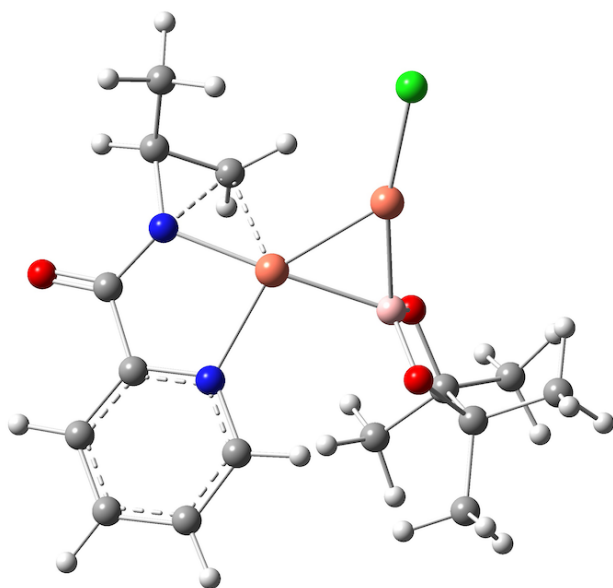

TS3 Substrate: N-(2-picolinoyl)-methyl aziridine

Path: anti-Markovnikov

# CARTESIAN COORDINATES

|    |           |           |           |
|----|-----------|-----------|-----------|
| C  | -1.758973 | -1.317001 | 1.715715  |
| N  | -2.649497 | -0.334468 | 0.327132  |
| C  | -3.153594 | 0.954571  | 0.487109  |
| O  | -4.191008 | 1.231398  | 1.079642  |
| C  | -3.152548 | -1.386208 | 1.205525  |
| C  | -2.346226 | 2.015010  | -0.223906 |
| C  | -2.830827 | 3.314046  | -0.368579 |
| C  | -2.036131 | 4.244547  | -1.042759 |
| C  | -0.788872 | 3.848972  | -1.531938 |
| C  | -0.368842 | 2.532724  | -1.322117 |
| N  | -1.139624 | 1.642352  | -0.686756 |
| Cu | 0.600545  | -2.181951 | -0.629164 |
| H  | -3.801752 | 3.566093  | 0.044125  |
| H  | -2.385421 | 5.263661  | -1.183176 |
| H  | 0.597017  | 2.161612  | -1.652390 |
| H  | -0.146865 | 4.542602  | -2.066065 |
| H  | -3.920605 | -1.023555 | 1.892746  |
| H  | -1.516336 | -0.601406 | 2.495363  |
| Cu | -0.747683 | -0.349472 | -0.111093 |
| B  | 1.372404  | -0.365828 | -0.026433 |
| O  | 2.104313  | 0.424744  | -0.905892 |
| O  | 1.844853  | -0.228674 | 1.272567  |
| C  | 3.290905  | 0.903979  | -0.202147 |
| C  | 2.829088  | 0.847026  | 1.296519  |
| H  | -1.062002 | -2.132270 | 1.539001  |
| C  | -3.541792 | -2.659879 | 0.474734  |
| H  | -3.735072 | -3.461498 | 1.196856  |
| H  | -4.449437 | -2.493588 | -0.114733 |
| Cl | 0.248859  | -4.251017 | -1.059405 |
| C  | 3.924315  | 0.488319  | 2.296263  |
| H  | 4.727281  | 1.235083  | 2.272900  |
| H  | 3.507526  | 0.465246  | 3.308623  |
| H  | 4.352208  | -0.494374 | 2.086273  |
| C  | 2.082781  | 2.108180  | 1.753144  |
| H  | 1.622853  | 1.913195  | 2.727357  |
| H  | 2.759530  | 2.963789  | 1.854500  |
| H  | 1.285728  | 2.370920  | 1.050305  |
| C  | 4.421664  | -0.079405 | -0.529072 |
| H  | 4.544516  | -0.129161 | -1.615503 |
| H  | 5.371298  | 0.237798  | -0.084288 |
| H  | 4.183331  | -1.085997 | -0.171748 |
| C  | 3.636302  | 2.297932  | -0.718839 |
| H  | 4.482800  | 2.716169  | -0.161251 |
| H  | 3.918916  | 2.239612  | -1.775275 |
| H  | 2.791511  | 2.985851  | -0.629506 |
| H  | -2.737564 | -2.983890 | -0.195698 |

Electronic Energy = -1800.02257319 (Hartree/Particle)

Dipole Moment (Debye): 11.1955

index 0

Harmonic frequencies

Number of imaginary frequencies= 1

Negatives Eigenvalues: -267.288

THERMOCHEMICAL DATA

Temperature 298.150 Kelvin. Pressure 1.00000 Atm.  
 Zero-point correction= 0.362067  
 (Hartree/Particle)  
 Thermal correction to Energy= 0.388523  
 Thermal correction to Enthalpy= 0.389467  
 Thermal correction to Gibbs Free Energy= 0.302924  
 Sum of electronic and zero-point Energies= -1799.660506  
 Sum of electronic and thermal Energies= -1799.634050  
 Sum of electronic and thermal Enthalpies= -1799.633106  
 Sum of electronic and thermal Free Energies= -1799.719649  
 PCM-SP (solvent=THF;6-311+g(2d,p)) = -1800.34339657  
 Corrected Free Energy = -1800.04047238

---

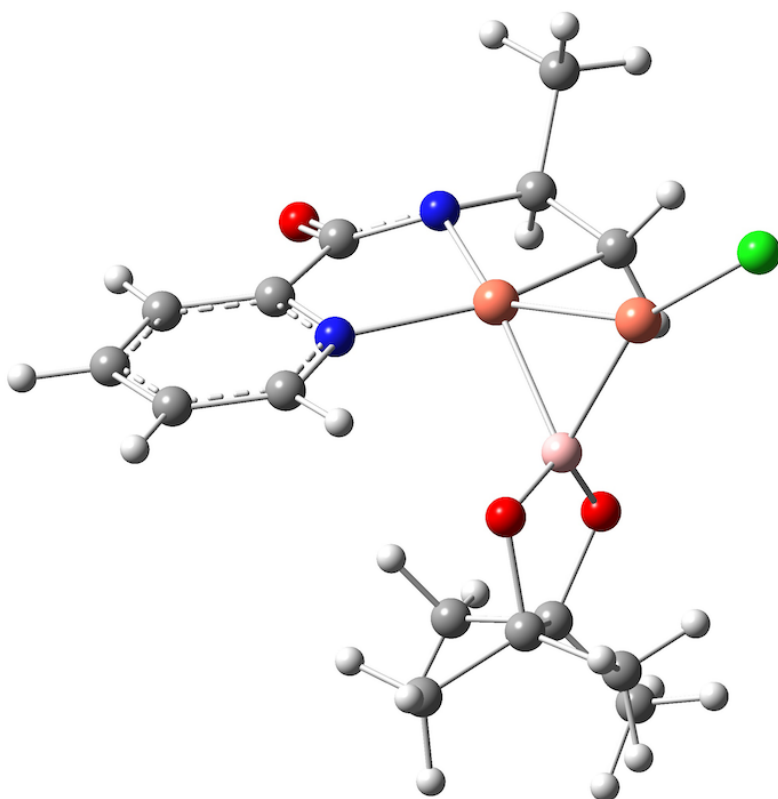

I2 Substrate: N-(2-picolinoyl)-methyl aziridine  
 Path: anti-Markovnikov

#### CARTESIAN COORDINATES

|    |           |           |           |
|----|-----------|-----------|-----------|
| C  | 0.873396  | 2.141956  | 1.320868  |
| N  | 2.503962  | 0.880601  | 0.506059  |
| C  | 3.211326  | -0.272038 | 0.562793  |
| O  | 4.158559  | -0.541918 | 1.302724  |
| C  | 2.357484  | 1.856565  | 1.586552  |
| C  | 2.688991  | -1.269389 | -0.462527 |
| C  | 3.414094  | -2.393933 | -0.842724 |
| C  | 2.853658  | -3.263868 | -1.780961 |
| C  | 1.582560  | -2.989954 | -2.292789 |
| C  | 0.902978  | -1.857436 | -1.842334 |
| N  | 1.453252  | -1.020083 | -0.951015 |
| Cu | -1.174951 | 1.873924  | -0.767374 |

|    |           |           |           |
|----|-----------|-----------|-----------|
| H  | 4.388790  | -2.559462 | -0.395702 |
| H  | 3.399357  | -4.145044 | -2.107059 |
| H  | -0.101567 | -1.610240 | -2.166588 |
| H  | 1.114830  | -3.641885 | -3.023688 |
| H  | 2.506464  | 1.374986  | 2.562610  |
| H  | 0.145721  | 1.837976  | 2.072339  |
| Cu | 0.739945  | 0.681587  | -0.063080 |
| B  | -1.313175 | 0.044332  | 0.100537  |
| O  | -1.852197 | -0.947869 | -0.690732 |
| O  | -1.560950 | -0.159024 | 1.441506  |
| C  | -2.735210 | -1.754466 | 0.158140  |
| C  | -2.129582 | -1.501785 | 1.584546  |
| H  | 0.644507  | 3.097970  | 0.847345  |
| C  | 3.281183  | 3.060898  | 1.450625  |
| H  | 3.059204  | 3.803447  | 2.227450  |
| H  | 4.325981  | 2.748559  | 1.552801  |
| Cl | -2.105846 | 3.580840  | -1.633514 |
| C  | -3.142920 | -1.484113 | 2.722833  |
| H  | -3.651705 | -2.452592 | 2.797253  |
| H  | -2.630365 | -1.293126 | 3.671233  |
| H  | -3.893178 | -0.703267 | 2.580316  |
| C  | -0.953257 | -2.427644 | 1.919089  |
| H  | -0.456844 | -2.059399 | 2.822320  |
| H  | -1.289443 | -3.453919 | 2.101315  |
| H  | -0.216622 | -2.438020 | 1.109034  |
| C  | -4.147333 | -1.186138 | -0.015926 |
| H  | -4.413398 | -1.214202 | -1.076996 |
| H  | -4.884061 | -1.771729 | 0.544551  |
| H  | -4.198369 | -0.144337 | 0.315233  |
| C  | -2.672138 | -3.200555 | -0.321854 |
| H  | -3.249527 | -3.851192 | 0.345457  |
| H  | -3.102083 | -3.274677 | -1.326171 |
| H  | -1.643757 | -3.568144 | -0.362765 |
| H  | 3.151301  | 3.530825  | 0.468648  |

Electronic Energy = -1800.03669862 (Hartree/Particle)

Dipole Moment (Debye): 9.5825

index 0

Harmonic frequencies

Number of imaginary frequencies= 0

#### THERMOCHEMICAL DATA

Temperature 298.150 Kelvin. Pressure 1.00000 Atm.

Zero-point correction= 0.363337

(Hartree/Particle)

Thermal correction to Energy= 0.389975

Thermal correction to Enthalpy= 0.390919

Thermal correction to Gibbs Free Energy= 0.304038

Sum of electronic and zero-point Energies= -1799.673362

Sum of electronic and thermal Energies= -1799.646724

Sum of electronic and thermal Enthalpies= -1799.645780

Sum of electronic and thermal Free Energies= -1799.732660

PCM-SP (solvent=THF;6-311+g(2d,p)) = -1800.35758090

Corrected Free Energy = -1800.05354228

-----

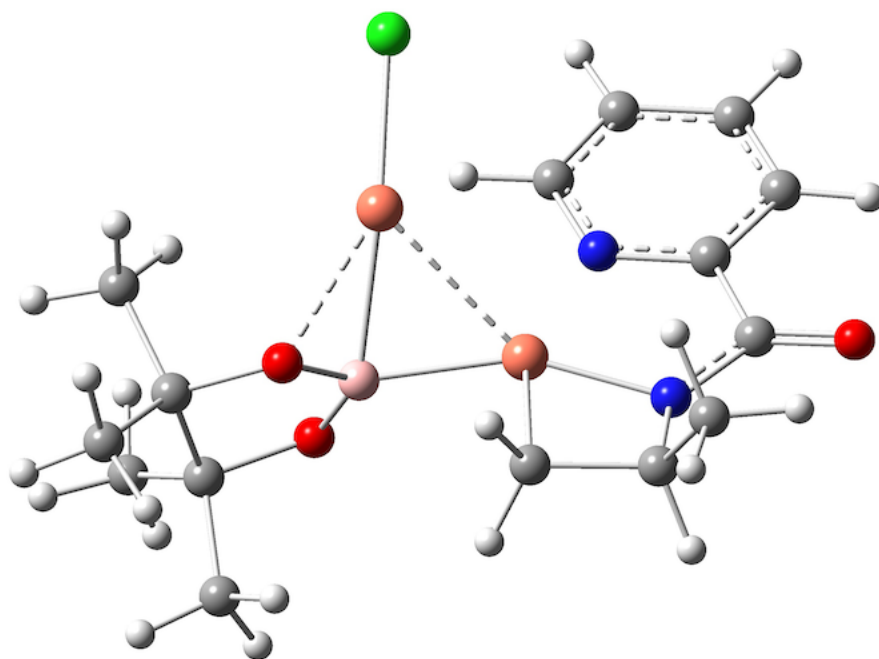

TS4      Substrate: N-(2-picolinoyl)-methyl aziridine  
Path: anti-Markovnikov

# CARTESIAN COORDINATES

|    |           |           |           |
|----|-----------|-----------|-----------|
| N  | 1.970245  | -0.690627 | 0.757446  |
| C  | 3.221220  | -0.172112 | 0.717847  |
| C  | 4.337076  | -0.935838 | 1.038944  |
| C  | 4.154277  | -2.268784 | 1.416483  |
| C  | 2.862737  | -2.796199 | 1.450887  |
| C  | 1.791264  | -1.972593 | 1.105352  |
| C  | 3.347982  | 1.279674  | 0.261586  |
| O  | 4.447550  | 1.804202  | 0.063215  |
| Cu | 0.621791  | 0.725407  | 0.162524  |
| N  | 2.123101  | 1.813776  | 0.142765  |
| C  | 1.613239  | 3.005727  | -0.517792 |
| C  | 0.144565  | 2.524862  | -0.562388 |
| B  | -1.358847 | 0.327620  | 0.279536  |
| Cu | -0.601814 | -1.075698 | -1.177419 |
| Cl | 0.119440  | -2.953817 | -1.870786 |
| O  | -2.295520 | 0.350218  | -0.752997 |
| C  | -3.609243 | 0.012432  | -0.158351 |
| C  | -4.679926 | 0.784440  | -0.918548 |
| O  | -1.946657 | 0.262555  | 1.513287  |
| C  | -3.393211 | 0.453604  | 1.332335  |
| C  | -3.667953 | 1.941630  | 1.574121  |
| C  | -3.795015 | -1.496145 | -0.336152 |
| C  | -4.120435 | -0.402589 | 2.362643  |
| H  | 5.315031  | -0.470157 | 0.974044  |
| H  | 5.009145  | -2.889820 | 1.669877  |
| H  | 0.772182  | -2.339329 | 1.071331  |
| H  | 2.677714  | -3.831161 | 1.718793  |
| H  | 1.731166  | 3.895943  | 0.117789  |
| H  | -0.547901 | 3.017608  | 0.122142  |
| H  | -0.287461 | 2.371651  | -1.552452 |
| H  | -4.776889 | -1.819547 | 0.024479  |
| H  | -3.713647 | -1.744285 | -1.398796 |

|   |           |           |           |
|---|-----------|-----------|-----------|
| H | -3.020837 | -2.059392 | 0.194719  |
| H | -4.740488 | 0.415515  | -1.947266 |
| H | -5.658465 | 0.641009  | -0.445263 |
| H | -4.461037 | 1.853983  | -0.953444 |
| H | -3.905593 | -0.029428 | 3.369006  |
| H | -5.204137 | -0.355019 | 2.202615  |
| H | -3.803851 | -1.446759 | 2.313880  |
| H | -4.739055 | 2.163839  | 1.520290  |
| H | -3.306423 | 2.211264  | 2.571172  |
| H | -3.145337 | 2.566412  | 0.842338  |
| C | 2.222363  | 3.272231  | -1.893408 |
| H | 1.738998  | 4.137603  | -2.363829 |
| H | 3.294824  | 3.467284  | -1.802086 |
| H | 2.086435  | 2.398124  | -2.542600 |

Electronic Energy = -1800.02788397 (Hartree/Particle)

Dipole Moment (Debye): 7.1813

index 0

Harmonic frequencies

Number of imaginary frequencies= 1

Negatives Eigenvalues: -81.232

#### THERMOCHEMICAL DATA

Temperature 298.150 Kelvin. Pressure 1.00000 Atm.

Zero-point correction= 0.362842

(Hartree/Particle)

Thermal correction to Energy= 0.388810

Thermal correction to Enthalpy= 0.389755

Thermal correction to Gibbs Free Energy= 0.304384

Sum of electronic and zero-point Energies= -1799.665041

Sum of electronic and thermal Energies= -1799.639074

Sum of electronic and thermal Enthalpies= -1799.638129

Sum of electronic and thermal Free Energies= -1799.723500

PCM-SP (solvent=THF;6-311+g(2d,p)) = -1800.34679723

Corrected Free Energy = -1800.04241326

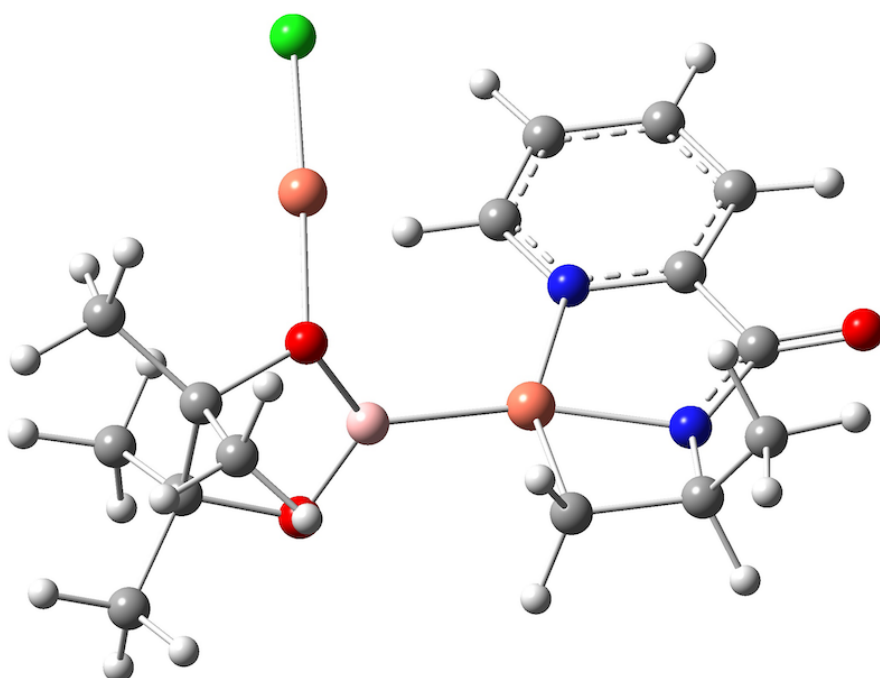

I3            Substrate: N-(2-picolinoyl)-methyl aziridine  
              Path: anti-Markovnikov

CARTESIAN COORDINATES

|    |           |           |           |
|----|-----------|-----------|-----------|
| C  | 2.577785  | -3.289328 | 1.822923  |
| C  | 2.144467  | -3.060149 | 0.375581  |
| Cu | 0.872765  | -0.973755 | -0.383087 |
| B  | -1.080189 | -0.781058 | -0.426512 |
| O  | -1.843789 | -0.192454 | 0.622188  |
| C  | -3.265187 | -0.620158 | 0.429787  |
| C  | -3.288794 | -0.853458 | -1.113989 |
| O  | -1.913070 | -1.282121 | -1.383498 |
| Cu | -1.305629 | 1.651651  | 0.884445  |
| Cl | -0.751655 | 3.677840  | 0.988057  |
| C  | 0.617349  | -2.850619 | 0.204623  |
| N  | 2.543454  | -1.769039 | -0.176239 |
| C  | 3.616938  | -0.992021 | 0.019846  |
| C  | 3.280173  | 0.438958  | -0.405913 |
| C  | 4.253994  | 1.428646  | -0.466844 |
| C  | 3.878326  | 2.727181  | -0.822559 |
| C  | 2.538202  | 2.995672  | -1.101177 |
| C  | 1.614798  | 1.953761  | -1.016240 |
| N  | 1.977021  | 0.707768  | -0.678533 |
| O  | 4.735487  | -1.282325 | 0.458610  |
| H  | 5.275405  | 1.157505  | -0.220519 |
| H  | 4.619983  | 3.519934  | -0.870371 |
| H  | 0.558886  | 2.121672  | -1.190972 |
| H  | 2.193520  | 3.992323  | -1.354832 |
| H  | 2.507641  | -3.888020 | -0.251805 |
| H  | 0.139210  | -3.410769 | -0.600822 |
| H  | 0.035844  | -2.885408 | 1.128927  |
| H  | 2.186821  | -4.246313 | 2.190973  |
| H  | 3.668781  | -3.293284 | 1.899003  |
| C  | -4.194221 | 0.467161  | 0.947799  |
| H  | -5.236361 | 0.180462  | 0.765552  |
| H  | -4.057970 | 0.593441  | 2.026553  |
| H  | -4.014092 | 1.432357  | 0.467984  |
| C  | -3.411159 | -1.901301 | 1.252476  |
| H  | -3.157327 | -1.688548 | 2.295382  |
| H  | -4.439823 | -2.273886 | 1.214428  |
| H  | -2.742432 | -2.687896 | 0.889500  |
| C  | -3.518641 | 0.432231  | -1.915638 |
| H  | -3.301470 | 0.234497  | -2.969518 |
| H  | -4.555348 | 0.774864  | -1.831900 |
| H  | -2.857472 | 1.237669  | -1.576888 |
| C  | -4.234013 | -1.957518 | -1.573435 |
| H  | -5.267354 | -1.717875 | -1.296186 |
| H  | -4.184854 | -2.052125 | -2.662649 |
| H  | -3.966784 | -2.923114 | -1.137946 |
| H  | 2.194876  | -2.484718 | 2.463875  |

Electronic Energy = -1800.03753226 (Hartree/Particle)

Dipole Moment (Debye): 7.2974

index 0

Harmonic frequencies

Number of imaginary frequencies= 0

THERMOCHEMICAL DATA

Temperature 298.150 Kelvin. Pressure 1.00000 Atm.  
 Zero-point correction= 0.363855  
 (Hartree/Particle)  
 Thermal correction to Energy= 0.390129  
 Thermal correction to Enthalpy= 0.391074  
 Thermal correction to Gibbs Free Energy= 0.305216  
 Sum of electronic and zero-point Energies= -1799.673677  
 Sum of electronic and thermal Energies= -1799.647403  
 Sum of electronic and thermal Enthalpies= -1799.646459  
 Sum of electronic and thermal Free Energies= -1799.732316  
 PCM-SP (solvent=THF;6-311+g(2d,p)) = -1800.35648856  
 Corrected Free Energy = -1800.05127230

---

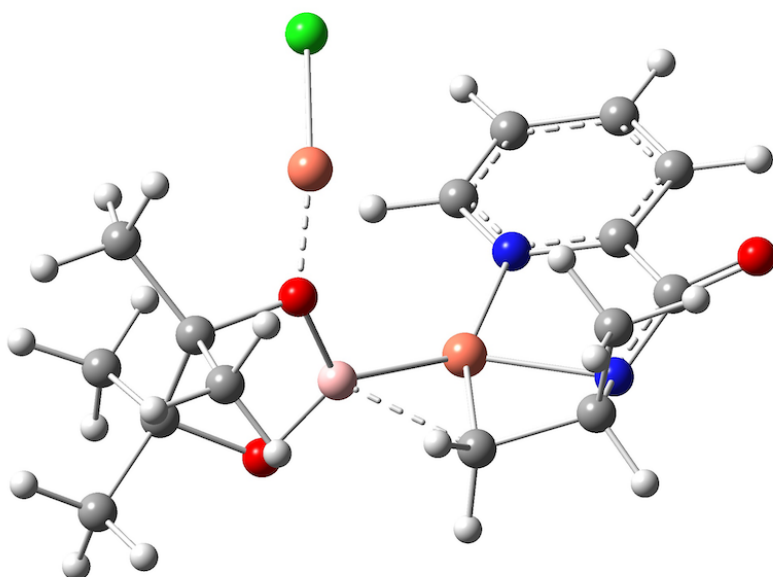

TS5      Substrate: N-(2-picolinoyl)-methyl aziridine  
             Path: anti-Markovnikov

#### CARTESIAN COORDINATES

|    |           |           |           |
|----|-----------|-----------|-----------|
| C  | 0.977814  | -3.035306 | 0.386676  |
| Cu | 0.653820  | -0.855318 | -0.747011 |
| B  | -1.286738 | -0.749970 | -0.506433 |
| O  | -1.802250 | -0.127463 | 0.665187  |
| C  | -3.288971 | -0.066826 | 0.507551  |
| C  | -3.420860 | -0.072614 | -1.053041 |
| O  | -2.257746 | -0.861486 | -1.463431 |
| Cu | -0.681246 | 1.449849  | 0.927619  |
| Cl | 0.371123  | 3.262312  | 1.105575  |
| C  | -0.348440 | -2.526551 | -0.285329 |
| N  | 1.968500  | -2.181067 | -0.279532 |
| C  | 3.069740  | -1.642627 | 0.258913  |
| C  | 3.289402  | -0.229136 | -0.309612 |
| C  | 4.522536  | 0.410034  | -0.225071 |
| C  | 4.642438  | 1.722945  | -0.684332 |
| C  | 3.516058  | 2.373693  | -1.190994 |
| C  | 2.304596  | 1.686957  | -1.221857 |
| N  | 2.197492  | 0.415344  | -0.805581 |
| O  | 3.848496  | -2.072126 | 1.122618  |

|   |           |           |           |
|---|-----------|-----------|-----------|
| H | 5.351309  | -0.134954 | 0.214322  |
| H | 5.598068  | 2.237938  | -0.632961 |
| H | 1.388445  | 2.162224  | -1.550679 |
| H | 3.557032  | 3.403773  | -1.529134 |
| H | 1.106741  | -4.100759 | 0.135878  |
| H | -0.533240 | -3.005131 | -1.251385 |
| H | -1.215104 | -2.681959 | 0.364310  |
| C | -3.814148 | 1.176594  | 1.208451  |
| H | -4.895564 | 1.260347  | 1.051486  |
| H | -3.628389 | 1.105623  | 2.284746  |
| H | -3.340755 | 2.091076  | 0.842386  |
| C | -3.819695 | -1.334515 | 1.177730  |
| H | -3.479866 | -1.360611 | 2.217456  |
| H | -4.914211 | -1.347357 | 1.169666  |
| H | -3.464953 | -2.238973 | 0.674688  |
| C | -3.263762 | 1.317215  | -1.679819 |
| H | -3.157033 | 1.204822  | -2.762808 |
| H | -4.137799 | 1.945262  | -1.479028 |
| H | -2.372670 | 1.830892  | -1.302590 |
| C | -4.675902 | -0.762523 | -1.576328 |
| H | -5.574130 | -0.254357 | -1.206594 |
| H | -4.686089 | -0.723102 | -2.669911 |
| H | -4.715256 | -1.812010 | -1.275630 |
| C | 0.938609  | -2.880857 | 1.910528  |
| H | 0.147965  | -3.508160 | 2.341213  |
| H | 1.900318  | -3.161158 | 2.346744  |
| H | 0.738713  | -1.834512 | 2.177592  |

Electronic Energy = -1800.02970367 (Hartree/Particle)

Dipole Moment (Debye): 8.3826

index 1

Number of imaginary frequencies= 1

Negatives Eigenvalues: -138.424

#### THERMOCHEMICAL DATA

Temperature 298.150 Kelvin. Pressure 1.00000 Atm.

Zero-point correction= 0.363414  
(Hartree/Particle)

Thermal correction to Energy= 0.388806

Thermal correction to Enthalpy= 0.389750

Thermal correction to Gibbs Free Energy= 0.307359

Sum of electronic and zero-point Energies= -1799.666290

Sum of electronic and thermal Energies= -1799.640898

Sum of electronic and thermal Enthalpies= -1799.639953

Sum of electronic and thermal Free Energies= -1799.722347

PCM-SP (solvent=THF;6-311+g(2d,p)) = -1800.35173892

Corrected Free Energy = -1800.04438225

-----

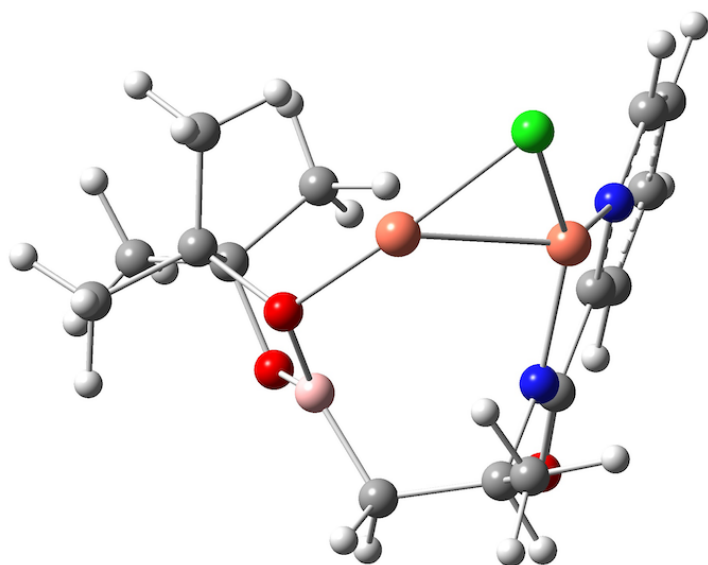

P2            Substrate: N-(2-picolinoyl)-methyl aziridine  
               Path: anti-Markovnikov

# CARTESIAN COORDINATES

|    |           |           |           |
|----|-----------|-----------|-----------|
| C  | -0.117690 | -0.765279 | 2.675057  |
| Cu | -1.073780 | -1.474893 | -0.163789 |
| B  | 1.561516  | 0.717258  | 1.299491  |
| O  | 2.256625  | 0.001471  | 0.271957  |
| C  | 2.798695  | 1.030777  | -0.668094 |
| C  | 1.758161  | 2.178763  | -0.470664 |
| O  | 1.394989  | 2.015643  | 0.927497  |
| Cu | 1.356519  | -1.556731 | -0.501793 |
| Cl | 0.028793  | -2.920989 | -1.562432 |
| C  | 1.137384  | 0.167765  | 2.703338  |
| N  | -0.965938 | -0.480102 | 1.512674  |
| C  | -1.765092 | 0.593837  | 1.609327  |
| C  | -2.633696 | 0.840852  | 0.379470  |
| C  | -3.468647 | 1.960681  | 0.332379  |
| C  | -4.246804 | 2.177298  | -0.804622 |
| C  | -4.169001 | 1.269863  | -1.865294 |
| C  | -3.310166 | 0.177598  | -1.740347 |
| N  | -2.563051 | -0.032911 | -0.646993 |
| O  | -1.862462 | 1.387158  | 2.566853  |
| H  | -3.481700 | 2.625844  | 1.188847  |
| H  | -4.905183 | 3.040227  | -0.864782 |
| H  | -3.208678 | -0.559162 | -2.533312 |
| H  | -4.758201 | 1.399473  | -2.768248 |
| H  | -0.698752 | -0.553834 | 3.581822  |
| H  | 0.896694  | 1.051640  | 3.304469  |
| H  | 1.973886  | -0.349146 | 3.194784  |
| C  | 2.876775  | 0.456822  | -2.075851 |
| H  | 3.265252  | 1.220234  | -2.759752 |
| H  | 3.562235  | -0.397126 | -2.098751 |
| H  | 1.904239  | 0.130643  | -2.453777 |
| C  | 4.197263  | 1.363198  | -0.144359 |
| H  | 4.795323  | 0.447194  | -0.110695 |
| H  | 4.699069  | 2.081104  | -0.800880 |

|   |           |           |           |
|---|-----------|-----------|-----------|
| H | 4.156195  | 1.784978  | 0.864443  |
| C | 0.476703  | 1.983473  | -1.290345 |
| H | -0.283695 | 2.677899  | -0.921525 |
| H | 0.647496  | 2.181445  | -2.353838 |
| H | 0.078590  | 0.969755  | -1.177212 |
| C | 2.321569  | 3.581874  | -0.667380 |
| H | 2.701372  | 3.704686  | -1.688503 |
| H | 1.528322  | 4.318126  | -0.505240 |
| H | 3.128047  | 3.794151  | 0.038572  |
| C | 0.273565  | -2.243489 | 2.689371  |
| H | 0.803768  | -2.496397 | 3.615611  |
| H | -0.617253 | -2.875645 | 2.605831  |
| H | 0.932082  | -2.495772 | 1.845766  |

Electronic Energy = -1800.12533328 (Hartree/Particle)

Dipole Moment (Debye): 6.8363

index 0

Harmonic frequencies

Number of imaginary frequencies= 0

#### THERMOCHEMICAL DATA

Temperature 298.150 Kelvin. Pressure 1.00000 Atm.

Zero-point correction= 0.365152

(Hartree/Particle)

Thermal correction to Energy= 0.391099

Thermal correction to Enthalpy= 0.392044

Thermal correction to Gibbs Free Energy= 0.308863

Sum of electronic and zero-point Energies= -1799.760182

Sum of electronic and thermal Energies= -1799.734234

Sum of electronic and thermal Enthalpies= -1799.733290

Sum of electronic and thermal Free Energies= -1799.816471

PCM-SP (solvent=THF;6-311+g(2d,p)) = -1800.44170581

Corrected Free Energy = -1800.13284353

-----  
PATH: MARKOVNIKOV

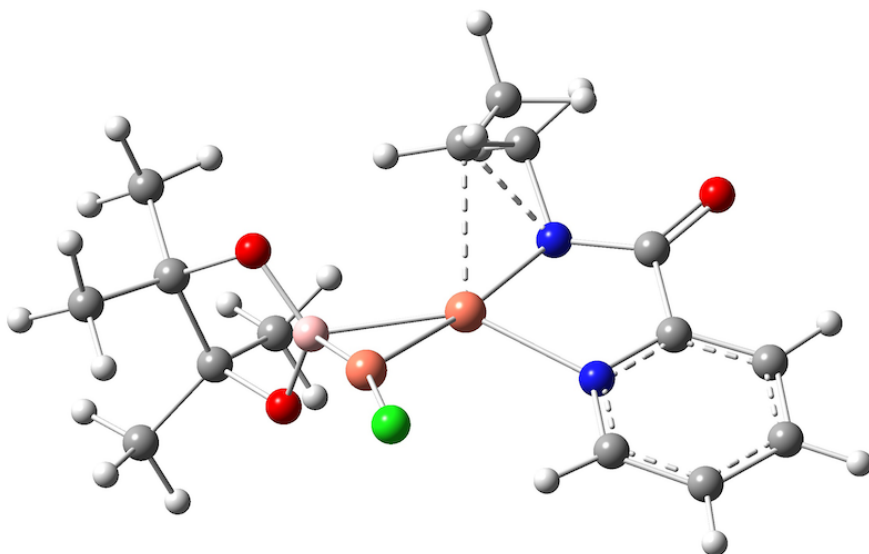

TS3        Substrate: N-(2-picolinoyl)-methyl aziridine  
          Path: Markovnikov

CARTESIAN COORDINATES

|    |           |           |           |
|----|-----------|-----------|-----------|
| C  | -0.160621 | -1.906567 | 1.640076  |
| N  | -1.190145 | -2.092050 | -0.028784 |
| C  | -2.577668 | -2.125931 | -0.094738 |
| O  | -3.258891 | -3.112122 | 0.175901  |
| C  | -0.546306 | -3.084798 | 0.818246  |
| C  | -3.211070 | -0.842051 | -0.568326 |
| C  | -4.567554 | -0.784256 | -0.881687 |
| C  | -5.107446 | 0.449584  | -1.254738 |
| C  | -4.282346 | 1.575204  | -1.274700 |
| C  | -2.934807 | 1.433101  | -0.930046 |
| N  | -2.415826 | 0.242906  | -0.601988 |
| Cu | 0.283401  | 1.875339  | 0.478912  |
| H  | -5.165402 | -1.686890 | -0.816288 |
| H  | -6.159749 | 0.531835  | -1.512392 |
| H  | -2.254992 | 2.279508  | -0.884483 |
| H  | -4.666914 | 2.554283  | -1.542212 |
| H  | -1.240306 | -3.794114 | 1.275906  |
| H  | 0.278584  | -3.594155 | 0.315160  |
| Cu | -0.450071 | -0.278240 | -0.013664 |
| B  | 1.582732  | 0.388204  | -0.074917 |
| O  | 2.462828  | -0.171389 | 0.850326  |
| O  | 2.136856  | 0.385228  | -1.344919 |
| C  | 3.760238  | -0.336519 | 0.201326  |
| C  | 3.355197  | -0.415387 | -1.312012 |
| Cl | -0.676595 | 3.737318  | 0.968738  |
| H  | 0.866591  | -1.551076 | 1.595503  |
| C  | -1.008454 | -1.440604 | 2.777451  |
| H  | -0.631729 | -1.926985 | 3.692674  |
| H  | -0.932919 | -0.358815 | 2.923390  |
| C  | 2.956730  | -1.828197 | -1.761065 |
| H  | 2.492603  | -1.767255 | -2.750297 |
| H  | 3.825158  | -2.493288 | -1.822422 |
| H  | 2.224415  | -2.266566 | -1.074430 |
| C  | 4.365313  | 0.185852  | -2.284079 |
| H  | 5.324789  | -0.341481 | -2.217922 |
| H  | 3.992071  | 0.091606  | -3.309106 |
| H  | 4.532255  | 1.246413  | -2.083077 |
| C  | 4.586851  | 0.908439  | 0.545863  |
| H  | 4.649952  | 1.002244  | 1.634591  |
| H  | 5.603028  | 0.839214  | 0.142328  |
| H  | 4.113698  | 1.815117  | 0.156261  |
| C  | 4.428150  | -1.589873 | 0.758771  |
| H  | 5.366412  | -1.794269 | 0.229286  |
| H  | 4.659433  | -1.444795 | 1.819358  |
| H  | 3.781480  | -2.466706 | 0.669443  |
| H  | -2.058370 | -1.722831 | 2.655482  |

Electronic Energy = -1800.02714147 (Hartree/Particle)

Dipole Moment (Debye): 6.4129

index 1

Number of imaginary frequencies= 1

Negatives Eigenvalues: -190.930

THERMOCHEMICAL DATA

Temperature 298.150 Kelvin. Pressure 1.00000 Atm.  
 Zero-point correction= 0.362121  
 (Hartree/Particle)  
 Thermal correction to Energy= 0.388657  
 Thermal correction to Enthalpy= 0.389601  
 Thermal correction to Gibbs Free Energy= 0.303194  
 Sum of electronic and zero-point Energies= -1799.665020  
 Sum of electronic and thermal Energies= -1799.638484  
 Sum of electronic and thermal Enthalpies= -1799.637540  
 Sum of electronic and thermal Free Energies= -1799.723947  
 PCM-SP (solvent=THF;6-311+g(2d,p)) = -1800.34663554  
 Corrected Free Energy = -1800.04344107

---

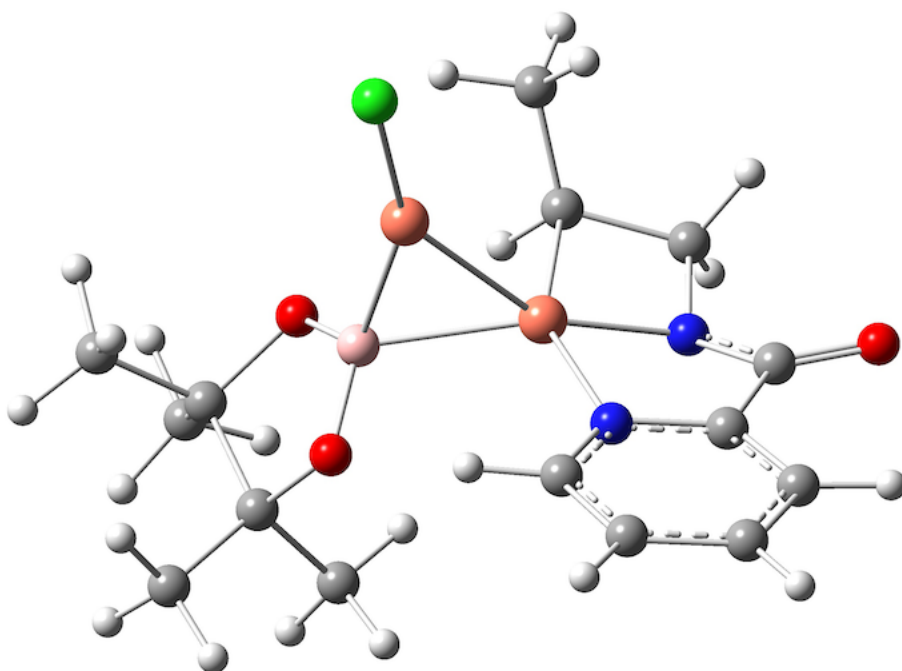

I2 Substrate: N-(2-picolinoyl)-methyl aziridine  
 Path: Markovnikov

#### CARTESIAN COORDINATES

|    |           |           |           |
|----|-----------|-----------|-----------|
| C  | -0.394249 | -1.593597 | -2.133975 |
| N  | -1.977476 | -0.078973 | -1.875421 |
| C  | -3.189006 | 0.299998  | -1.400605 |
| O  | -4.286754 | 0.105715  | -1.921992 |
| C  | -1.703020 | -1.160293 | -2.806068 |
| C  | -3.039332 | 1.053451  | -0.085581 |
| C  | -4.088590 | 1.756407  | 0.496931  |
| C  | -3.863247 | 2.394447  | 1.719818  |
| C  | -2.604772 | 2.303441  | 2.320696  |
| C  | -1.606030 | 1.567171  | 1.681643  |
| N  | -1.830325 | 0.963981  | 0.507819  |
| Cu | 0.398391  | -1.444889 | 1.167350  |
| H  | -5.047600 | 1.779500  | -0.010100 |
| H  | -4.661485 | 2.952551  | 2.201358  |
| H  | -0.607876 | 1.446070  | 2.090201  |

|    |           |           |           |
|----|-----------|-----------|-----------|
| H  | -2.396534 | 2.783422  | 3.271482  |
| H  | -2.476798 | -1.938698 | -2.781389 |
| H  | -1.585086 | -0.817724 | -3.842509 |
| Cu | -0.647259 | -0.288024 | -0.596675 |
| B  | 1.391171  | -0.050528 | 0.066788  |
| O  | 2.418136  | -0.435105 | -0.766617 |
| O  | 1.585977  | 1.212366  | 0.592868  |
| C  | 3.508122  | 0.528166  | -0.594194 |
| C  | 2.739274  | 1.802712  | -0.092156 |
| Cl | 0.168055  | -2.816333 | 2.777292  |
| H  | 0.515373  | -1.195961 | -2.587136 |
| C  | -0.287233 | -3.003572 | -1.615908 |
| H  | -1.121946 | -3.262782 | -0.956228 |
| H  | -0.319555 | -3.696450 | -2.474131 |
| C  | 2.168411  | 2.658512  | -1.229132 |
| H  | 1.481047  | 3.397994  | -0.806300 |
| H  | 2.960340  | 3.188655  | -1.769017 |
| H  | 1.607213  | 2.045201  | -1.941883 |
| C  | 3.504842  | 2.669405  | 0.901204  |
| H  | 4.425774  | 3.051863  | 0.445156  |
| H  | 2.889262  | 3.525482  | 1.196638  |
| H  | 3.765550  | 2.111887  | 1.803596  |
| C  | 4.453896  | -0.065471 | 0.456036  |
| H  | 4.789339  | -1.049661 | 0.114831  |
| H  | 5.333533  | 0.569947  | 0.605357  |
| H  | 3.946660  | -0.197630 | 1.416915  |
| C  | 4.224245  | 0.692221  | -1.930369 |
| H  | 4.990237  | 1.473775  | -1.861057 |
| H  | 4.717648  | -0.246689 | -2.201645 |
| H  | 3.529342  | 0.953737  | -2.732016 |
| H  | 0.645828  | -3.166586 | -1.070516 |

Electronic Energy = -1800.03685215 (Hartree/Particle)

Dipole Moment (Debye): 7.8243

index 0

Harmonic frequencies

Number of imaginary frequencies= 0

#### THERMOCHEMICAL DATA

Temperature 298.150 Kelvin. Pressure 1.00000 Atm.

Zero-point correction= 0.363284

(Hartree/Particle)

Thermal correction to Energy= 0.390038

Thermal correction to Enthalpy= 0.390982

Thermal correction to Gibbs Free Energy= 0.303141

Sum of electronic and zero-point Energies= -1799.673568

Sum of electronic and thermal Energies= -1799.646814

Sum of electronic and thermal Enthalpies= -1799.645870

Sum of electronic and thermal Free Energies= -1799.733711

PCM-SP (solvent=THF;6-311+g(2d,p)) = -1800.35676461

Corrected Free Energy = -1800.05362346

-----

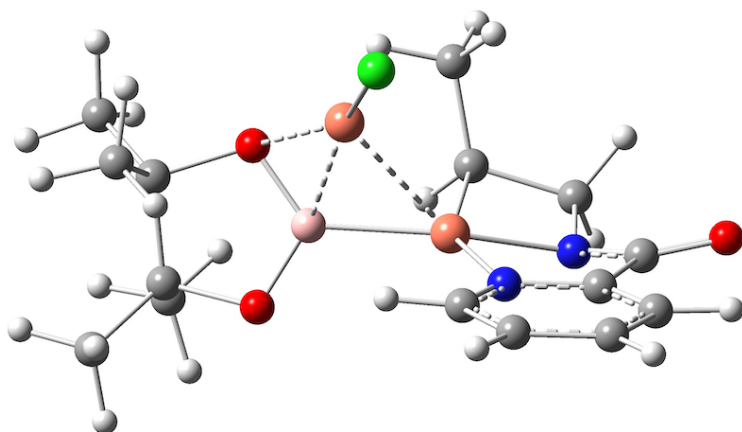

TS4      Substrate: N-(2-picolinoyl)-methyl aziridine  
 Path: Markovnikov

CARTESIAN COORDINATES

|    |           |           |           |
|----|-----------|-----------|-----------|
| N  | 2.043960  | -0.513115 | 0.831478  |
| C  | 3.276094  | 0.028346  | 0.698996  |
| C  | 4.429482  | -0.707834 | 0.946183  |
| C  | 4.300664  | -2.037184 | 1.356122  |
| C  | 3.025580  | -2.589926 | 1.487773  |
| C  | 1.916688  | -1.793544 | 1.202394  |
| C  | 3.327838  | 1.465365  | 0.194904  |
| O  | 4.376960  | 1.980285  | -0.198708 |
| Cu | 0.634487  | 0.863847  | 0.214330  |
| N  | 2.100578  | 2.019708  | 0.255738  |
| C  | 1.605442  | 3.149767  | -0.508679 |
| C  | 0.197421  | 2.585220  | -0.771824 |
| B  | -1.309955 | 0.321497  | 0.346155  |
| Cu | -0.470663 | -1.010133 | -1.165287 |
| Cl | 0.533387  | -2.712062 | -1.948726 |
| O  | -2.252446 | 0.212520  | -0.681451 |
| C  | -3.521272 | -0.252613 | -0.073496 |
| C  | -4.670559 | 0.379590  | -0.847697 |
| O  | -1.891552 | 0.217067  | 1.581360  |
| C  | -3.349745 | 0.244899  | 1.404243  |
| C  | -3.785615 | 1.699325  | 1.612409  |
| C  | -3.540793 | -1.776007 | -0.215728 |
| C  | -3.977091 | -0.660347 | 2.458291  |
| H  | 5.391504  | -0.228694 | 0.797146  |
| H  | 5.183653  | -2.637899 | 1.556442  |
| H  | 0.904736  | -2.180386 | 1.240531  |
| H  | 2.882755  | -3.624438 | 1.782163  |
| H  | 1.602463  | 4.082249  | 0.071190  |
| H  | -4.481020 | -2.196656 | 0.155400  |
| H  | -3.433112 | -2.038780 | -1.272612 |
| H  | -2.709364 | -2.237653 | 0.326532  |
| H  | -4.692393 | -0.018626 | -1.867087 |
| H  | -5.627173 | 0.142640  | -0.367263 |
| H  | -4.569248 | 1.465433  | -0.908806 |
| H  | -3.800437 | -0.242216 | 3.454314  |
| H  | -5.060161 | -0.734198 | 2.303855  |
| H  | -3.549508 | -1.665071 | 2.432409  |
| H  | -4.874774 | 1.801774  | 1.558743  |
| H  | -3.453261 | 2.030480  | 2.600994  |

|   |           |          |           |
|---|-----------|----------|-----------|
| H | -3.335254 | 2.359963 | 0.864265  |
| H | 2.175976  | 3.318793 | -1.432641 |
| C | -0.140344 | 2.249048 | -2.206475 |
| H | 0.638038  | 1.628188 | -2.664334 |
| H | -1.095603 | 1.725126 | -2.289959 |
| H | -0.198847 | 3.182544 | -2.790232 |
| H | -0.605884 | 3.077540 | -0.220315 |

Electronic Energy = -1800.02792406 (Hartree/Particle)  
Dipole Moment (Debye): 7.6917  
index 0  
Harmonic frequencies  
Number of imaginary frequencies= 1  
Negatives Eigenvalues: -82.020

#### THERMOCHEMICAL DATA

Temperature 298.150 Kelvin. Pressure 1.00000 Atm.  
Zero-point correction= 0.363138  
(Hartree/Particle)  
Thermal correction to Energy= 0.389075  
Thermal correction to Enthalpy= 0.390020  
Thermal correction to Gibbs Free Energy= 0.305246  
Sum of electronic and zero-point Energies= -1799.664786  
Sum of electronic and thermal Energies= -1799.638849  
Sum of electronic and thermal Enthalpies= -1799.637904  
Sum of electronic and thermal Free Energies= -1799.722678  
PCM-SP (solvent=THF;6-311+g(2d,p)) = -1800.34779585  
Corrected Free Energy = -1800.04254979

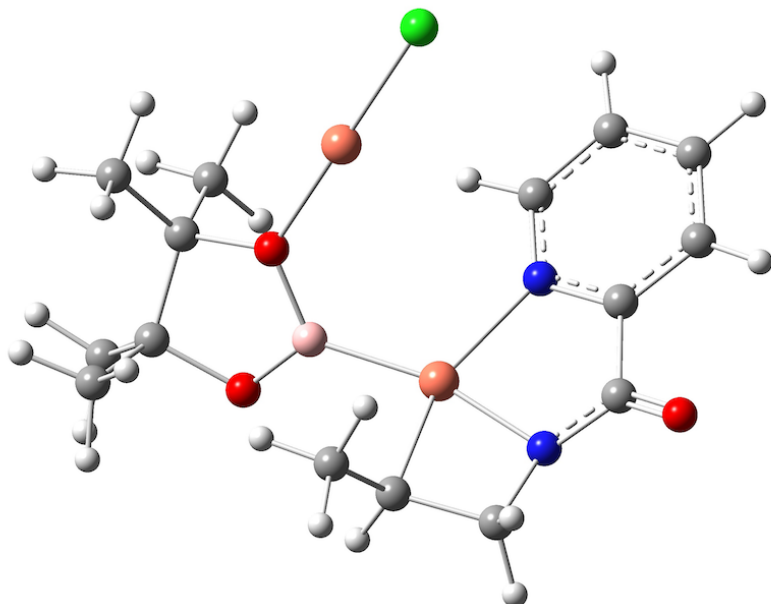

I3 Substrate: N-(2-picolinoyl)-methyl aziridine  
Path: Markovnikov

#### CARTESIAN COORDINATES

|   |          |           |          |
|---|----------|-----------|----------|
| N | 1.929477 | -0.266595 | 0.910762 |
| C | 3.196659 | 0.026109  | 0.530825 |
| C | 4.223969 | -0.905395 | 0.636390 |

|    |           |           |           |
|----|-----------|-----------|-----------|
| C  | 3.937961  | -2.167786 | 1.161555  |
| C  | 2.632848  | -2.460595 | 1.558735  |
| C  | 1.654564  | -1.479016 | 1.410398  |
| C  | 3.418273  | 1.405606  | -0.084362 |
| O  | 4.454277  | 1.677867  | -0.697846 |
| Cu | 0.711937  | 1.304926  | 0.362896  |
| N  | 2.346652  | 2.186277  | 0.147739  |
| C  | 1.920214  | 3.336509  | -0.634493 |
| C  | 0.412127  | 3.012296  | -0.655240 |
| B  | -1.201238 | 0.817754  | 0.405110  |
| Cu | -0.666254 | -1.841094 | -0.865156 |
| Cl | 0.466756  | -3.497035 | -1.483125 |
| O  | -1.715865 | -0.375680 | -0.165072 |
| C  | -3.125254 | -0.553350 | 0.290347  |
| C  | -3.910528 | -1.224721 | -0.827597 |
| O  | -2.226595 | 1.533668  | 0.952782  |
| C  | -3.512794 | 0.930328  | 0.596910  |
| C  | -4.030013 | 1.688651  | -0.630205 |
| C  | -3.060293 | -1.450247 | 1.528234  |
| C  | -4.467820 | 1.104054  | 1.773316  |
| H  | 5.212132  | -0.624108 | 0.287568  |
| H  | 4.719182  | -2.918070 | 1.245703  |
| H  | 0.618690  | -1.665443 | 1.674333  |
| H  | 2.360692  | -3.436696 | 1.945375  |
| H  | 2.152346  | 4.290590  | -0.142285 |
| H  | -4.063636 | -1.673457 | 1.904775  |
| H  | -2.575082 | -2.394848 | 1.259307  |
| H  | -2.480473 | -0.981342 | 2.329223  |
| H  | -3.541270 | -2.244545 | -0.981429 |
| H  | -4.971558 | -1.282447 | -0.559143 |
| H  | -3.815444 | -0.684951 | -1.771958 |
| H  | -4.680606 | 2.168035  | 1.916339  |
| H  | -5.415414 | 0.587796  | 1.579486  |
| H  | -4.039698 | 0.718353  | 2.701191  |
| H  | -5.031318 | 1.349323  | -0.915966 |
| H  | -4.079264 | 2.755223  | -0.390918 |
| H  | -3.362152 | 1.562824  | -1.487720 |
| H  | 2.367951  | 3.349413  | -1.638201 |
| C  | -0.193975 | 2.761190  | -2.019234 |
| H  | 0.357062  | 1.989166  | -2.567858 |
| H  | -1.242673 | 2.456245  | -1.955873 |
| H  | -0.143674 | 3.685568  | -2.617348 |
| H  | -0.202339 | 3.636653  | -0.003395 |

Electronic Energy = -1800.03653571 (Hartree/Particle)

Dipole Moment (Debye): 8.8354

index 0

Harmonic frequencies

Number of imaginary frequencies= 0

#### THERMOCHEMICAL DATA

Temperature 298.150 Kelvin. Pressure 1.00000 Atm.

Zero-point correction= 0.363978

(Hartree/Particle)

Thermal correction to Energy= 0.390383

Thermal correction to Enthalpy= 0.391327

Thermal correction to Gibbs Free Energy= 0.304940

Sum of electronic and zero-point Energies= -1799.672558

Sum of electronic and thermal Energies= -1799.646152

Sum of electronic and thermal Enthalpies= -1799.645208  
Sum of electronic and thermal Free Energies= -1799.731596  
PCM-SP (solvent=THF;6-311+g(2d,p)) = -1800.35759687  
Corrected Free Energy = -1800.05265716

---

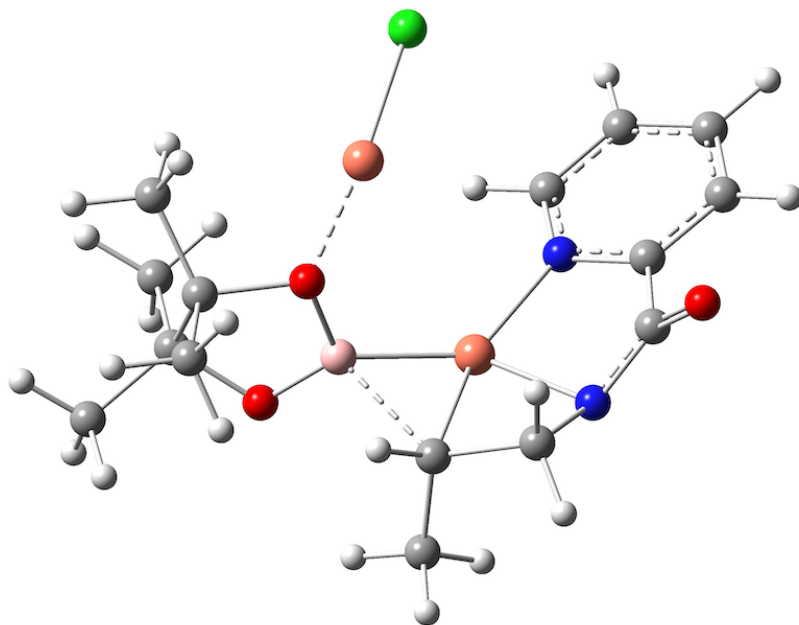

TS5      Substrate: N-(2-picolinoyl)-methyl aziridine  
Path: Markovnikov

#### CARTESIAN COORDINATES

|    |           |           |           |
|----|-----------|-----------|-----------|
| C  | 0.709728  | 2.906877  | -1.048611 |
| Cu | 0.614894  | 1.068904  | 0.589712  |
| B  | -1.299127 | 0.728479  | 0.296749  |
| O  | -1.654433 | -0.141069 | -0.773337 |
| C  | -3.132654 | -0.360112 | -0.680011 |
| C  | -3.368754 | -0.128029 | 0.850278  |
| O  | -2.335529 | 0.855337  | 1.180298  |
| Cu | -0.372549 | -1.619071 | -0.720429 |
| Cl | 0.821985  | -3.339922 | -0.519811 |
| C  | -0.548898 | 2.530941  | -0.196989 |
| N  | 1.815604  | 2.345359  | -0.270894 |
| C  | 2.790361  | 1.641074  | -0.867206 |
| C  | 3.212113  | 0.454122  | 0.008174  |
| C  | 4.469071  | -0.135867 | -0.085775 |
| C  | 4.746359  | -1.268627 | 0.680510  |
| C  | 3.745319  | -1.804724 | 1.493493  |
| C  | 2.496860  | -1.189595 | 1.509786  |
| N  | 2.242020  | -0.079495 | 0.798919  |
| O  | 3.285856  | 1.760898  | -1.997597 |
| H  | 5.191824  | 0.298655  | -0.768136 |
| H  | 5.724529  | -1.739492 | 0.631343  |
| H  | 1.666704  | -1.598924 | 2.073217  |
| H  | 3.908673  | -2.703550 | 2.078661  |
| H  | 0.750321  | 4.001616  | -1.165677 |
| H  | -1.425262 | 2.444515  | -0.850461 |
| C  | -3.466340 | -1.752196 | -1.194023 |

|   |           |           |           |
|---|-----------|-----------|-----------|
| H | -4.541101 | -1.937293 | -1.085038 |
| H | -3.211039 | -1.829719 | -2.255469 |
| H | -2.925905 | -2.535842 | -0.657310 |
| C | -3.759636 | 0.711825  | -1.572261 |
| H | -3.354833 | 0.618539  | -2.584469 |
| H | -4.846158 | 0.588040  | -1.620163 |
| H | -3.548966 | 1.721412  | -1.206832 |
| C | -3.094459 | -1.371196 | 1.703383  |
| H | -3.074374 | -1.077377 | 2.757080  |
| H | -3.875242 | -2.126536 | 1.567379  |
| H | -2.127319 | -1.823533 | 1.458383  |
| C | -4.727193 | 0.473628  | 1.193610  |
| H | -5.534062 | -0.193757 | 0.869262  |
| H | -4.806240 | 0.604343  | 2.277264  |
| H | -4.866966 | 1.449993  | 0.724028  |
| C | -0.810851 | 3.528060  | 0.933153  |
| H | 0.097697  | 3.693462  | 1.520959  |
| H | -1.101771 | 4.493651  | 0.495966  |
| H | -1.608280 | 3.195577  | 1.602378  |
| H | 0.664971  | 2.467879  | -2.054677 |

Electronic Energy = -1800.02666080 (Hartree/Particle)

Dipole Moment (Debye): 8.6356

index 0

Harmonic frequencies

Number of imaginary frequencies= 1

Negatives Eigenvalues: -143.049

#### THERMOCHEMICAL DATA

Temperature 298.150 Kelvin. Pressure 1.00000 Atm.

Zero-point correction= 0.363669

(Hartree/Particle)

Thermal correction to Energy= 0.389141

Thermal correction to Enthalpy= 0.390085

Thermal correction to Gibbs Free Energy= 0.307696

Sum of electronic and zero-point Energies= -1799.662992

Sum of electronic and thermal Energies= -1799.637520

Sum of electronic and thermal Enthalpies= -1799.636576

Sum of electronic and thermal Free Energies= -1799.718964

PCM-SP (solvent=THF;6-311+g(2d,p)) = -1800.35044651

Corrected Free Energy = -1800.04274971

-----

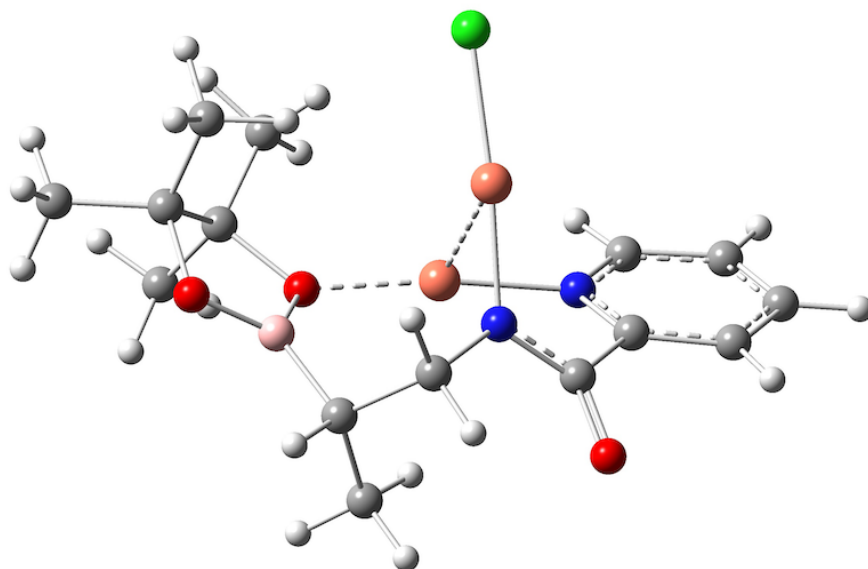

P2            Substrate: N-(2-picolinoyl)-methyl aziridine  
               Path: Markovnikov

#### CARTESIAN COORDINATES

|    |           |           |           |
|----|-----------|-----------|-----------|
| C  | -0.071125 | 1.952779  | 1.759067  |
| Cu | -0.387242 | -0.018054 | -0.964649 |
| B  | 1.911430  | 1.392783  | 0.177509  |
| O  | 3.199224  | 1.161057  | 0.544167  |
| C  | 3.635264  | -0.127104 | -0.000813 |
| C  | 2.682442  | -0.322711 | -1.234822 |
| O  | 1.502691  | 0.476932  | -0.813087 |
| Cu | -0.541361 | -0.882801 | 1.454538  |
| Cl | 0.058004  | -2.913554 | 1.609404  |
| C  | 0.981534  | 2.521149  | 0.758422  |
| N  | -0.962647 | 0.958963  | 1.136070  |
| C  | -2.191803 | 1.395492  | 0.766261  |
| C  | -2.977228 | 0.438783  | -0.123422 |
| C  | -4.364611 | 0.350993  | -0.006133 |
| C  | -5.066710 | -0.507014 | -0.849763 |
| C  | -4.365328 | -1.233825 | -1.816727 |
| C  | -2.987110 | -1.069778 | -1.903873 |
| N  | -2.305104 | -0.255453 | -1.075129 |
| O  | -2.721428 | 2.487233  | 1.020806  |
| H  | -4.857239 | 0.959324  | 0.744228  |
| H  | -6.144725 | -0.607402 | -0.759179 |
| H  | -2.395295 | -1.594846 | -2.645800 |
| H  | -4.872346 | -1.910803 | -2.496697 |
| H  | -0.666239 | 2.782655  | 2.156970  |
| H  | 1.628242  | 3.186480  | 1.348758  |
| C  | 3.417396  | -1.162994 | 1.104657  |
| H  | 3.778891  | -2.150982 | 0.801854  |
| H  | 3.971474  | -0.847802 | 1.994270  |
| H  | 2.361660  | -1.261497 | 1.374029  |
| C  | 5.113594  | -0.019870 | -0.359903 |
| H  | 5.699514  | 0.120160  | 0.553682  |
| H  | 5.455819  | -0.940004 | -0.847523 |
| H  | 5.312247  | 0.825834  | -1.022648 |
| C  | 2.223753  | -1.753880 | -1.477710 |
| H  | 1.557544  | -1.783928 | -2.348222 |

|   |           |           |           |
|---|-----------|-----------|-----------|
| H | 3.085861  | -2.395620 | -1.691446 |
| H | 1.684819  | -2.161184 | -0.618210 |
| C | 3.178973  | 0.332879  | -2.523174 |
| H | 4.030889  | -0.214844 | -2.938532 |
| H | 2.370774  | 0.326720  | -3.261805 |
| H | 3.478726  | 1.371756  | -2.353358 |
| C | 0.307700  | 3.353227  | -0.353533 |
| H | -0.359840 | 2.736681  | -0.967663 |
| H | -0.301911 | 4.155651  | 0.076081  |
| H | 1.050132  | 3.803251  | -1.024334 |
| H | 0.447177  | 1.476576  | 2.598487  |

Electronic Energy = -1800.13343971 (Hartree/Particle)

Dipole Moment (Debye): 6.9196

index 0

Harmonic frequencies

Number of imaginary frequencies= 0

#### THERMOCHEMICAL DATA

Temperature 298.150 Kelvin. Pressure 1.00000 Atm.

Zero-point correction= 0.366778

(Hartree/Particle)

Thermal correction to Energy= 0.392409

Thermal correction to Enthalpy= 0.393353

Thermal correction to Gibbs Free Energy= 0.311753

Sum of electronic and zero-point Energies= -1799.766661

Sum of electronic and thermal Energies= -1799.741031

Sum of electronic and thermal Enthalpies= -1799.740087

Sum of electronic and thermal Free Energies= -1799.821687

PCM-SP (solvent=THF;6-311+g(2d,p)) = -1800.45193594

Corrected Free Energy = -1800.14018323

SUBSTRATE: 1c

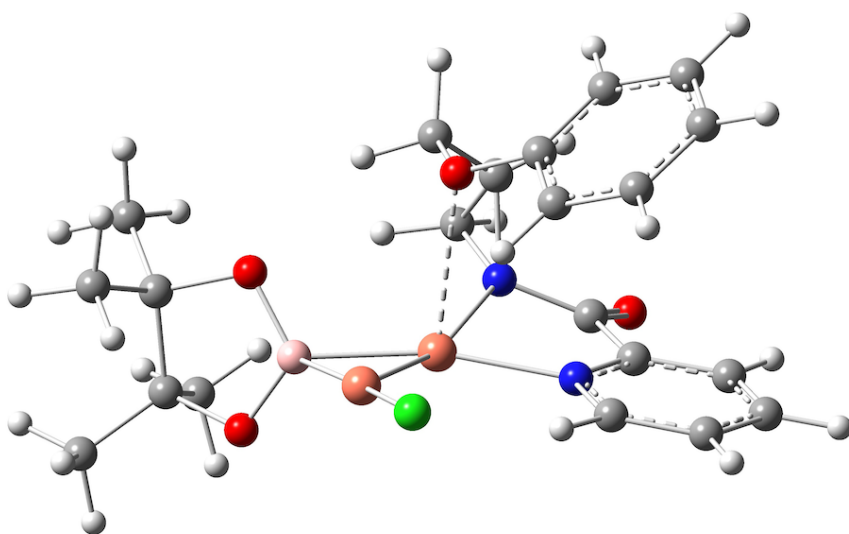

Complex-2

Substrate: 1c

#### CARTESIAN COORDINATES

|   |           |           |          |
|---|-----------|-----------|----------|
| C | -0.675681 | -2.517430 | 1.139506 |
|---|-----------|-----------|----------|

|    |           |           |           |
|----|-----------|-----------|-----------|
| N  | -0.432016 | -2.201179 | -0.310580 |
| C  | -1.535437 | -2.522324 | -1.171984 |
| O  | -1.810629 | -3.654713 | -1.517914 |
| C  | 0.271995  | -3.322403 | 0.323363  |
| C  | -2.316464 | -1.319282 | -1.602499 |
| C  | -3.592535 | -1.461115 | -2.145870 |
| C  | -4.289292 | -0.303807 | -2.502135 |
| C  | -3.683483 | 0.937935  | -2.309055 |
| C  | -2.394078 | 0.991380  | -1.770933 |
| N  | -1.727688 | -0.118935 | -1.428000 |
| Cu | 0.833851  | 2.030227  | -0.401055 |
| H  | -4.013040 | -2.453091 | -2.271067 |
| H  | -5.289730 | -0.372946 | -2.919638 |
| H  | -1.872960 | 1.930400  | -1.597296 |
| H  | -4.192925 | 1.861066  | -2.566739 |
| H  | -0.025342 | -4.320214 | 0.012045  |
| H  | 1.337243  | -3.142118 | 0.438163  |
| H  | -1.646657 | -2.975014 | 1.316127  |
| C  | -0.210824 | -1.476625 | 2.143267  |
| H  | -0.460860 | -1.810209 | 3.160258  |
| H  | 0.868345  | -1.331853 | 2.065798  |
| O  | -0.736407 | -0.181682 | 1.879816  |
| C  | -2.073765 | 0.099188  | 2.023030  |
| C  | -2.450303 | 1.375413  | 1.580329  |
| C  | -3.024113 | -0.774918 | 2.561703  |
| C  | -3.782791 | 1.767219  | 1.670248  |
| H  | -1.691728 | 2.036763  | 1.169444  |
| C  | -4.362337 | -0.364396 | 2.644305  |
| H  | -2.744078 | -1.755564 | 2.932025  |
| C  | -4.750022 | 0.899137  | 2.197414  |
| H  | -4.064148 | 2.758875  | 1.325185  |
| H  | -5.098319 | -1.044714 | 3.065803  |
| H  | -5.789077 | 1.209490  | 2.265522  |
| Cu | 0.189212  | -0.147938 | -0.676365 |
| B  | 2.138701  | 0.364279  | -0.230853 |
| O  | 2.592316  | -0.109124 | 1.006430  |
| O  | 3.171758  | 0.337051  | -1.160214 |
| C  | 4.045003  | -0.201506 | 0.958281  |
| C  | 4.311314  | -0.355442 | -0.580075 |
| Cl | -0.294217 | 3.879461  | -0.448615 |
| C  | 4.588959  | 1.109561  | 1.541243  |
| H  | 4.188747  | 1.240583  | 2.551666  |
| H  | 5.683325  | 1.102916  | 1.596782  |
| H  | 4.270833  | 1.967270  | 0.940568  |
| C  | 4.489262  | -1.384273 | 1.814838  |
| H  | 5.572531  | -1.535423 | 1.734771  |
| H  | 4.248997  | -1.189967 | 2.865745  |
| H  | 3.987932  | -2.309503 | 1.517935  |
| C  | 5.594766  | 0.300397  | -1.082312 |
| H  | 6.472124  | -0.142531 | -0.594956 |
| H  | 5.688444  | 0.147777  | -2.162619 |
| H  | 5.593935  | 1.376389  | -0.894447 |
| C  | 4.234630  | -1.809234 | -1.068026 |
| H  | 4.223965  | -1.814799 | -2.162478 |
| H  | 5.091412  | -2.399168 | -0.723402 |
| H  | 3.313205  | -2.289366 | -0.721977 |

Electronic Energy = -2106.33708712 (Hartree/Particle)

Dipole Moment (Debye): 8.9849

index 0

Harmonic frequencies  
Number of imaginary frequencies= 0

#### THERMOCHEMICAL DATA

Temperature 298.150 Kelvin. Pressure 1.00000 Atm.  
Zero-point correction= 0.450209  
(Hartree/Particle)  
Thermal correction to Energy= 0.482319  
Thermal correction to Enthalpy= 0.483263  
Thermal correction to Gibbs Free Energy= 0.383962  
Sum of electronic and zero-point Energies= -2105.886878  
Sum of electronic and thermal Energies= -2105.854768  
Sum of electronic and thermal Enthalpies= -2105.853824  
Sum of electronic and thermal Free Energies= -2105.953125  
PCM-SP (solvent=THF;6-311+g(2d,p)) = -2106.73911105  
Corrected Free Energy = -2106.35514893

-----  
PATH: ANTI\_MARKOVNIKOV

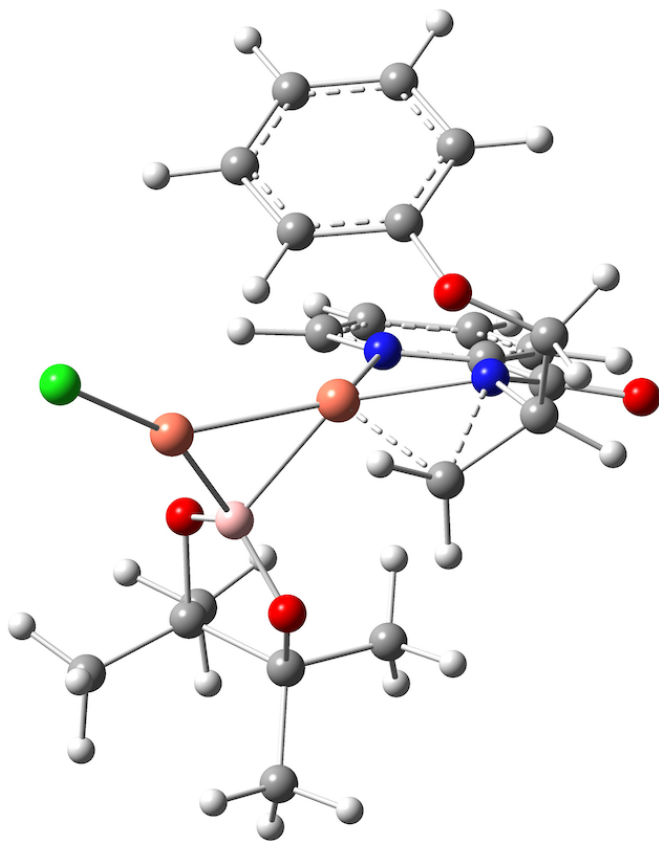

TS3 Substrate: 1c  
Path: anti-Markovnikov

#### CARTESIAN COORDINATES

|   |           |          |          |
|---|-----------|----------|----------|
| C | -0.939688 | 0.028723 | 2.339981 |
| N | -1.423217 | 1.330809 | 1.138654 |
| C | -0.898309 | 2.604318 | 0.919365 |
| O | -1.123135 | 3.571763 | 1.640774 |
| C | -1.995004 | 1.062073 | 2.443570 |

|    |           |           |           |
|----|-----------|-----------|-----------|
| C  | -0.112207 | 2.740730  | -0.356306 |
| C  | 0.348875  | 3.987204  | -0.780848 |
| C  | 1.082851  | 4.050986  | -1.966591 |
| C  | 1.344807  | 2.872669  | -2.671151 |
| C  | 0.868578  | 1.663316  | -2.161227 |
| N  | 0.143678  | 1.609923  | -1.037686 |
| Cu | 0.136511  | -2.333519 | -0.203162 |
| H  | 0.133632  | 4.863855  | -0.179649 |
| H  | 1.452393  | 5.005127  | -2.331839 |
| H  | 1.080744  | 0.709440  | -2.632014 |
| H  | 1.914669  | 2.882407  | -3.595015 |
| H  | -1.814171 | 1.863169  | 3.165469  |
| H  | 0.046986  | 0.211354  | 2.751928  |
| Cu | -0.341206 | -0.045167 | 0.123862  |
| B  | 1.590508  | -0.961121 | 0.139814  |
| O  | 2.498910  | -0.745689 | -0.887758 |
| O  | 2.164013  | -0.669447 | 1.375345  |
| C  | 3.816703  | -0.535938 | -0.299235 |
| C  | 3.454674  | -0.029718 | 1.141185  |
| H  | -1.223014 | -0.999818 | 2.131932  |
| C  | -3.461233 | 0.637461  | 2.444179  |
| H  | -3.746775 | 0.342171  | 3.458564  |
| H  | -4.081705 | 1.493632  | 2.152378  |
| O  | -3.715304 | -0.508041 | 1.641302  |
| C  | -3.664212 | -0.397643 | 0.261020  |
| C  | -3.096085 | -1.482167 | -0.412953 |
| C  | -4.153191 | 0.702384  | -0.450919 |
| C  | -2.980357 | -1.453589 | -1.805647 |
| H  | -2.734723 | -2.337779 | 0.147841  |
| C  | -4.035741 | 0.719399  | -1.843961 |
| H  | -4.602907 | 1.545293  | 0.063499  |
| C  | -3.443042 | -0.348516 | -2.527207 |
| H  | -2.509986 | -2.298253 | -2.300953 |
| H  | -4.410073 | 1.578438  | -2.395727 |
| H  | -3.349729 | -0.321108 | -3.609511 |
| Cl | -0.756515 | -4.256818 | -0.573978 |
| C  | 4.421278  | -0.458722 | 2.240323  |
| H  | 5.427023  | -0.068251 | 2.043127  |
| H  | 4.084848  | -0.063661 | 3.204873  |
| H  | 4.476871  | -1.546422 | 2.322462  |
| C  | 3.208557  | 1.484053  | 1.206981  |
| H  | 2.761298  | 1.730865  | 2.175688  |
| H  | 4.140887  | 2.049818  | 1.103851  |
| H  | 2.516902  | 1.804487  | 0.422483  |
| C  | 4.526194  | -1.895385 | -0.305733 |
| H  | 4.558645  | -2.272695 | -1.332563 |
| H  | 5.552465  | -1.814845 | 0.069538  |
| H  | 3.983551  | -2.625665 | 0.302473  |
| C  | 4.577618  | 0.466848  | -1.162487 |
| H  | 5.539998  | 0.721381  | -0.702447 |
| H  | 4.775005  | 0.028932  | -2.146680 |
| H  | 4.006041  | 1.386812  | -1.309566 |

Electronic Energy = -2106.30303380 (Hartree/Particle)

Dipole Moment (Debye): 11.4790

index 1

Number of imaginary frequencies= 1

Negatives Eigenvalues: -279.645

THERMOCHEMICAL DATA

Temperature 298.150 Kelvin. Pressure 1.00000 Atm.  
 Zero-point correction= 0.448004  
 (Hartree/Particle)  
 Thermal correction to Energy= 0.479707  
 Thermal correction to Enthalpy= 0.480651  
 Thermal correction to Gibbs Free Energy= 0.381979  
 Sum of electronic and zero-point Energies= -2105.855030  
 Sum of electronic and thermal Energies= -2105.823327  
 Sum of electronic and thermal Enthalpies= -2105.822383  
 Sum of electronic and thermal Free Energies= -2105.921054  
 PCM-SP (solvent=THF;6-311+g(2d,p)) = -2106.70700049  
 Corrected Free Energy = -2106.32502069

---

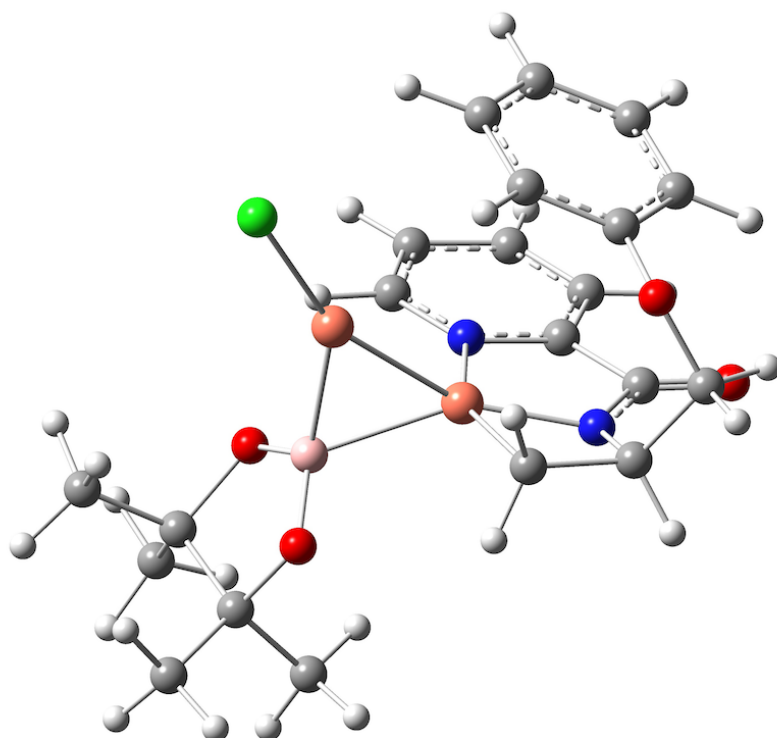

I2 Substrate: 1c  
 Path: anti-Markovnikov

#### CARTESIAN COORDINATES

|    |           |           |           |
|----|-----------|-----------|-----------|
| C  | -0.283339 | -0.873174 | 2.354926  |
| N  | -1.396000 | 0.898409  | 1.698411  |
| C  | -2.231250 | 1.811555  | 1.175858  |
| O  | -3.250876 | 2.286255  | 1.683143  |
| C  | -1.507183 | -0.047942 | 2.793760  |
| C  | -1.760038 | 2.208110  | -0.217429 |
| C  | -2.411621 | 3.180882  | -0.966555 |
| C  | -1.956610 | 3.443826  | -2.260614 |
| C  | -0.867303 | 2.726886  | -2.761813 |
| C  | -0.258153 | 1.770567  | -1.948485 |
| N  | -0.700879 | 1.527112  | -0.708070 |
| Cu | 0.776041  | -1.696960 | -0.578191 |

|    |           |           |           |
|----|-----------|-----------|-----------|
| H  | -3.261154 | 3.691718  | -0.525185 |
| H  | -2.448636 | 4.194512  | -2.873100 |
| H  | 0.602034  | 1.190994  | -2.264664 |
| H  | -0.489295 | 2.899543  | -3.764370 |
| H  | -1.379483 | 0.436734  | 3.773751  |
| H  | 0.655213  | -0.694154 | 2.876973  |
| Cu | -0.098904 | 0.134248  | 0.630504  |
| B  | 1.966812  | -0.218746 | 0.131727  |
| O  | 2.506183  | 0.635197  | -0.809763 |
| O  | 2.808401  | -0.428521 | 1.199036  |
| C  | 3.928362  | 0.790766  | -0.486892 |
| C  | 3.943525  | 0.485868  | 1.053915  |
| H  | -0.460189 | -1.915965 | 2.097661  |
| C  | -2.827646 | -0.837854 | 2.839763  |
| H  | -2.865246 | -1.415004 | 3.768373  |
| H  | -3.669326 | -0.137162 | 2.829079  |
| O  | -2.940000 | -1.825212 | 1.809180  |
| C  | -3.120957 | -1.430968 | 0.499478  |
| C  | -2.367964 | -2.114352 | -0.463444 |
| C  | -4.027792 | -0.439717 | 0.109253  |
| C  | -2.481784 | -1.773026 | -1.813943 |
| H  | -1.697077 | -2.908552 | -0.150879 |
| C  | -4.130517 | -0.102725 | -1.243795 |
| H  | -4.618551 | 0.092789  | 0.845926  |
| C  | -3.356627 | -0.756083 | -2.209356 |
| H  | -1.863337 | -2.298608 | -2.535829 |
| H  | -4.822169 | 0.682585  | -1.538842 |
| H  | -3.440714 | -0.480680 | -3.257179 |
| Cl | 0.822977  | -3.480758 | -1.755720 |
| C  | 3.619879  | 1.709924  | 1.918964  |
| H  | 3.449143  | 1.381485  | 2.949084  |
| H  | 4.444144  | 2.431235  | 1.917379  |
| H  | 2.712530  | 2.212884  | 1.568257  |
| C  | 5.199650  | -0.214329 | 1.559610  |
| H  | 6.083736  | 0.409632  | 1.382008  |
| H  | 5.115979  | -0.390856 | 2.636889  |
| H  | 5.345786  | -1.179342 | 1.069496  |
| C  | 4.359062  | 2.201954  | -0.870712 |
| H  | 5.393449  | 2.384933  | -0.556339 |
| H  | 4.307726  | 2.320551  | -1.958039 |
| H  | 3.715532  | 2.958640  | -0.415610 |
| C  | 4.678354  | -0.252497 | -1.322517 |
| H  | 4.453264  | -0.088463 | -2.380878 |
| H  | 5.761442  | -0.172184 | -1.180482 |
| H  | 4.361771  | -1.268427 | -1.066974 |

Electronic Energy = -2106.32252478 (Hartree/Particle)

Dipole Moment (Debye): 8.6048

index 0

Harmonic frequencies

Number of imaginary frequencies= 0

#### THERMOCHEMICAL DATA

Temperature 298.150 Kelvin. Pressure 1.00000 Atm.

Zero-point correction= 0.449823

(Hartree/Particle)

Thermal correction to Energy= 0.481425

Thermal correction to Enthalpy= 0.482369

Thermal correction to Gibbs Free Energy= 0.384450

```

Sum of electronic and zero-point Energies=          -2105.872702
Sum of electronic and thermal Energies=          -2105.841100
Sum of electronic and thermal Enthalpies=          -2105.840155
Sum of electronic and thermal Free Energies=        -2105.938075
PCM-SP (solvent=THF;6-311+g(2d,p)) =  -2106.72339381
Corrected Free Energy =  -2106.33894402

```

---

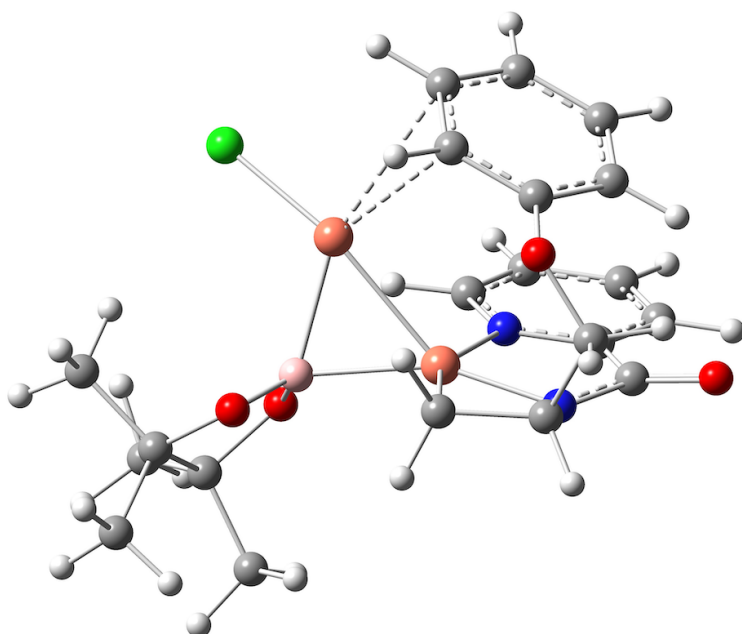

TS4a      Substrate: 1c  
             Path: anti-Markovnikov

#### CARTESIAN COORDINATES

|    |           |           |           |
|----|-----------|-----------|-----------|
| C  | 2.660184  | 2.131518  | -1.777140 |
| C  | 1.723007  | 2.827917  | -1.002036 |
| C  | 1.656489  | 2.613450  | 0.382520  |
| C  | 2.557616  | 1.723888  | 1.001747  |
| C  | 3.524163  | 1.066490  | 0.235847  |
| C  | 3.555349  | 1.263544  | -1.149457 |
| O  | 2.441203  | 1.611210  | 2.361643  |
| C  | 2.701716  | 0.363947  | 3.026877  |
| C  | 1.602986  | -0.693372 | 2.801663  |
| Cu | 0.216913  | -0.542848 | 0.661100  |
| B  | -1.787492 | -0.046869 | 0.272021  |
| O  | -2.692477 | 0.361046  | 1.220751  |
| C  | -4.017865 | -0.059683 | 0.753052  |
| C  | -3.665331 | -1.286609 | -0.167750 |
| O  | -2.311967 | -0.954868 | -0.623247 |
| Cu | -0.540191 | 1.442483  | -0.449974 |
| Cl | -1.619551 | 2.608662  | -1.936964 |
| C  | 0.197037  | -0.090774 | 2.595477  |
| N  | 1.647472  | -1.374862 | 1.511890  |
| C  | 2.656400  | -1.832971 | 0.757398  |
| C  | 2.207622  | -1.928965 | -0.700134 |
| C  | 2.992643  | -2.522740 | -1.681697 |
| C  | 2.536640  | -2.509905 | -3.002836 |
| C  | 1.315167  | -1.901166 | -3.301648 |
| C  | 0.580452  | -1.323334 | -2.265496 |

|   |           |           |           |
|---|-----------|-----------|-----------|
| N | 1.025849  | -1.344003 | -1.002153 |
| O | 3.810684  | -2.119061 | 1.096819  |
| H | 3.939526  | -2.965798 | -1.390546 |
| H | 3.129823  | -2.965149 | -3.791385 |
| H | -0.374882 | -0.832173 | -2.421367 |
| H | 0.932962  | -1.865423 | -4.316675 |
| H | 1.658116  | -1.401631 | 3.642687  |
| H | -0.629737 | -0.663498 | 3.015268  |
| H | 0.081009  | 0.982505  | 2.723939  |
| H | 2.721156  | 0.638211  | 4.084949  |
| H | 3.678739  | -0.047447 | 2.754758  |
| H | 0.969158  | 3.177412  | 1.008822  |
| H | 4.229472  | 0.385756  | 0.697506  |
| H | 1.040938  | 3.531570  | -1.466979 |
| H | 4.296724  | 0.727503  | -1.736690 |
| H | 2.692070  | 2.278100  | -2.852466 |
| C | -4.610891 | 1.128257  | -0.011571 |
| H | -5.625819 | 0.907390  | -0.360225 |
| H | -4.655226 | 1.991578  | 0.659885  |
| H | -3.986740 | 1.407639  | -0.865110 |
| C | -4.869887 | -0.397324 | 1.971908  |
| H | -5.048523 | 0.510603  | 2.556876  |
| H | -5.841155 | -0.799358 | 1.659524  |
| H | -4.380635 | -1.127859 | 2.620939  |
| C | -4.556030 | -1.444442 | -1.394985 |
| H | -4.233251 | -2.314661 | -1.976442 |
| H | -5.598967 | -1.601081 | -1.094516 |
| H | -4.503088 | -0.564671 | -2.039885 |
| C | -3.548296 | -2.611612 | 0.593499  |
| H | -4.528162 | -2.970198 | 0.926936  |
| H | -3.109574 | -3.364703 | -0.068953 |
| H | -2.896846 | -2.508200 | 1.467489  |

Electronic Energy = -2106.32217014 (Hartree/Particle)

Dipole Moment (Debye): 4.8578

index 0

Harmonic frequencies

Number of imaginary frequencies= 1

Negatives Eigenvalues: -14.406

#### THERMOCHEMICAL DATA

Temperature 298.150 Kelvin. Pressure 1.00000 Atm.

Zero-point correction= 0.450137

(Hartree/Particle)

Thermal correction to Energy= 0.480568

Thermal correction to Enthalpy= 0.481512

Thermal correction to Gibbs Free Energy= 0.389003

Sum of electronic and zero-point Energies= -2105.872033

Sum of electronic and thermal Energies= -2105.841602

Sum of electronic and thermal Enthalpies= -2105.840658

Sum of electronic and thermal Free Energies= -2105.933167

PCM-SP (solvent=THF;6-311+g(2d,p)) = -2106.72148533

Corrected Free Energy = -2106.33248219

-----

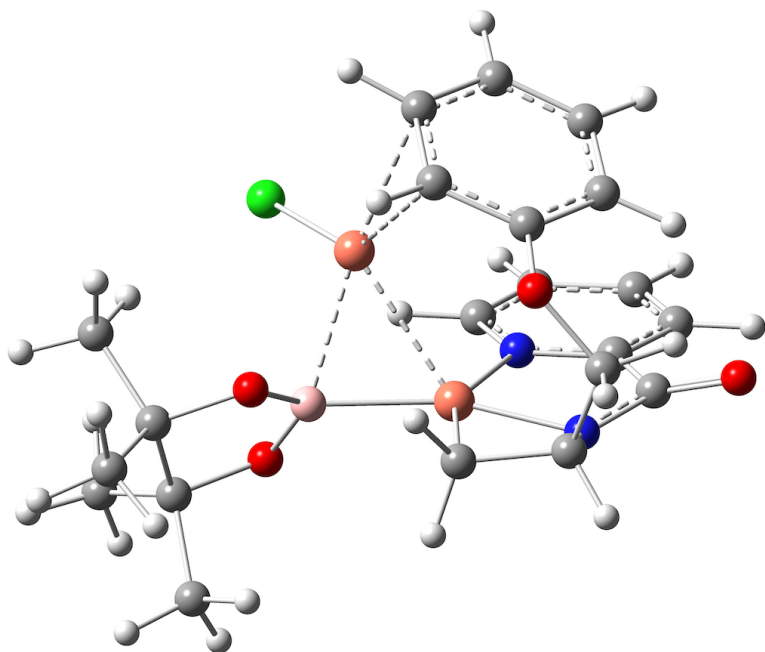

I3a          Substrate: 1c  
               Path: anti-Markovnikov

CARTESIAN COORDINATES

|    |           |           |           |
|----|-----------|-----------|-----------|
| C  | 2.159132  | 1.378848  | 2.728342  |
| C  | 0.953236  | 0.727009  | 3.047906  |
| C  | 0.739034  | -0.603004 | 2.631879  |
| C  | 1.765017  | -1.299385 | 1.943310  |
| C  | 2.968601  | -0.655902 | 1.653292  |
| C  | 3.146301  | 0.682066  | 2.035613  |
| O  | 1.488869  | -2.605038 | 1.667989  |
| C  | 2.050154  | -3.276880 | 0.524879  |
| C  | 1.353440  | -2.895621 | -0.795316 |
| Cu | 0.242587  | -0.605690 | -0.838832 |
| B  | -1.699531 | -0.236807 | -0.369641 |
| O  | -2.505148 | -0.891604 | 0.538049  |
| C  | -3.890561 | -0.484890 | 0.268614  |
| C  | -3.810342 | -0.005840 | -1.232468 |
| O  | -2.402474 | 0.373796  | -1.374995 |
| Cu | -0.416858 | 0.783836  | 1.140867  |
| Cl | -1.191633 | 2.841412  | 1.137121  |
| C  | -0.140429 | -2.545851 | -0.610157 |
| N  | 1.743211  | -1.606450 | -1.353298 |
| C  | 2.927275  | -0.992976 | -1.443394 |
| C  | 2.706824  | 0.509344  | -1.598573 |
| C  | 3.738087  | 1.370514  | -1.953727 |
| C  | 3.468715  | 2.738641  | -2.051610 |
| C  | 2.179911  | 3.200559  | -1.780642 |
| C  | 1.196006  | 2.280649  | -1.413124 |
| N  | 1.460635  | 0.968720  | -1.326818 |
| O  | 4.067009  | -1.475969 | -1.383221 |
| H  | 4.721215  | 0.949848  | -2.138505 |
| H  | 4.255573  | 3.434217  | -2.331185 |
| H  | 0.189270  | 2.583986  | -1.145914 |
| H  | 1.930208  | 4.255185  | -1.834822 |
| H  | 1.526865  | -3.723051 | -1.501555 |

|   |           |           |           |
|---|-----------|-----------|-----------|
| H | -0.775292 | -2.823435 | -1.453569 |
| H | -0.598010 | -2.758249 | 0.352202  |
| H | 1.868067  | -4.333743 | 0.736582  |
| H | 3.129114  | -3.115045 | 0.445333  |
| H | -0.142248 | -1.160620 | 2.940262  |
| H | 3.759158  | -1.169065 | 1.119029  |
| H | 0.210772  | 1.229326  | 3.661990  |
| H | 4.082185  | 1.174388  | 1.784363  |
| H | 2.305607  | 2.414157  | 3.017558  |
| C | -4.224680 | 0.634279  | 1.258488  |
| H | -5.265043 | 0.959711  | 1.149092  |
| H | -4.087741 | 0.255353  | 2.276904  |
| H | -3.562941 | 1.494336  | 1.130920  |
| C | -4.788699 | -1.695059 | 0.508323  |
| H | -4.764151 | -1.964321 | 1.569295  |
| H | -5.825656 | -1.460770 | 0.239644  |
| H | -4.465017 | -2.564446 | -0.068974 |
| C | -4.663731 | 1.215225  | -1.559011 |
| H | -4.536985 | 1.480117  | -2.613905 |
| H | -5.724982 | 1.001599  | -1.383503 |
| H | -4.369863 | 2.076369  | -0.955215 |
| C | -4.055485 | -1.126195 | -2.249384 |
| H | -5.103471 | -1.445127 | -2.251318 |
| H | -3.801794 | -0.758739 | -3.248768 |
| H | -3.425354 | -1.996723 | -2.039035 |

Electronic Energy = -2106.32353478 (Hartree/Particle)

Dipole Moment (Debye): 1.8400

index 0

Harmonic frequencies

Number of imaginary frequencies= 0

#### THERMOCHEMICAL DATA

Temperature 298.150 Kelvin. Pressure 1.00000 Atm.

Zero-point correction= 0.450115

(Hartree/Particle)

Thermal correction to Energy= 0.481459

Thermal correction to Enthalpy= 0.482404

Thermal correction to Gibbs Free Energy= 0.386793

Sum of electronic and zero-point Energies= -2105.873420

Sum of electronic and thermal Energies= -2105.842075

Sum of electronic and thermal Enthalpies= -2105.841131

Sum of electronic and thermal Free Energies= -2105.936742

PCM-SP (solvent=THF;6-311+g(2d,p)) = -2106.72173924

Corrected Free Energy = -2106.33494643

-----

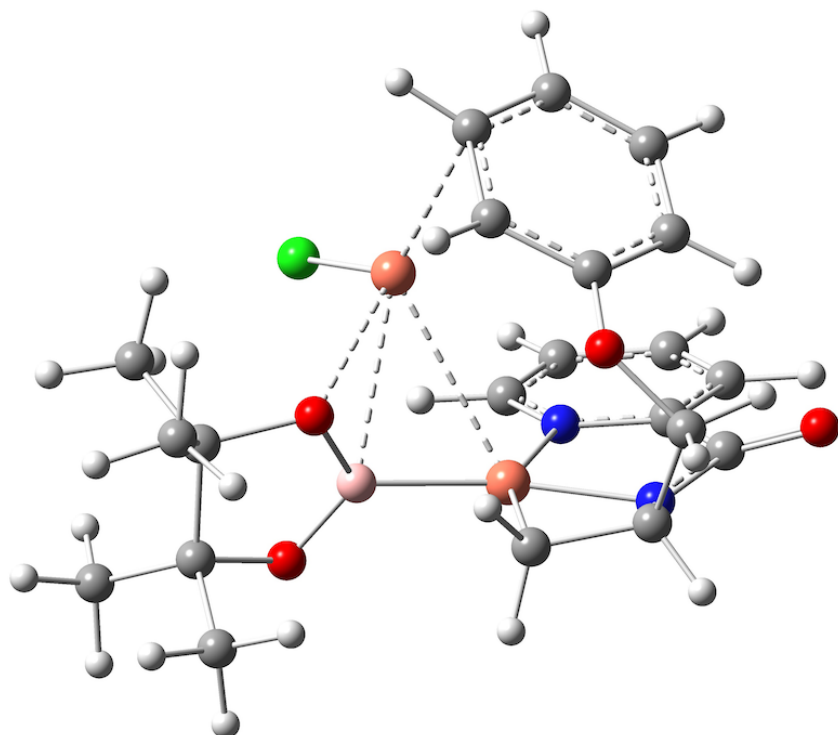

TS4b      Substrate: 1c  
Path: anti-Markovnikov

#### CARTESIAN COORDINATES

|    |           |           |           |
|----|-----------|-----------|-----------|
| C  | -1.974853 | -1.635708 | 2.888312  |
| C  | -0.654161 | -1.179125 | 3.077791  |
| C  | -0.295134 | 0.136154  | 2.698227  |
| C  | -1.288613 | 1.009766  | 2.173894  |
| C  | -2.593421 | 0.549897  | 1.993873  |
| C  | -2.918660 | -0.770095 | 2.346047  |
| O  | -0.859899 | 2.280692  | 1.958525  |
| C  | -1.557986 | 3.205639  | 1.104072  |
| C  | -1.173619 | 3.039641  | -0.376918 |
| Cu | -0.255169 | 0.771107  | -1.036235 |
| B  | 1.643732  | 0.335200  | -0.726511 |
| O  | 2.232533  | 0.324009  | 0.528693  |
| C  | 3.669639  | 0.039738  | 0.360731  |
| C  | 3.893832  | 0.378603  | -1.163703 |
| O  | 2.553772  | 0.219678  | -1.737527 |
| Cu | 0.410445  | -1.205092 | 1.112692  |
| Cl | 0.813709  | -3.112659 | 0.130510  |
| C  | 0.306489  | 2.616331  | -0.564946 |
| N  | -1.768220 | 1.892287  | -1.043154 |
| C  | -2.988665 | 1.360848  | -1.017845 |
| C  | -2.900095 | -0.089403 | -1.491126 |
| C  | -4.037393 | -0.827835 | -1.794905 |
| C  | -3.889921 | -2.152319 | -2.216853 |
| C  | -2.608985 | -2.695856 | -2.311761 |
| C  | -1.511818 | -1.902121 | -1.970227 |
| N  | -1.657029 | -0.632202 | -1.567159 |
| O  | -4.066783 | 1.856549  | -0.652186 |
| H  | -5.004970 | -0.347362 | -1.692126 |
| H  | -4.762802 | -2.750389 | -2.465188 |
| H  | -0.500378 | -2.288363 | -1.976912 |

|   |           |           |           |
|---|-----------|-----------|-----------|
| H | -2.447168 | -3.721694 | -2.626266 |
| H | -1.417925 | 3.990664  | -0.878139 |
| H | 0.773386  | 3.028502  | -1.461826 |
| H | 0.946915  | 2.686791  | 0.311557  |
| H | -1.222419 | 4.184781  | 1.457196  |
| H | -2.642402 | 3.138728  | 1.228316  |
| H | 0.667728  | 0.564437  | 2.966227  |
| H | -3.361745 | 1.192399  | 1.582261  |
| H | 0.061978  | -1.801874 | 3.609540  |
| H | -3.939274 | -1.109748 | 2.190531  |
| H | -2.239456 | -2.652204 | 3.159700  |
| C | 3.891615  | -1.431635 | 0.708301  |
| H | 4.956153  | -1.686219 | 0.662406  |
| H | 3.535823  | -1.615114 | 1.727609  |
| H | 3.328987  | -2.094881 | 0.049675  |
| C | 4.426955  | 0.935100  | 1.337762  |
| H | 4.190121  | 0.636982  | 2.364477  |
| H | 5.508888  | 0.829999  | 1.194784  |
| H | 4.158232  | 1.987559  | 1.220440  |
| C | 4.841108  | -0.565594 | -1.896467 |
| H | 4.915913  | -0.265576 | -2.946742 |
| H | 5.844042  | -0.524396 | -1.455090 |
| H | 4.483432  | -1.596732 | -1.862668 |
| C | 4.290032  | 1.838137  | -1.416524 |
| H | 5.302660  | 2.048645  | -1.055898 |
| H | 4.256737  | 2.032124  | -2.493201 |
| H | 3.594477  | 2.528694  | -0.928278 |

Electronic Energy = -2106.32190725 (Hartree/Particle)

Dipole Moment (Debye): 2.5374

index 0

Harmonic frequencies

Number of imaginary frequencies= 1

Negatives Eigenvalues: -36.673

#### THERMOCHEMICAL DATA

Temperature 298.150 Kelvin. Pressure 1.00000 Atm.

Zero-point correction= 0.450034

(Hartree/Particle)

Thermal correction to Energy= 0.480564

Thermal correction to Enthalpy= 0.481508

Thermal correction to Gibbs Free Energy= 0.387797

Sum of electronic and zero-point Energies= -2105.871874

Sum of electronic and thermal Energies= -2105.841344

Sum of electronic and thermal Enthalpies= -2105.840399

Sum of electronic and thermal Free Energies= -2105.934110

PCM-SP (solvent=THF;6-311+g(2d,p)) = -2106.72076964

Corrected Free Energy = -2106.33297239

-----

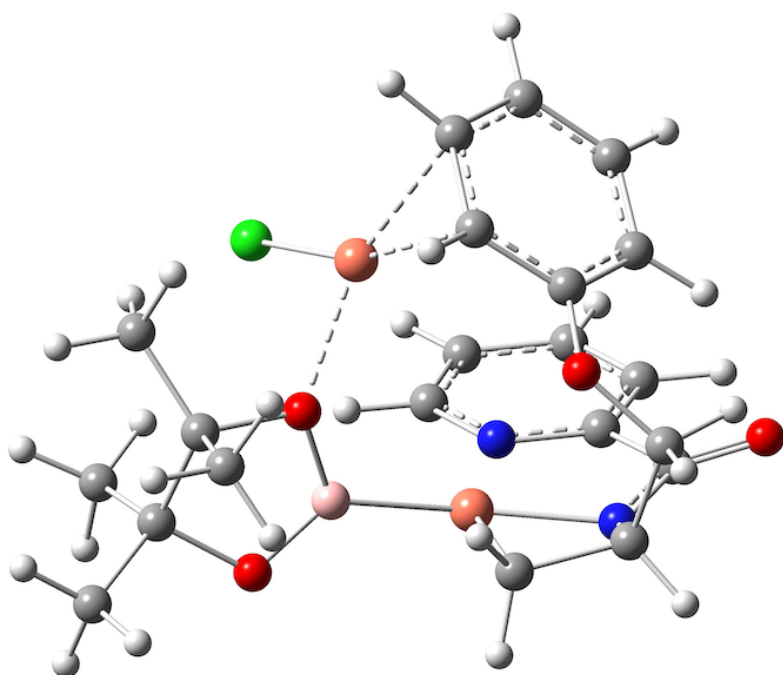

I3b          Substrate: 1c  
 Path: anti-Markovnikov

# CARTESIAN COORDINATES

|    |           |           |           |
|----|-----------|-----------|-----------|
| C  | 1.754428  | 2.540452  | 2.416257  |
| C  | 0.489977  | 2.008294  | 2.754929  |
| C  | 0.259486  | 0.613870  | 2.669706  |
| C  | 1.321433  | -0.252122 | 2.275870  |
| C  | 2.564270  | 0.285030  | 1.944938  |
| C  | 2.763648  | 1.676104  | 2.014787  |
| O  | 1.005827  | -1.572582 | 2.323559  |
| C  | 1.885195  | -2.620910 | 1.872592  |
| C  | 1.579296  | -3.058589 | 0.428387  |
| Cu | 0.356585  | -1.344391 | -0.942199 |
| B  | -1.539943 | -0.954695 | -0.704466 |
| O  | -1.946179 | -0.235116 | 0.413975  |
| C  | -3.421785 | -0.295710 | 0.471656  |
| C  | -3.782832 | -0.600131 | -1.024766 |
| O  | -2.589106 | -1.320377 | -1.495054 |
| Cu | -0.616164 | 1.538132  | 0.912203  |
| Cl | -1.145271 | 3.028486  | -0.603153 |
| C  | 0.062960  | -2.992337 | 0.101135  |
| N  | 2.028692  | -2.128220 | -0.601764 |
| C  | 3.123952  | -1.376596 | -0.713839 |
| C  | 2.797856  | -0.137759 | -1.551828 |
| C  | 3.788454  | 0.729373  | -1.995419 |
| C  | 3.415114  | 1.887237  | -2.684867 |
| C  | 2.061487  | 2.147255  | -2.896521 |
| C  | 1.118418  | 1.236940  | -2.416322 |
| N  | 1.480564  | 0.122249  | -1.766047 |
| O  | 4.248187  | -1.526844 | -0.208919 |
| H  | 4.822551  | 0.483596  | -1.776785 |
| H  | 4.171290  | 2.582108  | -3.040530 |
| H  | 0.054803  | 1.413653  | -2.514224 |
| H  | 1.724215  | 3.046480  | -3.400954 |
| H  | 2.005224  | -4.067867 | 0.306205  |

|   |           |           |           |
|---|-----------|-----------|-----------|
| H | -0.269346 | -3.751690 | -0.609561 |
| H | -0.610145 | -2.899093 | 0.951842  |
| H | 1.670097  | -3.453602 | 2.549243  |
| H | 2.937506  | -2.344759 | 1.977364  |
| H | -0.635170 | 0.158638  | 3.087742  |
| H | 3.386393  | -0.347493 | 1.635982  |
| H | -0.262791 | 2.652556  | 3.205114  |
| H | 3.740686  | 2.069915  | 1.747454  |
| H | 1.921271  | 3.611150  | 2.468514  |
| C | -3.944020 | 1.030868  | 1.007871  |
| H | -5.039537 | 1.050566  | 0.969353  |
| H | -3.640384 | 1.150689  | 2.054250  |
| H | -3.547612 | 1.876718  | 0.443023  |
| C | -3.751252 | -1.443122 | 1.430838  |
| H | -3.284420 | -1.242290 | 2.400582  |
| H | -4.832180 | -1.537971 | 1.579814  |
| H | -3.364226 | -2.397182 | 1.058587  |
| C | -3.903395 | 0.660949  | -1.884760 |
| H | -3.941013 | 0.365606  | -2.938342 |
| H | -4.818994 | 1.213769  | -1.647091 |
| H | -3.049019 | 1.328602  | -1.738178 |
| C | -4.992209 | -1.508205 | -1.218231 |
| H | -5.890609 | -1.043107 | -0.795113 |
| H | -5.162046 | -1.668184 | -2.287731 |
| H | -4.846960 | -2.484267 | -0.749007 |

Electronic Energy = -2106.32816499 (Hartree/Particle)

Dipole Moment (Debye): 2.6979

index 0

Harmonic frequencies

Number of imaginary frequencies= 0

#### THERMOCHEMICAL DATA

Temperature 298.150 Kelvin. Pressure 1.00000 Atm.

Zero-point correction= 0.450490

(Hartree/Particle)

Thermal correction to Energy= 0.481544

Thermal correction to Enthalpy= 0.482488

Thermal correction to Gibbs Free Energy= 0.388415

Sum of electronic and zero-point Energies= -2105.877675

Sum of electronic and thermal Energies= -2105.846621

Sum of electronic and thermal Enthalpies= -2105.845677

Sum of electronic and thermal Free Energies= -2105.939750

PCM-SP (solvent=THF;6-311+g(2d,p)) = -2106.72721471

Corrected Free Energy = -2106.33879995

-----

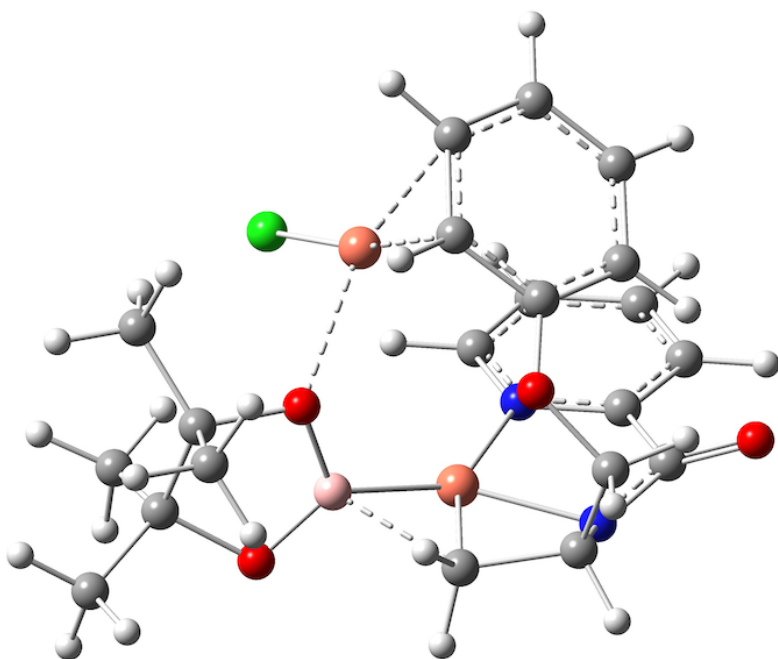

TS5      Substrate: 1c  
 Path: anti-Markovnikov

# CARTESIAN COORDINATES

|    |           |           |           |
|----|-----------|-----------|-----------|
| C  | 1.827383  | 2.705139  | 2.263997  |
| C  | 0.464807  | 2.420218  | 2.492870  |
| C  | 0.011318  | 1.079558  | 2.513008  |
| C  | 0.942024  | 0.017735  | 2.317520  |
| C  | 2.289352  | 0.310892  | 2.103049  |
| C  | 2.713366  | 1.650439  | 2.076926  |
| O  | 0.394947  | -1.219992 | 2.411009  |
| C  | 1.124655  | -2.440841 | 2.174690  |
| C  | 0.927827  | -2.981615 | 0.742473  |
| Cu | 0.321747  | -1.245030 | -0.933674 |
| B  | -1.585258 | -1.072687 | -0.471139 |
| O  | -1.984959 | -0.108835 | 0.438447  |
| C  | -3.457610 | -0.038173 | 0.379985  |
| C  | -3.752363 | -0.623664 | -1.048845 |
| O  | -2.613048 | -1.527800 | -1.252520 |
| Cu | -0.494460 | 1.788107  | 0.566962  |
| Cl | -0.873969 | 2.849401  | -1.286681 |
| C  | -0.516976 | -2.686208 | 0.195337  |
| N  | 1.755564  | -2.374141 | -0.291773 |
| C  | 2.949485  | -1.803390 | -0.208164 |
| C  | 3.028158  | -0.634152 | -1.205054 |
| C  | 4.247694  | -0.065834 | -1.560709 |
| C  | 4.260945  | 1.053577  | -2.395945 |
| C  | 3.048615  | 1.589539  | -2.832745 |
| C  | 1.859885  | 0.983867  | -2.424083 |
| N  | 1.849957  | -0.103777 | -1.637278 |
| O  | 3.905775  | -2.009775 | 0.566032  |
| H  | 5.154474  | -0.508768 | -1.162170 |
| H  | 5.203189  | 1.507427  | -2.692221 |
| H  | 0.890359  | 1.389625  | -2.688413 |
| H  | 3.009747  | 2.471557  | -3.463854 |
| H  | 1.073425  | -4.073579 | 0.807091  |

|   |           |           |           |
|---|-----------|-----------|-----------|
| H | -0.828551 | -3.453147 | -0.518225 |
| H | -1.255957 | -2.610644 | 0.996913  |
| H | 0.681506  | -3.145610 | 2.884566  |
| H | 2.188266  | -2.334546 | 2.399794  |
| H | -0.986103 | 0.820868  | 2.859124  |
| H | 3.019221  | -0.473932 | 1.951586  |
| H | -0.218188 | 3.221634  | 2.765748  |
| H | 3.766956  | 1.851933  | 1.902124  |
| H | 2.169232  | 3.734619  | 2.238697  |
| C | -3.882213 | 1.410382  | 0.583758  |
| H | -4.965470 | 1.510905  | 0.448438  |
| H | -3.638249 | 1.726748  | 1.604376  |
| H | -3.369422 | 2.079720  | -0.109707 |
| C | -3.964429 | -0.923327 | 1.522601  |
| H | -3.543206 | -0.563798 | 2.466882  |
| H | -5.056742 | -0.890290 | 1.594931  |
| H | -3.658259 | -1.965998 | 1.388898  |
| C | -3.688490 | 0.428348  | -2.159146 |
| H | -3.693077 | -0.082454 | -3.127483 |
| H | -4.554255 | 1.098294  | -2.116711 |
| H | -2.779579 | 1.032507  | -2.087575 |
| C | -5.033696 | -1.444133 | -1.150788 |
| H | -5.904262 | -0.822399 | -0.910405 |
| H | -5.150813 | -1.813950 | -2.174374 |
| H | -5.020597 | -2.305849 | -0.478920 |

Electronic Energy = -2106.32405558 (Hartree/Particle)

Dipole Moment (Debye): 3.1867

index 0

Harmonic frequencies

Number of imaginary frequencies= 1

Negatives Eigenvalues: -115.830

#### THERMOCHEMICAL DATA

Temperature 298.150 Kelvin. Pressure 1.00000 Atm.

Zero-point correction= 0.449998

(Hartree/Particle)

Thermal correction to Energy= 0.480427

Thermal correction to Enthalpy= 0.481371

Thermal correction to Gibbs Free Energy= 0.389242

Sum of electronic and zero-point Energies= -2105.874058

Sum of electronic and thermal Energies= -2105.843629

Sum of electronic and thermal Enthalpies= -2105.842685

Sum of electronic and thermal Free Energies= -2105.934814

PCM-SP (solvent=THF;6-311+g(2d,p)) = -2106.72383744

Corrected Free Energy = -2106.33459586

-----

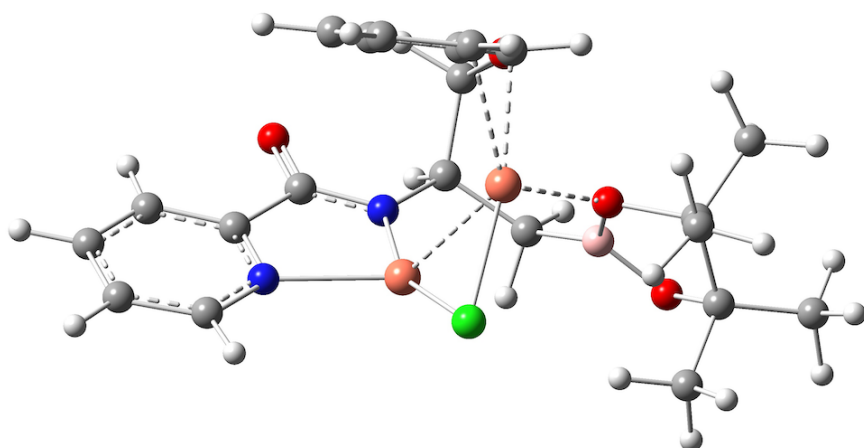

P2            Substrate: 1c  
               Path: anti-Markovnikov

# CARTESIAN COORDINATES

|    |           |           |           |
|----|-----------|-----------|-----------|
| C  | 1.483707  | 3.382353  | -1.148678 |
| C  | 0.086295  | 3.321469  | -1.072899 |
| C  | -0.547765 | 2.732736  | 0.047943  |
| C  | 0.242956  | 2.171721  | 1.091331  |
| C  | 1.642399  | 2.255121  | 1.011962  |
| C  | 2.241094  | 2.862351  | -0.094962 |
| O  | -0.457786 | 1.624229  | 2.106575  |
| C  | 0.160079  | 0.678326  | 3.006171  |
| C  | 0.293310  | -0.752204 | 2.450505  |
| Cu | 0.829147  | -1.040192 | -0.576212 |
| B  | -2.154864 | -1.000968 | 1.149092  |
| O  | -2.247122 | 0.107197  | 0.312047  |
| C  | -3.642163 | 0.190348  | -0.153850 |
| C  | -4.095409 | -1.303924 | -0.047703 |
| O  | -3.286501 | -1.779233 | 1.063118  |
| Cu | -0.599910 | 0.950224  | -1.058064 |
| Cl | -0.242868 | -0.723498 | -2.525857 |
| C  | -1.045360 | -1.454650 | 2.171870  |
| N  | 1.211877  | -0.872004 | 1.315155  |
| C  | 2.513125  | -0.777159 | 1.630550  |
| C  | 3.484473  | -0.961462 | 0.474920  |
| C  | 4.861855  | -0.870677 | 0.698019  |
| C  | 5.729625  | -1.023020 | -0.383858 |
| C  | 5.198662  | -1.254038 | -1.656265 |
| C  | 3.811162  | -1.326170 | -1.791461 |
| N  | 2.979335  | -1.188514 | -0.751906 |
| O  | 2.992745  | -0.523103 | 2.759702  |
| H  | 5.211395  | -0.683380 | 1.707251  |
| H  | 6.805176  | -0.960543 | -0.238656 |
| H  | 3.338815  | -1.496662 | -2.756095 |
| H  | 5.839223  | -1.375348 | -2.524844 |
| H  | 0.754060  | -1.284440 | 3.298776  |
| H  | -0.810631 | -2.494136 | 1.899992  |
| H  | -1.586432 | -1.546714 | 3.128850  |
| H  | -0.512788 | 0.667773  | 3.868644  |
| H  | 1.137525  | 1.036607  | 3.336277  |
| H  | -1.615603 | 2.845956  | 0.218558  |
| H  | 2.264456  | 1.827621  | 1.788771  |
| H  | -0.527060 | 3.773047  | -1.847650 |

|   |           |           |           |
|---|-----------|-----------|-----------|
| H | 3.326295  | 2.906001  | -0.137821 |
| H | 1.966554  | 3.825331  | -2.013817 |
| C | -3.671689 | 0.771002  | -1.562967 |
| H | -4.696547 | 0.759266  | -1.951610 |
| H | -3.332130 | 1.813267  | -1.547560 |
| H | -3.031360 | 0.211848  | -2.248011 |
| C | -4.364049 | 1.121465  | 0.826001  |
| H | -3.852114 | 2.088597  | 0.847467  |
| H | -5.403584 | 1.286128  | 0.523322  |
| H | -4.354904 | 0.713783  | 1.841580  |
| C | -3.706986 | -2.137233 | -1.274938 |
| H | -3.847852 | -3.196509 | -1.037752 |
| H | -4.332429 | -1.889932 | -2.139843 |
| H | -2.658429 | -1.981342 | -1.547046 |
| C | -5.568154 | -1.502121 | 0.296575  |
| H | -6.206914 | -1.059257 | -0.476944 |
| H | -5.790385 | -2.572673 | 0.351214  |
| H | -5.821305 | -1.055409 | 1.261207  |

Electronic Energy = -2106.41494402 (Hartree/Particle)

Dipole Moment (Debye): 4.5968

index 0

Harmonic frequencies

Number of imaginary frequencies= 0

#### THERMOCHEMICAL DATA

Temperature 298.150 Kelvin. Pressure 1.00000 Atm.

Zero-point correction= 0.452033

(Hartree/Particle)

Thermal correction to Energy= 0.482922

Thermal correction to Enthalpy= 0.483866

Thermal correction to Gibbs Free Energy= 0.390290

Sum of electronic and zero-point Energies= -2105.962911

Sum of electronic and thermal Energies= -2105.932022

Sum of electronic and thermal Enthalpies= -2105.931078

Sum of electronic and thermal Free Energies= -2106.024654

PCM-SP (solvent=THF;6-311+g(2d,p)) = -2106.81097231

Corrected Free Energy = -2106.42068229

-----  
PATH: MARKOVNIKOV

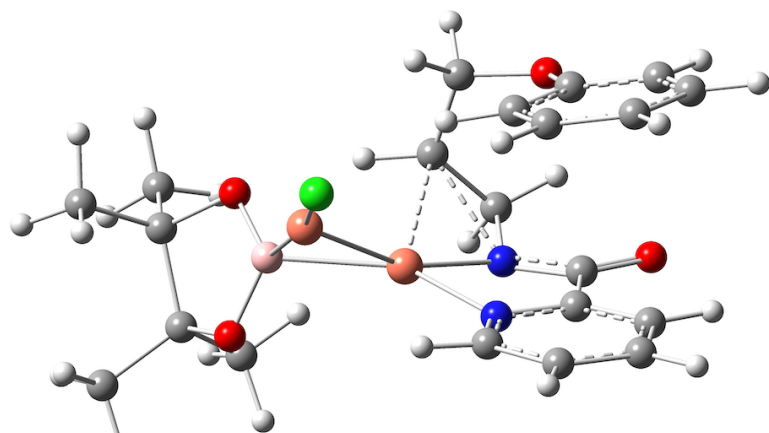

TS3 Substrate: 1c  
Path: Markovnikov

# CARTESIAN COORDINATES

|    |           |           |           |
|----|-----------|-----------|-----------|
| C  | -0.299954 | -2.133977 | -0.903735 |
| N  | 0.505324  | -2.010048 | 0.797575  |
| C  | 1.846446  | -1.927262 | 1.194917  |
| O  | 2.590148  | -2.897131 | 1.256590  |
| C  | 0.119273  | -3.189824 | 0.042762  |
| C  | 2.286174  | -0.561469 | 1.647054  |
| C  | 3.573990  | -0.358022 | 2.136036  |
| C  | 3.940959  | 0.935722  | 2.512240  |
| C  | 3.019513  | 1.973200  | 2.370023  |
| C  | 1.754605  | 1.684792  | 1.852050  |
| N  | 1.398629  | 0.440133  | 1.515330  |
| Cu | -0.853872 | 1.806031  | -0.488126 |
| H  | 4.256808  | -1.198063 | 2.192231  |
| H  | 4.939124  | 1.132201  | 2.893344  |
| H  | 1.016169  | 2.458557  | 1.667193  |
| H  | 3.271381  | 2.995202  | 2.634664  |
| H  | 0.965987  | -3.806960 | -0.261248 |
| H  | -0.678178 | -3.772059 | 0.510047  |
| Cu | -0.300795 | -0.224979 | 0.498804  |
| B  | -2.286793 | 0.418879  | 0.002206  |
| O  | -2.954982 | -0.296066 | -0.992306 |
| O  | -3.108434 | 0.615078  | 1.100267  |
| C  | -4.367932 | -0.367920 | -0.630241 |
| C  | -4.309996 | -0.193431 | 0.927324  |
| Cl | 0.328855  | 3.505234  | -1.087284 |
| H  | -1.355090 | -1.876269 | -0.970107 |
| C  | 0.506557  | -1.775499 | -2.120919 |
| H  | 0.150643  | -2.460237 | -2.909203 |
| H  | 0.280354  | -0.759938 | -2.455587 |
| O  | 1.888525  | -2.023258 | -1.984725 |
| C  | 2.763000  | -0.986923 | -1.705146 |
| C  | 2.403725  | 0.358664  | -1.595944 |
| C  | 4.094176  | -1.381518 | -1.520397 |
| C  | 3.386896  | 1.312045  | -1.307936 |
| H  | 1.381499  | 0.703522  | -1.701163 |
| C  | 5.063870  | -0.422375 | -1.235396 |
| H  | 4.340343  | -2.436381 | -1.589952 |
| C  | 4.716718  | 0.931344  | -1.128985 |
| H  | 3.076124  | 2.349204  | -1.218146 |
| H  | 6.095076  | -0.735568 | -1.091914 |
| H  | 5.475109  | 1.676415  | -0.904362 |
| C  | -4.057282 | -1.509015 | 1.676643  |
| H  | -3.822598 | -1.281918 | 2.721155  |
| H  | -4.934570 | -2.164660 | 1.649817  |
| H  | -3.202771 | -2.046141 | 1.250741  |
| C  | -5.494292 | 0.547725  | 1.539571  |
| H  | -6.428522 | 0.006103  | 1.347598  |
| H  | -5.360030 | 0.626477  | 2.623358  |
| H  | -5.585346 | 1.559218  | 1.137424  |
| C  | -5.066105 | 0.794131  | -1.347219 |
| H  | -4.884134 | 0.708211  | -2.423144 |
| H  | -6.147842 | 0.779764  | -1.174425 |
| H  | -4.668756 | 1.757835  | -1.013860 |
| C  | -4.927489 | -1.703125 | -1.111884 |
| H  | -5.964622 | -1.828874 | -0.778783 |
| H  | -4.914462 | -1.736171 | -2.206474 |
| H  | -4.339774 | -2.546510 | -0.739907 |

Electronic Energy = -2106.31037510 (Hartree/Particle)  
 Dipole Moment (Debye): 5.6783  
 index 0  
 Harmonic frequencies  
 Number of imaginary frequencies= 1  
 Negatives Eigenvalues: -222.555

#### THERMOCHEMICAL DATA

Temperature 298.150 Kelvin. Pressure 1.00000 Atm.  
 Zero-point correction= 0.448491  
 (Hartree/Particle)  
 Thermal correction to Energy= 0.480080  
 Thermal correction to Enthalpy= 0.481024  
 Thermal correction to Gibbs Free Energy= 0.383276  
 Sum of electronic and zero-point Energies= -2105.861884  
 Sum of electronic and thermal Energies= -2105.830295  
 Sum of electronic and thermal Enthalpies= -2105.829351  
 Sum of electronic and thermal Free Energies= -2105.927099  
 PCM-SP (solvent=THF;6-311+g(2d,p)) = -2106.71119542  
 Corrected Free Energy = -2106.3279193

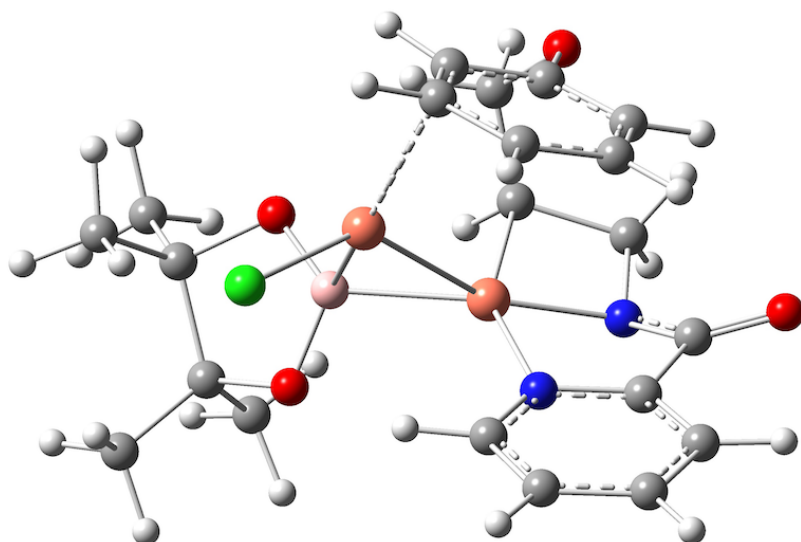

I2 Substrate: 1c  
 Path: Markovnikov

#### CARTESIAN COORDINATES

|   |           |           |           |
|---|-----------|-----------|-----------|
| C | -0.057418 | 2.570992  | 0.108653  |
| N | 1.571234  | 1.948037  | -1.305556 |
| C | 2.820716  | 1.454063  | -1.405226 |
| O | 3.894834  | 2.053311  | -1.287525 |
| C | 1.182839  | 3.157450  | -0.586313 |
| C | 2.773586  | -0.045025 | -1.677522 |
| C | 3.885741  | -0.750732 | -2.122126 |
| C | 3.772507  | -2.130266 | -2.310966 |
| C | 2.557308  | -2.760342 | -2.035000 |
| C | 1.488624  | -1.991053 | -1.571418 |
| N | 1.602749  | -0.664901 | -1.403404 |

|    |           |           |           |
|----|-----------|-----------|-----------|
| Cu | -0.359946 | -1.014285 | 0.968246  |
| H  | 4.808386  | -0.208028 | -2.297597 |
| H  | 4.623906  | -2.705900 | -2.662962 |
| H  | 0.533115  | -2.429834 | -1.300477 |
| H  | 2.432438  | -3.831190 | -2.159423 |
| H  | 1.952722  | 3.485566  | 0.120944  |
| H  | 0.948792  | 3.988366  | -1.264598 |
| Cu | 0.318941  | 0.730882  | -0.612939 |
| B  | -1.638840 | 0.122467  | -0.245235 |
| O  | -2.562874 | 0.710847  | 0.595742  |
| O  | -2.197208 | -0.367266 | -1.398998 |
| C  | -3.891275 | 0.313646  | 0.112551  |
| C  | -3.609916 | 0.012528  | -1.407845 |
| Cl | -1.088680 | -3.084695 | 0.905591  |
| H  | -1.013835 | 2.855380  | -0.333353 |
| C  | -0.126923 | 2.635171  | 1.619910  |
| H  | -0.333626 | 3.670328  | 1.922057  |
| H  | -0.935588 | 2.000568  | 1.993088  |
| O  | 1.126199  | 2.340094  | 2.265144  |
| C  | 1.539717  | 1.032027  | 2.277203  |
| C  | 2.803608  | 0.737344  | 1.766100  |
| C  | 0.735607  | 0.006662  | 2.821969  |
| C  | 3.263253  | -0.585393 | 1.769994  |
| H  | 3.401169  | 1.536872  | 1.340628  |
| C  | 1.217176  | -1.317127 | 2.833636  |
| H  | -0.198766 | 0.258648  | 3.317955  |
| C  | 2.477280  | -1.615025 | 2.288688  |
| H  | 4.236440  | -0.804321 | 1.339847  |
| H  | 0.617278  | -2.101071 | 3.284962  |
| H  | 2.825163  | -2.643263 | 2.269858  |
| C  | -3.720580 | 1.246901  | -2.310310 |
| H  | -3.327770 | 0.998937  | -3.301743 |
| H  | -4.761606 | 1.569188  | -2.419635 |
| H  | -3.134558 | 2.083363  | -1.914327 |
| C  | -4.410704 | -1.150007 | -1.984621 |
| H  | -5.485486 | -0.942072 | -1.921312 |
| H  | -4.148451 | -1.291523 | -3.038217 |
| H  | -4.197498 | -2.081012 | -1.454904 |
| C  | -4.859730 | 1.463844  | 0.366357  |
| H  | -5.835990 | 1.239652  | -0.079251 |
| H  | -5.001517 | 1.602082  | 1.443413  |
| H  | -4.491940 | 2.404210  | -0.051025 |
| C  | -4.297427 | -0.922388 | 0.921121  |
| H  | -4.309126 | -0.657632 | 1.983876  |
| H  | -5.298171 | -1.268577 | 0.641358  |
| H  | -3.584009 | -1.740022 | 0.786862  |

Electronic Energy = -2106.32541596 (Hartree/Particle)

Dipole Moment (Debye): 2.1292

index 0

Harmonic frequencies

Number of imaginary frequencies= 0

#### THERMOCHEMICAL DATA

Temperature 298.150 Kelvin. Pressure 1.00000 Atm.

Zero-point correction= 0.450402

(Hartree/Particle)

Thermal correction to Energy= 0.481773

Thermal correction to Enthalpy= 0.482717

Thermal correction to Gibbs Free Energy= 0.387207  
 Sum of electronic and zero-point Energies= -2105.875014  
 Sum of electronic and thermal Energies= -2105.843643  
 Sum of electronic and thermal Enthalpies= -2105.842699  
 Sum of electronic and thermal Free Energies= -2105.938209  
 PCM-SP (solvent=THF;6-311+g(2d,p)) = -2106.72471889  
 Corrected Free Energy = -2106.33751193

---

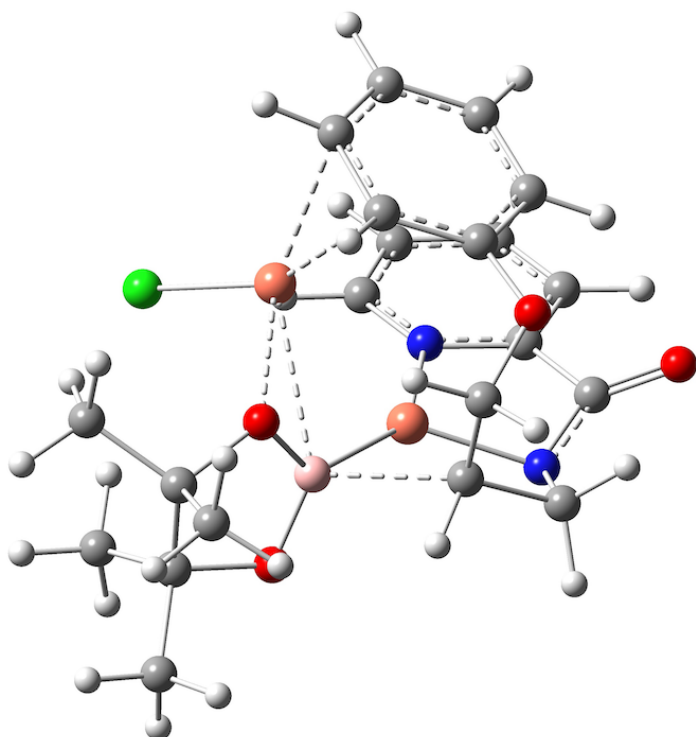

TS4=TS5      Substrate: 1c  
 Path: Markovnikov

#### CARTESIAN COORDINATES

|    |           |           |           |
|----|-----------|-----------|-----------|
| C  | -0.489118 | 2.369361  | 0.359369  |
| N  | 1.484755  | 2.314936  | -1.004360 |
| C  | 2.752835  | 1.988157  | -0.748233 |
| O  | 3.649341  | 2.600000  | -0.141840 |
| C  | 0.691116  | 3.241829  | -0.214445 |
| C  | 3.027961  | 0.571130  | -1.270638 |
| C  | 4.315673  | 0.141887  | -1.580054 |
| C  | 4.508268  | -1.172390 | -2.009566 |
| C  | 3.407150  | -2.027129 | -2.095285 |
| C  | 2.148229  | -1.541479 | -1.740944 |
| N  | 1.965666  | -0.273000 | -1.340373 |
| Cu | -0.378771 | -1.434918 | 0.626164  |
| H  | 5.132527  | 0.847587  | -1.470317 |
| H  | 5.502663  | -1.526051 | -2.270020 |
| H  | 1.263170  | -2.169534 | -1.749382 |
| H  | 3.511073  | -3.058471 | -2.417449 |
| H  | 1.258439  | 3.697927  | 0.608589  |
| H  | 0.286074  | 4.040688  | -0.846966 |
| Cu | 0.320256  | 0.792853  | -0.704347 |
| B  | -1.622878 | 0.746999  | -0.340274 |

|    |           |           |           |
|----|-----------|-----------|-----------|
| O  | -2.289373 | 0.115562  | 0.687472  |
| O  | -2.418016 | 1.041838  | -1.409794 |
| C  | -3.713757 | 0.020914  | 0.314745  |
| C  | -3.693660 | 0.331938  | -1.239394 |
| Cl | -0.928354 | -3.044566 | -0.739170 |
| H  | -1.452883 | 2.830369  | 0.119779  |
| C  | -0.416264 | 2.205897  | 1.878280  |
| H  | -0.535966 | 3.197480  | 2.329153  |
| H  | -1.212954 | 1.561229  | 2.255836  |
| O  | 0.871516  | 1.777137  | 2.339867  |
| C  | 1.217768  | 0.459166  | 2.270308  |
| C  | 2.557506  | 0.177824  | 2.002885  |
| C  | 0.302588  | -0.596180 | 2.527433  |
| C  | 3.001739  | -1.149939 | 1.986120  |
| H  | 3.227823  | 1.004174  | 1.787364  |
| C  | 0.778672  | -1.932399 | 2.524639  |
| H  | -0.688843 | -0.373252 | 2.912080  |
| C  | 2.128611  | -2.206330 | 2.239475  |
| H  | 4.045298  | -1.350957 | 1.759457  |
| H  | 0.118699  | -2.736595 | 2.841133  |
| H  | 2.477655  | -3.233731 | 2.222237  |
| C  | -4.806231 | 1.263267  | -1.714662 |
| H  | -4.689760 | 1.446717  | -2.787206 |
| H  | -5.787136 | 0.801662  | -1.551690 |
| H  | -4.782834 | 2.228472  | -1.203030 |
| C  | -3.628404 | -0.912986 | -2.125571 |
| H  | -4.567117 | -1.475988 | -2.081941 |
| H  | -3.463257 | -0.596675 | -3.160530 |
| H  | -2.808201 | -1.573212 | -1.835801 |
| C  | -4.424448 | 1.085826  | 1.153778  |
| H  | -5.503614 | 1.084385  | 0.968628  |
| H  | -4.256907 | 0.875409  | 2.215073  |
| H  | -4.037895 | 2.087964  | 0.940556  |
| C  | -4.192653 | -1.378458 | 0.682042  |
| H  | -4.156081 | -1.504800 | 1.769580  |
| H  | -5.228655 | -1.526826 | 0.356552  |
| H  | -3.560143 | -2.144723 | 0.228670  |

Electronic Energy = -2106.31540616 (Hartree/Particle)

Dipole Moment (Debye): 4.4348

index 0

Harmonic frequencies

Number of imaginary frequencies= 1

Negatives Eigenvalues: -148.079

#### THERMOCHEMICAL DATA

Temperature 298.150 Kelvin. Pressure 1.00000 Atm.

Zero-point correction= 0.449959

(Hartree/Particle)

Thermal correction to Energy= 0.480696

Thermal correction to Enthalpy= 0.481640

Thermal correction to Gibbs Free Energy= 0.388353

Sum of electronic and zero-point Energies= -2105.865447

Sum of electronic and thermal Energies= -2105.834710

Sum of electronic and thermal Enthalpies= -2105.833766

Sum of electronic and thermal Free Energies= -2105.927053

PCM-SP (solvent=THF;6-311+g(2d,p)) = -2106.71773050

Corrected Free Energy = -2106.32937735

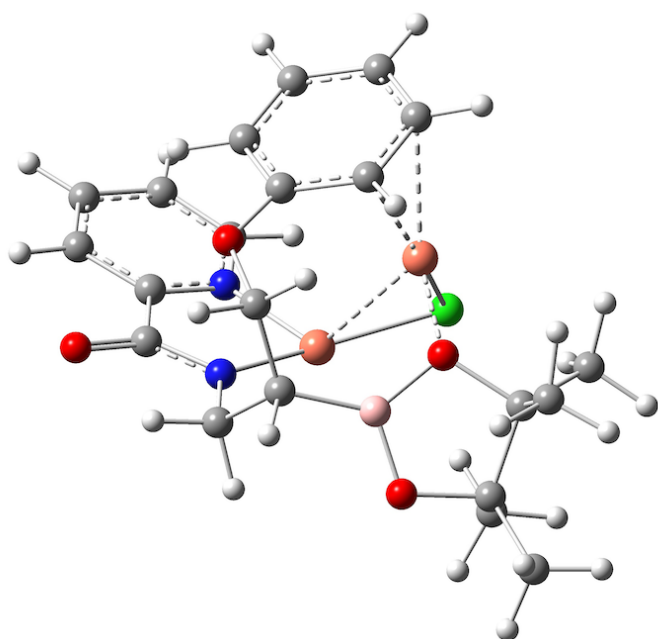

P2            Substrate: 1c  
               Path: Markovnikov

#### CARTESIAN COORDINATES

|    |           |           |           |
|----|-----------|-----------|-----------|
| C  | 1.072742  | -1.770882 | 1.701063  |
| N  | -0.940251 | -1.857041 | 0.164318  |
| C  | -2.235096 | -2.099564 | 0.446090  |
| O  | -2.695818 | -2.900337 | 1.285298  |
| C  | 0.027140  | -2.629699 | 0.936395  |
| C  | -3.239210 | -1.269419 | -0.345865 |
| C  | -4.604080 | -1.359113 | -0.052577 |
| C  | -5.498297 | -0.555947 | -0.760907 |
| C  | -5.007411 | 0.312522  | -1.741259 |
| C  | -3.631597 | 0.334201  | -1.975340 |
| N  | -2.776615 | -0.439757 | -1.297414 |
| Cu | 0.579201  | 1.445785  | -0.100120 |
| H  | -4.921399 | -2.049181 | 0.721426  |
| H  | -6.564099 | -0.603774 | -0.551474 |
| H  | -3.185993 | 0.989787  | -2.720346 |
| H  | -5.670388 | 0.955144  | -2.313387 |
| H  | -0.508770 | -3.261430 | 1.653840  |
| H  | 0.582167  | -3.292953 | 0.259516  |
| Cu | -0.612655 | -0.495797 | -1.150102 |
| B  | 2.126607  | -1.095298 | 0.743675  |
| O  | 2.411161  | 0.261094  | 0.577951  |
| O  | 3.003599  | -1.882216 | 0.047360  |
| C  | 3.725866  | 0.353295  | -0.090319 |
| C  | 3.814418  | -1.035729 | -0.817896 |
| Cl | 0.180208  | 1.274535  | -2.305330 |
| H  | 1.712482  | -2.523346 | 2.198415  |
| C  | 0.483178  | -0.981160 | 2.889972  |
| H  | 0.230323  | -1.687102 | 3.685299  |
| H  | 1.209717  | -0.266652 | 3.298508  |
| O  | -0.777460 | -0.334769 | 2.651956  |
| C  | -0.896286 | 0.894393  | 2.119627  |

|   |           |           |           |
|---|-----------|-----------|-----------|
| C | -2.199825 | 1.273792  | 1.757026  |
| C | 0.171006  | 1.815750  | 1.948765  |
| C | -2.451140 | 2.542257  | 1.237365  |
| H | -2.994826 | 0.547786  | 1.888915  |
| C | -0.108502 | 3.099610  | 1.404986  |
| H | 1.150535  | 1.609553  | 2.366724  |
| C | -1.414653 | 3.463178  | 1.049463  |
| H | -3.468006 | 2.805844  | 0.959697  |
| H | 0.697086  | 3.827026  | 1.340710  |
| H | -1.611434 | 4.444236  | 0.629346  |
| C | 5.220816  | -1.623534 | -0.890682 |
| H | 5.185663  | -2.590429 | -1.402387 |
| H | 5.884558  | -0.960380 | -1.457994 |
| H | 5.646950  | -1.783044 | 0.102794  |
| C | 3.153177  | -1.047868 | -2.198699 |
| H | 3.734914  | -0.471578 | -2.926169 |
| H | 3.088600  | -2.083628 | -2.546510 |
| H | 2.140640  | -0.638430 | -2.159723 |
| C | 4.749771  | 0.524497  | 1.036404  |
| H | 5.761316  | 0.650419  | 0.636809  |
| H | 4.495004  | 1.416719  | 1.617782  |
| H | 4.747675  | -0.336709 | 1.712456  |
| C | 3.732592  | 1.567585  | -1.009142 |
| H | 3.627171  | 2.483063  | -0.415829 |
| H | 4.683999  | 1.622863  | -1.550591 |
| H | 2.918262  | 1.534358  | -1.734816 |

Electronic Energy = -2106.40715696 (Hartree/Particle)

Dipole Moment (Debye): 6.9395

index 0

Harmonic frequencies

Number of imaginary frequencies= 0

#### THERMOCHEMICAL DATA

Temperature 298.150 Kelvin. Pressure 1.00000 Atm.

Zero-point correction= 0.452124

(Hartree/Particle)

Thermal correction to Energy= 0.483169

Thermal correction to Enthalpy= 0.484114

Thermal correction to Gibbs Free Energy= 0.389808

Sum of electronic and zero-point Energies= -2105.955033

Sum of electronic and thermal Energies= -2105.923987

Sum of electronic and thermal Enthalpies= -2105.923043

Sum of electronic and thermal Free Energies= -2106.017349

PCM-SP (solvent=THF;6-311+g(2d,p)) = -2106.80650319

Corrected Free Energy = -2106.41669523

-----

TS3-B and corresponding intermediate I3-B Ref 34 (main text)

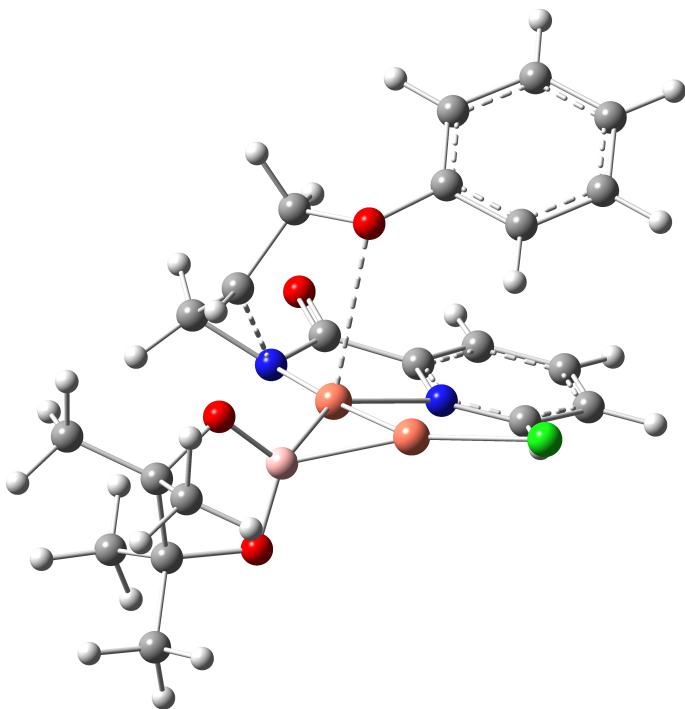

TS3-B (Ref 34)

Substrate: 1c

Path: Markovnikov

#### CARTESIAN COORDINATES

|    |           |           |           |
|----|-----------|-----------|-----------|
| C  | 0.307167  | -1.789726 | 1.469768  |
| N  | -0.124300 | -2.388471 | -0.375046 |
| C  | -1.426480 | -2.679262 | -0.769972 |
| O  | -1.991829 | -3.743583 | -0.531902 |
| C  | 0.404440  | -3.107495 | 0.772249  |
| C  | -2.105535 | -1.573850 | -1.536112 |
| C  | -3.362010 | -1.767478 | -2.104850 |
| C  | -3.976231 | -0.682631 | -2.736276 |
| C  | -3.321267 | 0.548565  | -2.759474 |
| C  | -2.066305 | 0.660748  | -2.153289 |
| N  | -1.472673 | -0.385768 | -1.566648 |
| Cu | 0.717306  | 1.809347  | -0.334041 |
| H  | -3.834073 | -2.740929 | -2.027526 |
| H  | -4.956690 | -0.795970 | -3.190328 |
| H  | -1.527935 | 1.603916  | -2.111060 |
| H  | -3.769233 | 1.419731  | -3.226821 |
| H  | -0.243078 | -3.909665 | 1.136877  |
| H  | 1.422777  | -3.463202 | 0.606676  |
| Cu | 0.298143  | -0.494479 | -0.401520 |
| B  | 2.211347  | 0.433584  | -0.093348 |
| O  | 2.813493  | 0.208233  | 1.141766  |
| O  | 3.121133  | 0.268171  | -1.124469 |
| C  | 4.256861  | 0.134498  | 0.935320  |
| C  | 4.346387  | -0.296360 | -0.570903 |
| Cl | -0.323420 | 3.661415  | -0.721303 |
| H  | 1.202765  | -1.237785 | 1.747666  |
| C  | -0.980254 | -1.448232 | 2.157016  |
| H  | -1.796404 | -2.066333 | 1.766062  |
| H  | -0.868980 | -1.672865 | 3.232324  |
| O  | -1.249900 | -0.064943 | 1.972179  |

|   |           |           |           |
|---|-----------|-----------|-----------|
| C | -2.561047 | 0.357867  | 1.899331  |
| C | -3.644027 | -0.360137 | 2.418124  |
| C | -2.757795 | 1.588588  | 1.261593  |
| C | -4.937287 | 0.161018  | 2.277978  |
| H | -3.498152 | -1.301007 | 2.939271  |
| C | -4.049363 | 2.095313  | 1.136874  |
| H | -1.902971 | 2.129266  | 0.867304  |
| C | -5.147867 | 1.383139  | 1.637474  |
| H | -5.778284 | -0.396986 | 2.682011  |
| H | -4.192914 | 3.050499  | 0.638483  |
| H | -6.153713 | 1.781276  | 1.534986  |
| C | 4.254791  | -1.814623 | -0.775269 |
| H | 4.111001  | -2.020822 | -1.840353 |
| H | 5.164782  | -2.323802 | -0.439223 |
| H | 3.398326  | -2.231424 | -0.234938 |
| C | 5.537905  | 0.270838  | -1.336074 |
| H | 6.480045  | -0.065126 | -0.886017 |
| H | 5.509710  | -0.077566 | -2.373709 |
| H | 5.523228  | 1.362911  | -1.347527 |
| C | 4.810612  | 1.539920  | 1.200083  |
| H | 4.526441  | 1.848106  | 2.211176  |
| H | 5.903202  | 1.561743  | 1.122582  |
| H | 4.392518  | 2.266598  | 0.496608  |
| C | 4.841073  | -0.863821 | 1.930195  |
| H | 5.912127  | -1.009722 | 1.745715  |
| H | 4.718782  | -0.483506 | 2.949840  |
| H | 4.343159  | -1.835104 | 1.868628  |

Electronic Energy = -2106.30448992 (Hartree/Particle)

Dipole Moment (Debye): 6.6327

index 1

Number of imaginary frequencies= 1

Negatives Eigenvalues: -164.577

# THERMOCHEMICAL DATA

Temperature 298.150 Kelvin. Pressure 1.00000 Atm.

Zero-point correction= 0.448288

(Hartree/Particle)

Thermal correction to Energy= 0.480008

Thermal correction to Enthalpy= 0.480953

Thermal correction to Gibbs Free Energy= 0.382024

Sum of electronic and zero-point Energies= -2105.856202

Sum of electronic and thermal Energies= -2105.824481

Sum of electronic and thermal Enthalpies= -2105.823537

Sum of electronic and thermal Free Energies= -2105.922465

PCM-SP (solvent=THF;6-311+g(2d,p)) = -2106.70645868

Corrected Free Energy = -2106.32443378

-----

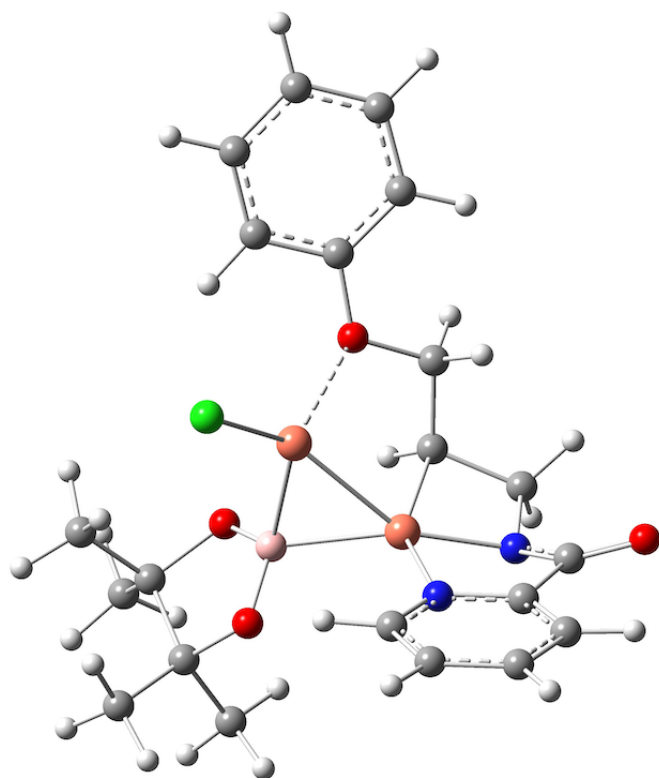

I2-B (Ref 34)

Substrate: 1c

Path: Markovnikov

#### CARTESIAN COORDINATES

|    |           |           |           |
|----|-----------|-----------|-----------|
| C  | 0.508959  | -0.951067 | -2.166175 |
| N  | -1.263181 | -2.261577 | -1.729352 |
| C  | -1.587622 | -3.352998 | -0.999813 |
| O  | -1.427235 | -4.541536 | -1.286086 |
| C  | -0.234266 | -2.168476 | -2.756774 |
| C  | -2.215215 | -2.927481 | 0.327868  |
| C  | -2.889162 | -3.817871 | 1.156593  |
| C  | -3.386137 | -3.348743 | 2.376072  |
| C  | -3.180704 | -2.014016 | 2.734832  |
| C  | -2.478477 | -1.182109 | 1.861366  |
| N  | -2.021116 | -1.637908 | 0.687838  |
| Cu | 0.681220  | 0.416354  | 0.758278  |
| H  | -2.996755 | -4.849077 | 0.836685  |
| H  | -3.920445 | -4.019545 | 3.043404  |
| H  | -2.264826 | -0.140616 | 2.078295  |
| H  | -3.543870 | -1.619573 | 3.678337  |
| H  | 0.382014  | -3.075950 | -2.832679 |
| H  | -0.667072 | -1.962838 | -3.742067 |
| Cu | -0.838395 | -0.753486 | -0.700583 |
| B  | -0.814301 | 1.311144  | -0.302817 |
| O  | -0.301958 | 2.287962  | -1.124943 |
| O  | -2.013663 | 1.665341  | 0.275806  |
| C  | -1.035438 | 3.520284  | -0.811288 |
| C  | -2.409554 | 2.955984  | -0.297503 |
| Cl | 1.139317  | 1.205019  | 2.709054  |
| H  | 0.516270  | -0.033412 | -2.755428 |
| C  | 1.851245  | -1.318316 | -1.584617 |
| H  | 1.796908  | -2.282005 | -1.060772 |

|   |           |           |           |
|---|-----------|-----------|-----------|
| H | 2.570810  | -1.415022 | -2.413444 |
| O | 2.318903  | -0.308549 | -0.683772 |
| C | 3.642540  | -0.352308 | -0.262236 |
| C | 4.511079  | -1.412355 | -0.537006 |
| C | 4.068556  | 0.746248  | 0.492210  |
| C | 5.826927  | -1.353822 | -0.057973 |
| H | 4.187484  | -2.279645 | -1.101040 |
| C | 5.377333  | 0.785145  | 0.966337  |
| H | 3.359351  | 1.534299  | 0.723753  |
| C | 6.266629  | -0.261626 | 0.689854  |
| H | 6.502638  | -2.177870 | -0.272096 |
| H | 5.700223  | 1.635347  | 1.560895  |
| H | 7.287002  | -0.226919 | 1.061115  |
| C | -3.402295 | 2.644669  | -1.422288 |
| H | -4.236881 | 2.068327  | -1.010460 |
| H | -3.800513 | 3.561975  | -1.869411 |
| H | -2.931868 | 2.046158  | -2.209220 |
| C | -3.072797 | 3.781492  | 0.799028  |
| H | -3.291712 | 4.793223  | 0.437028  |
| H | -4.017125 | 3.312673  | 1.095359  |
| H | -2.435985 | 3.853604  | 1.683443  |
| C | -0.227765 | 4.238457  | 0.276109  |
| H | 0.780843  | 4.429406  | -0.103835 |
| H | -0.685032 | 5.197432  | 0.543177  |
| H | -0.132105 | 3.622364  | 1.175857  |
| C | -1.120000 | 4.367473  | -2.075340 |
| H | -1.738928 | 5.255355  | -1.898787 |
| H | -0.117614 | 4.701338  | -2.362126 |
| H | -1.542960 | 3.806045  | -2.911973 |

Electronic Energy = -2106.31437690 (Hartree/Particle)  
Dipole Moment (Debye): 3.9688  
index 0  
Harmonic frequencies  
Number of imaginary frequencies= 0

#### THERMOCHEMICAL DATA

Temperature 298.150 Kelvin. Pressure 1.00000 Atm.  
Zero-point correction= 0.449496  
(Hartree/Particle)  
Thermal correction to Energy= 0.481514  
Thermal correction to Enthalpy= 0.482458  
Thermal correction to Gibbs Free Energy= 0.381930  
Sum of electronic and zero-point Energies= -2105.864881  
Sum of electronic and thermal Energies= -2105.832863  
Sum of electronic and thermal Enthalpies= -2105.831918  
Sum of electronic and thermal Free Energies= -2105.932447  
PCM-SP (solvent=THF;6-311+g(2d,p)) = -2106.71642467  
Corrected Free Energy = -2106.33449477

-----  
PATH: ANTI-OPENING. TS-ANTI and the corresponding minima: Complex-ANTI  
and intermediate I-ANTI (Ref 35 main text)

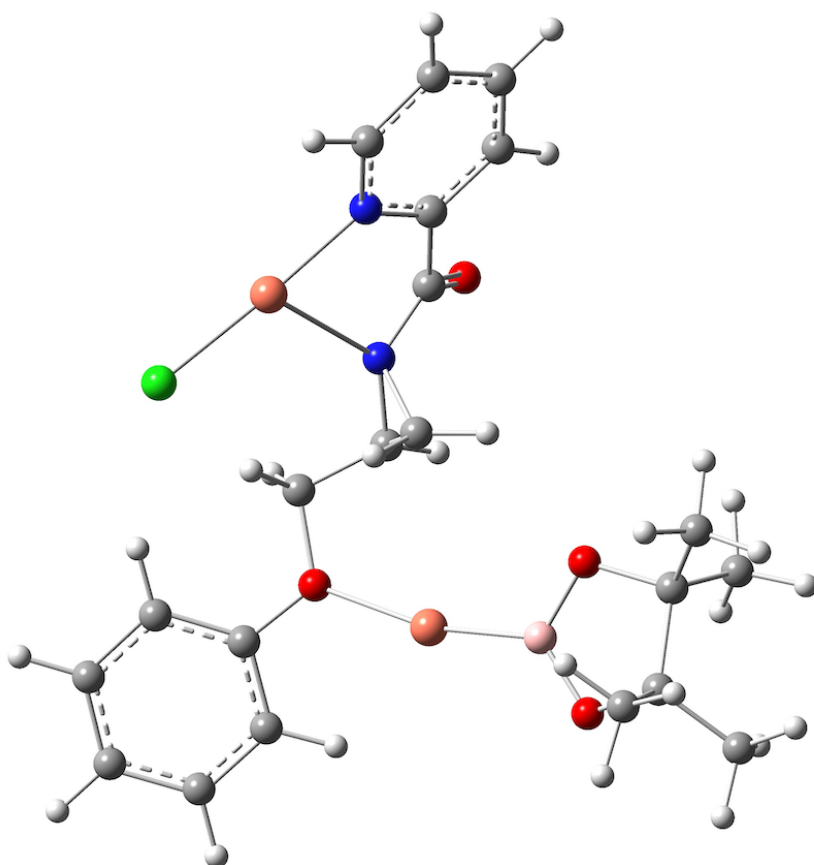

Complex-ANTI (Ref 35) Substrate: 1c

# CARTESIAN COORDINATES

|    |           |           |           |
|----|-----------|-----------|-----------|
| C  | -0.530065 | 0.642188  | 1.258186  |
| N  | -1.836307 | 0.158957  | 0.855423  |
| C  | -2.620921 | -0.649634 | 1.669422  |
| O  | -2.510553 | -0.746241 | 2.881582  |
| C  | -0.635360 | -0.337330 | 0.132573  |
| C  | -3.719808 | -1.357982 | 0.917332  |
| C  | -4.309111 | -2.489386 | 1.481823  |
| C  | -5.328212 | -3.141615 | 0.788718  |
| C  | -5.732845 | -2.630434 | -0.445569 |
| C  | -5.109124 | -1.485224 | -0.937710 |
| N  | -4.118765 | -0.852977 | -0.277117 |
| Cu | 2.231466  | 0.517867  | 0.292361  |
| H  | -3.957012 | -2.830176 | 2.449377  |
| H  | -5.797712 | -4.028693 | 1.203795  |
| H  | -5.402124 | -1.042360 | -1.883491 |
| H  | -6.523758 | -3.099745 | -1.021777 |
| B  | 2.850331  | -1.294343 | -0.057517 |
| O  | 4.135623  | -1.744986 | -0.312077 |
| O  | 1.949510  | -2.366317 | -0.075815 |
| C  | 4.072686  | -3.134461 | -0.740838 |
| C  | 2.707210  | -3.609543 | -0.131192 |
| H  | -0.309394 | -1.356868 | 0.319053  |
| H  | -0.548085 | 0.017374  | -0.891159 |
| H  | -0.143118 | 0.272996  | 2.206290  |
| C  | -0.282934 | 2.094681  | 0.930792  |
| H  | -0.825522 | 2.359066  | 0.018716  |
| H  | -0.590969 | 2.753133  | 1.750933  |

|    |           |           |           |
|----|-----------|-----------|-----------|
| O  | 1.145236  | 2.247915  | 0.732599  |
| C  | 1.634477  | 3.533407  | 0.498175  |
| C  | 2.993089  | 3.728716  | 0.760693  |
| C  | 0.835782  | 4.567345  | 0.006139  |
| C  | 3.562100  | 4.979790  | 0.524268  |
| H  | 3.583634  | 2.898829  | 1.139909  |
| C  | 1.421720  | 5.819088  | -0.218115 |
| H  | -0.211858 | 4.411791  | -0.226152 |
| C  | 2.777852  | 6.032218  | 0.037217  |
| H  | 4.619172  | 5.131169  | 0.725320  |
| H  | 0.805208  | 6.625379  | -0.606138 |
| H  | 3.221955  | 7.006942  | -0.143857 |
| Cu | -3.341995 | 0.785494  | -1.005406 |
| Cl | -2.604011 | 2.537813  | -1.964477 |
| C  | 4.080800  | -3.125632 | -2.276158 |
| H  | 4.974792  | -2.595791 | -2.620303 |
| H  | 4.098252  | -4.141864 | -2.686799 |
| H  | 3.205474  | -2.600054 | -2.670919 |
| C  | 5.304830  | -3.867045 | -0.215221 |
| H  | 5.247530  | -4.938009 | -0.446815 |
| H  | 6.204024  | -3.461588 | -0.691092 |
| H  | 5.414007  | -3.746396 | 0.865194  |
| C  | 1.935917  | -4.618565 | -0.978595 |
| H  | 2.520807  | -5.536343 | -1.116814 |
| H  | 0.999531  | -4.884778 | -0.475358 |
| H  | 1.686968  | -4.210994 | -1.961360 |
| C  | 2.830637  | -4.118754 | 1.311782  |
| H  | 1.826556  | -4.238177 | 1.732765  |
| H  | 3.342977  | -5.086641 | 1.356850  |
| H  | 3.375212  | -3.402574 | 1.935031  |

Electronic Energy = -2106.30357832 (Hartree/Particle)

Dipole Moment (Debye): 7.6683

index 0

Harmonic frequencies

Number of imaginary frequencies= 0

#### THERMOCHEMICAL DATA

Temperature 298.150 Kelvin. Pressure 1.00000 Atm.

Zero-point correction= 0.449832

(Hartree/Particle)

Thermal correction to Energy= 0.482532

Thermal correction to Enthalpy= 0.483476

Thermal correction to Gibbs Free Energy= 0.378741

Sum of electronic and zero-point Energies= -2105.853746

Sum of electronic and thermal Energies= -2105.821046

Sum of electronic and thermal Enthalpies= -2105.820102

Sum of electronic and thermal Free Energies= -2105.924837

PCM-SP (solvent=THF;6-311+g(2d,p)) = -2106.70537461

Corrected Free Energy = -2106.32663329

-----

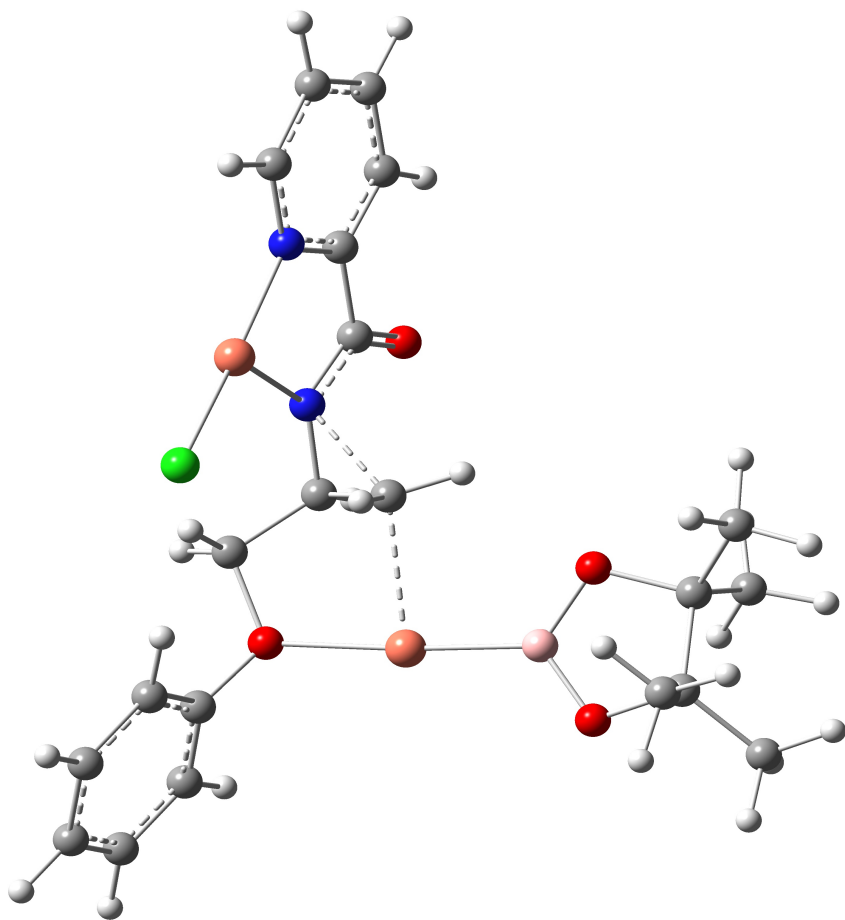

TS-ANTI (Ref 35)      Substrate: 1c  
 Path: anti-Markovnikov

# CARTESIAN COORDINATES

|    |           |           |           |
|----|-----------|-----------|-----------|
| C  | 0.749321  | 0.642419  | -1.470800 |
| N  | 1.999441  | 0.203127  | -0.899466 |
| C  | 2.706054  | -0.772974 | -1.566444 |
| O  | 2.428491  | -1.276487 | -2.656195 |
| C  | 0.277393  | -0.285548 | -0.415727 |
| C  | 3.957394  | -1.191754 | -0.823493 |
| C  | 4.794979  | -2.156873 | -1.385523 |
| C  | 5.950190  | -2.536110 | -0.702670 |
| C  | 6.231432  | -1.937492 | 0.526792  |
| C  | 5.345676  | -0.982905 | 1.025899  |
| N  | 4.231648  | -0.610142 | 0.369993  |
| Cu | -1.915096 | 0.432228  | -0.585254 |
| H  | 4.519104  | -2.584999 | -2.342863 |
| H  | 6.617376  | -3.284432 | -1.121156 |
| H  | 5.517698  | -0.491081 | 1.977465  |
| H  | 7.117973  | -2.198925 | 1.095942  |
| B  | -2.669768 | -1.309688 | -0.104701 |
| O  | -4.005133 | -1.548146 | 0.147224  |
| O  | -1.912966 | -2.462894 | 0.034051  |
| C  | -4.131232 | -2.891824 | 0.708693  |
| C  | -2.825686 | -3.592892 | 0.188257  |
| H  | 0.170005  | -1.340163 | -0.637690 |

|    |           |           |           |
|----|-----------|-----------|-----------|
| H  | 0.276586  | 0.035752  | 0.622041  |
| H  | 0.551829  | 0.311027  | -2.492424 |
| C  | 0.451269  | 2.106578  | -1.209662 |
| H  | 0.904737  | 2.412881  | -0.263882 |
| H  | 0.790205  | 2.754003  | -2.024678 |
| O  | -1.001527 | 2.202949  | -1.120577 |
| C  | -1.519477 | 3.421567  | -0.647300 |
| C  | -2.417219 | 4.096002  | -1.471385 |
| C  | -1.182489 | 3.890328  | 0.623018  |
| C  | -2.997360 | 5.281523  | -1.009594 |
| H  | -2.653795 | 3.686658  | -2.448998 |
| C  | -1.763049 | 5.082012  | 1.065974  |
| H  | -0.487070 | 3.338250  | 1.250078  |
| C  | -2.668469 | 5.777129  | 0.256166  |
| H  | -3.702550 | 5.815606  | -1.640713 |
| H  | -1.509435 | 5.459676  | 2.052642  |
| H  | -3.118206 | 6.700078  | 0.611950  |
| Cu | 2.941048  | 0.704754  | 1.097341  |
| Cl | 1.700973  | 1.989016  | 2.312967  |
| C  | -2.984185 | -4.222020 | -1.201978 |
| H  | -1.995777 | -4.506446 | -1.577287 |
| H  | -3.614113 | -5.117983 | -1.168142 |
| H  | -3.422650 | -3.510677 | -1.909049 |
| C  | -2.201149 | -4.596278 | 1.153544  |
| H  | -2.899087 | -5.416285 | 1.362144  |
| H  | -1.296448 | -5.023156 | 0.707427  |
| H  | -1.921098 | -4.125227 | 2.098622  |
| C  | -5.436861 | -3.506602 | 0.212915  |
| H  | -5.523555 | -4.548137 | 0.546090  |
| H  | -6.284992 | -2.945564 | 0.619126  |
| H  | -5.506756 | -3.479741 | -0.877008 |
| C  | -4.167242 | -2.728082 | 2.233731  |
| H  | -4.993608 | -2.060569 | 2.497817  |
| H  | -4.320914 | -3.688963 | 2.737690  |
| H  | -3.240030 | -2.280368 | 2.605231  |

Electronic Energy = -2106.29170211 (Hartree/Particle)

Dipole Moment (Debye): 4.4089

index 1

Number of imaginary frequencies= 1

Negatives Eigenvalues: -368.166

#### THERMOCHEMICAL DATA

Temperature 298.150 Kelvin. Pressure 1.00000 Atm.

Zero-point correction= 0.448483

(Hartree/Particle)

Thermal correction to Energy= 0.480537

Thermal correction to Enthalpy= 0.481481

Thermal correction to Gibbs Free Energy= 0.380349

Sum of electronic and zero-point Energies= -2105.843219

Sum of electronic and thermal Energies= -2105.811165

Sum of electronic and thermal Enthalpies= -2105.810221

Sum of electronic and thermal Free Energies= -2105.911353

PCM-SP (solvent=THF;6-311+g(2d,p)) = -2106.69111316

Corrected Free Energy = -2106.310764052

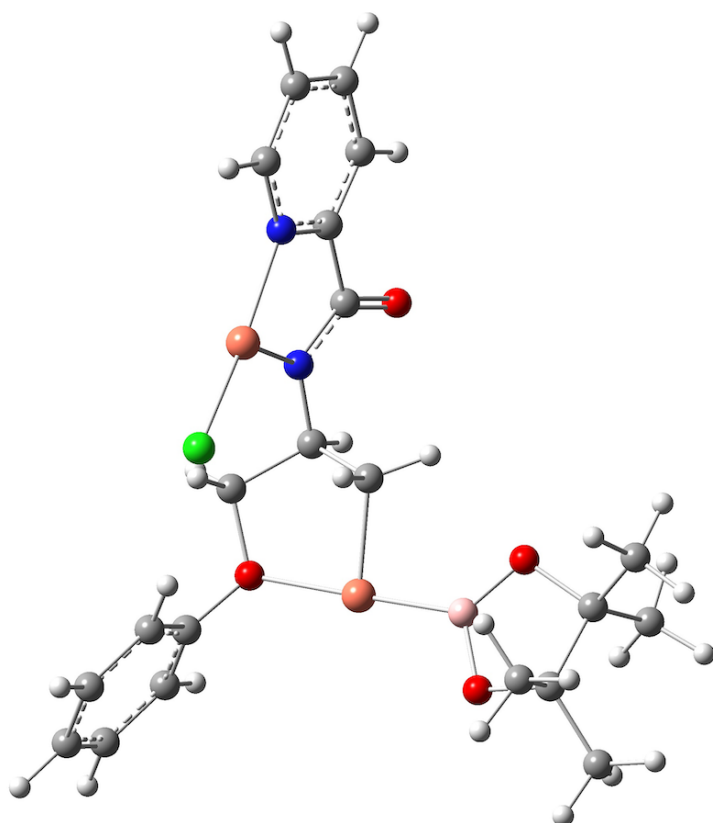

I-ANTI (Ref 35)

Substrate: 1c

Path: anti-Markovnikov

# CARTESIAN COORDINATES

|    |           |           |           |
|----|-----------|-----------|-----------|
| C  | 0.870390  | 0.483220  | -1.391602 |
| N  | 2.163295  | 0.148304  | -0.863028 |
| C  | 2.891909  | -0.789973 | -1.503370 |
| O  | 2.635123  | -1.379778 | -2.567586 |
| C  | 0.012736  | -0.433938 | -0.515526 |
| C  | 4.186542  | -1.101449 | -0.766692 |
| C  | 5.167254  | -1.883078 | -1.379666 |
| C  | 6.346795  | -2.158255 | -0.688183 |
| C  | 6.506738  | -1.649025 | 0.602734  |
| C  | 5.476443  | -0.885490 | 1.151537  |
| N  | 4.340703  | -0.612882 | 0.486959  |
| Cu | -1.760464 | 0.423450  | -0.784135 |
| H  | 4.976409  | -2.254938 | -2.380450 |
| H  | 7.126934  | -2.760550 | -1.146143 |
| H  | 5.544872  | -0.474916 | 2.154092  |
| H  | 7.405974  | -1.839122 | 1.180715  |
| B  | -2.602849 | -1.273764 | -0.269085 |
| O  | -3.894121 | -1.184739 | 0.179168  |
| O  | -2.103652 | -2.543617 | -0.270648 |
| C  | -4.236650 | -2.497121 | 0.758239  |
| C  | -3.218893 | -3.451063 | 0.030454  |
| H  | 0.040428  | -1.480861 | -0.807503 |
| H  | 0.142433  | -0.270237 | 0.558583  |
| H  | 0.750683  | 0.227880  | -2.451365 |
| C  | 0.601585  | 1.961569  | -1.132569 |
| H  | 0.924892  | 2.221517  | -0.122864 |
| H  | 1.084493  | 2.605867  | -1.872072 |

|    |           |           |           |
|----|-----------|-----------|-----------|
| O  | -0.852806 | 2.165049  | -1.241774 |
| C  | -1.369796 | 3.351751  | -0.685853 |
| C  | -2.100466 | 4.184701  | -1.529969 |
| C  | -1.194000 | 3.634822  | 0.669746  |
| C  | -2.678032 | 5.342253  | -0.998931 |
| H  | -2.207418 | 3.921161  | -2.578064 |
| C  | -1.770673 | 4.800235  | 1.182216  |
| H  | -0.616275 | 2.967726  | 1.306160  |
| C  | -2.511859 | 5.651731  | 0.354910  |
| H  | -3.251827 | 6.001070  | -1.645064 |
| H  | -1.639753 | 5.035814  | 2.234649  |
| H  | -2.958234 | 6.553833  | 0.764252  |
| Cu | 2.767511  | 0.464167  | 1.169616  |
| Cl | 1.336044  | 1.443179  | 2.504410  |
| C  | -2.686910 | -4.597144 | 0.883765  |
| H  | -3.508313 | -5.250351 | 1.201400  |
| H  | -1.980776 | -5.194541 | 0.298232  |
| H  | -2.165293 | -4.231553 | 1.770958  |
| C  | -3.726108 | -3.974791 | -1.317437 |
| H  | -2.897288 | -4.456557 | -1.845232 |
| H  | -4.527072 | -4.709613 | -1.182616 |
| H  | -4.100373 | -3.160071 | -1.945657 |
| C  | -5.706708 | -2.779725 | 0.472706  |
| H  | -5.974603 | -3.786030 | 0.816274  |
| H  | -6.331542 | -2.057929 | 1.008436  |
| H  | -5.935051 | -2.700874 | -0.592556 |
| C  | -3.992703 | -2.376814 | 2.265923  |
| H  | -4.597808 | -1.554231 | 2.659383  |
| H  | -4.275670 | -3.297290 | 2.787881  |
| H  | -2.942602 | -2.159121 | 2.484695  |

Electronic Energy = -2106.29855042 (Hartree/Particle)

Dipole Moment (Debye): 4.8348

index 0

Harmonic frequencies

Number of imaginary frequencies= 0

#### THERMOCHEMICAL DATA

Temperature 298.150 Kelvin. Pressure 1.00000 Atm.

Zero-point correction= 0.449219

(Hartree/Particle)

Thermal correction to Energy= 0.481494

Thermal correction to Enthalpy= 0.482438

Thermal correction to Gibbs Free Energy= 0.380654

Sum of electronic and zero-point Energies= -2105.849331

Sum of electronic and thermal Energies= -2105.817057

Sum of electronic and thermal Enthalpies= -2105.816113

Sum of electronic and thermal Free Energies= -2105.917897

PCM-SP (solvent=THF;6-311+g(2d,p)) = -2106.70346197

Corrected Free Energy = -2106.32280855

MODEL: [Az-(Cu)2-Bpin]+/Et2O

SUBSTRATE: N-(2-PICOLINOYL)-METHYL AZIRIDINE

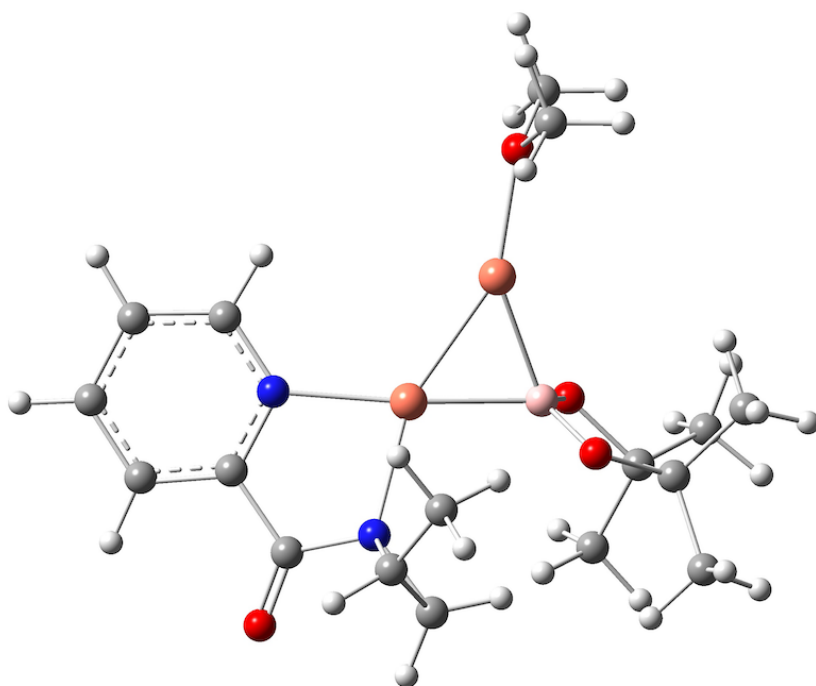

Complex-3      Substrate: N-(2-picolinoyl)-methyl aziridine

# CARTESIAN COORDINATES

|    |           |           |           |
|----|-----------|-----------|-----------|
| C  | -1.622828 | -2.024526 | 2.067654  |
| N  | -1.634373 | -1.650290 | 0.586061  |
| C  | -2.920781 | -1.735007 | -0.032439 |
| O  | -3.503346 | -2.773999 | -0.262503 |
| C  | -1.027365 | -2.916992 | 1.050105  |
| C  | -3.494921 | -0.391474 | -0.384133 |
| C  | -4.831857 | -0.281133 | -0.764719 |
| C  | -5.334804 | 0.984322  | -1.074148 |
| C  | -4.481917 | 2.086885  | -0.998723 |
| C  | -3.151618 | 1.886600  | -0.623648 |
| N  | -2.664364 | 0.674298  | -0.319376 |
| Cu | 0.947242  | 1.800979  | 0.156688  |
| H  | -5.444890 | -1.174806 | -0.810273 |
| H  | -6.372484 | 1.106273  | -1.369936 |
| H  | -2.445156 | 2.708560  | -0.567791 |
| H  | -4.831799 | 3.087196  | -1.232769 |
| H  | -1.552506 | -3.825486 | 0.768996  |
| H  | 0.053315  | -2.914088 | 0.949190  |
| C  | -0.805652 | -1.160460 | 2.990741  |
| H  | -0.663354 | -1.685524 | 3.942945  |
| H  | 0.176536  | -0.946576 | 2.560435  |
| Cu | -0.702231 | 0.172544  | 0.022006  |
| B  | 1.308136  | -0.220973 | -0.175610 |
| O  | 1.875196  | -1.050364 | 0.774563  |
| O  | 1.841024  | -0.422532 | -1.430556 |
| C  | 3.045029  | -1.694165 | 0.157435  |
| C  | 2.697105  | -1.614414 | -1.372602 |
| C  | 4.258412  | -0.845567 | 0.553975  |
| H  | 4.314497  | -0.791679 | 1.645614  |
| H  | 5.190617  | -1.281199 | 0.180554  |
| H  | 4.170398  | 0.174663  | 0.165507  |
| C  | 3.180497  | -3.105550 | 0.717114  |

|   |           |           |           |
|---|-----------|-----------|-----------|
| H | 4.012817  | -3.628842 | 0.232995  |
| H | 3.385786  | -3.060820 | 1.791434  |
| H | 2.273736  | -3.696218 | 0.567509  |
| C | 3.892455  | -1.399642 | -2.294478 |
| H | 4.596018  | -2.235799 | -2.209405 |
| H | 3.552979  | -1.344598 | -3.333430 |
| H | 4.422050  | -0.473021 | -2.062121 |
| C | 1.840844  | -2.783234 | -1.872497 |
| H | 1.484522  | -2.556505 | -2.881810 |
| H | 2.416587  | -3.713658 | -1.909704 |
| H | 0.965057  | -2.938180 | -1.234536 |
| H | -2.610052 | -2.315554 | 2.425265  |
| H | -1.322988 | -0.216858 | 3.199391  |
| O | 1.572752  | 3.670284  | 0.377573  |
| C | 2.232441  | 4.326414  | -0.726013 |
| H | 3.310902  | 4.134849  | -0.687419 |
| H | 1.810673  | 3.908406  | -1.641204 |
| H | 2.035915  | 5.403058  | -0.678657 |
| C | 2.009796  | 4.141289  | 1.669142  |
| H | 3.078182  | 3.936560  | 1.803448  |
| H | 1.816329  | 5.216585  | 1.749058  |
| H | 1.427450  | 3.600703  | 2.416660  |

Electronic Energy = -1494.66752736 (Hartree/Particle)

Dipole Moment (Debye): 6.5515

index 0

Harmonic frequencies

Number of imaginary frequencies= 0

#### THERMOCHEMICAL DATA

Temperature 298.150 Kelvin. Pressure 1.00000 Atm.

Zero-point correction= 0.445587

(Hartree/Particle)

Thermal correction to Energy= 0.476418

Thermal correction to Enthalpy= 0.477363

Thermal correction to Gibbs Free Energy= 0.379819

Sum of electronic and zero-point Energies= -1494.221940

Sum of electronic and thermal Energies= -1494.191109

Sum of electronic and thermal Enthalpies= -1494.190165

Sum of electronic and thermal Free Energies= -1494.287708

PCM-SP (solvent=THF;6-311+g(2d,p)) = -1495.03244674

Corrected Free Energy = -1494.65262738

-----  
PATH: ANTI\_MARKOVNIKOV

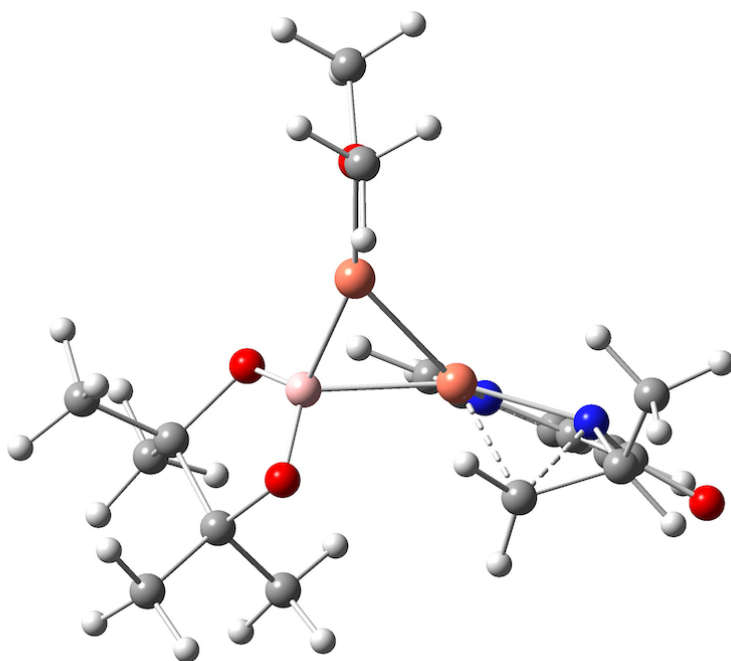

TS6                      Substrate: N-(2-picolinoyl)-methyl aziridine  
                              Path: anti-markovnikov

#### CARTESIAN COORDINATES

|    |           |           |           |
|----|-----------|-----------|-----------|
| C  | -0.519753 | -1.705512 | 2.098655  |
| N  | -1.719718 | -2.022773 | 0.601200  |
| C  | -2.995355 | -1.471731 | 0.395808  |
| O  | -4.003184 | -1.879996 | 0.950359  |
| C  | -1.498241 | -2.791461 | 1.821734  |
| C  | -3.040690 | -0.386718 | -0.649237 |
| C  | -4.254505 | 0.077438  | -1.150180 |
| C  | -4.228434 | 1.095576  | -2.107426 |
| C  | -2.998119 | 1.618888  | -2.511181 |
| C  | -1.827458 | 1.111109  | -1.941894 |
| N  | -1.856035 | 0.122734  | -1.038155 |
| Cu | 1.981935  | -0.858003 | -0.428744 |
| H  | -5.179916 | -0.354950 | -0.785013 |
| H  | -5.154679 | 1.476381  | -2.527602 |
| H  | -0.843833 | 1.498488  | -2.187151 |
| H  | -2.938516 | 2.409737  | -3.252164 |
| H  | -2.375483 | -2.792596 | 2.473371  |
| H  | -0.844070 | -0.817819 | 2.633829  |
| Cu | -0.333172 | -0.793036 | 0.063376  |
| B  | 1.061889  | 0.841975  | 0.192948  |
| O  | 1.058368  | 1.890486  | -0.697158 |
| O  | 0.952632  | 1.252091  | 1.503048  |
| C  | 1.151060  | 3.137260  | 0.083044  |
| C  | 0.615447  | 2.686069  | 1.489779  |
| H  | 0.548843  | -1.902779 | 2.067133  |
| C  | -0.943630 | -4.185011 | 1.587081  |
| H  | -0.623849 | -4.629252 | 2.536527  |
| H  | -1.710626 | -4.827488 | 1.143777  |
| C  | 1.288237  | 3.354821  | 2.682209  |
| H  | 1.124357  | 4.438083  | 2.653733  |
| H  | 0.860112  | 2.971006  | 3.613512  |
| H  | 2.363488  | 3.164827  | 2.700114  |

|   |           |           |           |
|---|-----------|-----------|-----------|
| C | -0.910379 | 2.760797  | 1.617866  |
| H | -1.215735 | 2.258963  | 2.541564  |
| H | -1.257633 | 3.797781  | 1.661980  |
| H | -1.404421 | 2.261070  | 0.778622  |
| C | 2.629940  | 3.534851  | 0.087982  |
| H | 2.974456  | 3.640730  | -0.945239 |
| H | 2.783503  | 4.488742  | 0.602556  |
| H | 3.245018  | 2.772351  | 0.576786  |
| C | 0.310877  | 4.201599  | -0.613891 |
| H | 0.290343  | 5.121860  | -0.019333 |
| H | 0.747717  | 4.437747  | -1.589415 |
| H | -0.717762 | 3.868413  | -0.771322 |
| H | -0.085759 | -4.149322 | 0.905038  |
| O | 3.361647  | -2.111517 | -1.077823 |
| C | 4.444972  | -2.553912 | -0.233470 |
| H | 4.656621  | -3.609277 | -0.436225 |
| H | 5.336814  | -1.944269 | -0.417279 |
| H | 4.114077  | -2.431505 | 0.798944  |
| C | 3.638435  | -2.244064 | -2.488692 |
| H | 2.744799  | -1.913405 | -3.019858 |
| H | 4.494284  | -1.617113 | -2.762803 |
| H | 3.844412  | -3.294376 | -2.720994 |

Electronic Energy = -1494.63027914 (Hartree/Particle)

Dipole Moment (Debye): 4.9667

index 1

Number of imaginary frequencies= 1

Negatives Eigenvalues: -218.939

#### THERMOCHEMICAL DATA

Temperature 298.150 Kelvin. Pressure 1.00000 Atm.

Zero-point correction= 0.443468  
(Hartree/Particle)

Thermal correction to Energy= 0.473912

Thermal correction to Enthalpy= 0.474856

Thermal correction to Gibbs Free Energy= 0.378379

Sum of electronic and zero-point Energies= -1494.186811

Sum of electronic and thermal Energies= -1494.156367

Sum of electronic and thermal Enthalpies= -1494.155423

Sum of electronic and thermal Free Energies= -1494.251900

PCM-SP (solvent=THF;6-311+g(2d,p)) = -1494.99838714

Corrected Free Energy = -1494.62000800

-----

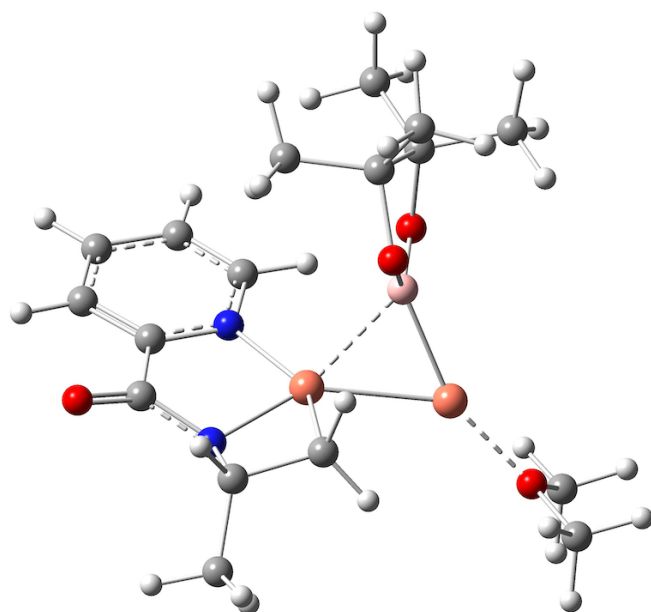

I4                      Substrate: N-(2-picolinoyl)-methyl aziridine  
 Path: anti-markovnikov

# CARTESIAN COORDINATES

|    |           |           |           |
|----|-----------|-----------|-----------|
| C  | -0.062028 | -2.001004 | -1.752783 |
| N  | 1.753341  | -1.993420 | -0.575061 |
| C  | 2.983136  | -1.418280 | -0.382117 |
| O  | 4.003913  | -1.698031 | -0.996859 |
| C  | 1.327208  | -2.625282 | -1.822674 |
| C  | 2.954379  | -0.402353 | 0.740642  |
| C  | 4.116387  | 0.086603  | 1.326314  |
| C  | 3.998336  | 1.034123  | 2.346793  |
| C  | 2.726734  | 1.468135  | 2.730198  |
| C  | 1.608305  | 0.949359  | 2.076509  |
| N  | 1.727403  | 0.028766  | 1.107499  |
| Cu | -1.966066 | -0.792231 | 0.433375  |
| H  | 5.075211  | -0.277581 | 0.972147  |
| H  | 4.885035  | 1.430387  | 2.832972  |
| H  | 0.600248  | 1.279466  | 2.299837  |
| H  | 2.595456  | 2.202660  | 3.518193  |
| H  | 1.905548  | -2.242211 | -2.672862 |
| H  | -0.313732 | -1.201991 | -2.449388 |
| Cu | 0.344827  | -0.885595 | -0.095731 |
| B  | -1.004531 | 0.854947  | -0.243478 |
| O  | -1.024645 | 1.916502  | 0.621517  |
| O  | -0.806096 | 1.213386  | -1.550870 |
| C  | -1.027522 | 3.148409  | -0.197301 |
| C  | -0.421140 | 2.640006  | -1.555985 |
| H  | -0.886819 | -2.667617 | -1.497809 |
| C  | 1.375893  | -4.145541 | -1.787769 |
| H  | 0.938095  | -4.560918 | -2.703743 |
| H  | 2.412269  | -4.489441 | -1.712392 |
| C  | -0.998498 | 3.292098  | -2.805458 |
| H  | -0.801736 | 4.370097  | -2.796002 |
| H  | -0.525661 | 2.868517  | -3.696815 |
| H  | -2.076193 | 3.134557  | -2.885096 |
| C  | 1.110591  | 2.658003  | -1.591227 |
| H  | 1.454262  | 2.109901  | -2.473756 |

|   |           |           |           |
|---|-----------|-----------|-----------|
| H | 1.494413  | 3.681147  | -1.651002 |
| H | 1.535996  | 2.176745  | -0.705038 |
| C | -2.488846 | 3.590973  | -0.302729 |
| H | -2.891567 | 3.738874  | 0.703897  |
| H | -2.577820 | 4.533828  | -0.851482 |
| H | -3.099208 | 2.835681  | -0.808368 |
| C | -0.194168 | 4.200046  | 0.525115  |
| H | -0.101918 | 5.101267  | -0.091295 |
| H | -0.683076 | 4.479723  | 1.463607  |
| H | 0.808916  | 3.834537  | 0.756945  |
| H | 0.819416  | -4.528156 | -0.923835 |
| O | -3.418709 | -1.934754 | 1.095072  |
| C | -4.371119 | -2.556540 | 0.204661  |
| H | -4.549977 | -3.587601 | 0.527299  |
| H | -5.307444 | -1.987852 | 0.204326  |
| H | -3.928182 | -2.548745 | -0.792378 |
| C | -3.853824 | -1.897223 | 2.472678  |
| H | -4.768279 | -1.300084 | 2.557718  |
| H | -4.029237 | -2.919087 | 2.824891  |
| H | -3.049285 | -1.437309 | 3.048025  |

Electronic Energy = -1494.63618139 (Hartree/Particle)

Dipole Moment (Debye): 7.4110

index 0

Harmonic frequencies

Number of imaginary frequencies= 0

#### THERMOCHEMICAL DATA

Temperature 298.150 Kelvin. Pressure 1.00000 Atm.

Zero-point correction= 0.444581

(Hartree/Particle)

Thermal correction to Energy= 0.475281

Thermal correction to Enthalpy= 0.476226

Thermal correction to Gibbs Free Energy= 0.379534

Sum of electronic and zero-point Energies= -1494.191600

Sum of electronic and thermal Energies= -1494.160900

Sum of electronic and thermal Enthalpies= -1494.159956

Sum of electronic and thermal Free Energies= -1494.256648

PCM-SP (solvent=THF;6-311+g(2d,p)) = -1495.00805742

Corrected Free Energy = -1494.62852403

-----

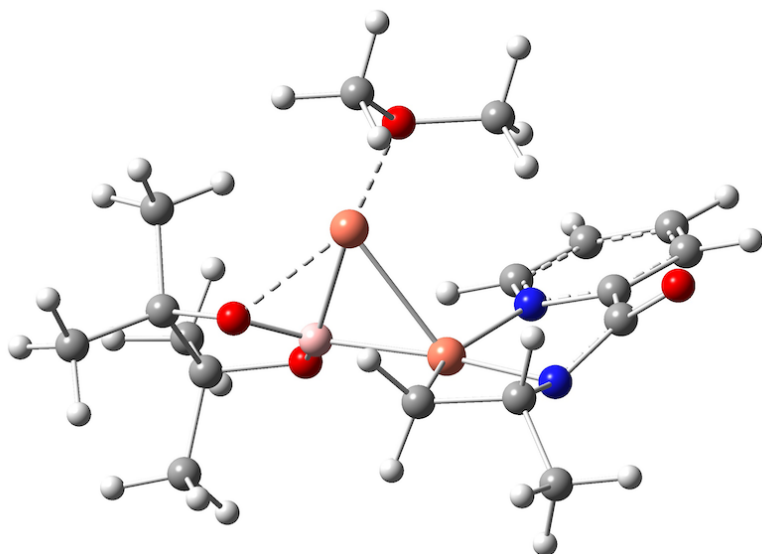

TS7                      Substrate: N-(2-picolinoyl)-methyl aziridine  
 Path: anti-markovnikov

# CARTESIAN COORDINATES

|    |           |           |           |
|----|-----------|-----------|-----------|
| N  | -1.341523 | 1.690711  | -0.070809 |
| C  | -2.684775 | 1.534832  | -0.119351 |
| C  | -3.502407 | 2.443409  | -0.781734 |
| C  | -2.910435 | 3.562834  | -1.373802 |
| C  | -1.523400 | 3.724743  | -1.301954 |
| C  | -0.763043 | 2.755033  | -0.648428 |
| C  | -3.209900 | 0.271926  | 0.547683  |
| O  | -4.284303 | -0.233400 | 0.224959  |
| Cu | -0.562472 | 0.093511  | 0.886909  |
| N  | -2.319811 | -0.181747 | 1.469437  |
| C  | -2.235886 | -1.576381 | 1.921501  |
| C  | -0.707266 | -1.660718 | 1.857030  |
| B  | 1.462592  | 0.134015  | 0.448949  |
| Cu | 0.431260  | -1.188648 | -0.888183 |
| O  | 2.363783  | -0.895944 | 0.217601  |
| C  | 3.673057  | -0.258370 | -0.116340 |
| C  | 4.782175  | -1.139407 | 0.439383  |
| O  | 2.050516  | 1.356521  | 0.527906  |
| C  | 3.518661  | 1.142944  | 0.575730  |
| C  | 3.905101  | 1.144256  | 2.056170  |
| C  | 3.730811  | -0.194077 | -1.643313 |
| C  | 4.186280  | 2.295649  | -0.162979 |
| H  | -4.571130 | 2.258782  | -0.817415 |
| H  | -3.522486 | 4.300528  | -1.884668 |
| H  | 0.317634  | 2.811055  | -0.565052 |
| H  | -1.033003 | 4.584801  | -1.746180 |
| H  | -0.182884 | -1.438534 | 2.790043  |
| H  | 4.683342  | 0.220136  | -1.986966 |
| H  | 3.633915  | -1.206263 | -2.049235 |
| H  | 2.919230  | 0.420683  | -2.048309 |
| H  | 4.802071  | -2.095663 | -0.092327 |
| H  | 5.753718  | -0.652405 | 0.298711  |
| H  | 4.645185  | -1.342891 | 1.503165  |
| H  | 4.019044  | 3.229122  | 0.382641  |
| H  | 5.267521  | 2.129226  | -0.227008 |

|   |           |           |           |
|---|-----------|-----------|-----------|
| H | 3.791654  | 2.415976  | -1.174536 |
| H | 4.988740  | 1.053170  | 2.180345  |
| H | 3.584812  | 2.087833  | 2.507353  |
| H | 3.422265  | 0.325597  | 2.599449  |
| O | -0.689347 | -2.076670 | -2.220289 |
| C | -0.553617 | -3.499652 | -2.439165 |
| H | -0.985002 | -3.756069 | -3.412089 |
| H | 0.514781  | -3.719563 | -2.435495 |
| H | -1.060676 | -4.053788 | -1.641053 |
| C | -2.067504 | -1.621729 | -2.246827 |
| H | -2.621747 | -2.032478 | -1.396887 |
| H | -2.040318 | -0.533938 | -2.180929 |
| H | -2.527580 | -1.927980 | -3.191290 |
| H | -2.702179 | -2.243221 | 1.183174  |
| H | -0.255068 | -2.500671 | 1.329066  |
| C | -2.845078 | -1.820622 | 3.296219  |
| H | -3.925950 | -1.647315 | 3.261933  |
| H | -2.668238 | -2.853344 | 3.620507  |
| H | -2.407946 | -1.138705 | 4.034511  |

Electronic Energy = -1494.62665898 (Hartree/Particle)

Dipole Moment (Debye): 6.1152

index 1

Number of imaginary frequencies= 1

Negatives Eigenvalues: -54.390

#### THERMOCHEMICAL DATA

Temperature 298.150 Kelvin. Pressure 1.00000 Atm.

Zero-point correction= 0.444377

(Hartree/Particle)

Thermal correction to Energy= 0.474024

Thermal correction to Enthalpy= 0.474969

Thermal correction to Gibbs Free Energy= 0.382269

Sum of electronic and zero-point Energies= -1494.182282

Sum of electronic and thermal Energies= -1494.152635

Sum of electronic and thermal Enthalpies= -1494.151690

Sum of electronic and thermal Free Energies= -1494.244390

PCM-SP (solvent=THF;6-311+g(2d,p)) = -1494.99926829

Corrected Free Energy = -1494.61699931

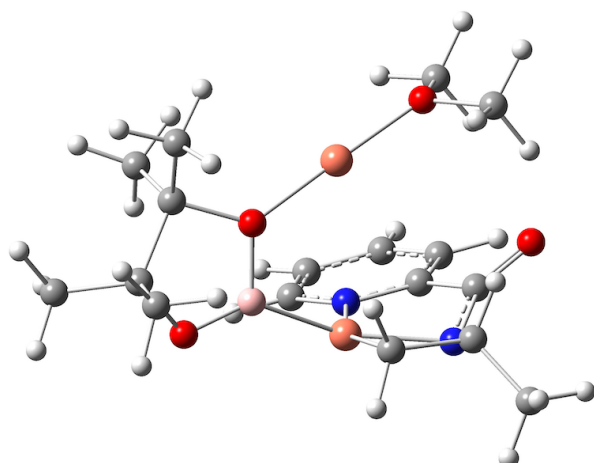

I5

Substrate: N-(2-picolinoyl)-methyl aziridine

Path: anti-markovnikov

CARTESIAN COORDINATES

|    |           |           |           |
|----|-----------|-----------|-----------|
| N  | -1.434097 | -1.638047 | -0.767203 |
| C  | -2.649461 | -1.148160 | -0.417649 |
| C  | -3.636065 | -1.965398 | 0.125796  |
| C  | -3.373430 | -3.329660 | 0.270682  |
| C  | -2.122259 | -3.829460 | -0.104622 |
| C  | -1.170744 | -2.945663 | -0.610968 |
| C  | -2.808743 | 0.359624  | -0.587834 |
| O  | -3.539707 | 0.998669  | 0.187096  |
| Cu | -0.340116 | -0.082714 | -1.448442 |
| N  | -2.013303 | 0.805357  | -1.574585 |
| C  | -1.473320 | 2.176900  | -1.619696 |
| C  | 0.016351  | 1.823660  | -1.825586 |
| B  | 1.530134  | -0.243412 | -0.914414 |
| Cu | 0.338963  | 0.680745  | 1.525958  |
| O  | 1.788771  | 0.174682  | 0.426023  |
| C  | 3.169524  | -0.285741 | 0.802068  |
| C  | 3.770533  | 0.747484  | 1.740781  |
| O  | 2.665175  | -0.685046 | -1.490635 |
| C  | 3.819084  | -0.374396 | -0.621639 |
| C  | 4.382676  | 0.959057  | -1.118187 |
| C  | 2.986785  | -1.633639 | 1.496175  |
| C  | 4.843619  | -1.491428 | -0.773607 |
| H  | -4.583933 | -1.521771 | 0.412717  |
| H  | -4.132990 | -3.996244 | 0.669090  |
| H  | -0.179343 | -3.273734 | -0.907490 |
| H  | -1.883479 | -4.883650 | -0.009003 |
| H  | 3.946115  | -2.026369 | 1.845797  |
| H  | 2.334704  | -1.506119 | 2.367775  |
| H  | 2.530730  | -2.370203 | 0.828033  |
| H  | 3.223816  | 0.753912  | 2.690726  |
| H  | 4.813707  | 0.494663  | 1.958524  |
| H  | 3.738274  | 1.752842  | 1.316107  |
| H  | 5.240187  | -1.485872 | -1.792840 |
| H  | 5.679521  | -1.339826 | -0.081336 |
| H  | 4.405353  | -2.474245 | -0.587125 |
| H  | 5.287801  | 1.236537  | -0.568746 |
| H  | 4.638018  | 0.862060  | -2.177016 |
| H  | 3.650472  | 1.767358  | -1.018880 |
| H  | -1.623902 | 2.670902  | -0.649855 |
| H  | 0.354515  | 1.849430  | -2.864799 |
| O  | -1.128337 | 1.206688  | 2.594277  |
| C  | -1.710505 | 2.532993  | 2.434893  |
| H  | -2.496308 | 2.491043  | 1.675962  |
| H  | -2.108224 | 2.851620  | 3.403412  |
| H  | -0.899964 | 3.196632  | 2.130444  |
| C  | -2.098750 | 0.221998  | 3.046172  |
| H  | -1.570055 | -0.728874 | 3.127626  |
| H  | -2.468293 | 0.528838  | 4.029712  |
| H  | -2.913205 | 0.161182  | 2.319473  |
| C  | -2.076999 | 3.030513  | -2.729071 |
| H  | -3.145715 | 3.183838  | -2.543538 |
| H  | -1.586443 | 4.010205  | -2.778216 |
| H  | -1.963316 | 2.531049  | -3.697910 |
| H  | 0.729527  | 2.315747  | -1.162369 |

Electronic Energy = -1494.63850993 (Hartree/Particle)  
 Dipole Moment (Debye): 6.7992  
 index 0  
 Harmonic frequencies  
 Number of imaginary frequencies= 0

# THERMOCHEMICAL DATA

Temperature 298.150 Kelvin. Pressure 1.00000 Atm.  
 Zero-point correction= 0.445809  
 (Hartree/Particle)  
 Thermal correction to Energy= 0.475584  
 Thermal correction to Enthalpy= 0.476528  
 Thermal correction to Gibbs Free Energy= 0.384442  
 Sum of electronic and zero-point Energies= -1494.192701  
 Sum of electronic and thermal Energies= -1494.162926  
 Sum of electronic and thermal Enthalpies= -1494.161982  
 Sum of electronic and thermal Free Energies= -1494.254068  
 PCM-SP (solvent=THF;6-311+g(2d,p)) = -1495.01084685  
 Corrected Free Energy = -1494.62640492

PATH: MARKOVNIKOV

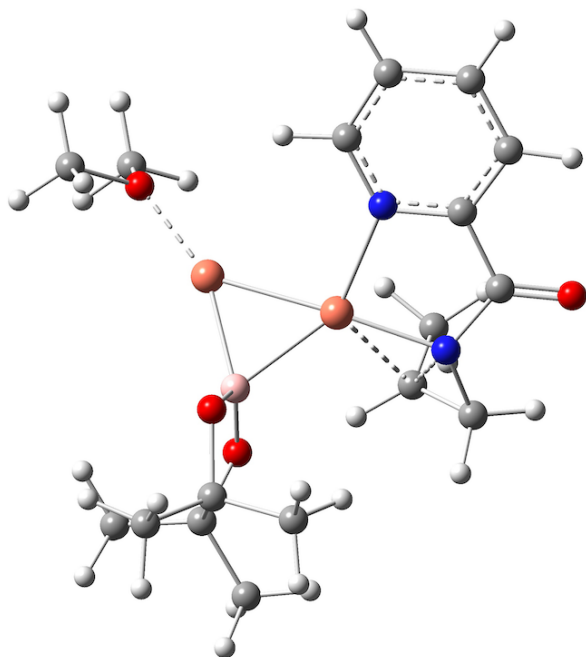

TS6 Substrate: N-(2-picolinoyl)-methyl aziridine  
 Path: markovnikov

## CARTESIAN COORDINATES

|   |           |           |           |
|---|-----------|-----------|-----------|
| C | -0.207839 | -1.111433 | 2.371665  |
| N | -1.256211 | -1.980627 | 0.910721  |
| C | -2.640289 | -1.948111 | 0.759195  |
| O | -3.432390 | -2.569946 | 1.455146  |
| C | -0.735294 | -2.488354 | 2.172693  |
| C | -3.104664 | -1.122357 | -0.417849 |
| C | -4.402095 | -1.243019 | -0.912000 |

|    |           |           |           |
|----|-----------|-----------|-----------|
| C  | -4.769734 | -0.458747 | -2.008001 |
| C  | -3.835881 | 0.422796  | -2.559042 |
| C  | -2.564921 | 0.497990  | -1.986265 |
| N  | -2.210552 | -0.261058 | -0.940778 |
| Cu | 0.437545  | 1.820116  | 0.175225  |
| H  | -5.086838 | -1.937735 | -0.437564 |
| H  | -5.768660 | -0.535792 | -2.427154 |
| H  | -1.798579 | 1.164872  | -2.371501 |
| H  | -4.081311 | 1.039468  | -3.417809 |
| H  | -1.510656 | -2.810036 | 2.872385  |
| H  | 0.019425  | -3.264003 | 2.028047  |
| Cu | -0.460280 | -0.358051 | 0.193814  |
| B  | 1.575895  | 0.185087  | -0.221178 |
| O  | 2.542670  | -0.164502 | 0.694833  |
| O  | 1.833476  | -0.288448 | -1.483571 |
| C  | 3.654995  | -0.781104 | -0.052551 |
| C  | 2.937527  | -1.258266 | -1.366179 |
| H  | 0.853032  | -0.935684 | 2.203752  |
| C  | -0.978055 | -0.109178 | 3.165886  |
| H  | -0.699108 | -0.246028 | 4.224384  |
| H  | -0.733493 | 0.919644  | 2.885710  |
| C  | 2.273567  | -2.633656 | -1.236696 |
| H  | 1.638340  | -2.806184 | -2.110595 |
| H  | 3.018330  | -3.434107 | -1.186005 |
| H  | 1.638166  | -2.686288 | -0.345726 |
| C  | 3.786544  | -1.185293 | -2.628915 |
| H  | 4.664277  | -1.834910 | -2.534957 |
| H  | 3.201488  | -1.525749 | -3.488801 |
| H  | 4.125484  | -0.166975 | -2.831192 |
| C  | 4.687211  | 0.325900  | -0.284997 |
| H  | 4.990293  | 0.740782  | 0.681247  |
| H  | 5.578394  | -0.062798 | -0.787953 |
| H  | 4.271361  | 1.136990  | -0.891581 |
| C  | 4.244722  | -1.897115 | 0.801391  |
| H  | 5.016449  | -2.437982 | 0.242075  |
| H  | 4.708840  | -1.473358 | 1.697552  |
| H  | 3.481829  | -2.612436 | 1.118139  |
| H  | -2.058352 | -0.265877 | 3.090474  |
| O  | -0.167776 | 3.669906  | 0.538758  |
| C  | -1.235795 | 4.254974  | -0.233158 |
| H  | -0.826514 | 4.800894  | -1.090949 |
| H  | -1.865066 | 3.431499  | -0.575153 |
| H  | -1.818698 | 4.929383  | 0.403447  |
| C  | 0.728137  | 4.642986  | 1.118499  |
| H  | 0.162030  | 5.311173  | 1.776202  |
| H  | 1.467053  | 4.087178  | 1.697643  |
| H  | 1.223030  | 5.216378  | 0.326624  |

Electronic Energy = -1494.63033337 (Hartree/Particle)

Dipole Moment (Debye): 6.6498

index 1

Number of imaginary frequencies= 1

Negatives Eigenvalues: -149.298

#### THERMOCHEMICAL DATA

Temperature 298.150 Kelvin. Pressure 1.00000 Atm.

Zero-point correction= 0.443409  
(Hartree/Particle)

Thermal correction to Energy= 0.474038

|                                              |                |
|----------------------------------------------|----------------|
| Thermal correction to Enthalpy=              | 0.474982       |
| Thermal correction to Gibbs Free Energy=     | 0.377125       |
| Sum of electronic and zero-point Energies=   | -1494.186925   |
| Sum of electronic and thermal Energies=      | -1494.156296   |
| Sum of electronic and thermal Enthalpies=    | -1494.155351   |
| Sum of electronic and thermal Free Energies= | -1494.253208   |
| PCM-SP (solvent=THF;6-311+g(2d,p)) =         | -1495.00034032 |
| Corrected Free Energy =                      | -1494.62321195 |

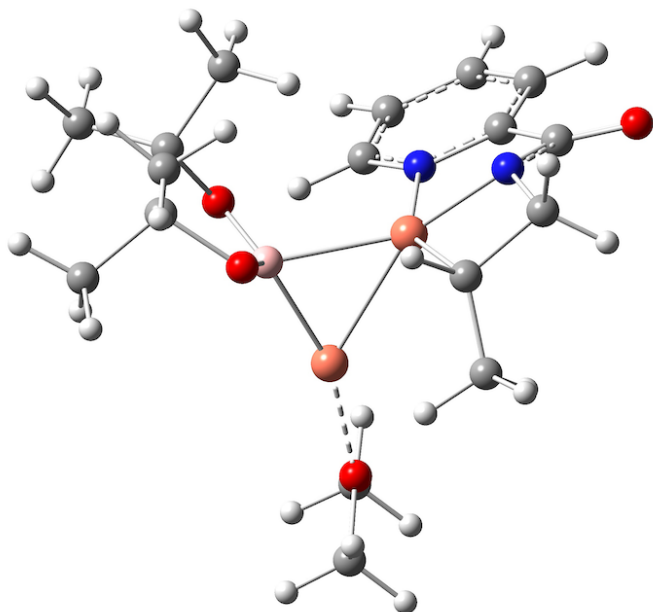

I4                      Substrate: N-(2-picolinoyl)-methyl aziridine  
                             Path: markovnikov

#### CARTESIAN COORDINATES

|    |           |           |           |
|----|-----------|-----------|-----------|
| C  | -0.357889 | 0.490724  | 2.648771  |
| N  | -1.809593 | -0.875464 | 1.805430  |
| C  | -3.039872 | -1.069525 | 1.238066  |
| O  | -4.100541 | -1.151938 | 1.844122  |
| C  | -1.574261 | -0.302065 | 3.117428  |
| C  | -2.934576 | -1.236452 | -0.266082 |
| C  | -3.978053 | -1.742480 | -1.033700 |
| C  | -3.781757 | -1.878209 | -2.411055 |
| C  | -2.556353 | -1.501981 | -2.969169 |
| C  | -1.564841 | -0.985581 | -2.133491 |
| N  | -1.762154 | -0.854831 | -0.814331 |
| Cu | 0.484806  | 1.747456  | -0.420414 |
| H  | -4.906384 | -2.018050 | -0.544085 |
| H  | -4.571933 | -2.277743 | -3.040103 |
| H  | -0.585071 | -0.690279 | -2.495722 |
| H  | -2.365706 | -1.608013 | -4.032304 |
| H  | -2.404575 | 0.327787  | 3.459406  |
| H  | -1.360878 | -1.056073 | 3.883533  |
| Cu | -0.585827 | -0.066793 | 0.673700  |
| B  | 1.469040  | 0.009017  | -0.128314 |
| O  | 2.430936  | -0.111671 | 0.836529  |

|   |           |           |           |
|---|-----------|-----------|-----------|
| O | 1.579317  | -0.912136 | -1.138298 |
| C | 3.413238  | -1.103945 | 0.351664  |
| C | 2.563683  | -1.919743 | -0.689027 |
| H | 0.612248  | 0.025605  | 2.829238  |
| C | -0.399096 | 1.990898  | 2.748313  |
| H | -1.301183 | 2.409965  | 2.288970  |
| H | -0.425101 | 2.266180  | 3.815878  |
| C | 1.740045  | -3.047697 | -0.058957 |
| H | 1.035787  | -3.433872 | -0.802031 |
| H | 2.379901  | -3.871827 | 0.271309  |
| H | 1.161179  | -2.688516 | 0.799227  |
| C | 3.335576  | -2.421652 | -1.901717 |
| H | 4.130810  | -3.107130 | -1.587661 |
| H | 2.662812  | -2.967337 | -2.570721 |
| H | 3.784953  | -1.601077 | -2.465225 |
| C | 4.556465  | -0.305746 | -0.280413 |
| H | 4.965709  | 0.383546  | 0.464318  |
| H | 5.361175  | -0.967438 | -0.616185 |
| H | 4.208565  | 0.281368  | -1.136670 |
| C | 3.909262  | -1.906942 | 1.547605  |
| H | 4.571820  | -2.714005 | 1.215011  |
| H | 4.476926  | -1.257141 | 2.220759  |
| H | 3.083867  | -2.345585 | 2.113007  |
| H | 0.484272  | 2.454017  | 2.298235  |
| O | 0.021816  | 3.576142  | -0.971194 |
| C | -0.639535 | 3.844954  | -2.226717 |
| H | -1.402509 | 4.616094  | -2.076981 |
| H | 0.093408  | 4.171816  | -2.972489 |
| H | -1.109496 | 2.912777  | -2.543604 |
| C | 0.659228  | 4.735891  | -0.391944 |
| H | 1.444747  | 5.103322  | -1.061239 |
| H | -0.091624 | 5.514128  | -0.219567 |
| H | 1.093114  | 4.419371  | 0.557556  |

Electronic Energy = -1494.63510643 (Hartree/Particle)

Dipole Moment (Debye): 7.3136

index 0

Harmonic frequencies

Number of imaginary frequencies= 0

#### THERMOCHEMICAL DATA

Temperature 298.150 Kelvin. Pressure 1.00000 Atm.

Zero-point correction= 0.444520

(Hartree/Particle)

Thermal correction to Energy= 0.475391

Thermal correction to Enthalpy= 0.476335

Thermal correction to Gibbs Free Energy= 0.378135

Sum of electronic and zero-point Energies= -1494.190586

Sum of electronic and thermal Energies= -1494.159715

Sum of electronic and thermal Enthalpies= -1494.158771

Sum of electronic and thermal Free Energies= -1494.256972

PCM-SP (solvent=THF;6-311+g(2d,p)) = -1495.00722031

Corrected Free Energy = -1494.62908588

-----

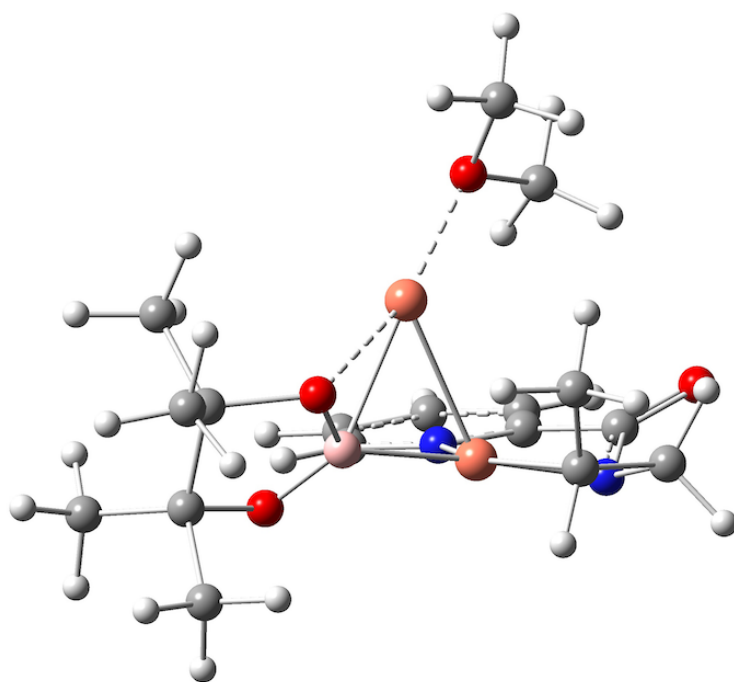

TS7                      Substrate: N-(2-picolinoyl)-methyl aziridine  
Path: markovnikov

#### CARTESIAN COORDINATES

|    |           |           |           |
|----|-----------|-----------|-----------|
| N  | -1.591252 | 1.537604  | -0.111311 |
| C  | -2.915977 | 1.277911  | -0.037970 |
| C  | -3.849470 | 2.030045  | -0.742960 |
| C  | -3.394139 | 3.103632  | -1.513588 |
| C  | -2.023728 | 3.376030  | -1.569155 |
| C  | -1.144791 | 2.557762  | -0.859103 |
| C  | -3.297987 | 0.082106  | 0.823876  |
| O  | -4.362111 | -0.516763 | 0.670703  |
| Cu | -0.607052 | 0.125341  | 0.986720  |
| N  | -2.302648 | -0.200995 | 1.700358  |
| C  | -2.101730 | -1.487937 | 2.354725  |
| C  | -0.573848 | -1.510556 | 2.218384  |
| B  | 1.354694  | 0.277164  | 0.428169  |
| Cu | 0.413875  | -1.317192 | -0.729786 |
| O  | 2.276754  | -0.739005 | 0.161304  |
| C  | 3.511188  | -0.086433 | -0.374204 |
| C  | 4.712858  | -0.884832 | 0.108310  |
| O  | 1.905767  | 1.516272  | 0.338504  |
| C  | 3.374811  | 1.356516  | 0.227484  |
| C  | 3.930458  | 1.484012  | 1.647769  |
| C  | 3.387197  | -0.139685 | -1.897509 |
| C  | 3.904895  | 2.470608  | -0.666192 |
| H  | -4.899163 | 1.764239  | -0.671618 |
| H  | -4.098613 | 3.721605  | -2.062871 |
| H  | -0.069253 | 2.706705  | -0.864758 |
| H  | -1.637410 | 4.206010  | -2.151900 |
| H  | 4.274522  | 0.276168  | -2.383904 |
| H  | 3.286102  | -1.184198 | -2.211440 |
| H  | 2.508560  | 0.415148  | -2.245277 |
| H  | 4.711556  | -1.878395 | -0.350549 |
| H  | 5.640502  | -0.378260 | -0.180934 |

|   |           |           |           |
|---|-----------|-----------|-----------|
| H | 4.708274  | -1.009937 | 1.192759  |
| H | 3.759632  | 3.437034  | -0.174486 |
| H | 4.978128  | 2.337552  | -0.843458 |
| H | 3.392634  | 2.499216  | -1.630719 |
| H | 5.024058  | 1.438984  | 1.649942  |
| H | 3.624021  | 2.447746  | 2.064450  |
| H | 3.547894  | 0.693862  | 2.302012  |
| O | -0.757111 | -2.426913 | -1.819069 |
| C | -0.381420 | -2.849147 | -3.148787 |
| H | -0.648082 | -2.075912 | -3.878157 |
| H | 0.697965  | -3.005530 | -3.138598 |
| H | -0.892338 | -3.787989 | -3.385964 |
| C | -2.186526 | -2.247252 | -1.652459 |
| H | -2.698202 | -3.177263 | -1.918286 |
| H | -2.361374 | -2.013830 | -0.603352 |
| H | -2.536236 | -1.422409 | -2.282299 |
| H | -2.603761 | -2.310758 | 1.829976  |
| H | -0.166766 | -2.356778 | 1.661201  |
| C | 0.240912  | -1.126482 | 3.429535  |
| H | 0.133938  | -1.918913 | 4.188091  |
| H | 1.304019  | -1.022386 | 3.194680  |
| H | -0.117220 | -0.195341 | 3.880580  |
| H | -2.440048 | -1.491288 | 3.399123  |

Electronic Energy = -1494.62566448 (Hartree/Particle)

Dipole Moment (Debye): 6.8825

index 0

Harmonic frequencies

Number of imaginary frequencies= 1

Negatives Eigenvalues: -59.462

#### THERMOCHEMICAL DATA

Temperature 298.150 Kelvin. Pressure 1.00000 Atm.

Zero-point correction= 0.444587  
(Hartree/Particle)

Thermal correction to Energy= 0.474370

Thermal correction to Enthalpy= 0.475314

Thermal correction to Gibbs Free Energy= 0.381934

Sum of electronic and zero-point Energies= -1494.181077

Sum of electronic and thermal Energies= -1494.151295

Sum of electronic and thermal Enthalpies= -1494.150351

Sum of electronic and thermal Free Energies= -1494.243731

PCM-SP (solvent=THF;6-311+g(2d,p)) = -1494.99785619

Corrected Free Energy = -1494.61592271

-----

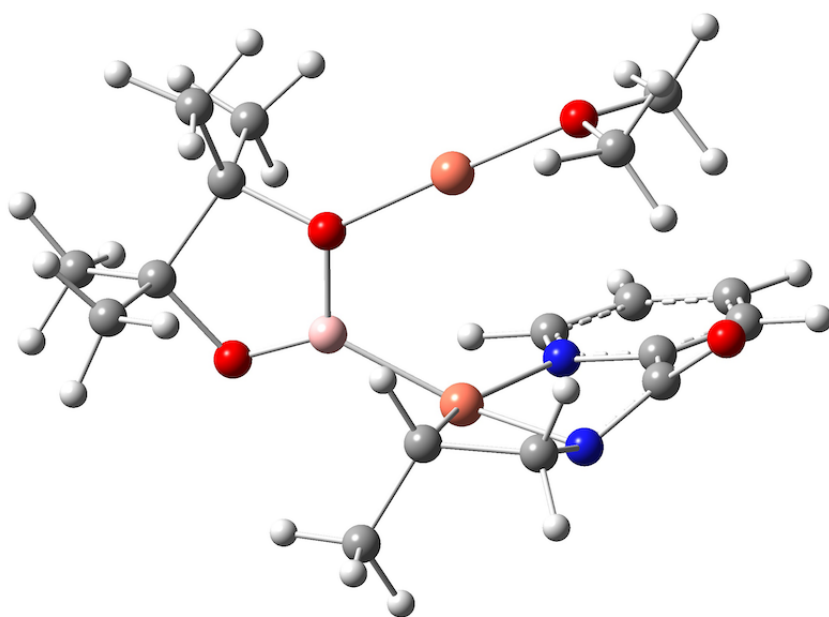

I5 Substrate: N-(2-picolinoyl)-methyl aziridine  
Path: markovnikov

#### CARTESIAN COORDINATES

|    |           |           |           |
|----|-----------|-----------|-----------|
| N  | 1.627319  | 1.413291  | 0.948592  |
| C  | 2.809399  | 0.923798  | 0.502038  |
| C  | 3.916954  | 0.813098  | 1.337781  |
| C  | 3.809360  | 1.259183  | 2.657036  |
| C  | 2.589732  | 1.774491  | 3.107582  |
| C  | 1.514402  | 1.824378  | 2.221765  |
| C  | 2.801745  | 0.434396  | -0.942610 |
| O  | 3.526810  | -0.515149 | -1.282304 |
| Cu | 0.318347  | 1.318076  | -0.611509 |
| N  | 1.888566  | 1.109135  | -1.659743 |
| C  | 1.233792  | 0.552823  | -2.847430 |
| C  | -0.239100 | 0.828294  | -2.473132 |
| B  | -1.482074 | 0.846121  | -0.018148 |
| Cu | -0.185738 | -1.702856 | 0.099528  |
| O  | -1.671105 | -0.546841 | 0.234083  |
| C  | -2.999604 | -0.730145 | 0.911462  |
| C  | -3.583639 | -2.056304 | 0.452871  |
| O  | -2.633252 | 1.513691  | 0.203163  |
| C  | -3.738346 | 0.554249  | 0.400583  |
| C  | -4.396175 | 0.373366  | -0.969732 |
| C  | -2.708214 | -0.735204 | 2.410394  |
| C  | -4.717401 | 1.153968  | 1.401721  |
| H  | 4.834301  | 0.392156  | 0.939136  |
| H  | 4.663713  | 1.207806  | 3.325964  |
| H  | 0.541075  | 2.202804  | 2.518669  |
| H  | 2.469266  | 2.132541  | 4.124852  |
| H  | 1.528361  | 1.074953  | -3.767162 |
| H  | -3.623204 | -0.904972 | 2.985617  |
| H  | -2.007699 | -1.545968 | 2.640064  |
| H  | -2.262130 | 0.209543  | 2.734962  |
| H  | -2.974254 | -2.884938 | 0.831389  |

|   |           |           |           |
|---|-----------|-----------|-----------|
| H | -4.596449 | -2.178500 | 0.851411  |
| H | -3.628030 | -2.128637 | -0.635767 |
| H | -5.180854 | 2.045238  | 0.969204  |
| H | -5.511567 | 0.436373  | 1.636952  |
| H | -4.221684 | 1.447823  | 2.329420  |
| H | -5.273291 | -0.278411 | -0.907222 |
| H | -4.719265 | 1.351043  | -1.338018 |
| H | -3.696641 | -0.049597 | -1.698702 |
| H | 1.453059  | -0.514812 | -2.974850 |
| O | 1.313575  | -2.839247 | -0.081794 |
| C | 1.746176  | -3.267299 | -1.405794 |
| H | 2.457277  | -2.538571 | -1.804251 |
| H | 2.201338  | -4.258378 | -1.314443 |
| H | 0.849405  | -3.327285 | -2.024168 |
| C | 2.412684  | -2.766437 | 0.867854  |
| H | 1.990764  | -2.426442 | 1.814732  |
| H | 2.833451  | -3.770048 | 0.985246  |
| H | 3.163312  | -2.064810 | 0.494764  |
| H | -0.873195 | -0.061969 | -2.474843 |
| C | -0.886963 | 2.030090  | -3.127885 |
| H | -1.011968 | 1.829757  | -4.203449 |
| H | -1.869725 | 2.252060  | -2.702218 |
| H | -0.258885 | 2.922188  | -3.033276 |

Electronic Energy = -1494.63626144 (Hartree/Particle)

Dipole Moment (Debye): 6.3941

index 0

Harmonic frequencies

Number of imaginary frequencies= 0

#### THERMOCHEMICAL DATA

Temperature 298.150 Kelvin. Pressure 1.00000 Atm.

Zero-point correction= 0.446040

(Hartree/Particle)

Thermal correction to Energy= 0.475915

Thermal correction to Enthalpy= 0.476860

Thermal correction to Gibbs Free Energy= 0.384339

Sum of electronic and zero-point Energies= -1494.190221

Sum of electronic and thermal Energies= -1494.160346

Sum of electronic and thermal Enthalpies= -1494.159402

Sum of electronic and thermal Free Energies= -1494.251923

PCM-SP (solvent=THF;6-311+g(2d,p)) = -1495.00833143

Corrected Free Energy = -1494.62399296

-----  
-----

MODEL: [Az-(Cu)2-Bpin] +

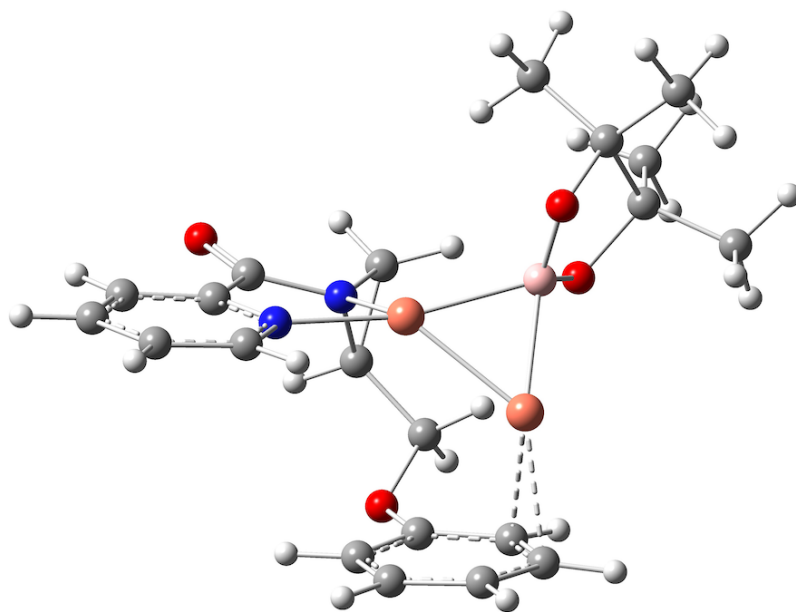

SUBSTRATE: 1c

Complex-4

Substrate: 1c

#### CARTESIAN COORDINATES

|    |           |           |           |
|----|-----------|-----------|-----------|
| C  | -0.752006 | -0.888987 | 2.640171  |
| N  | -0.723731 | -1.508100 | 1.256852  |
| C  | -1.831681 | -2.383315 | 0.993373  |
| O  | -2.083445 | -3.375334 | 1.643643  |
| C  | 0.227233  | -1.943225 | 2.309504  |
| C  | -2.664487 | -1.962356 | -0.183873 |
| C  | -3.893055 | -2.580490 | -0.416932 |
| C  | -4.649106 | -2.172392 | -1.517892 |
| C  | -4.145894 | -1.169037 | -2.347536 |
| C  | -2.901776 | -0.608245 | -2.050518 |
| N  | -2.174349 | -0.992845 | -0.990466 |
| Cu | 0.535840  | 1.854037  | -0.589879 |
| H  | -4.229995 | -3.359860 | 0.257974  |
| H  | -5.610827 | -2.632135 | -1.724887 |
| H  | -2.461207 | 0.165344  | -2.670810 |
| H  | -4.697968 | -0.826064 | -3.216699 |
| H  | 0.069069  | -2.936844 | 2.719276  |
| H  | 1.247587  | -1.650900 | 2.078128  |
| H  | -1.614743 | -1.190585 | 3.231554  |
| C  | -0.371901 | 0.564190  | 2.739267  |
| H  | -0.094320 | 0.801741  | 3.772332  |
| H  | 0.475554  | 0.771198  | 2.079813  |
| O  | -1.524208 | 1.354828  | 2.384622  |
| C  | -1.426943 | 2.256444  | 1.369414  |
| C  | -2.537511 | 2.394180  | 0.527561  |
| C  | -0.271907 | 3.039374  | 1.142745  |
| C  | -2.481158 | 3.247135  | -0.578666 |
| H  | -3.422383 | 1.802133  | 0.738083  |
| C  | -0.219733 | 3.890552  | 0.012176  |
| H  | 0.540671  | 3.038307  | 1.863101  |
| C  | -1.320968 | 3.976376  | -0.862607 |

|    |           |           |           |
|----|-----------|-----------|-----------|
| H  | -3.345711 | 3.332332  | -1.230633 |
| H  | 0.637822  | 4.545979  | -0.122159 |
| H  | -1.276081 | 4.631672  | -1.726204 |
| Cu | -0.326354 | -0.308026 | -0.534819 |
| B  | 1.707464  | 0.122023  | -0.577131 |
| O  | 2.435831  | 0.037622  | 0.601424  |
| O  | 2.360311  | -0.455787 | -1.636602 |
| C  | 3.785269  | -0.440057 | 0.249650  |
| C  | 3.517451  | -1.189166 | -1.103190 |
| C  | 4.659328  | 0.808726  | 0.095346  |
| H  | 4.631539  | 1.382638  | 1.026995  |
| H  | 5.700233  | 0.542269  | -0.113692 |
| H  | 4.295447  | 1.449783  | -0.714124 |
| C  | 4.303181  | -1.316873 | 1.383729  |
| H  | 5.278195  | -1.742281 | 1.120707  |
| H  | 4.429631  | -0.716265 | 2.290366  |
| H  | 3.621984  | -2.140654 | 1.610474  |
| C  | 4.651765  | -1.113760 | -2.118206 |
| H  | 5.559076  | -1.575247 | -1.711644 |
| H  | 4.371650  | -1.655056 | -3.027076 |
| H  | 4.877831  | -0.081999 | -2.395900 |
| C  | 3.054554  | -2.638808 | -0.916649 |
| H  | 2.692911  | -3.022416 | -1.875331 |
| H  | 3.873152  | -3.279875 | -0.574152 |
| H  | 2.233188  | -2.703259 | -0.194178 |

Electronic Energy = -1645.88840862 (Hartree/Particle)

Dipole Moment (Debye): 3.6725

index 0

Harmonic frequencies

Number of imaginary frequencies= 0

#### THERMOCHEMICAL DATA

Temperature 298.150 Kelvin. Pressure 1.00000 Atm.

Zero-point correction= 0.449779

(Hartree/Particle)

Thermal correction to Energy= 0.479705

Thermal correction to Enthalpy= 0.480649

Thermal correction to Gibbs Free Energy= 0.387147

Sum of electronic and zero-point Energies= -1645.438629

Sum of electronic and thermal Energies= -1645.408704

Sum of electronic and thermal Enthalpies= -1645.407759

Sum of electronic and thermal Free Energies= -1645.501262

PCM-SP (solvent=THF;6-311+g(2d,p)) = -1646.28883721

Corrected Free Energy = -1645.90169059

-----  
PATH: ANTI\_MARKOVNIKOV

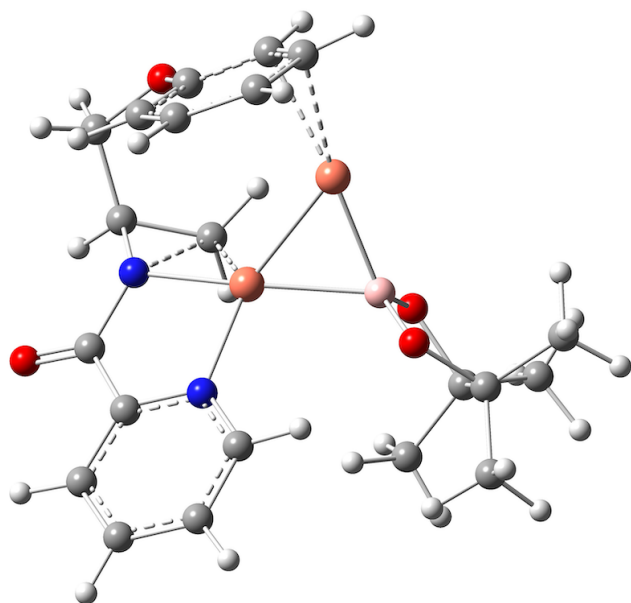

TS8

Substrate: 1c

Path: anti-markovnikov

#### CARTESIAN COORDINATES

|    |           |           |           |
|----|-----------|-----------|-----------|
| C  | -1.277074 | 0.149042  | 2.278648  |
| N  | -1.854696 | 1.299599  | 0.810837  |
| C  | -1.640396 | 2.680957  | 0.672199  |
| O  | -2.326525 | 3.523218  | 1.229023  |
| C  | -2.567346 | 0.835535  | 1.989605  |
| C  | -0.548881 | 3.036966  | -0.303171 |
| C  | -0.360611 | 4.350409  | -0.725053 |
| C  | 0.675869  | 4.612387  | -1.626511 |
| C  | 1.485642  | 3.559950  | -2.058088 |
| C  | 1.240543  | 2.272662  | -1.570855 |
| N  | 0.239217  | 2.024814  | -0.717163 |
| Cu | -0.325657 | -1.971591 | -0.458528 |
| H  | -1.011819 | 5.130347  | -0.344861 |
| H  | 0.848500  | 5.623455  | -1.983365 |
| H  | 1.843507  | 1.413943  | -1.850620 |
| H  | 2.296981  | 3.725459  | -2.759752 |
| H  | -2.832336 | 1.652986  | 2.667214  |
| H  | -0.530535 | 0.681534  | 2.859852  |
| Cu | -0.321519 | 0.272325  | 0.252444  |
| B  | 1.417622  | -0.983334 | 0.079124  |
| O  | 2.369566  | -0.759766 | -0.889861 |
| O  | 1.955733  | -1.056744 | 1.344820  |
| C  | 3.692109  | -0.907189 | -0.256103 |
| C  | 3.363276  | -0.633654 | 1.254940  |
| H  | -1.199309 | -0.931678 | 2.218539  |
| C  | -3.796407 | -0.040742 | 1.730080  |
| H  | -4.320224 | -0.206185 | 2.674236  |
| H  | -4.482345 | 0.463891  | 1.041589  |
| O  | -3.470203 | -1.365789 | 1.286235  |
| C  | -3.086709 | -1.632951 | 0.008661  |
| C  | -2.390104 | -2.855323 | -0.153411 |
| C  | -3.327754 | -0.818266 | -1.104073 |
| C  | -1.907129 | -3.227485 | -1.426612 |
| H  | -2.300850 | -3.519888 | 0.701404  |

|   |           |           |           |
|---|-----------|-----------|-----------|
| C | -2.838197 | -1.195802 | -2.361604 |
| H | -3.857996 | 0.119762  | -0.997592 |
| C | -2.114142 | -2.378107 | -2.534592 |
| H | -1.445542 | -4.203187 | -1.561062 |
| H | -3.021181 | -0.546662 | -3.212803 |
| H | -1.738013 | -2.659272 | -3.512433 |
| C | 4.181533  | -1.444821 | 2.252135  |
| H | 5.247532  | -1.211882 | 2.149109  |
| H | 3.876050  | -1.195563 | 3.273137  |
| H | 4.043620  | -2.518775 | 2.110262  |
| C | 3.378995  | 0.853969  | 1.625747  |
| H | 2.954352  | 0.975687  | 2.627192  |
| H | 4.397967  | 1.253534  | 1.634701  |
| H | 2.777604  | 1.444122  | 0.925928  |
| C | 4.147135  | -2.342874 | -0.534891 |
| H | 4.159273  | -2.510012 | -1.616219 |
| H | 5.154456  | -2.522979 | -0.146049 |
| H | 3.464687  | -3.070925 | -0.084677 |
| C | 4.647825  | 0.091704  | -0.898940 |
| H | 5.623053  | 0.062140  | -0.400064 |
| H | 4.797838  | -0.165010 | -1.952411 |
| H | 4.265452  | 1.114095  | -0.846585 |

Electronic Energy = -1645.85590322 (Hartree/Particle)  
Dipole Moment (Debye): 2.0153  
index 1  
Number of imaginary frequencies= 1  
Negatives Eigenvalues: -217.650

# THERMOCHEMICAL DATA

Temperature 298.150 Kelvin. Pressure 1.00000 Atm.  
Zero-point correction= 0.448034  
(Hartree/Particle)  
Thermal correction to Energy= 0.477323  
Thermal correction to Enthalpy= 0.478267  
Thermal correction to Gibbs Free Energy= 0.387322  
Sum of electronic and zero-point Energies= -1645.407869  
Sum of electronic and thermal Energies= -1645.378580  
Sum of electronic and thermal Enthalpies= -1645.377636  
Sum of electronic and thermal Free Energies= -1645.468581  
PCM-SP (solvent=THF;6-311+g(2d,p)) = -1646.25760073  
Corrected Free Energy = -1645.87027851

-----

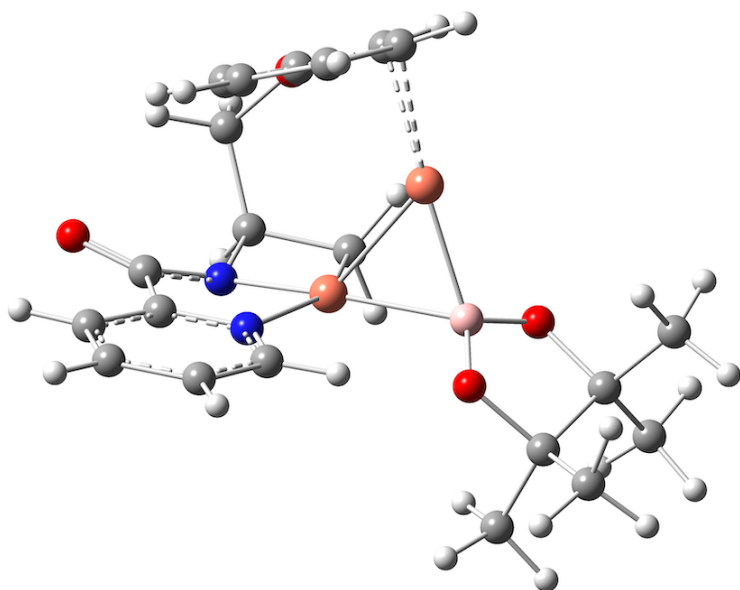

I6 Substrate: 1c  
Path: anti-markovnikov

# CARTESIAN COORDINATES

|    |           |           |           |
|----|-----------|-----------|-----------|
| C  | 1.767079  | -0.951000 | 3.032536  |
| C  | 1.035503  | -2.092204 | 2.639836  |
| C  | 1.279393  | -2.688790 | 1.379925  |
| C  | 2.260972  | -2.136945 | 0.513205  |
| C  | 3.030585  | -1.048557 | 0.945850  |
| C  | 2.770333  | -0.462663 | 2.190903  |
| O  | 2.378861  | -2.754096 | -0.684820 |
| C  | 2.822173  | -2.055014 | -1.870897 |
| C  | 1.763436  | -1.090717 | -2.453697 |
| Cu | 0.170367  | 0.141797  | -0.811250 |
| B  | -1.807140 | -0.184354 | 0.018670  |
| O  | -2.684467 | -1.087722 | -0.509987 |
| C  | -4.046551 | -0.559165 | -0.277293 |
| C  | -3.775387 | 0.981531  | -0.118490 |
| O  | -2.386633 | 0.996511  | 0.398479  |
| Cu | -0.285272 | -1.174645 | 1.080928  |
| C  | 0.314629  | -1.427363 | -2.074194 |
| N  | 1.691249  | 0.238478  | -1.860256 |
| C  | 2.672767  | 1.056243  | -1.411480 |
| C  | 2.119501  | 2.087336  | -0.445807 |
| C  | 2.866378  | 3.177242  | -0.016027 |
| C  | 2.288624  | 4.059134  | 0.902671  |
| C  | 0.992126  | 3.814664  | 1.362490  |
| C  | 0.307616  | 2.691684  | 0.894437  |
| N  | 0.868678  | 1.853600  | 0.010148  |
| O  | 3.868475  | 0.988837  | -1.692129 |
| H  | 3.871122  | 3.309830  | -0.404314 |
| H  | 2.842200  | 4.925219  | 1.253689  |
| H  | -0.701835 | 2.444774  | 1.205125  |
| H  | 0.511377  | 4.479487  | 2.072767  |
| H  | 1.934322  | -1.042479 | -3.537944 |
| H  | -0.442975 | -1.179274 | -2.817603 |
| H  | 0.118615  | -2.348443 | -1.532926 |
| H  | 2.994650  | -2.865416 | -2.581233 |
| H  | 3.766527  | -1.531671 | -1.703063 |

|   |           |           |           |
|---|-----------|-----------|-----------|
| H | 0.799458  | -3.621063 | 1.091303  |
| H | 3.811300  | -0.642354 | 0.313052  |
| H | 0.348815  | -2.570083 | 3.335379  |
| H | 3.365438  | 0.391543  | 2.501049  |
| H | 1.577694  | -0.489587 | 3.995960  |
| C | -4.550461 | -1.229791 | 1.003774  |
| H | -5.582454 | -0.938397 | 1.222623  |
| H | -4.519541 | -2.315792 | 0.874443  |
| H | -3.925696 | -0.968544 | 1.864552  |
| C | -4.918299 | -0.941210 | -1.466719 |
| H | -5.040434 | -2.027965 | -1.502393 |
| H | -5.912040 | -0.489837 | -1.368287 |
| H | -4.480354 | -0.617123 | -2.413264 |
| C | -4.670887 | 1.694902  | 0.885752  |
| H | -4.406125 | 2.755875  | 0.932480  |
| H | -5.719499 | 1.621305  | 0.576343  |
| H | -4.573438 | 1.274041  | 1.888848  |
| C | -3.735141 | 1.739381  | -1.448354 |
| H | -4.735500 | 1.826295  | -1.883659 |
| H | -3.346474 | 2.747583  | -1.275561 |
| H | -3.082939 | 1.241458  | -2.173510 |

Electronic Energy = -1645.86109934 (Hartree/Particle)

Dipole Moment (Debye): 4.5232

index 0

Harmonic frequencies

Number of imaginary frequencies= 0

#### THERMOCHEMICAL DATA

Temperature 298.150 Kelvin. Pressure 1.00000 Atm.

Zero-point correction= 0.449619

(Hartree/Particle)

Thermal correction to Energy= 0.478914

Thermal correction to Enthalpy= 0.479858

Thermal correction to Gibbs Free Energy= 0.389413

Sum of electronic and zero-point Energies= -1645.411480

Sum of electronic and thermal Energies= -1645.382185

Sum of electronic and thermal Enthalpies= -1645.381241

Sum of electronic and thermal Free Energies= -1645.471686

PCM-SP (solvent=THF;6-311+g(2d,p)) = -1646.26400759

Corrected Free Energy = -1645.87459425

-----

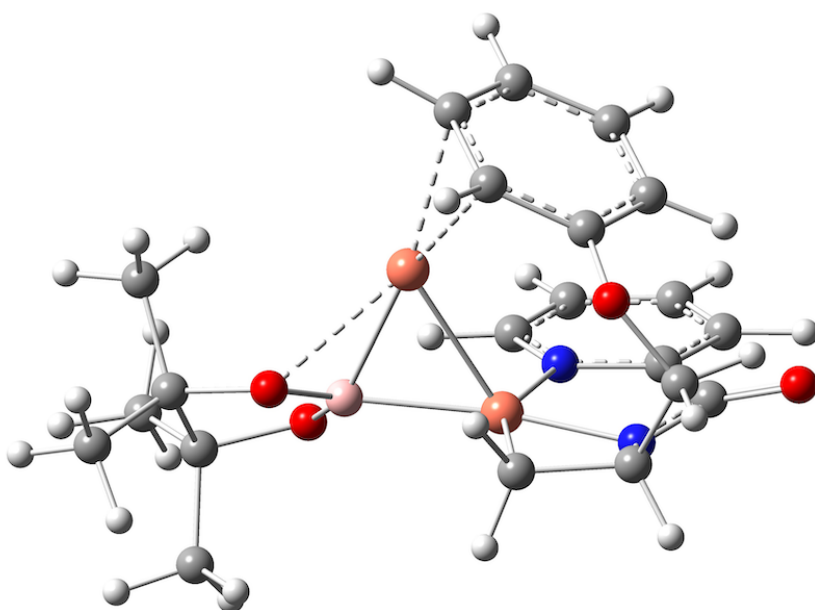

TS9                      Substrate: 1c  
                              Path: anti-markovnikov

# CARTESIAN COORDINATES

|    |           |           |           |
|----|-----------|-----------|-----------|
| N  | 0.980383  | 1.907399  | 0.001226  |
| C  | 2.304504  | 2.038867  | -0.242523 |
| C  | 3.053556  | 3.066137  | 0.317922  |
| C  | 2.405402  | 3.994029  | 1.138924  |
| C  | 1.034843  | 3.858486  | 1.374067  |
| C  | 0.350477  | 2.792986  | 0.787385  |
| C  | 2.926147  | 0.973514  | -1.131166 |
| O  | 4.144960  | 0.824751  | -1.225917 |
| Cu | 0.277715  | 0.268838  | -0.951907 |
| N  | 1.961026  | 0.238917  | -1.720737 |
| C  | 1.996916  | -1.063031 | -2.370089 |
| C  | 0.483799  | -1.298119 | -2.212571 |
| C  | 2.895454  | -2.139040 | -1.720988 |
| O  | 2.261450  | -2.842107 | -0.627205 |
| C  | 2.039887  | -2.251971 | 0.568403  |
| C  | 0.921635  | -2.756060 | 1.288990  |
| C  | 0.562179  | -2.170591 | 2.528919  |
| C  | 1.315476  | -1.096006 | 3.045358  |
| C  | 2.450787  | -0.664890 | 2.352772  |
| C  | 2.824267  | -1.235878 | 1.130724  |
| Cu | -0.473932 | -1.193648 | 0.804863  |
| O  | -2.572137 | -1.002215 | -0.359773 |
| C  | -3.916106 | -0.494263 | 0.025031  |
| C  | -4.964483 | -1.311508 | -0.716740 |
| B  | -1.722900 | 0.084580  | -0.376139 |
| O  | -2.365234 | 1.280832  | -0.263284 |
| C  | -3.817974 | 1.014338  | -0.402057 |
| C  | -4.160702 | 1.260928  | -1.872900 |
| C  | -4.025143 | -0.703417 | 1.537265  |
| C  | -4.565920 | 1.986094  | 0.501406  |
| H  | 4.115453  | 3.116705  | 0.099302  |
| H  | 2.961321  | 4.813121  | 1.585961  |
| H  | -0.713996 | 2.634013  | 0.922671  |
| H  | 0.497458  | 4.563644  | 1.999791  |

|   |           |           |           |
|---|-----------|-----------|-----------|
| H | 2.311692  | -0.980840 | -3.420230 |
| H | -0.129081 | -0.993868 | -3.061818 |
| H | 0.153726  | -2.225886 | -1.752346 |
| H | 3.083336  | -2.934024 | -2.444781 |
| H | 3.852823  | -1.705311 | -1.421362 |
| H | 0.434315  | -3.657925 | 0.924103  |
| H | 3.704294  | -0.871608 | 0.613525  |
| H | -0.235166 | -2.615897 | 3.119777  |
| H | 3.061674  | 0.133612  | 2.764258  |
| H | 1.039011  | -0.644888 | 3.992530  |
| H | -5.008539 | -0.401835 | 1.910308  |
| H | -3.885069 | -1.765364 | 1.762570  |
| H | -3.260105 | -0.131505 | 2.074577  |
| H | -4.948816 | -2.347004 | -0.363393 |
| H | -5.963370 | -0.902307 | -0.527762 |
| H | -4.787845 | -1.316547 | -1.794140 |
| H | -4.432964 | 3.008536  | 0.135011  |
| H | -5.638236 | 1.760360  | 0.494867  |
| H | -4.207446 | 1.943263  | 1.532481  |
| H | -5.233994 | 1.142796  | -2.051923 |
| H | -3.877319 | 2.283381  | -2.139382 |
| H | -3.620534 | 0.574033  | -2.532401 |

Electronic Energy = -1645.86006202 (Hartree/Particle)

Dipole Moment (Debye): 5.4811

index 0

Harmonic frequencies

Number of imaginary frequencies= 1

Negatives Eigenvalues: -31.689

#### THERMOCHEMICAL DATA

Temperature 298.150 Kelvin. Pressure 1.00000 Atm.

Zero-point correction= 0.449488

(Hartree/Particle)

Thermal correction to Energy= 0.477931

Thermal correction to Enthalpy= 0.478875

Thermal correction to Gibbs Free Energy= 0.391230

Sum of electronic and zero-point Energies= -1645.410574

Sum of electronic and thermal Energies= -1645.382131

Sum of electronic and thermal Enthalpies= -1645.381187

Sum of electronic and thermal Free Energies= -1645.468832

PCM-SP (solvent=THF;6-311+g(2d,p)) = -1646.26274602

Corrected Free Energy = -1645.87151600

-----

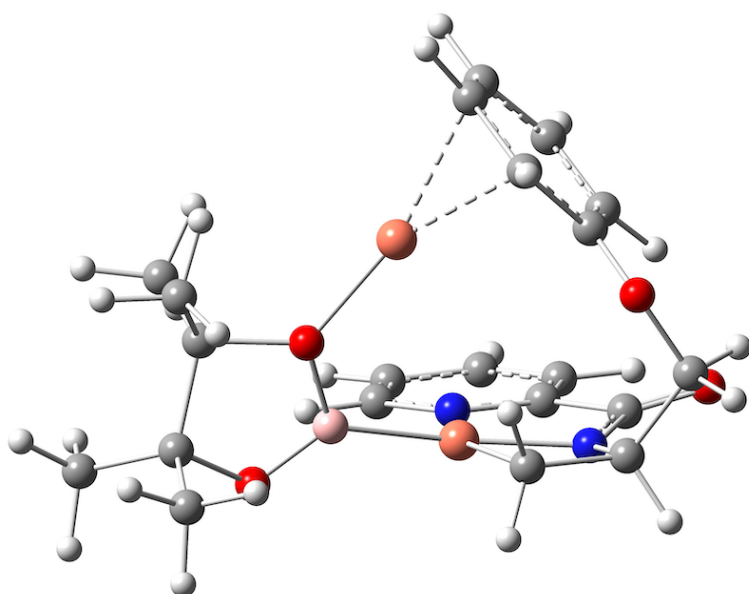

I7 Substrate: 1c  
Path: anti-markovnikov

#### CARTESIAN COORDINATES

|    |           |           |           |
|----|-----------|-----------|-----------|
| N  | 1.323786  | -2.078771 | -0.246752 |
| C  | 2.666406  | -1.894885 | -0.181564 |
| C  | 3.540813  | -2.621378 | -0.981687 |
| C  | 3.017370  | -3.579132 | -1.854764 |
| C  | 1.634563  | -3.772759 | -1.905967 |
| C  | 0.817203  | -2.995438 | -1.085445 |
| C  | 3.160862  | -0.829299 | 0.795439  |
| O  | 4.323782  | -0.411191 | 0.763951  |
| Cu | 0.408279  | -0.838101 | 1.057134  |
| N  | 2.142415  | -0.445324 | 1.571418  |
| C  | 1.920724  | 0.659521  | 2.490742  |
| C  | 0.372327  | 0.566223  | 2.474035  |
| C  | 2.512082  | 2.029495  | 2.096743  |
| O  | 1.645216  | 2.821533  | 1.248361  |
| C  | 1.492941  | 2.585728  | -0.066151 |
| C  | 0.382424  | 3.259728  | -0.664173 |
| C  | 0.121940  | 3.087368  | -2.052014 |
| C  | 0.946985  | 2.253367  | -2.829939 |
| C  | 2.049245  | 1.640519  | -2.228477 |
| C  | 2.331073  | 1.796897  | -0.865512 |
| Cu | -1.002117 | 1.728850  | -0.677451 |
| O  | -2.098605 | 0.301640  | -0.018178 |
| C  | -3.479145 | -0.088086 | -0.459443 |
| C  | -4.357292 | 1.151851  | -0.403149 |
| B  | -1.520627 | -0.800369 | 0.675197  |
| O  | -2.465521 | -1.739232 | 0.912464  |
| C  | -3.801176 | -1.200804 | 0.593973  |
| C  | -4.369791 | -0.652890 | 1.905582  |
| C  | -3.330341 | -0.600768 | -1.890796 |
| C  | -4.661834 | -2.339888 | 0.061678  |
| H  | 4.604564  | -2.423280 | -0.896932 |
| H  | 3.678411  | -4.169066 | -2.483152 |
| H  | -0.262973 | -3.102012 | -1.079827 |
| H  | 1.190954  | -4.511567 | -2.565411 |

|   |           |           |           |
|---|-----------|-----------|-----------|
| H | 2.333362  | 0.423746  | 3.482470  |
| H | -0.076723 | 0.118427  | 3.361245  |
| H | -0.161361 | 1.458586  | 2.149137  |
| H | 2.606647  | 2.653440  | 2.987117  |
| H | 3.501214  | 1.904775  | 1.647544  |
| H | -0.112314 | 4.040588  | -0.087771 |
| H | 3.206915  | 1.319967  | -0.443042 |
| H | -0.652636 | 3.686276  | -2.525979 |
| H | 2.716978  | 1.027443  | -2.827503 |
| H | 0.749785  | 2.127238  | -3.889248 |
| H | -4.303184 | -0.866507 | -2.314894 |
| H | -2.891482 | 0.186887  | -2.513989 |
| H | -2.677892 | -1.477759 | -1.936473 |
| H | -4.025980 | 1.879598  | -1.153356 |
| H | -5.395642 | 0.888797  | -0.631523 |
| H | -4.327147 | 1.629416  | 0.578216  |
| H | -4.829120 | -3.072410 | 0.856477  |
| H | -5.637453 | -1.962204 | -0.264713 |
| H | -4.185489 | -2.853499 | -0.776372 |
| H | -5.393984 | -0.289699 | 1.773439  |
| H | -4.382020 | -1.456010 | 2.647677  |
| H | -3.755660 | 0.163411  | 2.299944  |

Electronic Energy = -1645.86850731 (Hartree/Particle)  
Dipole Moment (Debye): 7.3570  
index 0  
Harmonic frequencies  
Number of imaginary frequencies= 0

# THERMOCHEMICAL DATA

Temperature 298.150 Kelvin. Pressure 1.00000 Atm.  
Zero-point correction= 0.449876  
(Hartree/Particle)  
Thermal correction to Energy= 0.479002  
Thermal correction to Enthalpy= 0.479946  
Thermal correction to Gibbs Free Energy= 0.389496  
Sum of electronic and zero-point Energies= -1645.418631  
Sum of electronic and thermal Energies= -1645.389506  
Sum of electronic and thermal Enthalpies= -1645.388562  
Sum of electronic and thermal Free Energies= -1645.479011  
PCM-SP (solvent=THF;6-311+g(2d,p)) = -1646.27329686  
Corrected Free Energy = -1645.88380055

-----  
PATH: MARKOVNIKOV

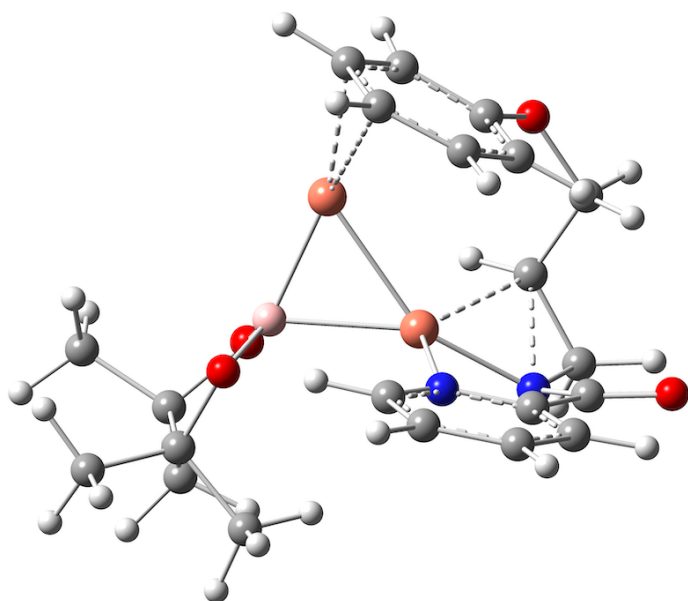

TS8                      Substrate: 1c  
                              Path: Markovnikov

# CARTESIAN COORDINATES

|    |           |           |           |
|----|-----------|-----------|-----------|
| C  | 1.303245  | -0.774821 | 2.519760  |
| N  | 1.099895  | 1.139769  | 2.023652  |
| C  | 2.143063  | 1.837370  | 1.402146  |
| O  | 3.215448  | 2.099559  | 1.931126  |
| C  | 1.386728  | 0.493161  | 3.294479  |
| C  | 1.807906  | 2.288702  | 0.001752  |
| C  | 2.590731  | 3.228503  | -0.665976 |
| C  | 2.218776  | 3.589358  | -1.964779 |
| C  | 1.098618  | 2.990074  | -2.547193 |
| C  | 0.384219  | 2.037285  | -1.814962 |
| N  | 0.735633  | 1.707992  | -0.567438 |
| Cu | -0.233174 | -1.783257 | -0.630598 |
| H  | 3.458067  | 3.652190  | -0.170891 |
| H  | 2.795320  | 4.328564  | -2.513276 |
| H  | -0.492860 | 1.528376  | -2.203897 |
| H  | 0.777264  | 3.255036  | -3.549597 |
| H  | 2.368831  | 0.736704  | 3.707867  |
| Cu | 0.131029  | 0.140906  | 0.685551  |
| B  | -1.790751 | -0.575125 | -0.107235 |
| O  | -2.632392 | -0.841451 | 0.941650  |
| O  | -2.328893 | 0.299136  | -1.024538 |
| C  | -3.940642 | -0.235209 | 0.627510  |
| C  | -3.544991 | 0.870384  | -0.415585 |
| H  | 0.426581  | -1.412146 | 2.611825  |
| C  | -4.570904 | 1.119998  | -1.513448 |
| H  | -5.516613 | 1.464013  | -1.079412 |
| H  | -4.207389 | 1.897693  | -2.192765 |
| H  | -4.763493 | 0.219265  | -2.100201 |
| C  | -3.107048 | 2.190119  | 0.230151  |
| H  | -2.666853 | 2.835073  | -0.536691 |
| H  | -3.955733 | 2.717144  | 0.677113  |
| H  | -2.350922 | 2.022023  | 1.004931  |
| C  | -4.801825 | -1.355325 | 0.036635  |
| H  | -4.861431 | -2.177376 | 0.756235  |

|   |           |           |           |
|---|-----------|-----------|-----------|
| H | -5.817806 | -1.004599 | -0.171388 |
| H | -4.369874 | -1.743922 | -0.891243 |
| C | -4.550223 | 0.288158  | 1.922414  |
| H | -5.482594 | 0.825526  | 1.714778  |
| H | -4.781734 | -0.549658 | 2.587332  |
| H | -3.869333 | 0.961340  | 2.448429  |
| C | 2.603710  | -1.412157 | 2.123628  |
| H | 3.342449  | -0.665540 | 1.812104  |
| H | 2.999723  | -1.884955 | 3.034272  |
| O | 2.472143  | -2.486074 | 1.195929  |
| C | 2.289929  | -2.208783 | -0.127107 |
| C | 2.872803  | -1.125500 | -0.800346 |
| C | 1.476786  | -3.128421 | -0.836491 |
| C | 2.616245  | -0.938345 | -2.164087 |
| H | 3.520870  | -0.430991 | -0.277641 |
| C | 1.223140  | -2.915654 | -2.208075 |
| H | 1.143717  | -4.030268 | -0.327489 |
| C | 1.782417  | -1.808778 | -2.869951 |
| H | 3.070545  | -0.092570 | -2.671840 |
| H | 0.622141  | -3.636496 | -2.754707 |
| H | 1.581039  | -1.647391 | -3.923773 |
| H | 0.590822  | 0.652364  | 4.022748  |

Electronic Energy = -1645.85266128 (Hartree/Particle)

Dipole Moment (Debye): 2.7354

index 1

Number of imaginary frequencies= 1

Negatives Eigenvalues: -168.079

#### THERMOCHEMICAL DATA

Temperature 298.150 Kelvin. Pressure 1.00000 Atm.

Zero-point correction= 0.447730  
(Hartree/Particle)

Thermal correction to Energy= 0.477240

Thermal correction to Enthalpy= 0.478184

Thermal correction to Gibbs Free Energy= 0.385894

Sum of electronic and zero-point Energies= -1645.404931

Sum of electronic and thermal Energies= -1645.375421

Sum of electronic and thermal Enthalpies= -1645.374477

Sum of electronic and thermal Free Energies= -1645.466767

PCM-SP (solvent=THF;6-311+g(2d,p)) = -1646.25513609

Corrected Free Energy = -1645.86924181

-----

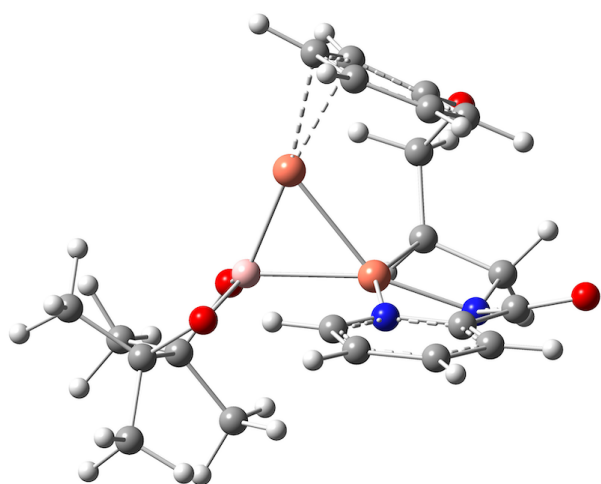

I6 Substrate: 1c  
Path: Markovnikov

# CARTESIAN COORDINATES

|    |           |           |           |
|----|-----------|-----------|-----------|
| C  | -0.400877 | 1.540152  | 2.053085  |
| N  | -1.335375 | -0.429743 | 2.182612  |
| C  | -2.413971 | -1.165678 | 1.772516  |
| O  | -3.542630 | -1.114419 | 2.247875  |
| C  | -1.439197 | 0.828390  | 2.913207  |
| C  | -2.045302 | -2.100135 | 0.637668  |
| C  | -2.844747 | -3.172053 | 0.258324  |
| C  | -2.422017 | -3.967004 | -0.811634 |
| C  | -1.227468 | -3.655219 | -1.466917 |
| C  | -0.490130 | -2.549064 | -1.040940 |
| N  | -0.899811 | -1.797403 | -0.009194 |
| Cu | 0.151703  | 1.126694  | -1.258914 |
| H  | -3.766496 | -3.359875 | 0.799383  |
| H  | -3.015576 | -4.819780 | -1.128247 |
| H  | 0.445719  | -2.250805 | -1.502135 |
| H  | -0.866087 | -4.256374 | -2.295003 |
| H  | -2.438897 | 1.269240  | 2.841541  |
| H  | -1.162897 | 0.727776  | 3.968420  |
| Cu | -0.204076 | -0.046291 | 0.762754  |
| B  | 1.736913  | 0.258179  | -0.274238 |
| O  | 2.593016  | 0.977573  | 0.511551  |
| O  | 2.295451  | -0.868357 | -0.817027 |
| C  | 3.801308  | 0.146707  | 0.708675  |
| C  | 3.748455  | -0.813800 | -0.534808 |
| H  | 0.619200  | 1.554331  | 2.444066  |
| C  | -0.787223 | 2.853305  | 1.405542  |
| H  | -0.892875 | 3.600512  | 2.203694  |
| H  | -0.010192 | 3.198535  | 0.715675  |
| O  | -2.079508 | 2.827293  | 0.772564  |
| C  | -2.159651 | 2.226261  | -0.451173 |
| C  | -3.070849 | 1.179994  | -0.624553 |
| C  | -1.361284 | 2.661315  | -1.540336 |
| C  | -3.143129 | 0.513021  | -1.854364 |
| H  | -3.693015 | 0.883633  | 0.214554  |
| C  | -1.427151 | 1.961215  | -2.768582 |
| H  | -0.788959 | 3.582481  | -1.456077 |
| C  | -2.308206 | 0.871957  | -2.915802 |
| H  | -3.845892 | -0.306873 | -1.970859 |

|   |           |           |           |
|---|-----------|-----------|-----------|
| H | -0.855614 | 2.322212  | -3.619823 |
| H | -2.357696 | 0.341815  | -3.861368 |
| C | 4.237101  | -2.233229 | -0.275459 |
| H | 4.155783  | -2.826802 | -1.191393 |
| H | 5.289876  | -2.222229 | 0.028430  |
| H | 3.654439  | -2.727790 | 0.504923  |
| C | 4.404594  | -0.231955 | -1.789408 |
| H | 5.494126  | -0.207045 | -1.688317 |
| H | 4.153527  | -0.859711 | -2.649778 |
| H | 4.051144  | 0.784347  | -1.991710 |
| C | 3.595571  | -0.571456 | 2.046180  |
| H | 4.466050  | -1.181135 | 2.307440  |
| H | 3.451085  | 0.174077  | 2.834135  |
| H | 2.712111  | -1.218765 | 2.021609  |
| C | 5.016676  | 1.062552  | 0.765969  |
| H | 4.961255  | 1.697220  | 1.655712  |
| H | 5.935763  | 0.469065  | 0.828710  |
| H | 5.079029  | 1.711012  | -0.110516 |

Electronic Energy = -1645.85932718 (Hartree/Particle)

Dipole Moment (Debye): 5.2390

index 0

Harmonic frequencies

Number of imaginary frequencies= 0

#### THERMOCHEMICAL DATA

Temperature 298.150 Kelvin. Pressure 1.00000 Atm.

Zero-point correction= 0.449249

(Hartree/Particle)

Thermal correction to Energy= 0.478828

Thermal correction to Enthalpy= 0.479773

Thermal correction to Gibbs Free Energy= 0.387601

Sum of electronic and zero-point Energies= -1645.410078

Sum of electronic and thermal Energies= -1645.380499

Sum of electronic and thermal Enthalpies= -1645.379554

Sum of electronic and thermal Free Energies= -1645.471727

PCM-SP (solvent=THF;6-311+g(2d,p)) = -1646.26409937

Corrected Free Energy = -1645.87649919

-----

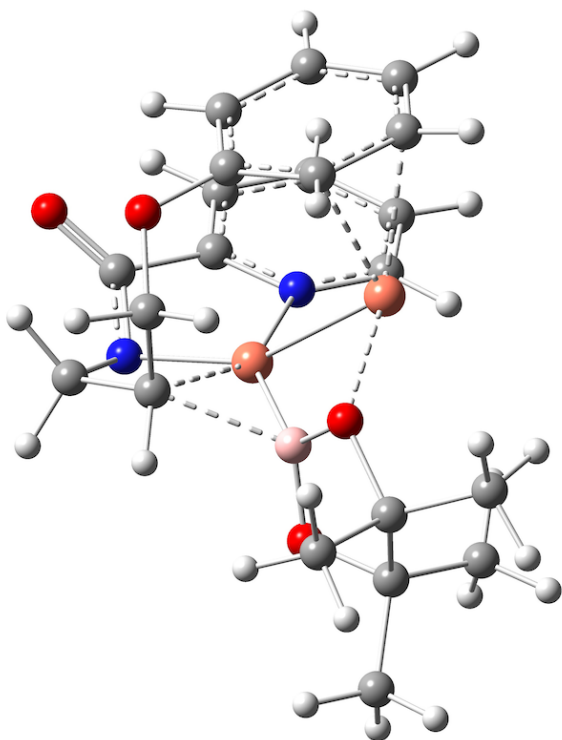

TS9                      Substrate: 1c  
                              Path: Markovnikov

# CARTESIAN COORDINATES

|    |           |           |           |
|----|-----------|-----------|-----------|
| C  | 0.597771  | -0.676364 | 2.051608  |
| N  | -1.357094 | -1.897916 | 1.399656  |
| C  | -2.644232 | -1.540901 | 1.240642  |
| O  | -3.521502 | -1.307586 | 2.076809  |
| C  | -0.563276 | -1.604011 | 2.583794  |
| C  | -2.938850 | -1.347152 | -0.251955 |
| C  | -4.221614 | -1.452440 | -0.780344 |
| C  | -4.414273 | -1.218681 | -2.142915 |
| C  | -3.319225 | -0.861538 | -2.936490 |
| C  | -2.068547 | -0.742155 | -2.337408 |
| N  | -1.883808 | -0.981052 | -1.026649 |
| Cu | 0.498479  | 1.220316  | -0.777353 |
| H  | -5.034752 | -1.715115 | -0.111501 |
| H  | -5.403017 | -1.313256 | -2.582718 |
| H  | -1.188176 | -0.451402 | -2.900288 |
| H  | -3.427867 | -0.672435 | -3.999451 |
| H  | -1.134985 | -1.080317 | 3.359925  |
| H  | -0.144520 | -2.521262 | 3.009869  |
| Cu | -0.305568 | -0.900470 | 0.171755  |
| B  | 1.655566  | -0.561247 | 0.297977  |
| O  | 2.381768  | 0.622177  | 0.185946  |
| O  | 2.360588  | -1.664613 | -0.073717 |
| C  | 3.775567  | 0.231574  | -0.190711 |
| C  | 3.539180  | -1.186828 | -0.822660 |
| H  | 1.568095  | -1.117207 | 2.307496  |
| C  | 0.551293  | 0.739232  | 2.644495  |
| H  | 0.711147  | 0.643316  | 3.723404  |
| H  | 1.340732  | 1.375482  | 2.238596  |
| O  | -0.735668 | 1.366900  | 2.540588  |

|   |           |           |           |
|---|-----------|-----------|-----------|
| C | -1.102863 | 1.936936  | 1.358194  |
| C | -2.424381 | 1.753896  | 0.938638  |
| C | -0.216436 | 2.724337  | 0.578772  |
| C | -2.845555 | 2.267443  | -0.292775 |
| H | -3.092158 | 1.173895  | 1.568960  |
| C | -0.649859 | 3.211388  | -0.683294 |
| H | 0.732013  | 3.053759  | 0.995416  |
| C | -1.964486 | 2.962206  | -1.124282 |
| H | -3.870324 | 2.098662  | -0.610527 |
| H | -0.003964 | 3.883993  | -1.243611 |
| H | -2.294602 | 3.346409  | -2.084073 |
| C | 4.676331  | -2.177120 | -0.613478 |
| H | 4.421145  | -3.134633 | -1.076654 |
| H | 5.594761  | -1.804760 | -1.081145 |
| H | 4.868711  | -2.354538 | 0.446659  |
| C | 3.122192  | -1.134281 | -2.295811 |
| H | 3.959272  | -0.843925 | -2.937705 |
| H | 2.774696  | -2.124639 | -2.602772 |
| H | 2.300049  | -0.424745 | -2.454348 |
| C | 4.559628  | 0.200323  | 1.120126  |
| H | 5.613810  | -0.028656 | 0.936281  |
| H | 4.501441  | 1.180661  | 1.602477  |
| H | 4.162332  | -0.550980 | 1.810072  |
| C | 4.316934  | 1.289467  | -1.138780 |
| H | 4.431516  | 2.242043  | -0.612388 |
| H | 5.300956  | 0.990260  | -1.515551 |
| H | 3.654475  | 1.445858  | -1.994187 |

Electronic Energy = -1645.83478468 (Hartree/Particle)

Dipole Moment (Debye): 8.7563

index 0

Harmonic frequencies

Number of imaginary frequencies= 1

Negatives Eigenvalues: -170.316

# THERMOCHEMICAL DATA

Temperature 298.150 Kelvin. Pressure 1.00000 Atm.

Zero-point correction= 0.449085

(Hartree/Particle)

Thermal correction to Energy= 0.477711

Thermal correction to Enthalpy= 0.478655

Thermal correction to Gibbs Free Energy= 0.390923

Sum of electronic and zero-point Energies= -1645.385699

Sum of electronic and thermal Energies= -1645.357074

Sum of electronic and thermal Enthalpies= -1645.356129

Sum of electronic and thermal Free Energies= -1645.443862

PCM-SP (solvent=THF;6-311+g(2d,p)) = -1646.24680146

Corrected Free Energy = -1645.85587878

-----  
-----

Compound **1a**  $^1\text{H}$  NMR (250 MHz,  $\text{CDCl}_3$ )

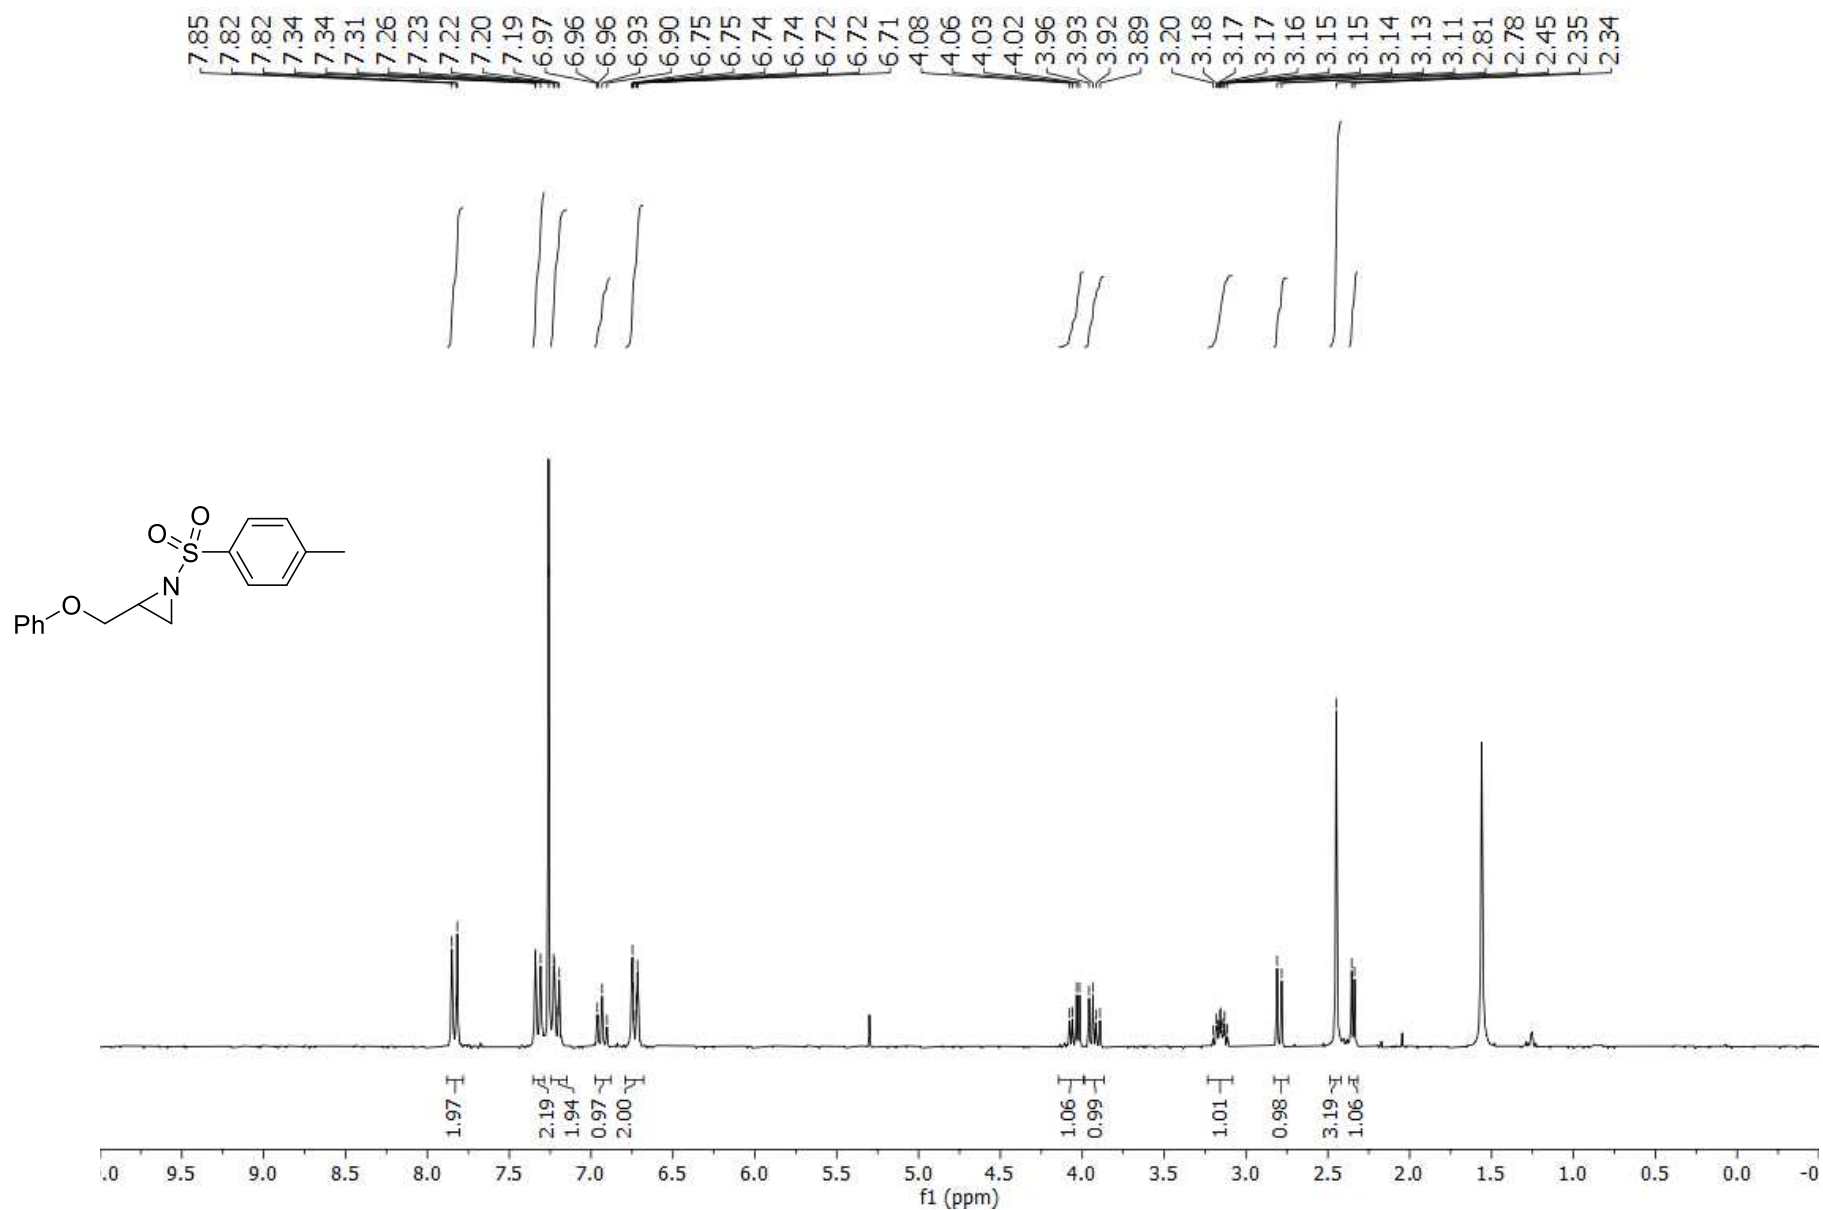

Compound **1b**  $^1\text{H}$  NMR (250 MHz,  $\text{CDCl}_3$ )

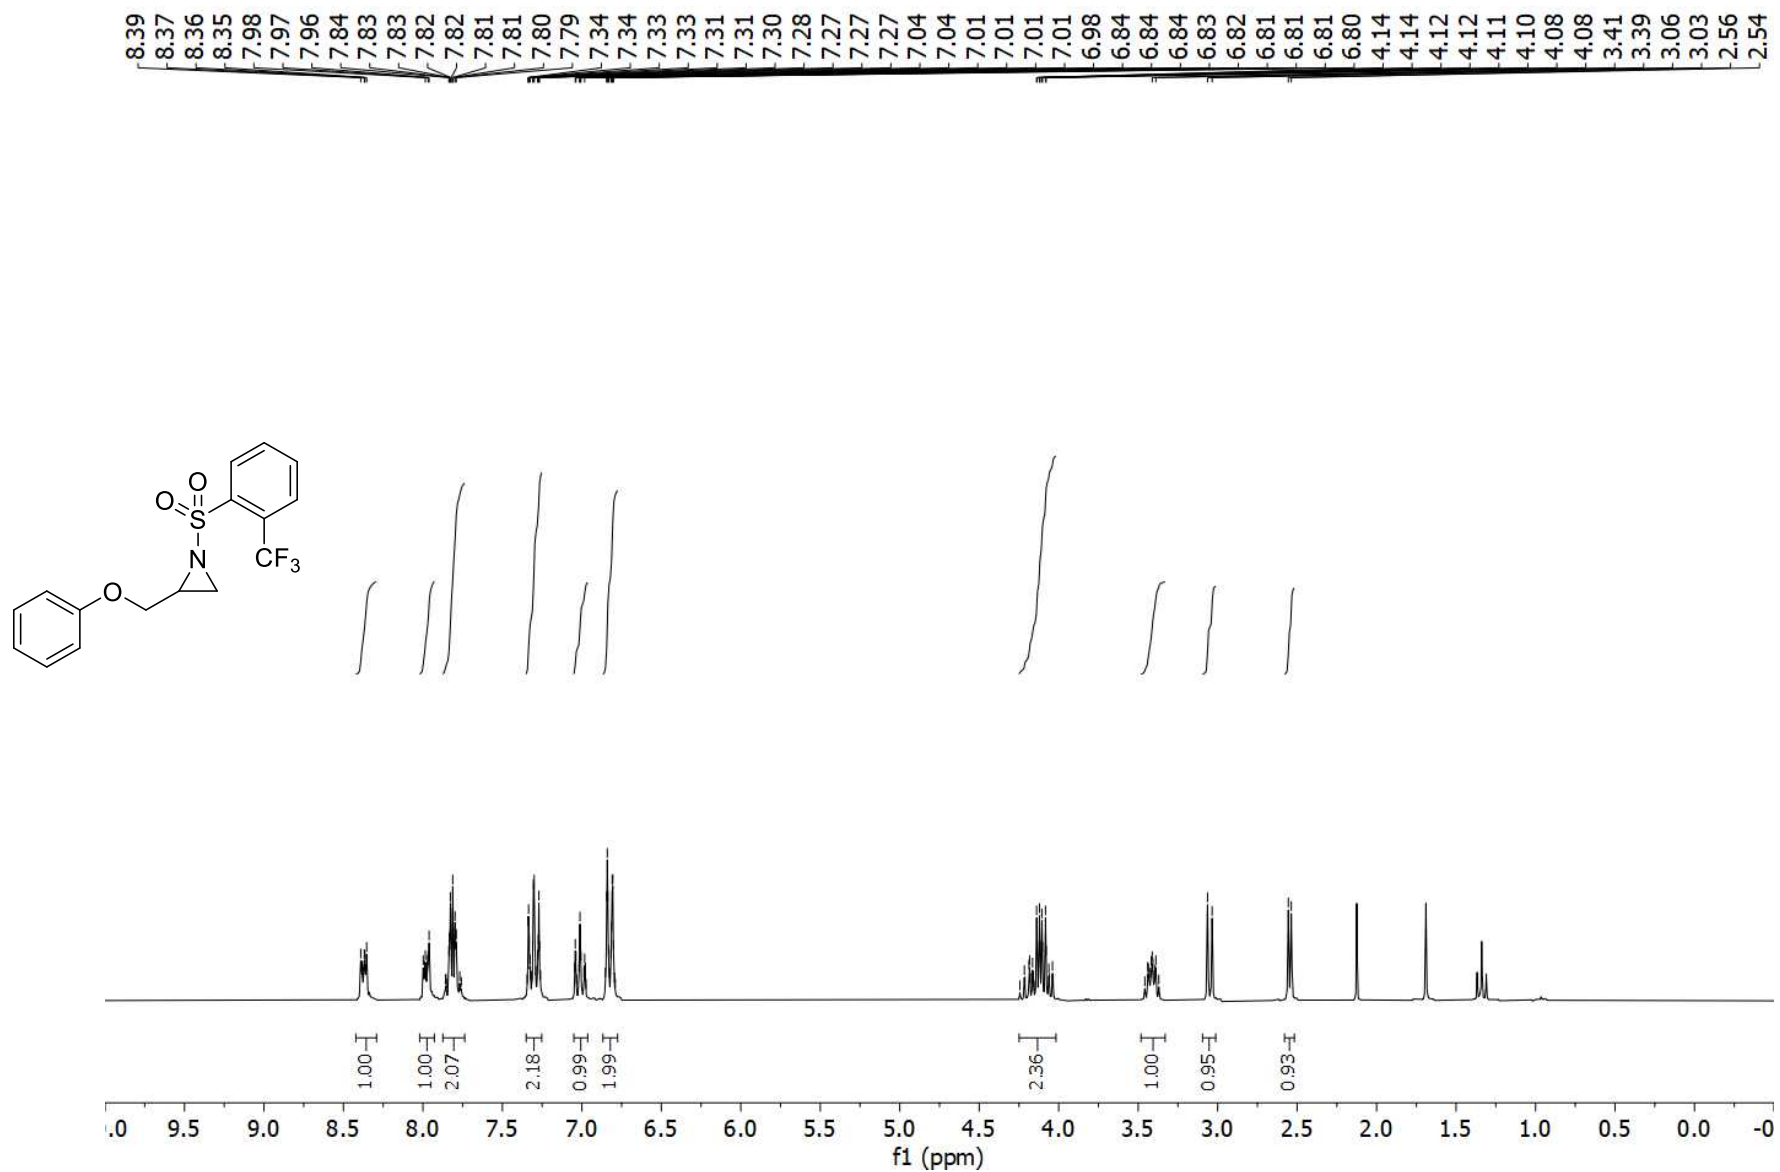

Compound **1b**  $^{13}\text{C}$  NMR (63 MHz,  $\text{CDCl}_3$ )

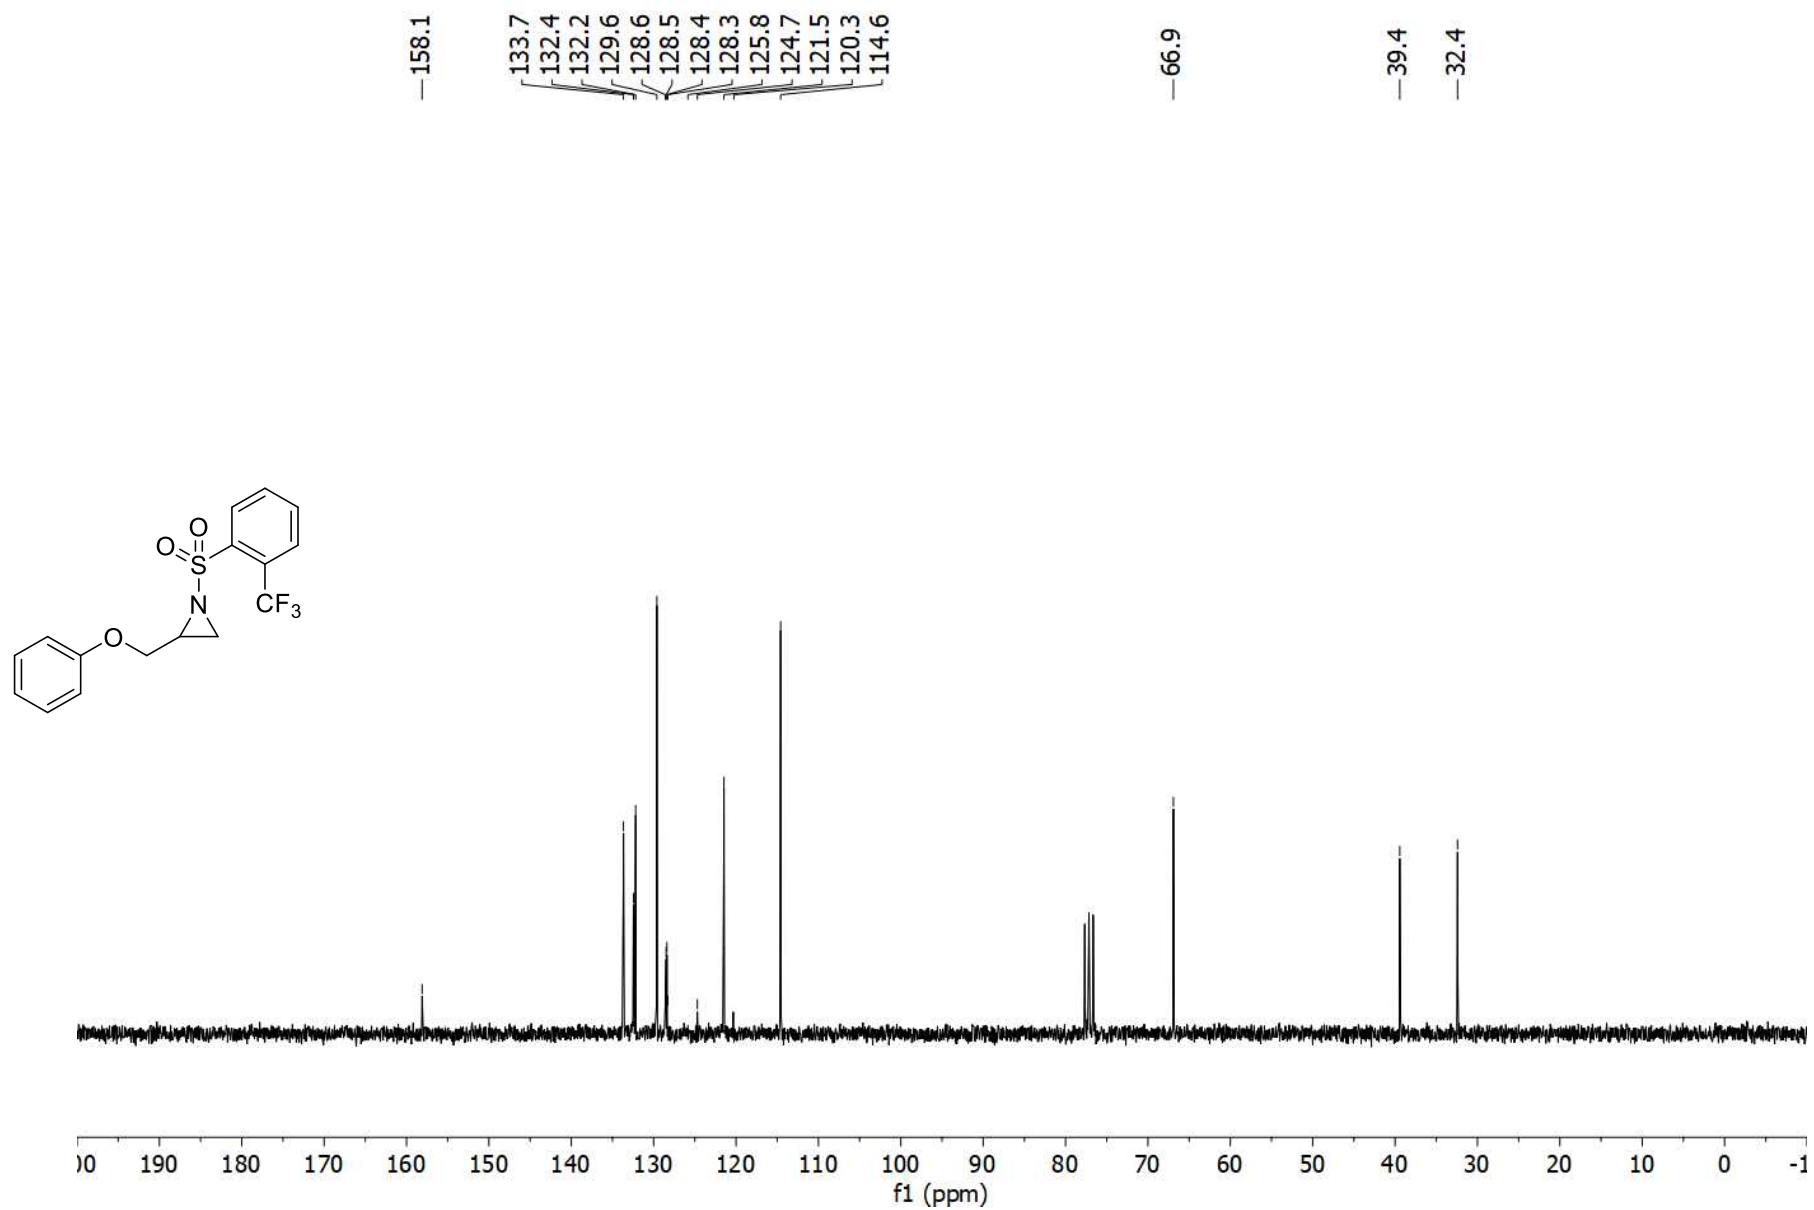

Compound **1c**  $^1\text{H}$  NMR (250 MHz,  $\text{CDCl}_3$ )

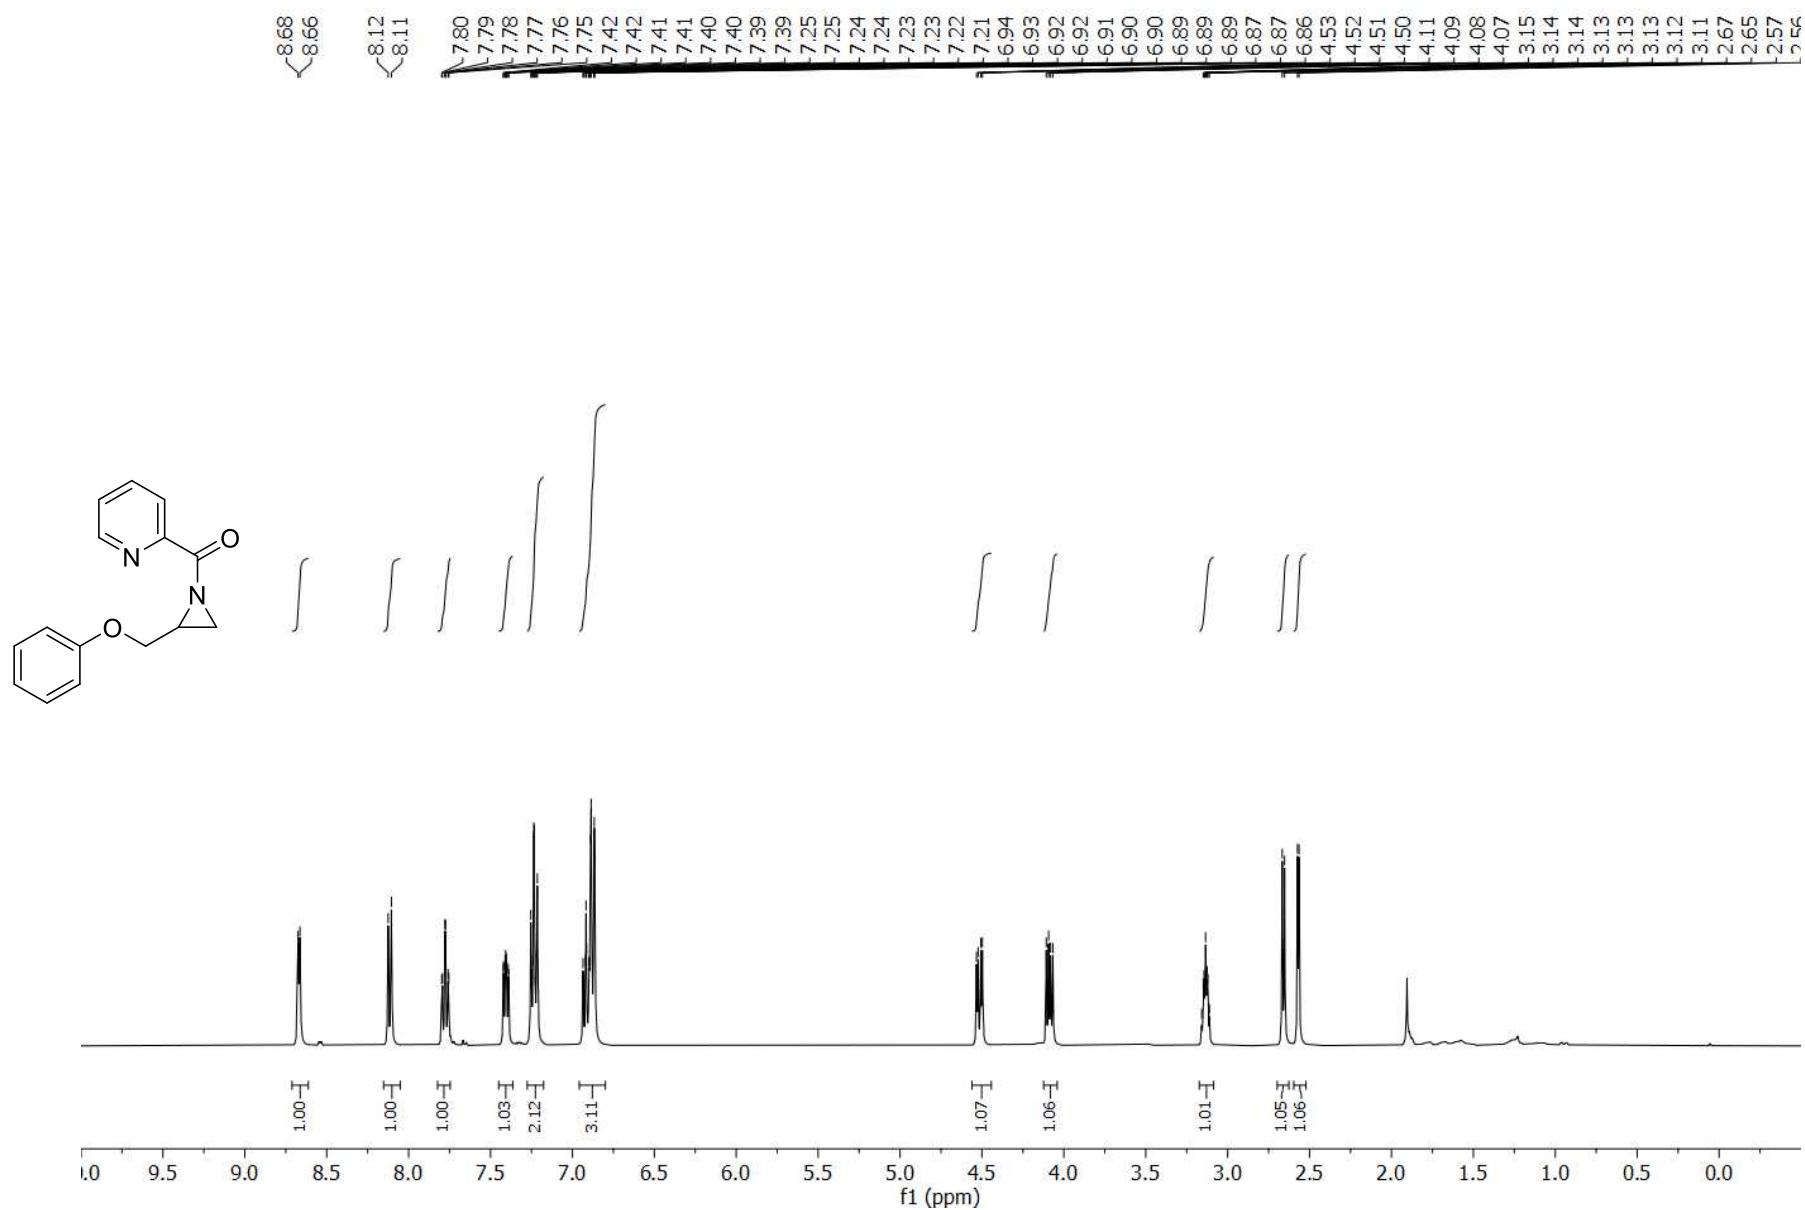

Compound **1c**  $^{13}\text{C}$  NMR (101 MHz,  $\text{CDCl}_3$ )

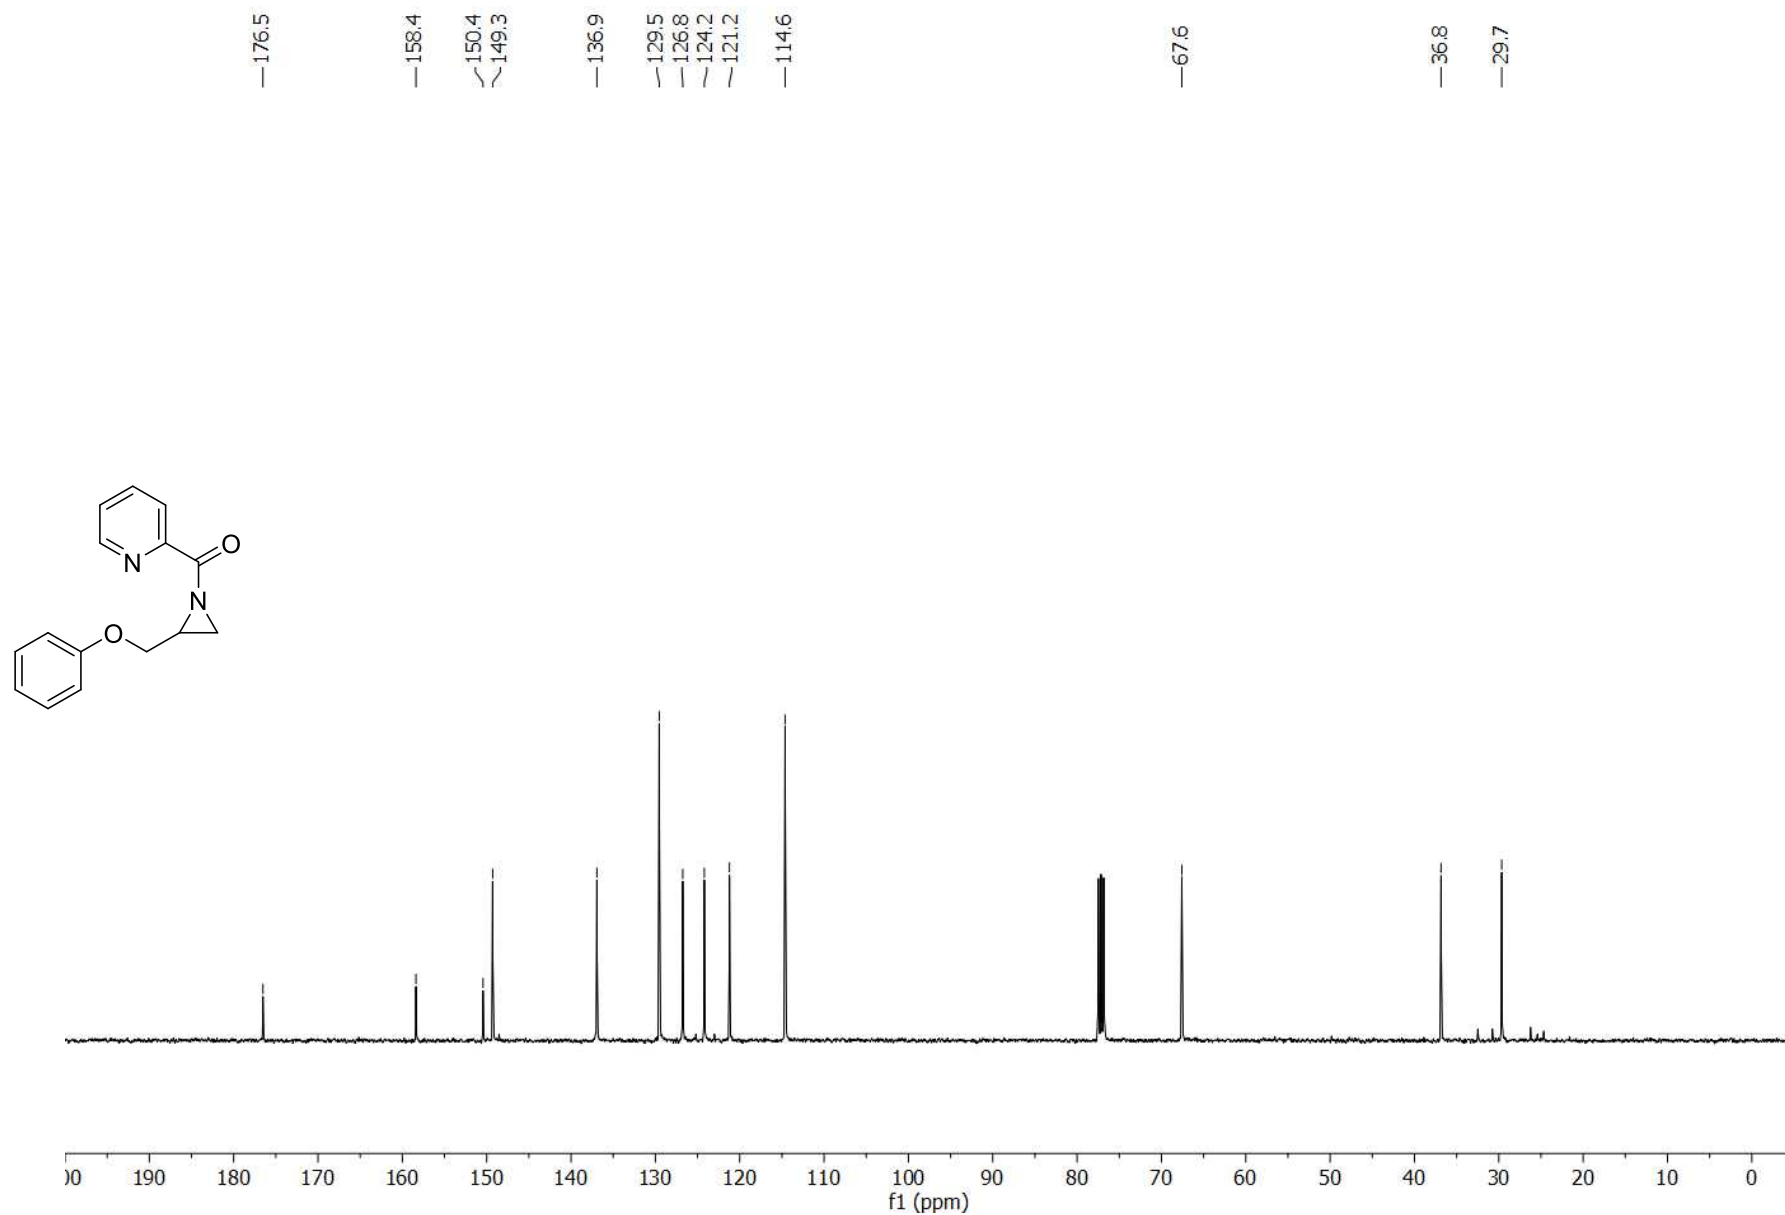

Compound **4c**  $^1\text{H}$  NMR (250 MHz,  $\text{CDCl}_3$ )

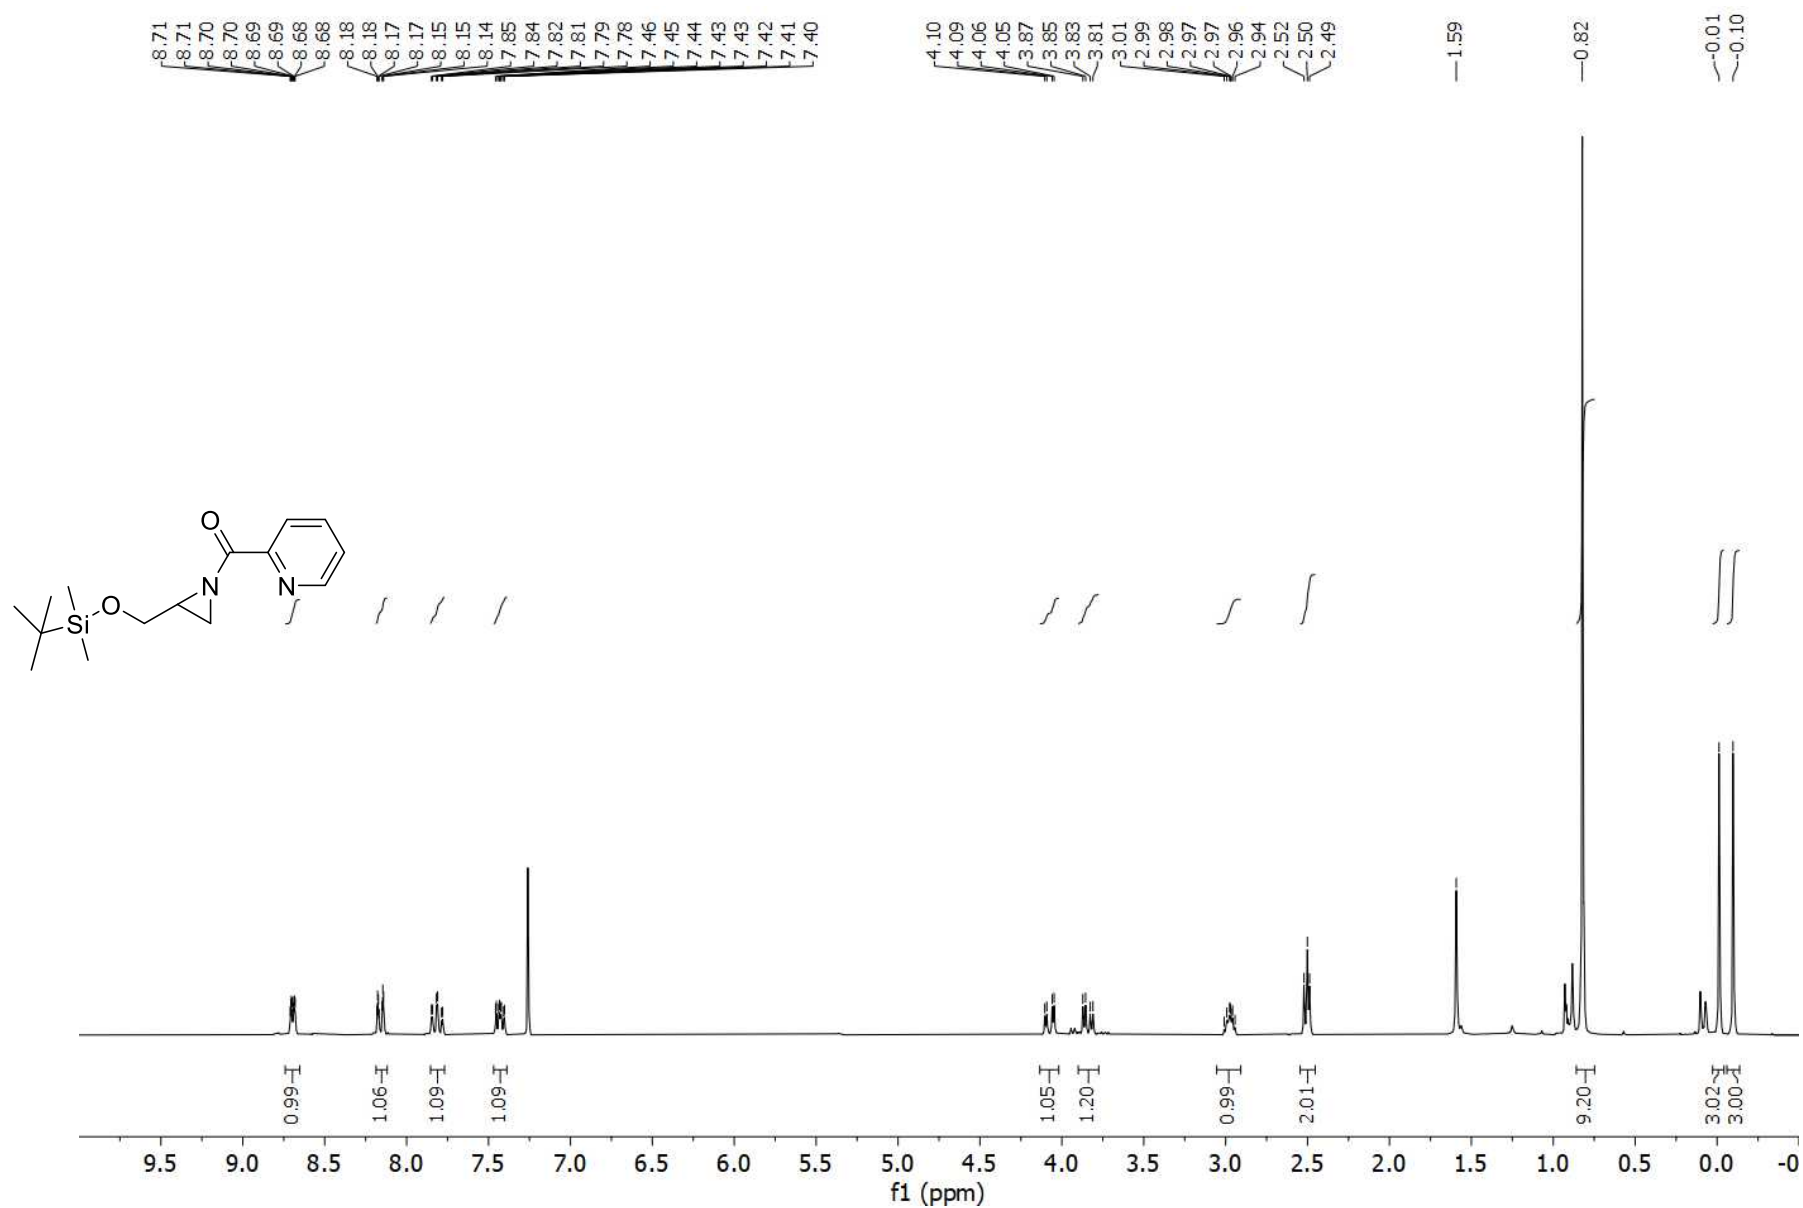

Compound **4c**  $^{13}\text{C}$  NMR (63 MHz,  $\text{CDCl}_3$ )

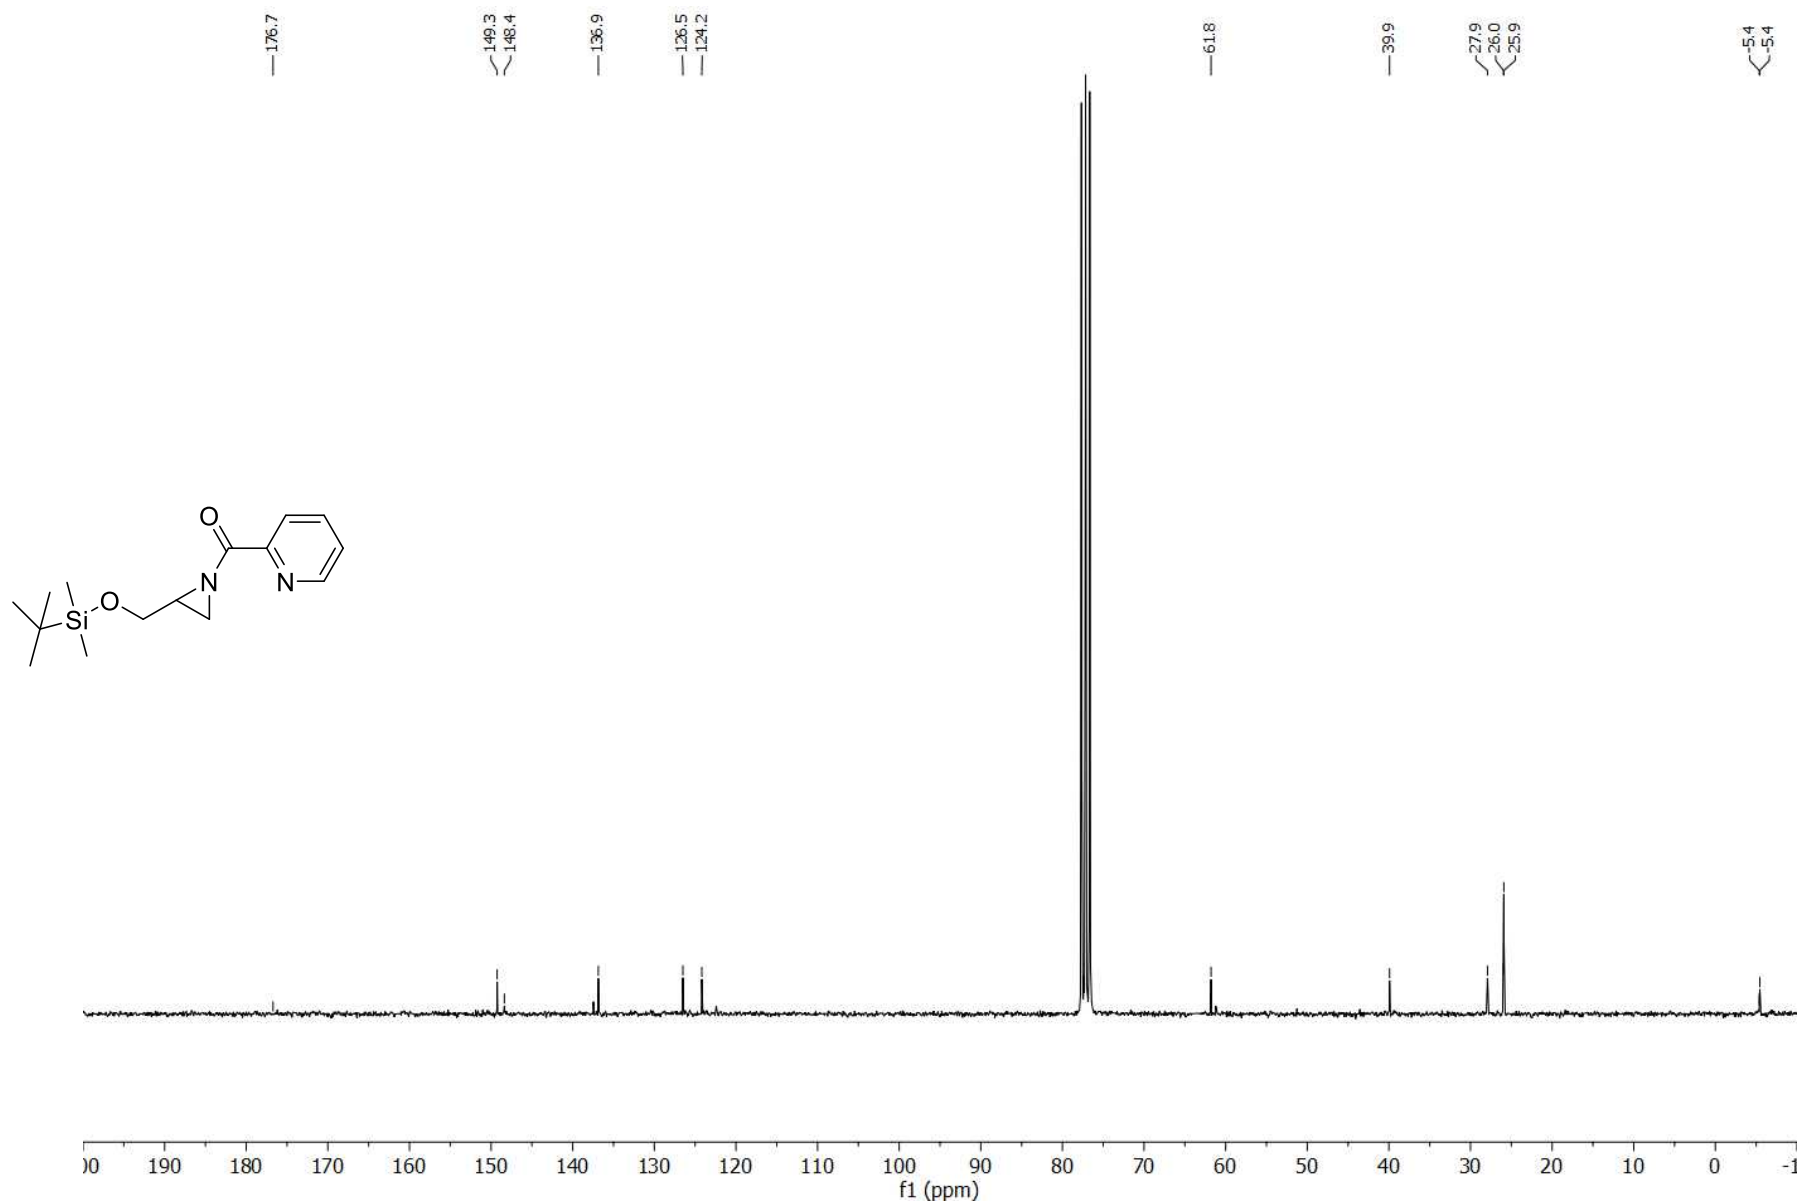

Compound **6c**  $^1\text{H}$  NMR (400 MHz,  $\text{CDCl}_3$ )

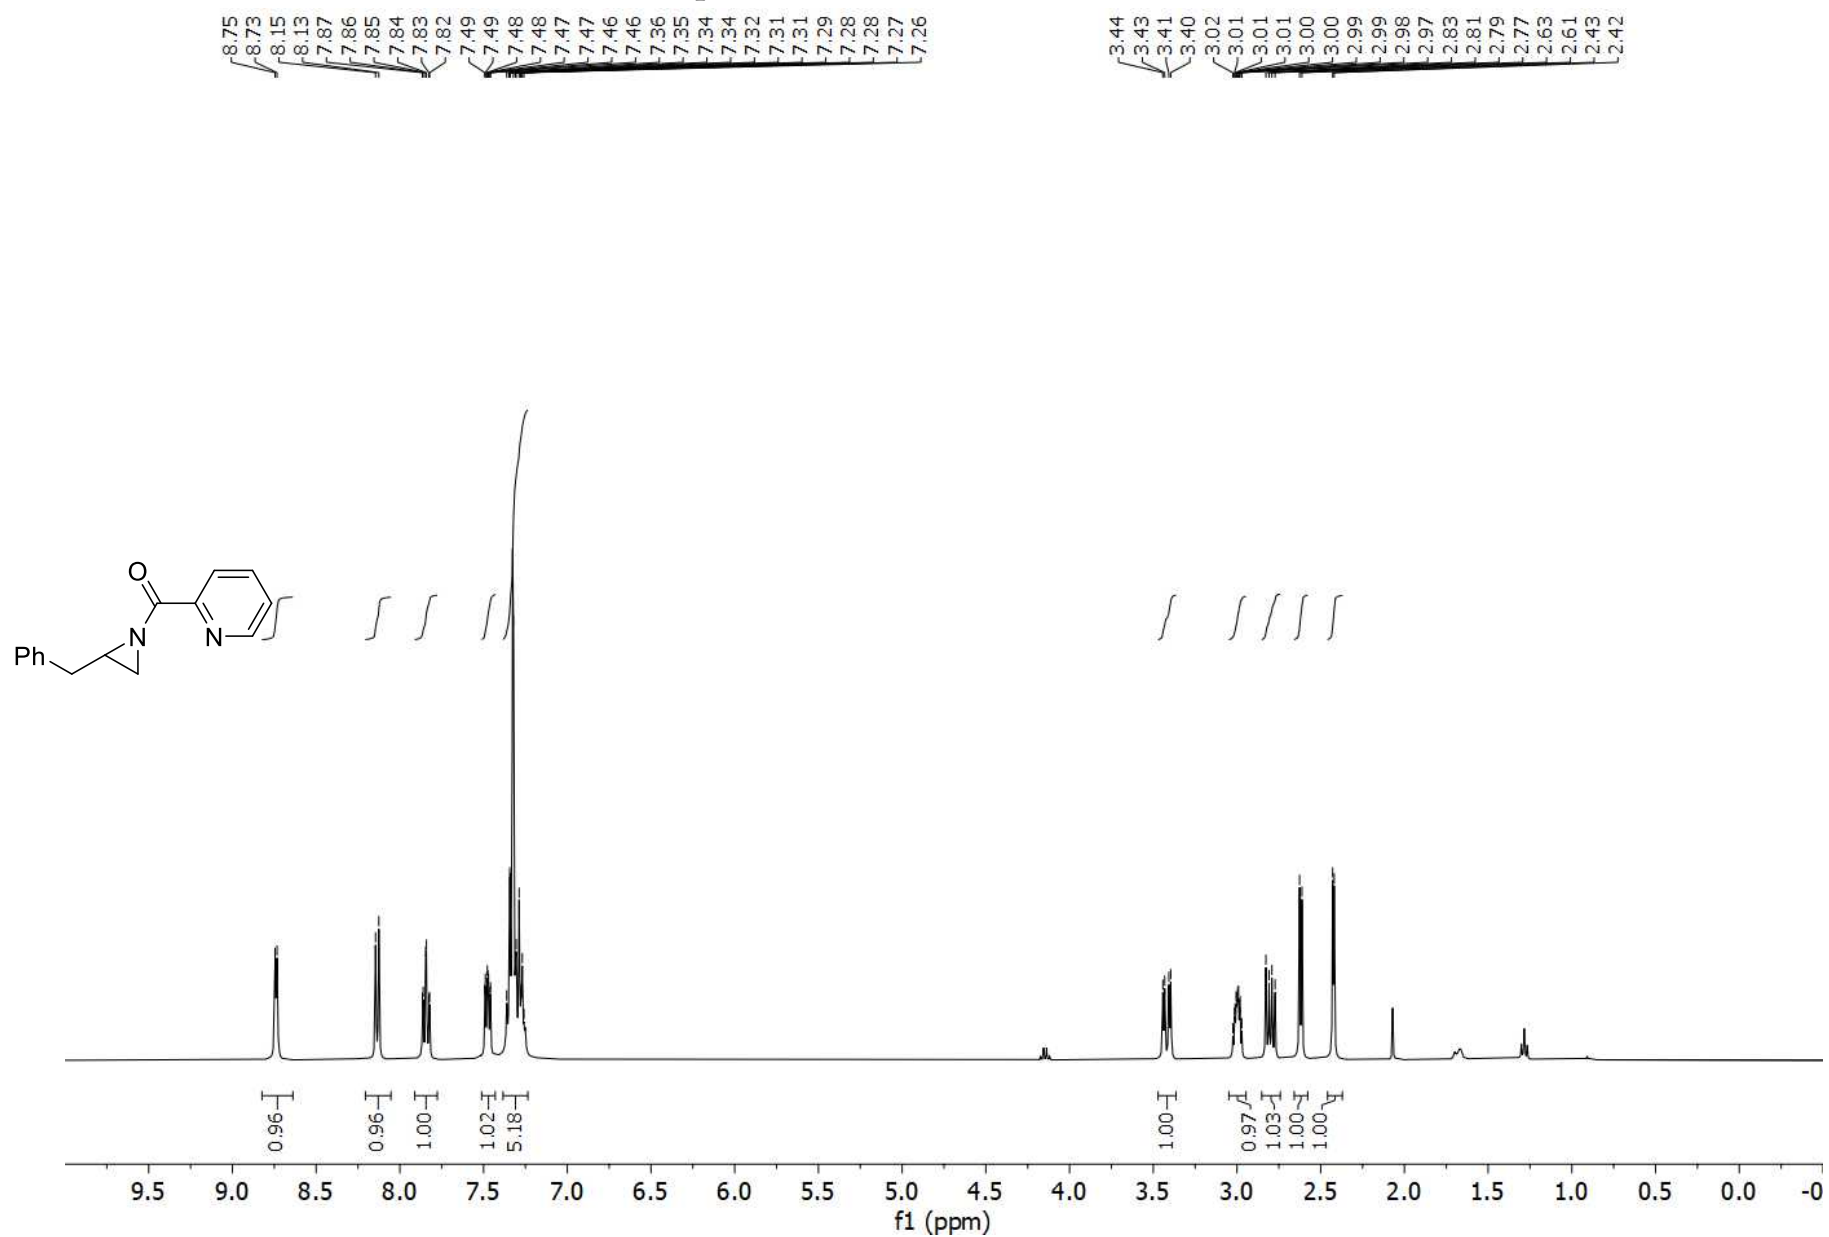

Compound **6c**  $^{13}\text{C}$  NMR (101 MHz,  $\text{CDCl}_3$ )

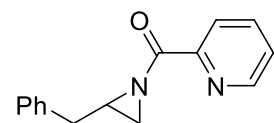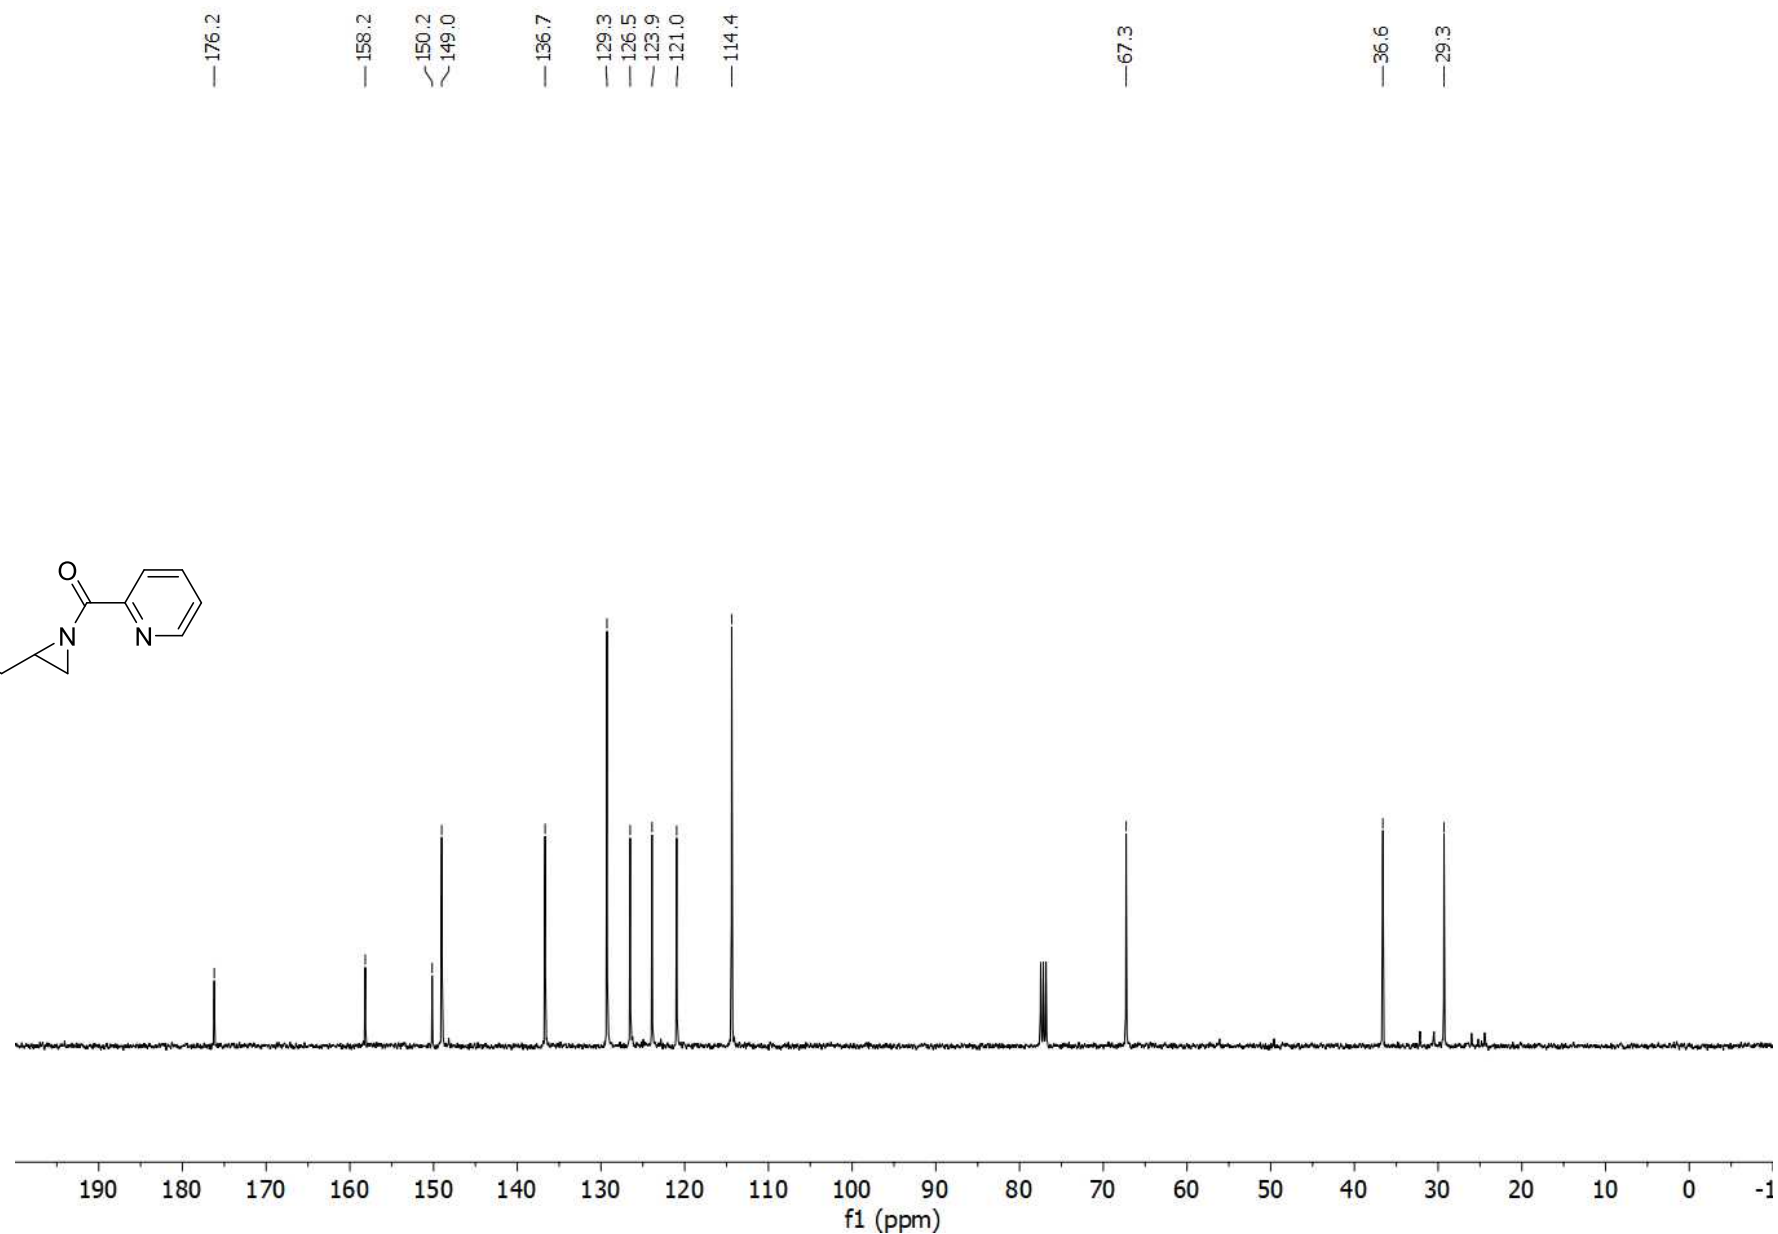

Compound **7c**  $^1\text{H}$  NMR (250 MHz,  $\text{CDCl}_3$ )

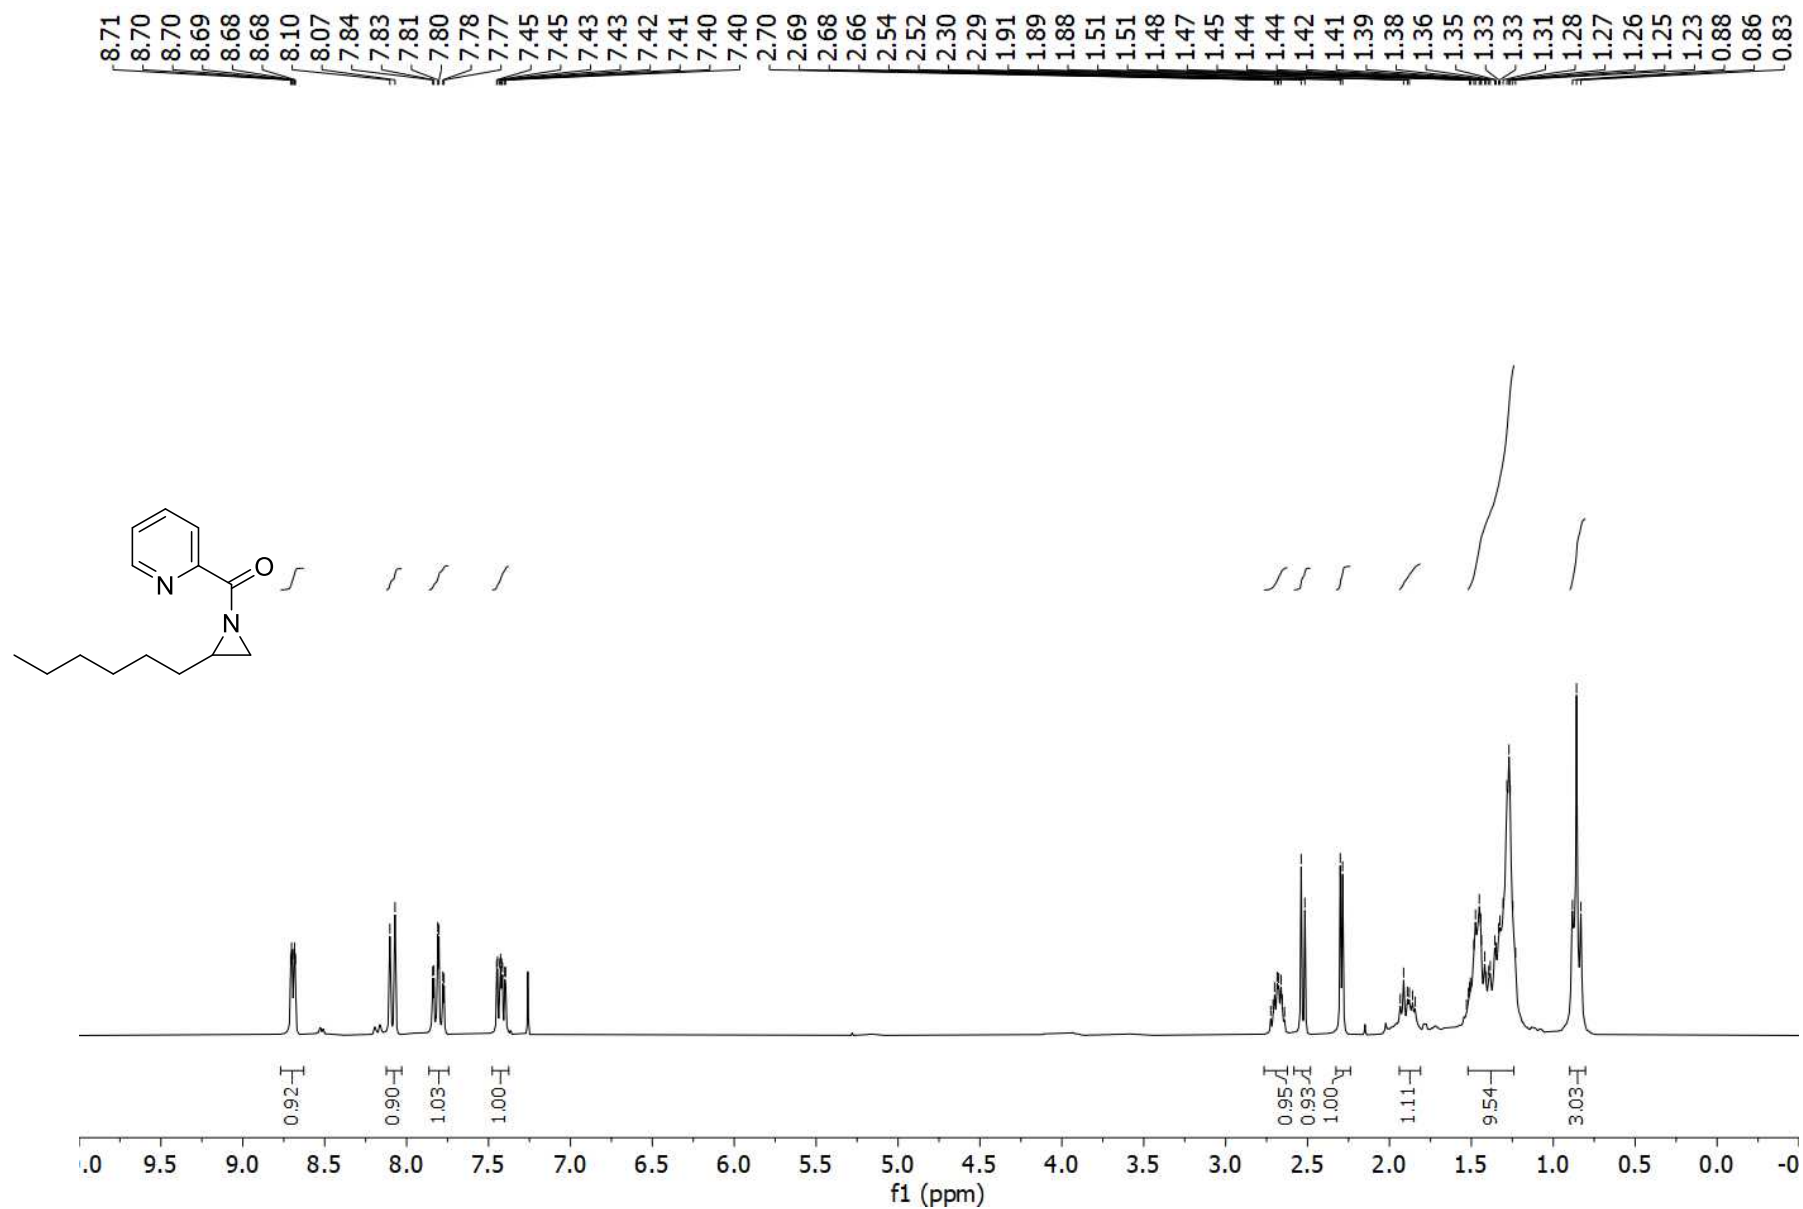

Compound **7c**  $^{13}\text{C}$  NMR (101 MHz,  $\text{CDCl}_3$ )

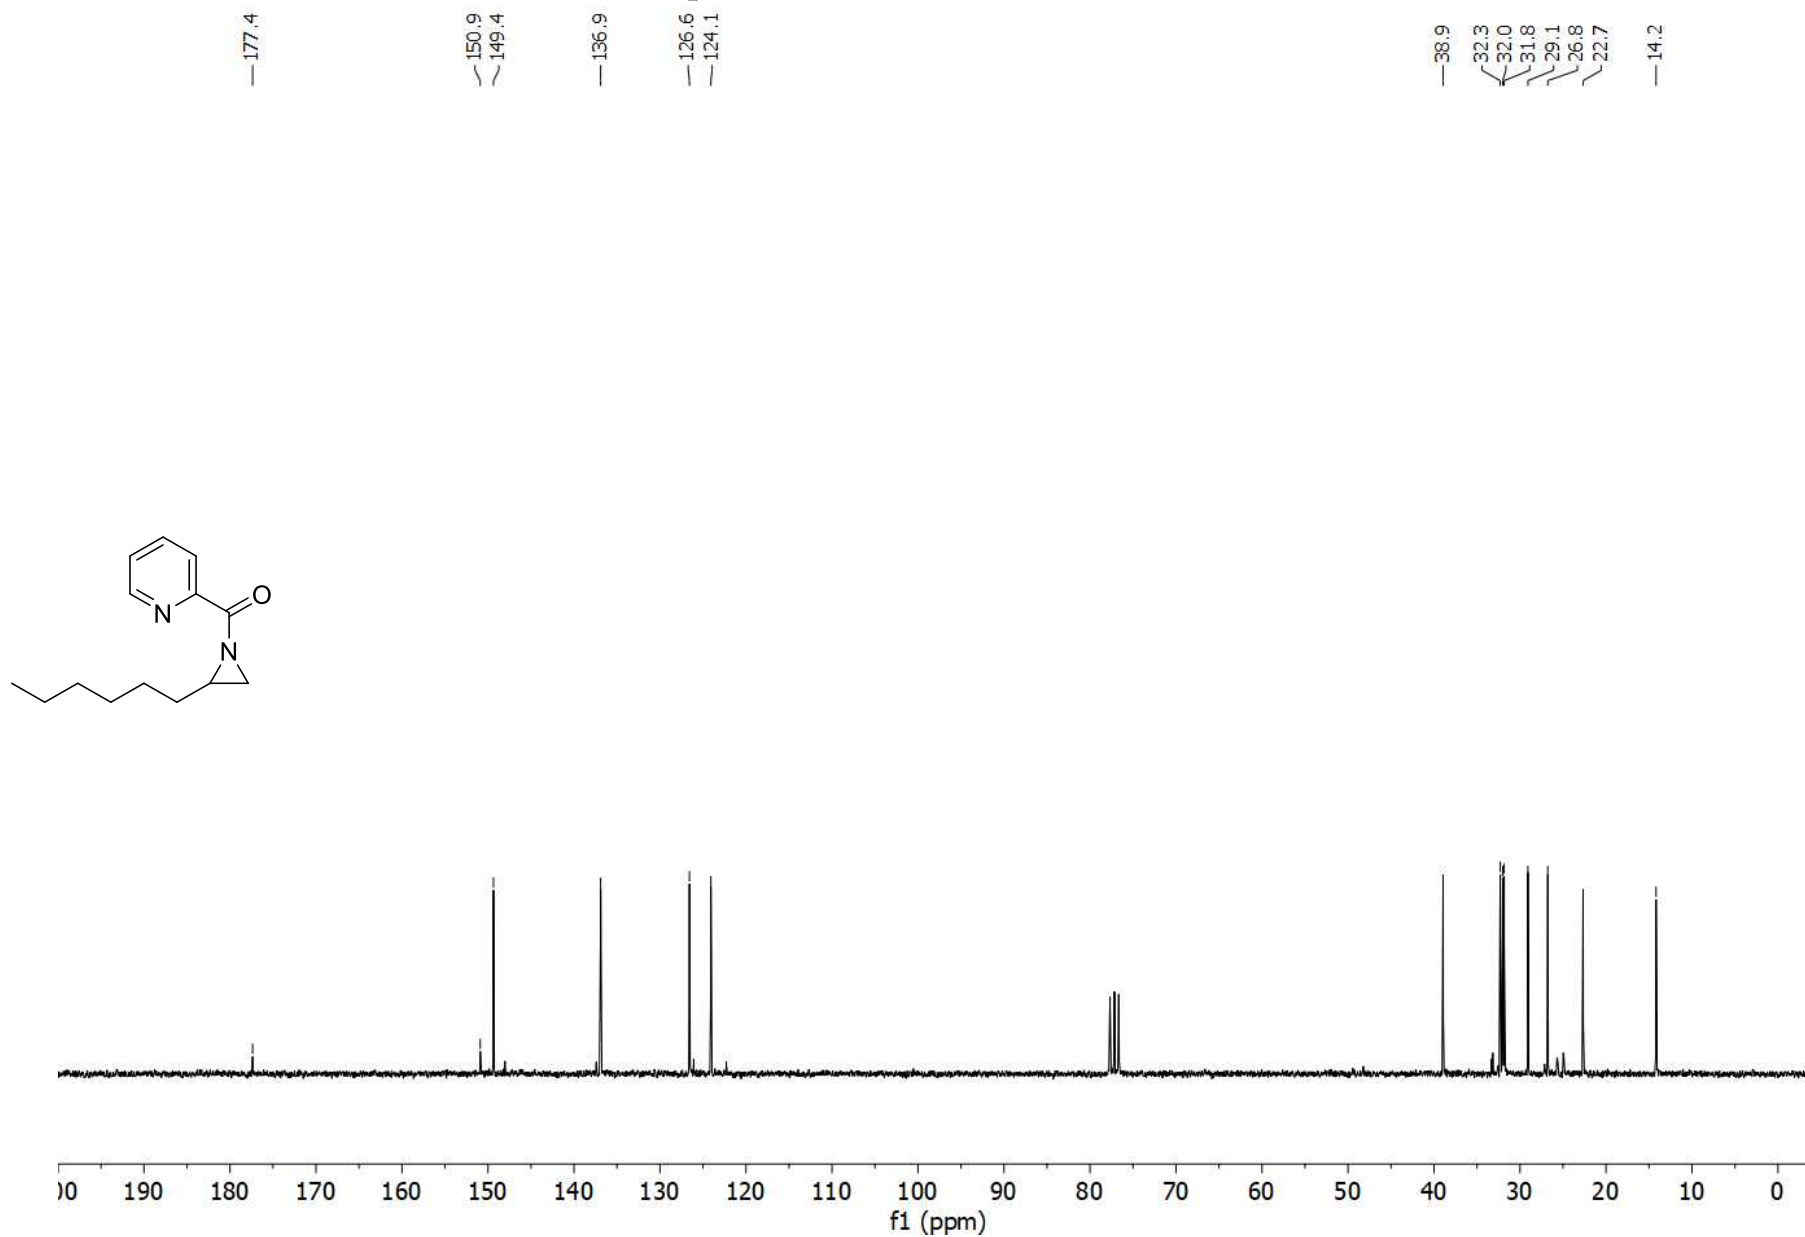

Compound **10**  $^1\text{H}$  NMR (250 MHz,  $\text{CDCl}_3$ )

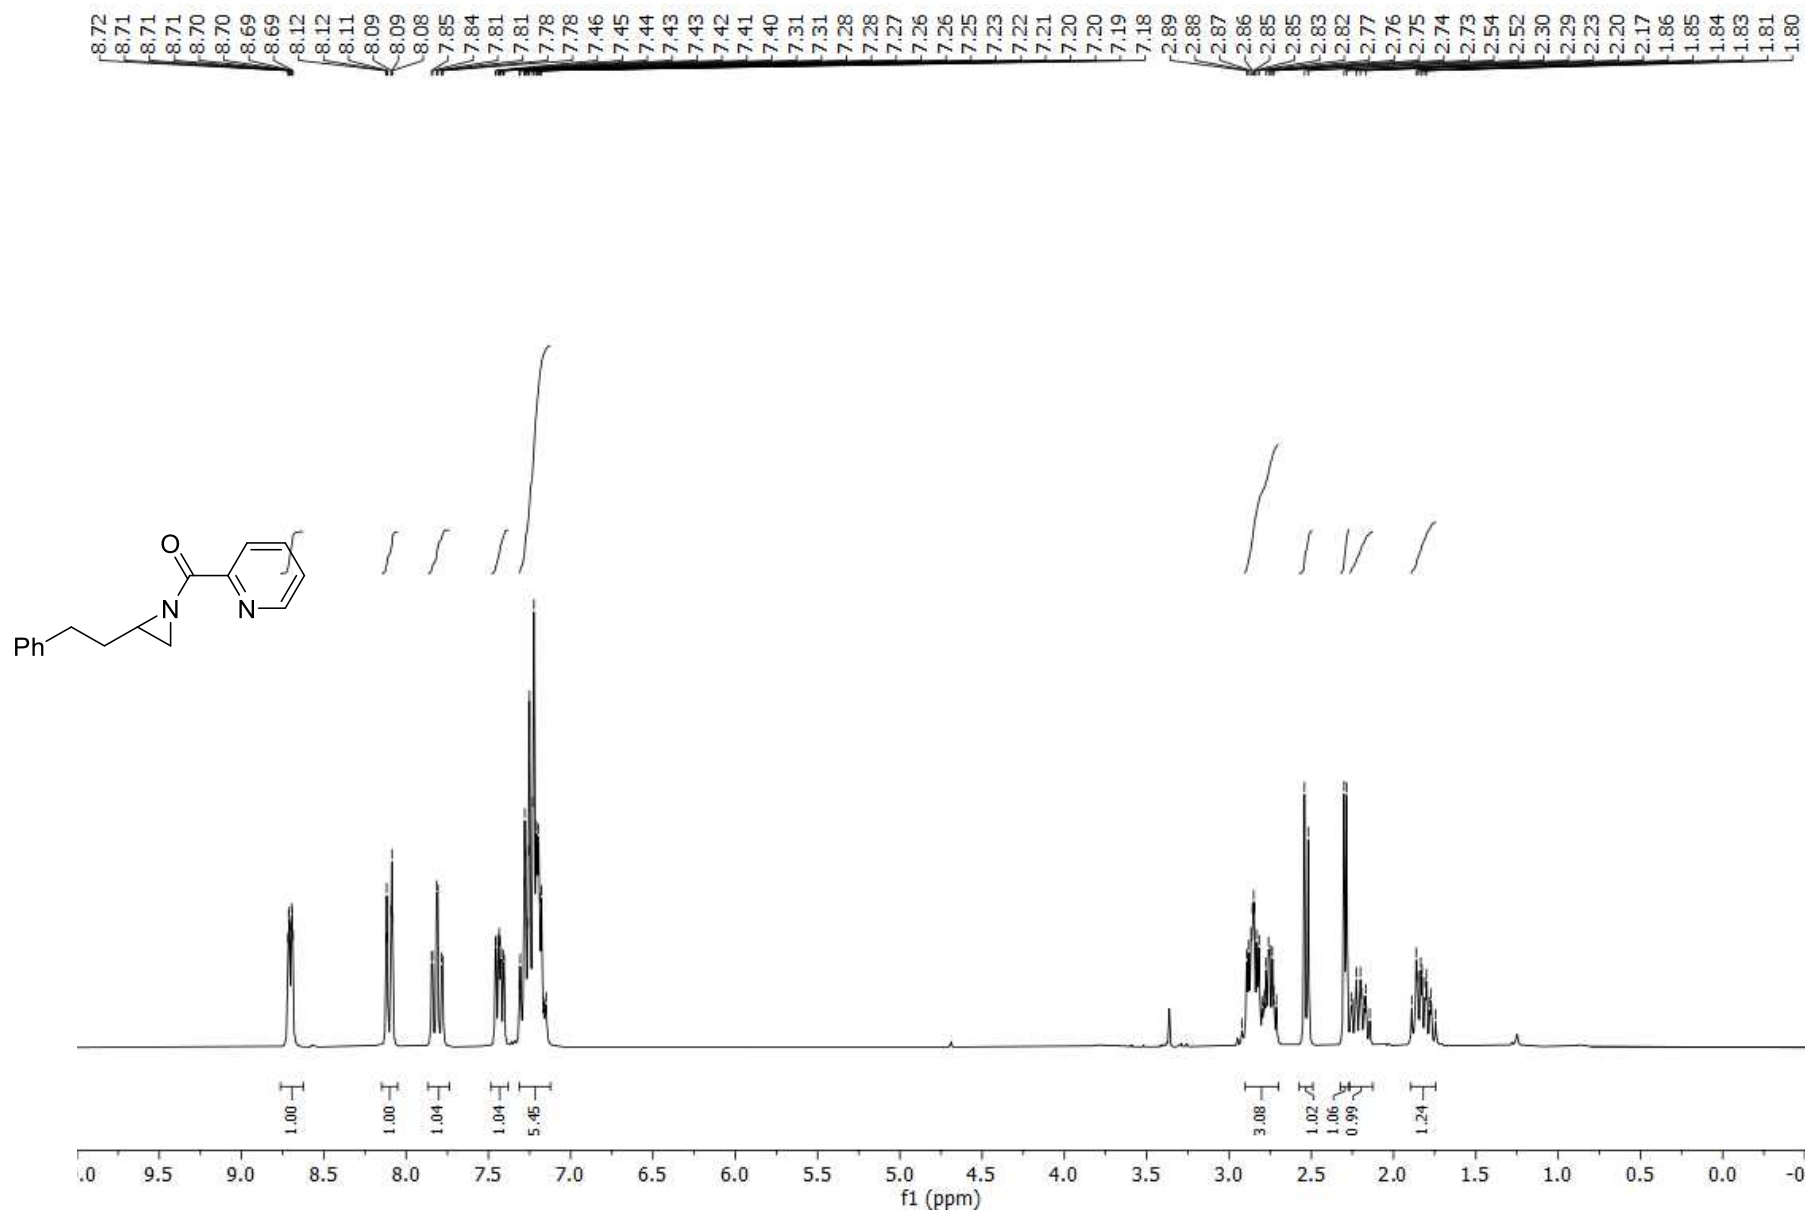

Compound **10**  $^{13}\text{C}$  NMR (101 MHz,  $\text{CDCl}_3$ )

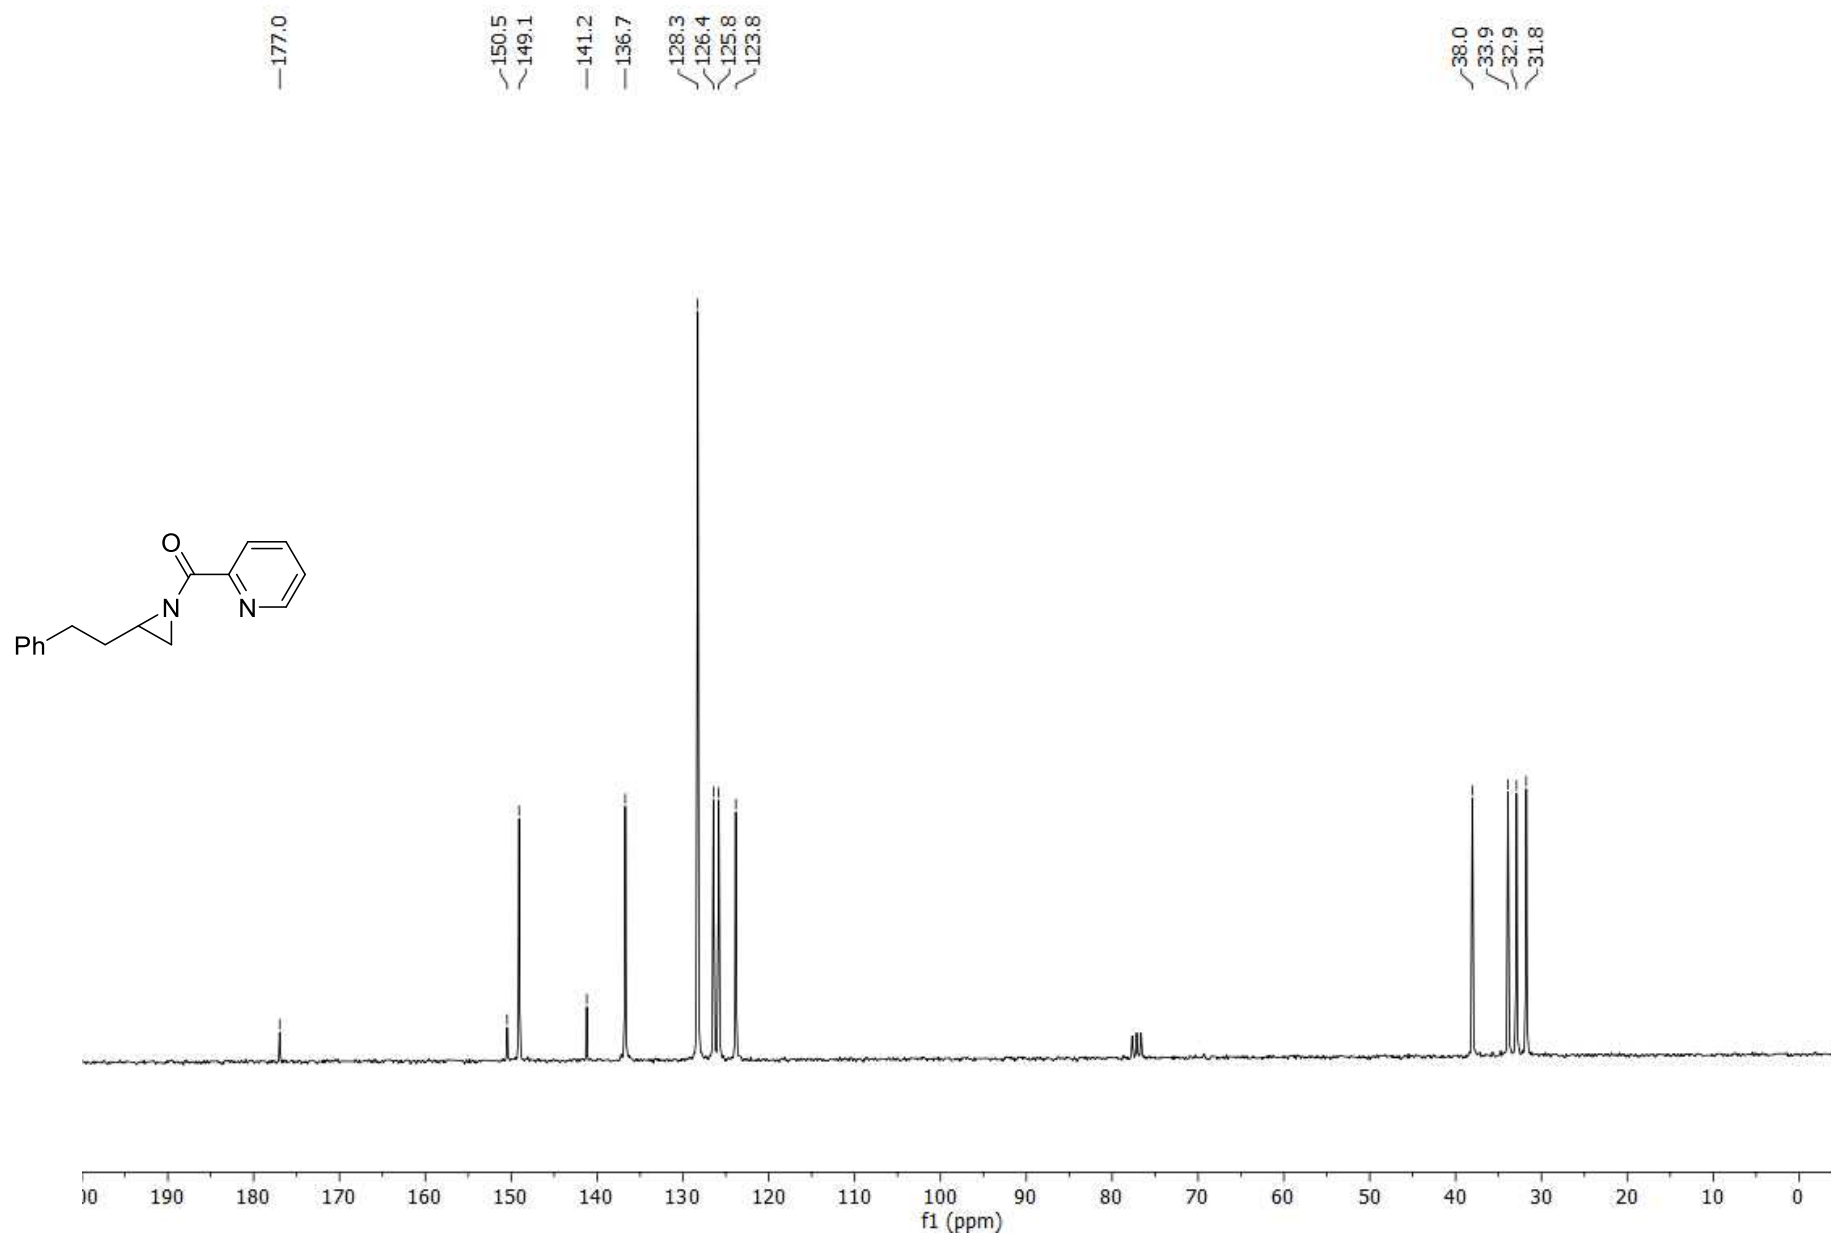

Compound **2c**  $^1\text{H}$  NMR (250 MHz,  $\text{CDCl}_3$ )

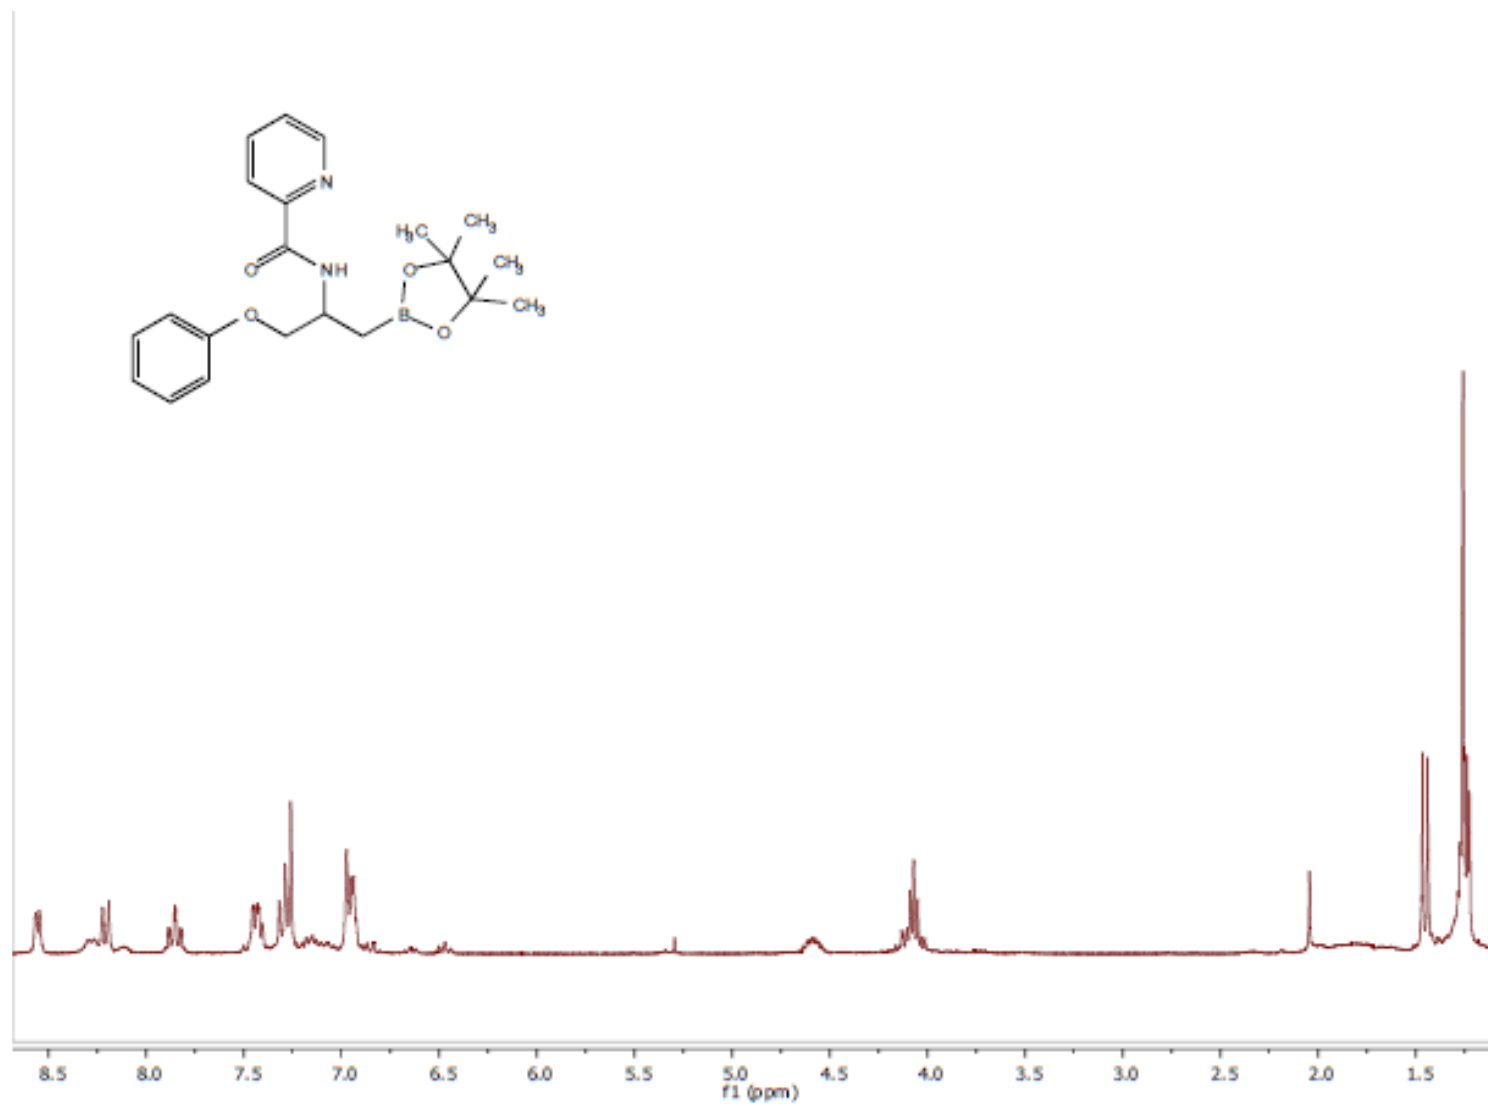

Compound **2c**  $^{13}\text{C}$  NMR (63 MHz,  $\text{CDCl}_3$ )

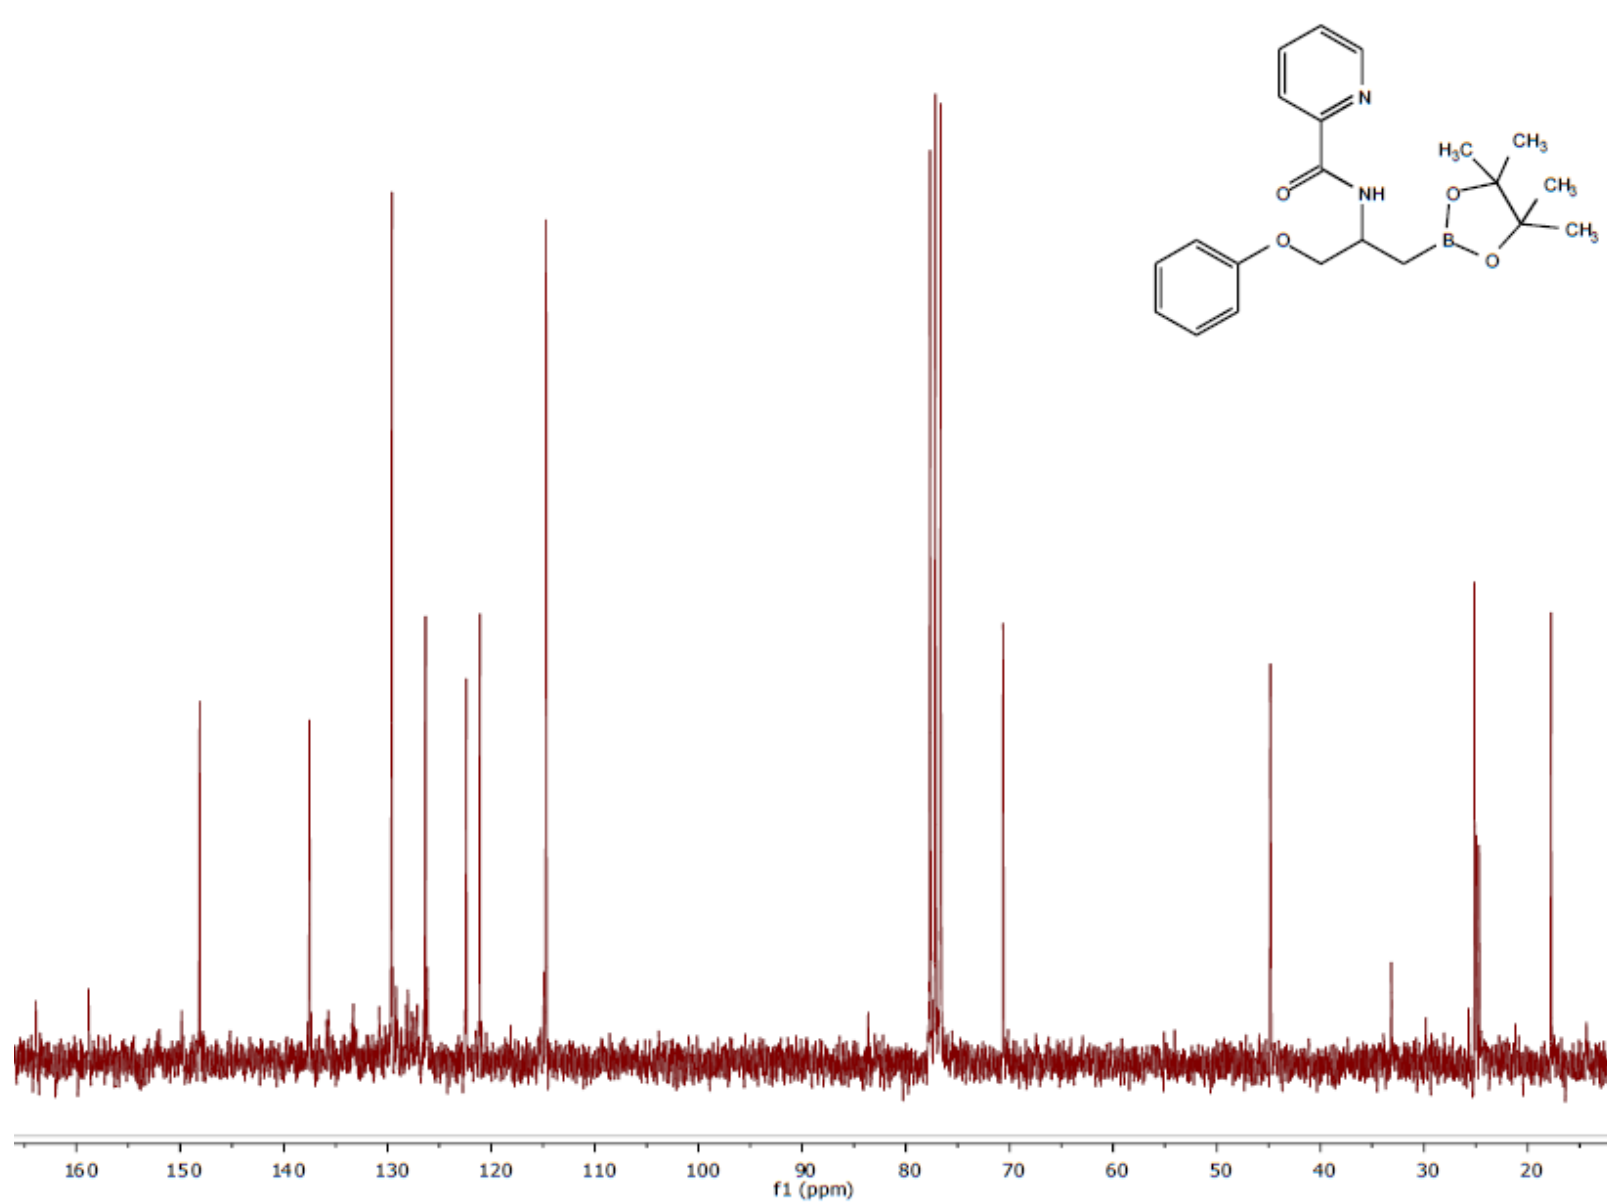

Compound **3c**  $^1\text{H}$  NMR (250 MHz,  $\text{CDCl}_3$ )

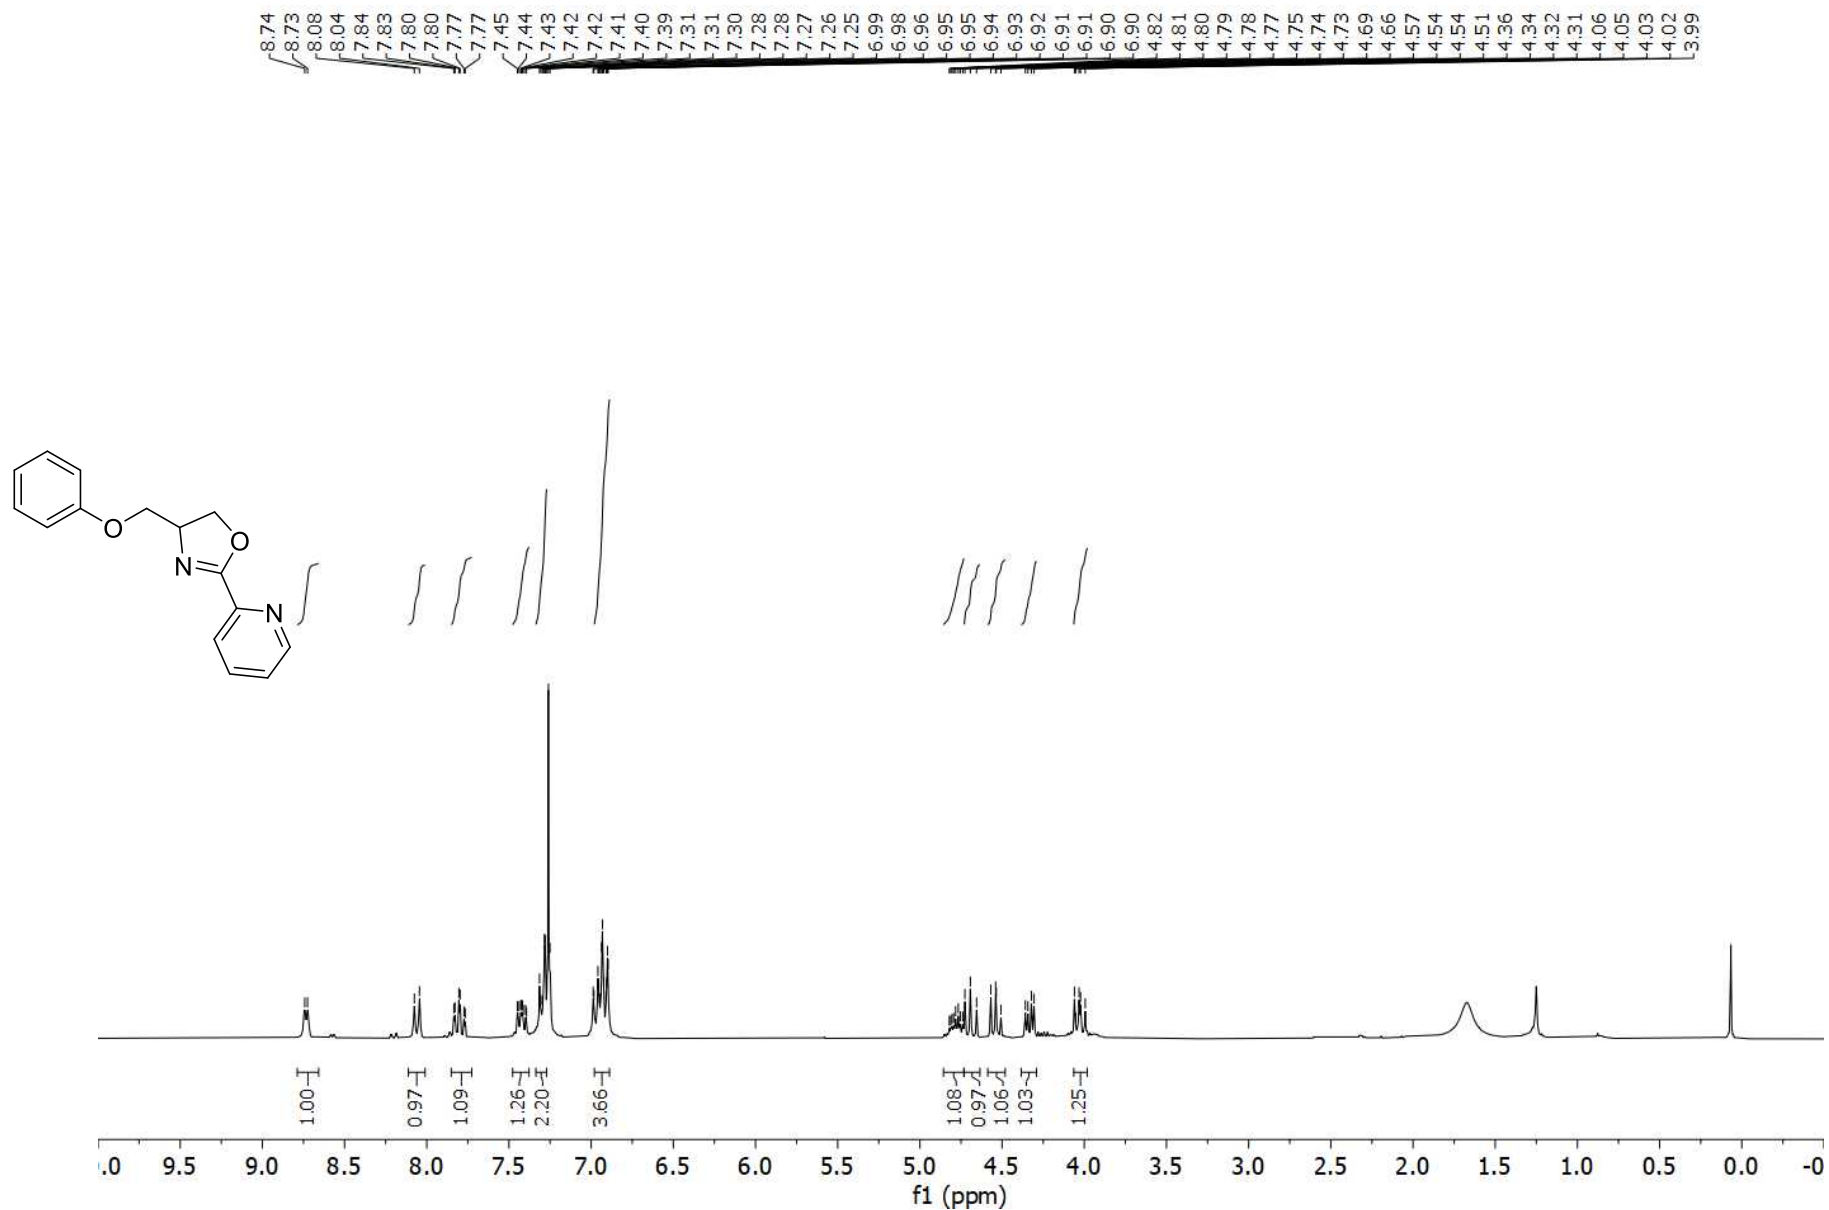

Compound **3c**  $^{13}\text{C}$  NMR (63 MHz,  $\text{CDCl}_3$ )

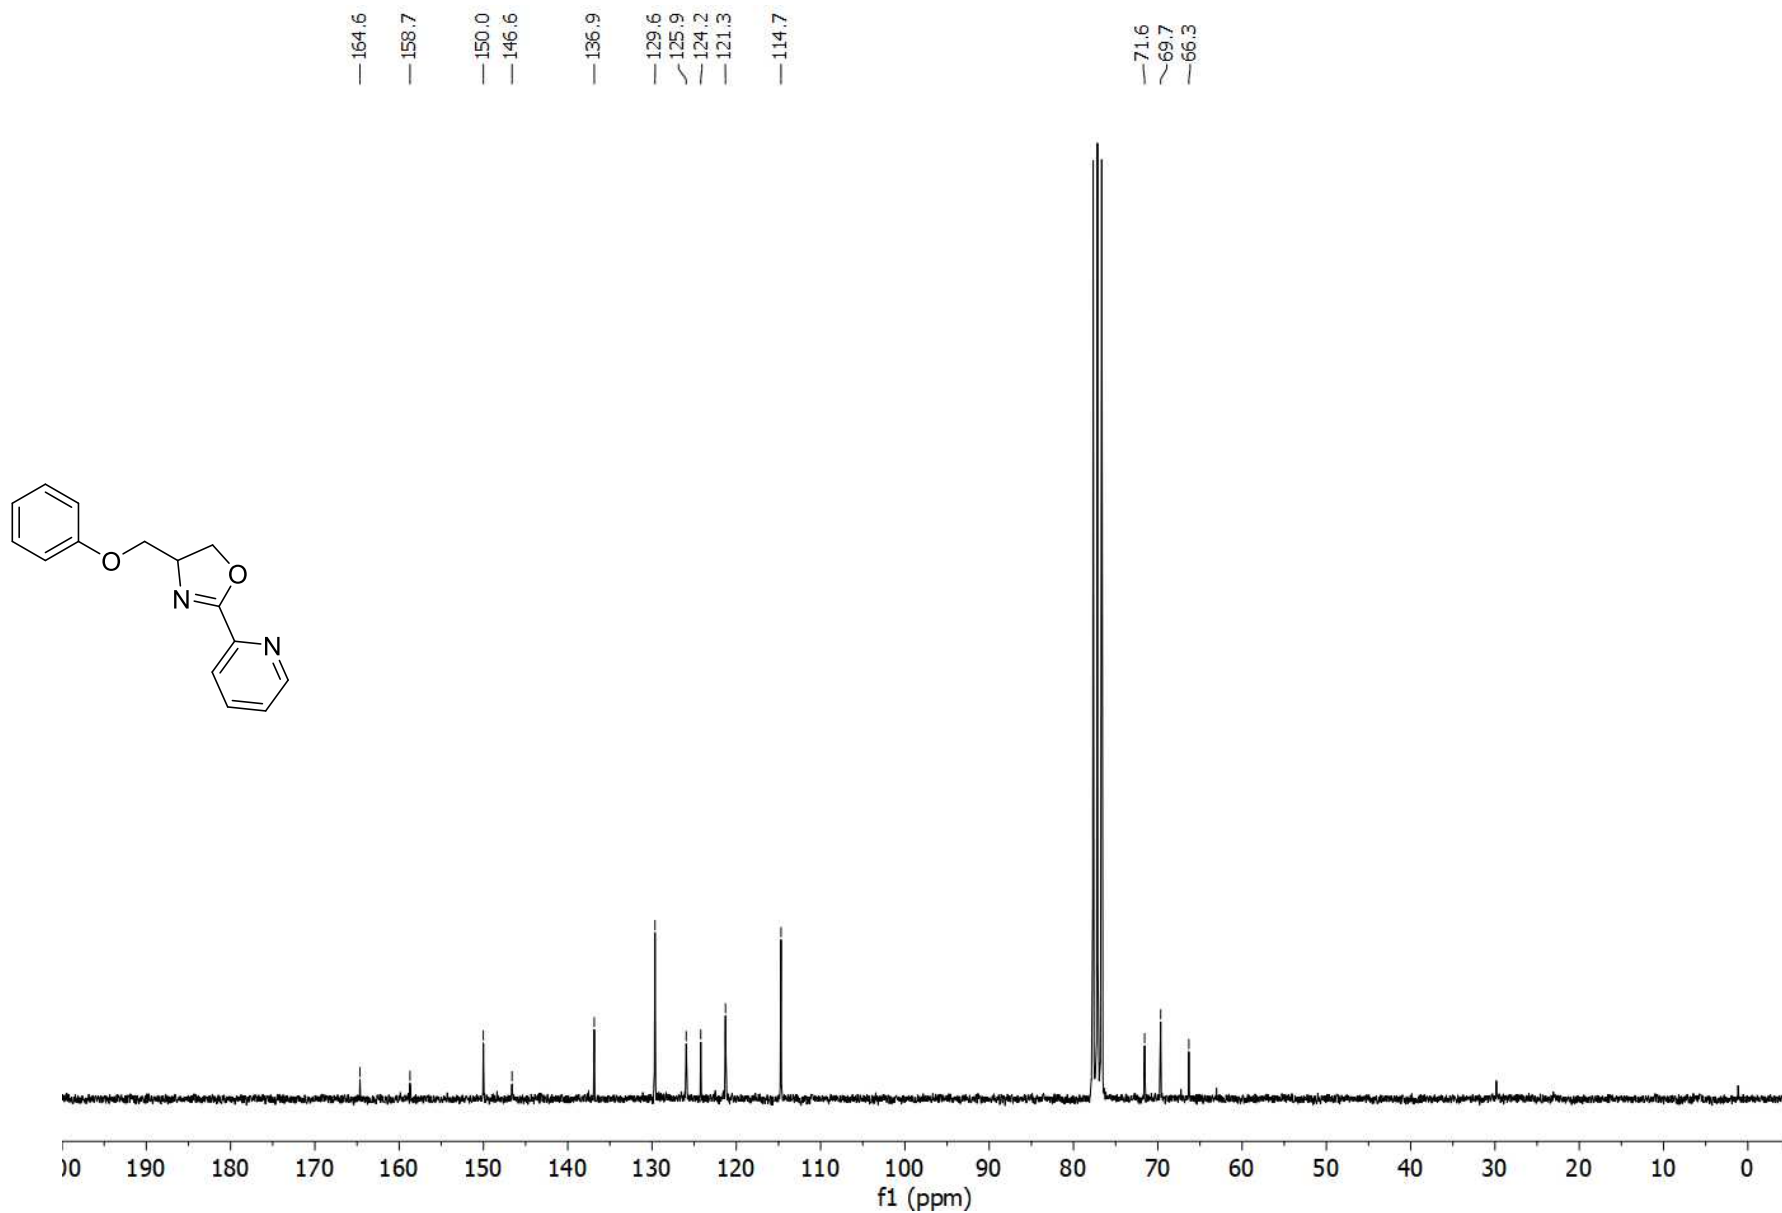

Compound **11**  $^1\text{H}$  NMR (400 MHz,  $\text{CDCl}_3$ )

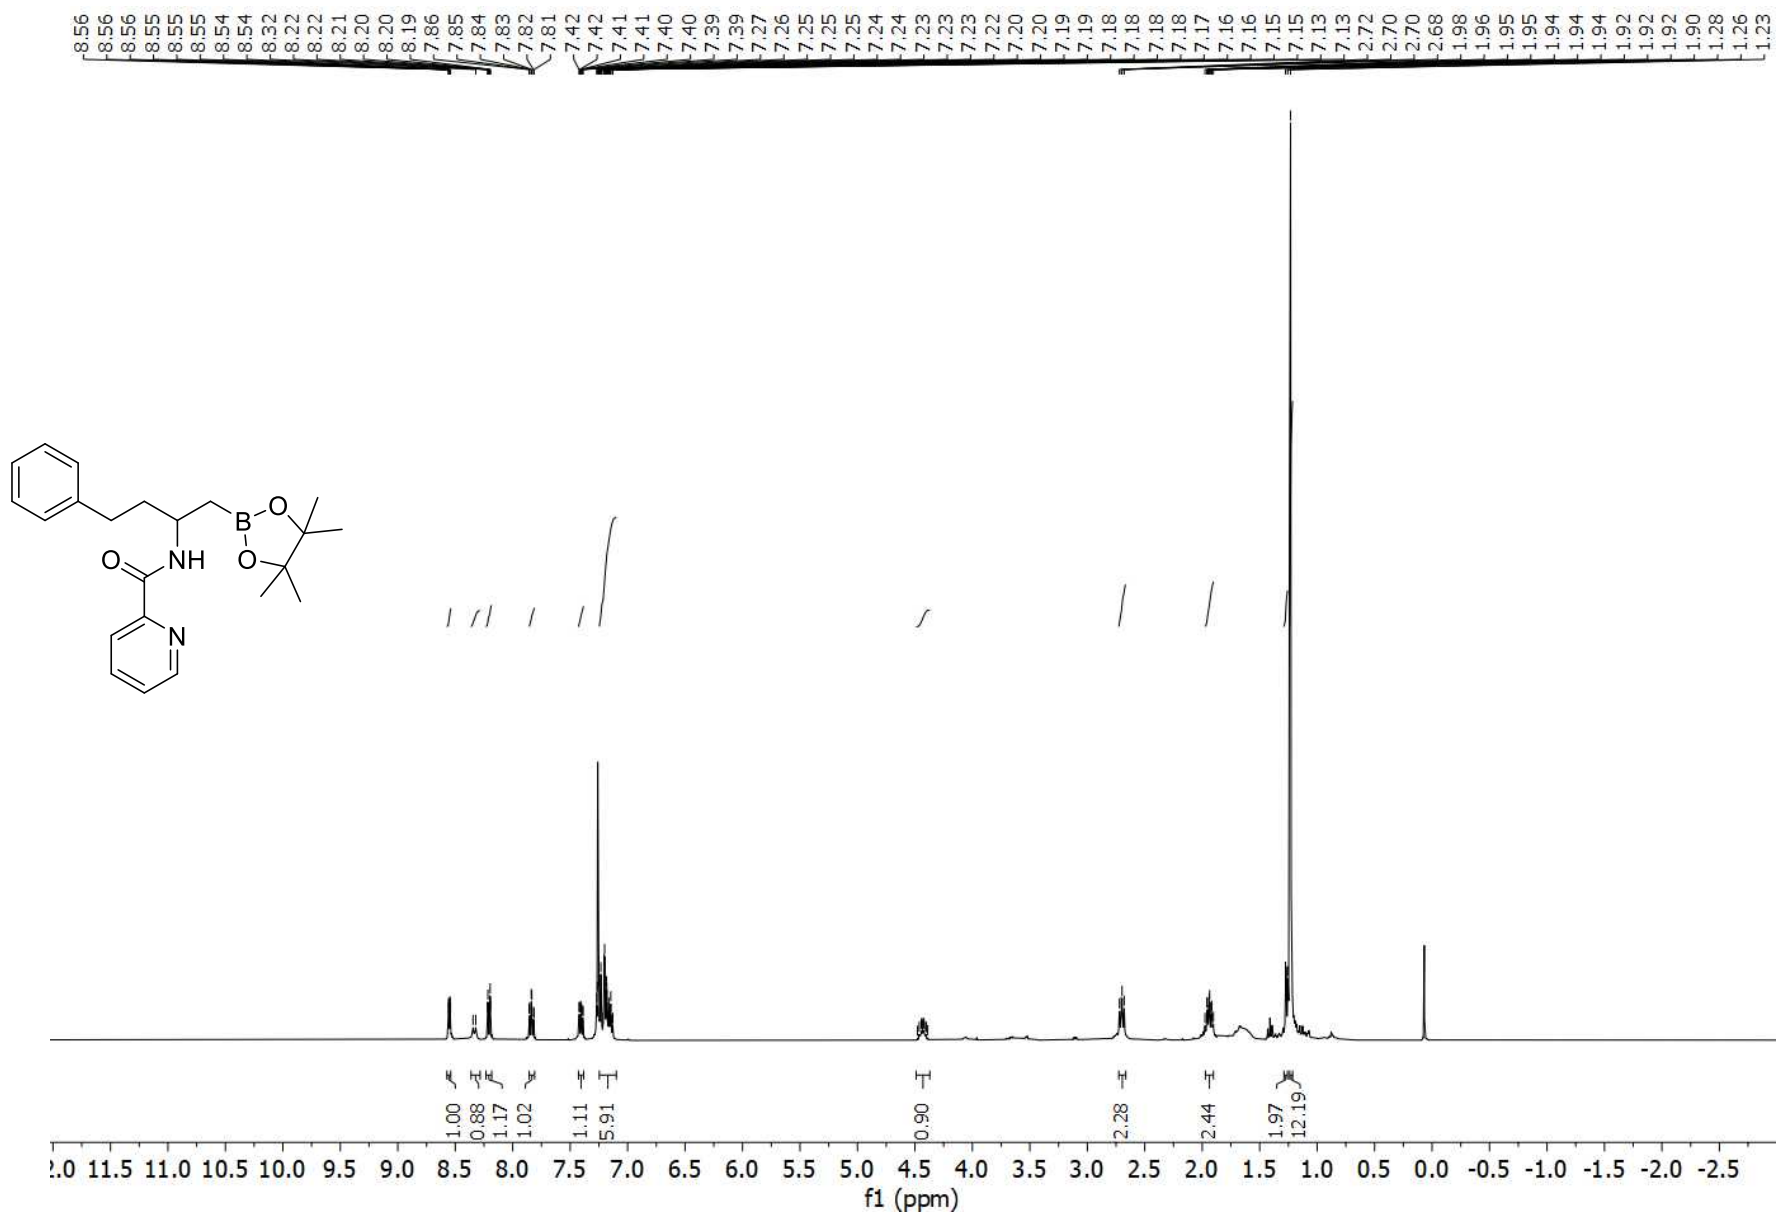

Compound **12**  $^1\text{H}$  NMR (400 MHz,  $\text{CDCl}_3$ )

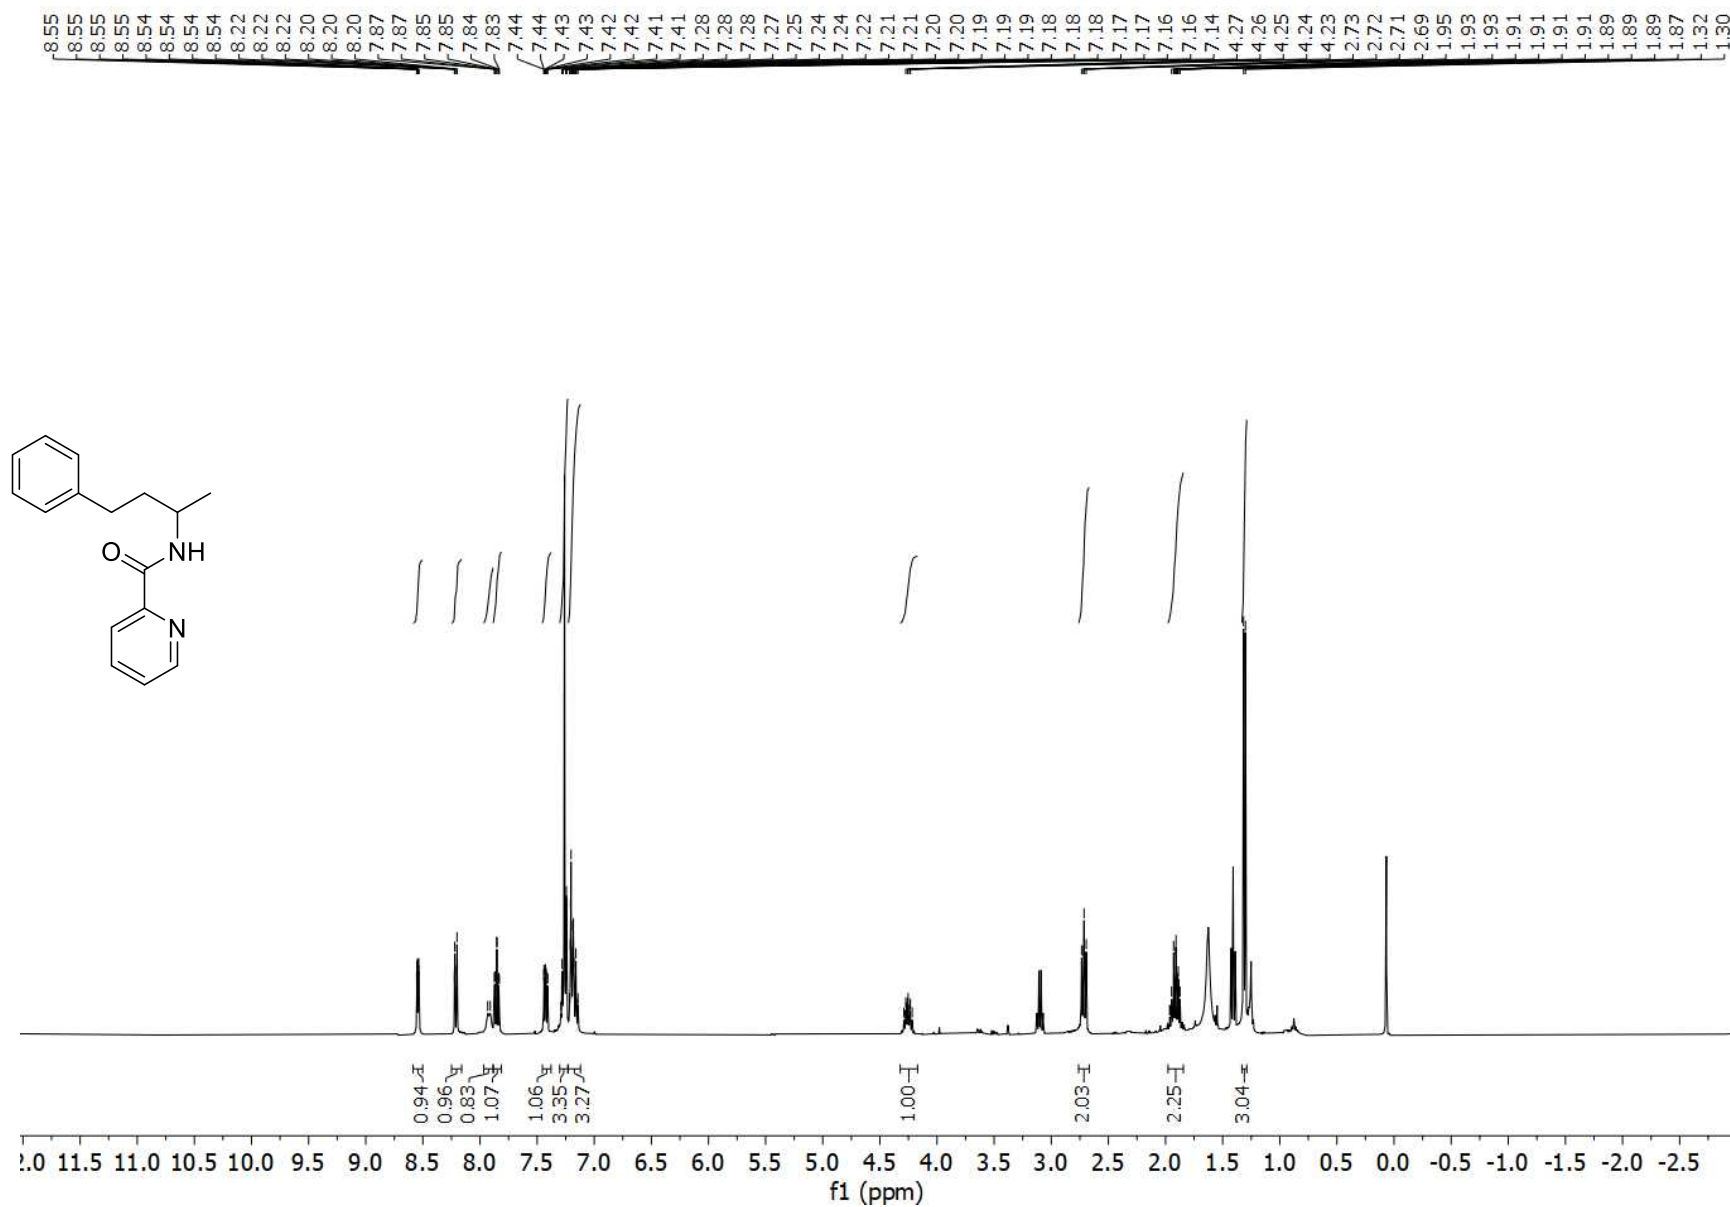

Supplement: s1 [file s1]
